# Supplementary material
Source: Research Square preprint supplement (doi:10.21203/rs.3.rs-9250361/v1)
Supplement: Supplementary file 1 [file 21acd91cfb45fa91a8ec9046.docx]

**Table S4** Primers for the qRT-PCR of the six selected differentially expressed genes (DEGs).

| Genes | Forward primer (5′–3′) | Reverse primer (5′–3′) |
| --- | --- | --- |
| *TraesCS3A03G0366700* | GCAAGTCAAATTCCACCATG | TTTGGAGGCTTCTGAAGTAA |
| *TraesCS2B03G0234400* | CTCAACTTCCGCAGCCTGTA | TAACGACTGTCGCACCCAAA |
| *TraesCS3D03G0353700* | ACCTTACTTTAATGAGCCAGTC | ACTTTCTTTGGAGGCTTCTG |
| *TraesCS2A03G0589200* | CGGTTCACTGCTATAATGGCTTCC | CGTCGAACTCGGCGTCCTTC |
| *TraesCS7A03G0921600* | AATGTCACGATGGCGGAGGC | TGGAGTAGGAGCCCTTGAAGAAGC |
| *TraesCS2B03G0309400* | GGCAGGCACAGTGTCAGAACTT | GCTGTAGTAAGCGTTGTCAAAGGA |
