# Supplementary material
Source: Research Square preprint supplement (doi:10.21203/rs.3.rs-9250361/v1)
Supplement: Supplementary file 2 [file 80dfda7983126038dee2f027.xlsx]

## Sheet: CWI44398_all_GOenrich
Table S3 Detailed information on GO enrichment and KEGG pathway annotations for differentially expressed genes (DEGs) in CWI44398, CWI78968, and CWI44183
Category	GOID	Description	GeneRatio	BgRatio	pvalue	padj	geneID	geneName	Count	Up	Up_Gene_id	Down	Down_Gene_id
BP	GO:0009415	response to water	25/1675	41/19078	8.4171e-17	1.44007e-14	123145848/123145845/123128712/123128719/100141381/123138923/123138921/123117116/123080042/123141981/100037562/123138922/543296/542888/123145839/123125681/123145843/542792/543293/123145847/123107950/543402/123101573/123138917/100037544	LOC123145848/LOC123145845/LOC123128712/LOC123128719/LOC100141381/LOC123138923/LOC123138921/LOC123117116/LOC123080042/LOC123141981/LOC100037562/LOC123138922/LOC543296/LOC542888/LOC123145839/LOC123125681/LOC123145843/LOC542792/LOC543293/LOC123145847/LOC123107950/LOC543402/LOC123101573/LOC123138917/LOC100037544	25	25	123145848/123145845/123128712/123128719/100141381/123138923/123138921/123117116/123080042/123141981/100037562/123138922/543296/542888/123145839/123125681/123145843/542792/543293/123145847/123107950/543402/123101573/123138917/100037544	0
BP	GO:0001101	response to acid chemical	27/1675	48/19078	8.81673e-17	1.44007e-14	123145848/123145845/123128712/123128719/100141381/123138923/123138921/123117116/123080042/123141981/100037562/123138922/543296/542888/123145839/123125681/123145843/542792/543293/123145847/123107950/123130649/543402/123101573/123138917/123144698/100037544	LOC123145848/LOC123145845/LOC123128712/LOC123128719/LOC100141381/LOC123138923/LOC123138921/LOC123117116/LOC123080042/LOC123141981/LOC100037562/LOC123138922/LOC543296/LOC542888/LOC123145839/LOC123125681/LOC123145843/LOC542792/LOC543293/LOC123145847/LOC123107950/LOC123130649/LOC543402/LOC123101573/LOC123138917/LOC123144698/LOC100037544	27	27	123145848/123145845/123128712/123128719/100141381/123138923/123138921/123117116/123080042/123141981/100037562/123138922/543296/542888/123145839/123125681/123145843/542792/543293/123145847/123107950/123130649/543402/123101573/123138917/123144698/100037544	0
BP	GO:1901700	response to oxygen-containing compound	27/1675	48/19078	8.81673e-17	1.44007e-14	123145848/123145845/123128712/123128719/100141381/123138923/123138921/123117116/123080042/123141981/100037562/123138922/543296/542888/123145839/123125681/123145843/542792/543293/123145847/123107950/123130649/543402/123101573/123138917/123144698/100037544	LOC123145848/LOC123145845/LOC123128712/LOC123128719/LOC100141381/LOC123138923/LOC123138921/LOC123117116/LOC123080042/LOC123141981/LOC100037562/LOC123138922/LOC543296/LOC542888/LOC123145839/LOC123125681/LOC123145843/LOC542792/LOC543293/LOC123145847/LOC123107950/LOC123130649/LOC543402/LOC123101573/LOC123138917/LOC123144698/LOC100037544	27	27	123145848/123145845/123128712/123128719/100141381/123138923/123138921/123117116/123080042/123141981/100037562/123138922/543296/542888/123145839/123125681/123145843/542792/543293/123145847/123107950/123130649/543402/123101573/123138917/123144698/100037544	0
BP	GO:0010035	response to inorganic substance	27/1675	55/19078	8.22215e-15	1.00721e-12	123145848/123145845/123128712/123128719/100141381/123138923/123138921/123117116/123080042/123141981/100037562/123138922/543296/542888/123145839/123125681/123145843/542792/543293/123145847/123107950/123130649/543402/123101573/123138917/123144698/100037544	LOC123145848/LOC123145845/LOC123128712/LOC123128719/LOC100141381/LOC123138923/LOC123138921/LOC123117116/LOC123080042/LOC123141981/LOC100037562/LOC123138922/LOC543296/LOC542888/LOC123145839/LOC123125681/LOC123145843/LOC542792/LOC543293/LOC123145847/LOC123107950/LOC123130649/LOC543402/LOC123101573/LOC123138917/LOC123144698/LOC100037544	27	27	123145848/123145845/123128712/123128719/100141381/123138923/123138921/123117116/123080042/123141981/100037562/123138922/543296/542888/123145839/123125681/123145843/542792/543293/123145847/123107950/123130649/543402/123101573/123138917/123144698/100037544	0
BP	GO:0009628	response to abiotic stimulus	25/1675	55/19078	7.48049e-13	7.33088e-11	123145848/123145845/123128712/123128719/100141381/123138923/123138921/123117116/123080042/123141981/100037562/123138922/543296/542888/123145839/123125681/123145843/542792/543293/123145847/123107950/543402/123101573/123138917/100037544	LOC123145848/LOC123145845/LOC123128712/LOC123128719/LOC100141381/LOC123138923/LOC123138921/LOC123117116/LOC123080042/LOC123141981/LOC100037562/LOC123138922/LOC543296/LOC542888/LOC123145839/LOC123125681/LOC123145843/LOC542792/LOC543293/LOC123145847/LOC123107950/LOC543402/LOC123101573/LOC123138917/LOC100037544	25	25	123145848/123145845/123128712/123128719/100141381/123138923/123138921/123117116/123080042/123141981/100037562/123138922/543296/542888/123145839/123125681/123145843/542792/543293/123145847/123107950/543402/123101573/123138917/100037544	0
BP	GO:0042221	response to chemical	73/1675	417/19078	8.21674e-09	6.71034e-07	123145848/123145845/123072603/123128712/123079278/123045265/123044677/123103118/123128719/123072609/100141381/123128714/123138923/123138921/123094210/123117116/123182400/123150467/123067098/123097997/123080042/123141981/123137373/123120422/123093441/123185774/100037562/123182987/123138922/123091631/123167888/543296/542888/123145839/123160445/123107065/123125681/123094431/123089232/123145843/12316…	LOC123145848/LOC123145845/LOC123072603/LOC123128712/LOC123079278/LOC123045265/LOC123044677/LOC123103118/LOC123128719/LOC123072609/LOC100141381/LOC123128714/LOC123138923/LOC123138921/LOC123094210/LOC123117116/LOC123182400/LOC123150467/LOC123067098/LOC123097997/LOC123080042/LOC123141981/LOC123137373/LOC123120422/LOC123093441/LOC123185774/LOC100037562/LOC123182987/LOC123138922/LOC123091631/LOC123167…	73	64	123145848/123145845/123072603/123128712/123045265/123044677/123103118/123128719/123072609/100141381/123128714/123138923/123138921/123117116/123182400/123150467/123067098/123097997/123080042/123141981/123137373/123120422/123093441/123185774/100037562/123182987/123138922/123091631/543296/542888/123145839/123160445/123107065/123125681/123094431/123089232/123145843/123165308/542792/123098718/12307260…	9	123079278/123094210/123167888/123185047/123124832/123162359/123049095/123087468/123051820
BP	GO:0010817	regulation of hormone levels	10/1675	23/19078	1.0416e-05	0.000465747	123128593/123145716/123181824/123165939/123130341/123149681/123046279/123158636/123079353/123062219	LOC123128593/LOC123145716/LOC123181824/LOC123165939/LOC123130341/LOC123149681/LOC123046279/LOC123158636/LOC123079353/LOC123062219	10	2	123128593/123145716	8	123181824/123165939/123130341/123149681/123046279/123158636/123079353/123062219
BP	GO:0042445	hormone metabolic process	10/1675	23/19078	1.0416e-05	0.000465747	123128593/123145716/123181824/123165939/123130341/123149681/123046279/123158636/123079353/123062219	LOC123128593/LOC123145716/LOC123181824/LOC123165939/LOC123130341/LOC123149681/LOC123046279/LOC123158636/LOC123079353/LOC123062219	10	2	123128593/123145716	8	123181824/123165939/123130341/123149681/123046279/123158636/123079353/123062219
BP	GO:0006855	drug transmembrane transport	32/1675	162/19078	1.04556e-05	0.000465747	123072603/123079278/123045265/123044677/123103118/123072609/123128714/123182400/123150467/123067098/123097997/123137373/123120422/123093441/123182987/123091631/123167888/123160445/123094431/123165308/123098718/123072607/123150698/123054133/123162359/123086916/123087468/123157508/123112858/123051820/123190025/123157860	LOC123072603/LOC123079278/LOC123045265/LOC123044677/LOC123103118/LOC123072609/LOC123128714/LOC123182400/LOC123150467/LOC123067098/LOC123097997/LOC123137373/LOC123120422/LOC123093441/LOC123182987/LOC123091631/LOC123167888/LOC123160445/LOC123094431/LOC123165308/LOC123098718/LOC123072607/LOC123150698/LOC123054133/LOC123162359/LOC123086916/LOC123087468/LOC123157508/LOC123112858/LOC123051820/LOC123190…	32	27	123072603/123045265/123044677/123103118/123072609/123128714/123182400/123150467/123067098/123097997/123137373/123120422/123093441/123182987/123091631/123160445/123094431/123165308/123098718/123072607/123150698/123054133/123086916/123157508/123112858/123190025/123157860	5	123079278/123167888/123162359/123087468/123051820
BP	GO:0015893	drug transport	32/1675	162/19078	1.04556e-05	0.000465747	123072603/123079278/123045265/123044677/123103118/123072609/123128714/123182400/123150467/123067098/123097997/123137373/123120422/123093441/123182987/123091631/123167888/123160445/123094431/123165308/123098718/123072607/123150698/123054133/123162359/123086916/123087468/123157508/123112858/123051820/123190025/123157860	LOC123072603/LOC123079278/LOC123045265/LOC123044677/LOC123103118/LOC123072609/LOC123128714/LOC123182400/LOC123150467/LOC123067098/LOC123097997/LOC123137373/LOC123120422/LOC123093441/LOC123182987/LOC123091631/LOC123167888/LOC123160445/LOC123094431/LOC123165308/LOC123098718/LOC123072607/LOC123150698/LOC123054133/LOC123162359/LOC123086916/LOC123087468/LOC123157508/LOC123112858/LOC123051820/LOC123190…	32	27	123072603/123045265/123044677/123103118/123072609/123128714/123182400/123150467/123067098/123097997/123137373/123120422/123093441/123182987/123091631/123160445/123094431/123165308/123098718/123072607/123150698/123054133/123086916/123157508/123112858/123190025/123157860	5	123079278/123167888/123162359/123087468/123051820
BP	GO:0042493	response to drug	32/1675	162/19078	1.04556e-05	0.000465747	123072603/123079278/123045265/123044677/123103118/123072609/123128714/123182400/123150467/123067098/123097997/123137373/123120422/123093441/123182987/123091631/123167888/123160445/123094431/123165308/123098718/123072607/123150698/123054133/123162359/123086916/123087468/123157508/123112858/123051820/123190025/123157860	LOC123072603/LOC123079278/LOC123045265/LOC123044677/LOC123103118/LOC123072609/LOC123128714/LOC123182400/LOC123150467/LOC123067098/LOC123097997/LOC123137373/LOC123120422/LOC123093441/LOC123182987/LOC123091631/LOC123167888/LOC123160445/LOC123094431/LOC123165308/LOC123098718/LOC123072607/LOC123150698/LOC123054133/LOC123162359/LOC123086916/LOC123087468/LOC123157508/LOC123112858/LOC123051820/LOC123190…	32	27	123072603/123045265/123044677/123103118/123072609/123128714/123182400/123150467/123067098/123097997/123137373/123120422/123093441/123182987/123091631/123160445/123094431/123165308/123098718/123072607/123150698/123054133/123086916/123157508/123112858/123190025/123157860	5	123079278/123167888/123162359/123087468/123051820
BP	GO:0006790	sulfur compound metabolic process	23/1675	100/19078	1.41598e-05	0.000566813	123127933/123119218/123137700/123102066/123148878/123127932/123110172/123098400/123167324/123137699/123113925/123181803/123177012/123069861/123099419/123086676/123051558/123090570/123093127/123091299/123158946/123062261/123084953	LOC123127933/LOC123119218/LOC123137700/LOC123102066/LOC123148878/LOC123127932/LOC123110172/LOC123098400/LOC123167324/LOC123137699/LOC123113925/LOC123181803/LOC123177012/LOC123069861/LOC123099419/LOC123086676/LOC123051558/LOC123090570/LOC123093127/LOC123091299/LOC123158946/LOC123062261/LOC123084953	23	19	123127933/123119218/123137700/123102066/123148878/123127932/123110172/123167324/123137699/123113925/123181803/123177012/123069861/123099419/123086676/123090570/123091299/123158946/123062261	4	123098400/123051558/123093127/123084953
BP	GO:0044272	sulfur compound biosynthetic process	16/1675	56/19078	1.62657e-05	0.000566813	123127933/123119218/123137700/123102066/123148878/123127932/123110172/123098400/123167324/123137699/123069861/123051558/123090570/123093127/123158946/123084953	LOC123127933/LOC123119218/LOC123137700/LOC123102066/LOC123148878/LOC123127932/LOC123110172/LOC123098400/LOC123167324/LOC123137699/LOC123069861/LOC123051558/LOC123090570/LOC123093127/LOC123158946/LOC123084953	16	12	123127933/123119218/123137700/123102066/123148878/123127932/123110172/123167324/123137699/123069861/123090570/123158946	4	123098400/123051558/123093127/123084953
BP	GO:0006821	chloride transport	11/1675	29/19078	1.80285e-05	0.000566813	123070428/123113787/123078872/123053389/123045549/123105489/123143623/123123272/123189297/123136113/123132086	LOC123070428/LOC123113787/LOC123078872/LOC123053389/LOC123045549/LOC123105489/LOC123143623/LOC123123272/LOC123189297/LOC123136113/LOC123132086	11	3	123053389/123045549/123189297	8	123070428/123113787/123078872/123105489/123143623/123123272/123136113/123132086
BP	GO:0009607	response to biotic stimulus	9/1675	20/19078	2.08217e-05	0.000566813	123080931/123063611/123072755/123050578/123042685/123186545/123169410/123139793/123169411	LOC123080931/LOC123063611/LOC123072755/LOC123050578/LOC123042685/LOC123186545/LOC123169410/LOC123139793/LOC123169411	9	9	123080931/123063611/123072755/123050578/123042685/123186545/123169410/123139793/123169411	0
BP	GO:0043207	response to external biotic stimulus	9/1675	20/19078	2.08217e-05	0.000566813	123080931/123063611/123072755/123050578/123042685/123186545/123169410/123139793/123169411	LOC123080931/LOC123063611/LOC123072755/LOC123050578/LOC123042685/LOC123186545/LOC123169410/LOC123139793/LOC123169411	9	9	123080931/123063611/123072755/123050578/123042685/123186545/123169410/123139793/123169411	0
BP	GO:0051707	response to other organism	9/1675	20/19078	2.08217e-05	0.000566813	123080931/123063611/123072755/123050578/123042685/123186545/123169410/123139793/123169411	LOC123080931/LOC123063611/LOC123072755/LOC123050578/LOC123042685/LOC123186545/LOC123169410/LOC123139793/LOC123169411	9	9	123080931/123063611/123072755/123050578/123042685/123186545/123169410/123139793/123169411	0
BP	GO:0098542	defense response to other organism	9/1675	20/19078	2.08217e-05	0.000566813	123080931/123063611/123072755/123050578/123042685/123186545/123169410/123139793/123169411	LOC123080931/LOC123063611/LOC123072755/LOC123050578/LOC123042685/LOC123186545/LOC123169410/LOC123139793/LOC123169411	9	9	123080931/123063611/123072755/123050578/123042685/123186545/123169410/123139793/123169411	0
BP	GO:0015698	inorganic anion transport	20/1675	85/19078	3.55435e-05	0.000916649	123079164/123070428/123113787/123078872/123053389/123045549/123105489/123098407/123143623/123123272/123048932/123070775/123150081/123189297/123136113/123132086/123130649/100136990/123063357/123144698	LOC123079164/LOC123070428/LOC123113787/LOC123078872/LOC123053389/LOC123045549/LOC123105489/LOC123098407/LOC123143623/LOC123123272/LOC123048932/LOC123070775/LOC123150081/LOC123189297/LOC123136113/LOC123132086/LOC123130649/LOC100136990/LOC123063357/LOC123144698	20	11	123079164/123053389/123045549/123098407/123048932/123070775/123150081/123189297/123130649/100136990/123144698	9	123070428/123113787/123078872/123105489/123143623/123123272/123136113/123132086/123063357
BP	GO:0009617	response to bacterium	6/1675	10/19078	6.98973e-05	0.00148912	123080931/123063611/123072755/123050578/123042685/123186545	LOC123080931/LOC123063611/LOC123072755/LOC123050578/LOC123042685/LOC123186545	6	6	123080931/123063611/123072755/123050578/123042685/123186545	0
BP	GO:0009620	response to fungus	6/1675	10/19078	6.98973e-05	0.00148912	123080931/123063611/123072755/123050578/123042685/123186545	LOC123080931/LOC123063611/LOC123072755/LOC123050578/LOC123042685/LOC123186545	6	6	123080931/123063611/123072755/123050578/123042685/123186545	0
BP	GO:0042742	defense response to bacterium	6/1675	10/19078	6.98973e-05	0.00148912	123080931/123063611/123072755/123050578/123042685/123186545	LOC123080931/LOC123063611/LOC123072755/LOC123050578/LOC123042685/LOC123186545	6	6	123080931/123063611/123072755/123050578/123042685/123186545	0
BP	GO:0050832	defense response to fungus	6/1675	10/19078	6.98973e-05	0.00148912	123080931/123063611/123072755/123050578/123042685/123186545	LOC123080931/LOC123063611/LOC123072755/LOC123050578/LOC123042685/LOC123186545	6	6	123080931/123063611/123072755/123050578/123042685/123186545	0
BP	GO:0009690	cytokinin metabolic process	8/1675	20/19078	0.000166914	0.00327151	123181824/123165939/123130341/123149681/123046279/123158636/123079353/123062219	LOC123181824/LOC123165939/LOC123130341/LOC123149681/LOC123046279/LOC123158636/LOC123079353/LOC123062219	8	0		8	123181824/123165939/123130341/123149681/123046279/123158636/123079353/123062219
BP	GO:0034754	cellular hormone metabolic process	8/1675	20/19078	0.000166914	0.00327151	123181824/123165939/123130341/123149681/123046279/123158636/123079353/123062219	LOC123181824/LOC123165939/LOC123130341/LOC123149681/LOC123046279/LOC123158636/LOC123079353/LOC123062219	8	0		8	123181824/123165939/123130341/123149681/123046279/123158636/123079353/123062219
BP	GO:0009605	response to external stimulus	9/1675	28/19078	0.000448659	0.00845549	123080931/123063611/123072755/123050578/123042685/123186545/123169410/123139793/123169411	LOC123080931/LOC123063611/LOC123072755/LOC123050578/LOC123042685/LOC123186545/LOC123169410/LOC123139793/LOC123169411	9	9	123080931/123063611/123072755/123050578/123042685/123186545/123169410/123139793/123169411	0
BP	GO:0000097	sulfur amino acid biosynthetic process	7/1675	18/19078	0.000530191	0.00962199	123119218/123102066/123110172/123098400/123090570/123093127/123084953	LOC123119218/LOC123102066/LOC123110172/LOC123098400/LOC123090570/LOC123093127/LOC123084953	7	4	123119218/123102066/123110172/123090570	3	123098400/123093127/123084953
BP	GO:0000096	sulfur amino acid metabolic process	8/1675	24/19078	0.00070868	0.0121665	123119218/123102066/123110172/123098400/123113925/123090570/123093127/123084953	LOC123119218/LOC123102066/LOC123110172/LOC123098400/LOC123113925/LOC123090570/LOC123093127/LOC123084953	8	5	123119218/123102066/123110172/123113925/123090570	3	123098400/123093127/123084953
BP	GO:0044262	cellular carbohydrate metabolic process	39/1675	261/19078	0.00072006	0.0121665	123044580/123092190/123044576/123052082/123097521/123068318/123052445/123049142/123085854/123145161/123188320/123148738/100270668/123185146/123121827/123063345/123145030/542972/123147783/123085122/123168174/123182644/123076710/123044579/123168533/123168995/123164298/123158976/123127938/123164299/123153374/123162241/123053707/606356/123187938/123063086/123158862/123167634/123049002	LOC123044580/LOC123092190/LOC123044576/LOC123052082/LOC123097521/LOC123068318/LOC123052445/LOC123049142/LOC123085854/LOC123145161/LOC123188320/LOC123148738/LOC100270668/LOC123185146/LOC123121827/LOC123063345/LOC123145030/LOC542972/LOC123147783/LOC123085122/LOC123168174/LOC123182644/LOC123076710/LOC123044579/LOC123168533/LOC123168995/LOC123164298/LOC123158976/LOC123127938/LOC123164299/LOC123153374…	39	34	123044580/123092190/123044576/123052082/123097521/123052445/123049142/123085854/123145161/123188320/123148738/123185146/123145030/542972/123147783/123085122/123168174/123182644/123044579/123168533/123168995/123164298/123158976/123127938/123164299/123153374/123162241/123053707/606356/123187938/123063086/123158862/123167634/123049002	5	123068318/100270668/123121827/123063345/123076710
BP	GO:0005976	polysaccharide metabolic process	31/1675	195/19078	0.000870598	0.0142198	123044580/123044576/123068318/123052445/123049142/123145161/123188320/123148738/123185146/123069423/123121827/123077920/123147783/123105923/123128167/123093753/123076710/123044579/123168533/123168995/123164298/123158976/123164299/123153374/123162241/123181646/123052101/606356/123098985/123158862/123167634	LOC123044580/LOC123044576/LOC123068318/LOC123052445/LOC123049142/LOC123145161/LOC123188320/LOC123148738/LOC123185146/LOC123069423/LOC123121827/LOC123077920/LOC123147783/LOC123105923/LOC123128167/LOC123093753/LOC123076710/LOC123044579/LOC123168533/LOC123168995/LOC123164298/LOC123158976/LOC123164299/LOC123153374/LOC123162241/LOC123181646/LOC123052101/LOC606356/LOC123098985/LOC123158862/LOC123167634	31	28	123044580/123044576/123052445/123049142/123145161/123188320/123148738/123185146/123069423/123077920/123147783/123105923/123128167/123093753/123044579/123168533/123168995/123164298/123158976/123164299/123153374/123162241/123181646/123052101/606356/123098985/123158862/123167634	3	123068318/123121827/123076710
BP	GO:0000272	polysaccharide catabolic process	8/1675	26/19078	0.00128452	0.0183083	123069423/123077920/123105923/123128167/123093753/123181646/123052101/123098985	LOC123069423/LOC123077920/LOC123105923/LOC123128167/LOC123093753/LOC123181646/LOC123052101/LOC123098985	8	8	123069423/123077920/123105923/123128167/123093753/123181646/123052101/123098985	0
BP	GO:0006556	S-adenosylmethionine biosynthetic process	5/1675	11/19078	0.00152551	0.0183083	123127933/123137700/123127932/123137699/123069861	LOC123127933/LOC123137700/LOC123127932/LOC123137699/LOC123069861	5	5	123127933/123137700/123127932/123137699/123069861	0
BP	GO:0046500	S-adenosylmethionine metabolic process	5/1675	11/19078	0.00152551	0.0183083	123127933/123137700/123127932/123137699/123069861	LOC123127933/LOC123137700/LOC123127932/LOC123137699/LOC123069861	5	5	123127933/123137700/123127932/123137699/123069861	0
BP	GO:0003006	developmental process involved in reproduction	7/1675	21/19078	0.00153192	0.0183083	123167003/123083460/123148855/123156713/123106932/123150986/123164598	LOC123167003/LOC123083460/LOC123148855/LOC123156713/LOC123106932/LOC123150986/LOC123164598	7	7	123167003/123083460/123148855/123156713/123106932/123150986/123164598	0
BP	GO:0009790	embryo development	7/1675	21/19078	0.00153192	0.0183083	123167003/123083460/123148855/123156713/123106932/123150986/123164598	LOC123167003/LOC123083460/LOC123148855/LOC123156713/LOC123106932/LOC123150986/LOC123164598	7	7	123167003/123083460/123148855/123156713/123106932/123150986/123164598	0
BP	GO:0009793	embryo development ending in seed dormancy	7/1675	21/19078	0.00153192	0.0183083	123167003/123083460/123148855/123156713/123106932/123150986/123164598	LOC123167003/LOC123083460/LOC123148855/LOC123156713/LOC123106932/LOC123150986/LOC123164598	7	7	123167003/123083460/123148855/123156713/123106932/123150986/123164598	0
BP	GO:0010154	fruit development	7/1675	21/19078	0.00153192	0.0183083	123167003/123083460/123148855/123156713/123106932/123150986/123164598	LOC123167003/LOC123083460/LOC123148855/LOC123156713/LOC123106932/LOC123150986/LOC123164598	7	7	123167003/123083460/123148855/123156713/123106932/123150986/123164598	0
BP	GO:0048316	seed development	7/1675	21/19078	0.00153192	0.0183083	123167003/123083460/123148855/123156713/123106932/123150986/123164598	LOC123167003/LOC123083460/LOC123148855/LOC123156713/LOC123106932/LOC123150986/LOC123164598	7	7	123167003/123083460/123148855/123156713/123106932/123150986/123164598	0
BP	GO:0048608	reproductive structure development	7/1675	21/19078	0.00153192	0.0183083	123167003/123083460/123148855/123156713/123106932/123150986/123164598	LOC123167003/LOC123083460/LOC123148855/LOC123156713/LOC123106932/LOC123150986/LOC123164598	7	7	123167003/123083460/123148855/123156713/123106932/123150986/123164598	0
BP	GO:0048731	system development	7/1675	21/19078	0.00153192	0.0183083	123167003/123083460/123148855/123156713/123106932/123150986/123164598	LOC123167003/LOC123083460/LOC123148855/LOC123156713/LOC123106932/LOC123150986/LOC123164598	7	7	123167003/123083460/123148855/123156713/123106932/123150986/123164598	0
BP	GO:0061458	reproductive system development	7/1675	21/19078	0.00153192	0.0183083	123167003/123083460/123148855/123156713/123106932/123150986/123164598	LOC123167003/LOC123083460/LOC123148855/LOC123156713/LOC123106932/LOC123150986/LOC123164598	7	7	123167003/123083460/123148855/123156713/123106932/123150986/123164598	0
BP	GO:0006979	response to oxidative stress	41/1675	290/19078	0.00160151	0.0186843	123051568/123143229/123040643/123050885/543313/123112512/123151125/123055645/123078151/123160071/123072701/123043706/123061077/123157228/123130109/123069666/123186813/100192164/123167064/123154588/123189671/123052925/123078819/123180481/123097394/123128512/123080888/100136987/123184740/123167122/123043698/100192163/123151626/123088377/123143227/123053783/123050787/123160997/123041590/123169185/12…	LOC123051568/LOC123143229/LOC123040643/LOC123050885/LOC543313/LOC123112512/LOC123151125/LOC123055645/LOC123078151/LOC123160071/LOC123072701/LOC123043706/LOC123061077/LOC123157228/LOC123130109/LOC123069666/LOC123186813/LOC100192164/LOC123167064/LOC123154588/LOC123189671/LOC123052925/LOC123078819/LOC123180481/LOC123097394/LOC123128512/LOC123080888/LOC100136987/LOC123184740/LOC123167122/LOC123043698…	41	11	123078151/123061077/123157228/123069666/123189671/123180481/123097394/123128512/123053783/123169185/123110643	30	123051568/123143229/123040643/123050885/543313/123112512/123151125/123055645/123160071/123072701/123043706/123130109/123186813/100192164/123167064/123154588/123052925/123078819/123080888/100136987/123184740/123167122/123043698/100192163/123151626/123088377/123143227/123050787/123160997/123041590
BP	GO:0006952	defense response	16/1675	84/19078	0.00238942	0.0270276	123080931/100526689/123182050/123063611/123072755/123056164/123050578/123042685/123071460/123186545/123169410/123139793/123169411/100682451/123051240/100682514	LOC123080931/LOC100526689/LOC123182050/LOC123063611/LOC123072755/LOC123056164/LOC123050578/LOC123042685/LOC123071460/LOC123186545/LOC123169410/LOC123139793/LOC123169411/LOC100682451/LOC123051240/LOC100682514	16	15	123080931/100526689/123182050/123063611/123072755/123056164/123050578/123042685/123071460/123186545/123169410/123139793/123169411/123051240/100682514	1	100682451
BP	GO:0071941	nitrogen cycle metabolic process	5/1675	12/19078	0.00242697	0.0270276	123145655/123135422/123143006/123138401/123128536	LOC123145655/LOC123135422/LOC123143006/LOC123138401/LOC123128536	5	3	123145655/123138401/123128536	2	123135422/123143006
BP	GO:0000160	phosphorelay signal transduction system	15/1675	77/19078	0.00256668	0.0279483	123087086/123169796/123190998/123103029/101290612/123095904/123080746/123120307/123085525/123111217/123061942/123079047/123180731/123055148/101290611	LOC123087086/LOC123169796/LOC123190998/LOC123103029/LOC101290612/LOC123095904/LOC123080746/LOC123120307/LOC123085525/LOC123111217/LOC123061942/LOC123079047/LOC123180731/LOC123055148/LOC101290611	15	2	123061942/123079047	13	123087086/123169796/123190998/123103029/101290612/123095904/123080746/123120307/123085525/123111217/123180731/123055148/101290611
BP	GO:0035556	intracellular signal transduction	22/1675	134/19078	0.00306274	0.0326249	123111429/123053623/123120543/123162645/123087086/123169796/123181820/123130282/123190998/123103029/101290612/123095904/123080746/123103237/123120307/123085525/123111217/123061942/123079047/123180731/123055148/101290611	LOC123111429/LOC123053623/LOC123120543/LOC123162645/LOC123087086/LOC123169796/LOC123181820/LOC123130282/LOC123190998/LOC123103029/LOC101290612/LOC123095904/LOC123080746/LOC123103237/LOC123120307/LOC123085525/LOC123111217/LOC123061942/LOC123079047/LOC123180731/LOC123055148/LOC101290611	22	9	123111429/123053623/123120543/123162645/123181820/123130282/123103237/123061942/123079047	13	123087086/123169796/123190998/123103029/101290612/123095904/123080746/123120307/123085525/123111217/123180731/123055148/101290611
BP	GO:0005984	disaccharide metabolic process	15/1675	79/19078	0.00332413	0.0346559	123092190/123052082/123097521/123085854/100270668/123063345/123145030/542972/123085122/123168174/123182644/123127938/123187938/123063086/123049002	LOC123092190/LOC123052082/LOC123097521/LOC123085854/LOC100270668/LOC123063345/LOC123145030/LOC542972/LOC123085122/LOC123168174/LOC123182644/LOC123127938/LOC123187938/LOC123063086/LOC123049002	15	13	123092190/123052082/123097521/123085854/123145030/542972/123085122/123168174/123182644/123127938/123187938/123063086/123049002	2	100270668/123063345
BP	GO:0009791	post-embryonic development	7/1675	24/19078	0.00360983	0.0368504	123167003/123083460/123148855/123156713/123106932/123150986/123164598	LOC123167003/LOC123083460/LOC123148855/LOC123156713/LOC123106932/LOC123150986/LOC123164598	7	7	123167003/123083460/123148855/123156713/123106932/123150986/123164598	0
BP	GO:0006820	anion transport	23/1675	149/19078	0.00548555	0.0548555	123079164/543388/123070428/123113787/123078872/123053389/123045549/123105489/123098407/123163773/123143623/123123272/123048932/123070775/123150081/123150021/123189297/123136113/123132086/123130649/100136990/123063357/123144698	LOC123079164/LOC543388/LOC123070428/LOC123113787/LOC123078872/LOC123053389/LOC123045549/LOC123105489/LOC123098407/LOC123163773/LOC123143623/LOC123123272/LOC123048932/LOC123070775/LOC123150081/LOC123150021/LOC123189297/LOC123136113/LOC123132086/LOC123130649/LOC100136990/LOC123063357/LOC123144698	23	12	123079164/543388/123053389/123045549/123098407/123048932/123070775/123150081/123189297/123130649/100136990/123144698	11	123070428/123113787/123078872/123105489/123163773/123143623/123123272/123150021/123136113/123132086/123063357
BP	GO:1901607	alpha-amino acid biosynthetic process	20/1675	124/19078	0.00564752	0.0553457	123119218/123085324/123102066/123110172/123098400/123049559/123120509/123098015/123041365/123092717/123189133/123090862/123103220/123090570/123093127/123092924/123104876/123113163/606323/123084953	LOC123119218/LOC123085324/LOC123102066/LOC123110172/LOC123098400/LOC123049559/LOC123120509/LOC123098015/LOC123041365/LOC123092717/LOC123189133/LOC123090862/LOC123103220/LOC123090570/LOC123093127/LOC123092924/LOC123104876/LOC123113163/LOC606323/LOC123084953	20	13	123119218/123102066/123110172/123120509/123041365/123189133/123090862/123103220/123090570/123092924/123104876/123113163/606323	7	123085324/123098400/123049559/123098015/123092717/123093127/123084953
BP	GO:1901605	alpha-amino acid metabolic process	24/1675	166/19078	0.0103861	0.0997882	123119218/123085324/123102066/123110172/123098400/123113925/123123214/123049559/123120509/123098015/123041365/123092717/123189133/123071460/123090862/123103220/123090570/123093127/123092924/123104876/123113163/606323/123088644/123084953	LOC123119218/LOC123085324/LOC123102066/LOC123110172/LOC123098400/LOC123113925/LOC123123214/LOC123049559/LOC123120509/LOC123098015/LOC123041365/LOC123092717/LOC123189133/LOC123071460/LOC123090862/LOC123103220/LOC123090570/LOC123093127/LOC123092924/LOC123104876/LOC123113163/LOC606323/LOC123088644/LOC123084953	24	17	123119218/123102066/123110172/123113925/123123214/123120509/123041365/123189133/123071460/123090862/123103220/123090570/123092924/123104876/123113163/606323/123088644	7	123085324/123098400/123049559/123098015/123092717/123093127/123084953
BP	GO:0009311	oligosaccharide metabolic process	15/1675	91/19078	0.0125802	0.118544	123092190/123052082/123097521/123085854/100270668/123063345/123145030/542972/123085122/123168174/123182644/123127938/123187938/123063086/123049002	LOC123092190/LOC123052082/LOC123097521/LOC123085854/LOC100270668/LOC123063345/LOC123145030/LOC542972/LOC123085122/LOC123168174/LOC123182644/LOC123127938/LOC123187938/LOC123063086/LOC123049002	15	13	123092190/123052082/123097521/123085854/123145030/542972/123085122/123168174/123182644/123127938/123187938/123063086/123049002	2	100270668/123063345
BP	GO:0009066	aspartate family amino acid metabolic process	8/1675	37/19078	0.0133718	0.123626	123119218/123102066/123110172/123113925/123120509/123103220/123090570/606323	LOC123119218/LOC123102066/LOC123110172/LOC123113925/LOC123120509/LOC123103220/LOC123090570/LOC606323	8	8	123119218/123102066/123110172/123113925/123120509/123103220/123090570/606323	0
BP	GO:0006558	L-phenylalanine metabolic process	6/1675	24/19078	0.0153626	0.136867	123049559/123041365/123189133/123104876/123113163/123088644	LOC123049559/LOC123041365/LOC123189133/LOC123104876/LOC123113163/LOC123088644	6	5	123041365/123189133/123104876/123113163/123088644	1	123049559
BP	GO:1902221	erythrose 4-phosphate/phosphoenolpyruvate family amino acid metabolic process	6/1675	24/19078	0.0153626	0.136867	123049559/123041365/123189133/123104876/123113163/123088644	LOC123049559/LOC123041365/LOC123189133/LOC123104876/LOC123113163/LOC123088644	6	5	123041365/123189133/123104876/123113163/123088644	1	123049559
BP	GO:0008652	cellular amino acid biosynthetic process	21/1675	146/19078	0.0166475	0.144783	123119218/123085324/123102066/123110172/123098400/123049559/123120509/123098015/123041365/123092717/123189133/123090862/123103220/123090570/123093127/123092924/123104876/123122915/123113163/606323/123084953	LOC123119218/LOC123085324/LOC123102066/LOC123110172/LOC123098400/LOC123049559/LOC123120509/LOC123098015/LOC123041365/LOC123092717/LOC123189133/LOC123090862/LOC123103220/LOC123090570/LOC123093127/LOC123092924/LOC123104876/LOC123122915/LOC123113163/LOC606323/LOC123084953	21	14	123119218/123102066/123110172/123120509/123041365/123189133/123090862/123103220/123090570/123092924/123104876/123122915/123113163/606323	7	123085324/123098400/123049559/123098015/123092717/123093127/123084953
BP	GO:0015977	carbon fixation	5/1675	18/19078	0.0168421	0.144783	123060630/123164058/123156484/123147894/123069406	LOC123060630/LOC123164058/LOC123156484/LOC123147894/LOC123069406	5	0		5	123060630/123164058/123156484/123147894/123069406
BP	GO:0006073	cellular glucan metabolic process	23/1675	169/19078	0.0231545	0.189095	123044580/123044576/123068318/123052445/123049142/123145161/123188320/123148738/123185146/123121827/123147783/123076710/123044579/123168533/123168995/123164298/123158976/123164299/123153374/123162241/606356/123158862/123167634	LOC123044580/LOC123044576/LOC123068318/LOC123052445/LOC123049142/LOC123145161/LOC123188320/LOC123148738/LOC123185146/LOC123121827/LOC123147783/LOC123076710/LOC123044579/LOC123168533/LOC123168995/LOC123164298/LOC123158976/LOC123164299/LOC123153374/LOC123162241/LOC606356/LOC123158862/LOC123167634	23	20	123044580/123044576/123052445/123049142/123145161/123188320/123148738/123185146/123147783/123044579/123168533/123168995/123164298/123158976/123164299/123153374/123162241/606356/123158862/123167634	3	123068318/123121827/123076710
BP	GO:0044042	glucan metabolic process	23/1675	169/19078	0.0231545	0.189095	123044580/123044576/123068318/123052445/123049142/123145161/123188320/123148738/123185146/123121827/123147783/123076710/123044579/123168533/123168995/123164298/123158976/123164299/123153374/123162241/606356/123158862/123167634	LOC123044580/LOC123044576/LOC123068318/LOC123052445/LOC123049142/LOC123145161/LOC123188320/LOC123148738/LOC123185146/LOC123121827/LOC123147783/LOC123076710/LOC123044579/LOC123168533/LOC123168995/LOC123164298/LOC123158976/LOC123164299/LOC123153374/LOC123162241/LOC606356/LOC123158862/LOC123167634	23	20	123044580/123044576/123052445/123049142/123145161/123188320/123148738/123185146/123147783/123044579/123168533/123168995/123164298/123158976/123164299/123153374/123162241/606356/123158862/123167634	3	123068318/123121827/123076710
BP	GO:0044264	cellular polysaccharide metabolic process	23/1675	169/19078	0.0231545	0.189095	123044580/123044576/123068318/123052445/123049142/123145161/123188320/123148738/123185146/123121827/123147783/123076710/123044579/123168533/123168995/123164298/123158976/123164299/123153374/123162241/606356/123158862/123167634	LOC123044580/LOC123044576/LOC123068318/LOC123052445/LOC123049142/LOC123145161/LOC123188320/LOC123148738/LOC123185146/LOC123121827/LOC123147783/LOC123076710/LOC123044579/LOC123168533/LOC123168995/LOC123164298/LOC123158976/LOC123164299/LOC123153374/LOC123162241/LOC606356/LOC123158862/LOC123167634	23	20	123044580/123044576/123052445/123049142/123145161/123188320/123148738/123185146/123147783/123044579/123168533/123168995/123164298/123158976/123164299/123153374/123162241/606356/123158862/123167634	3	123068318/123121827/123076710
BP	GO:0005985	sucrose metabolic process	7/1675	34/19078	0.0259858	0.205371	123092190/123052082/123097521/123085854/542972/123187938/123063086	LOC123092190/LOC123052082/LOC123097521/LOC123085854/LOC542972/LOC123187938/LOC123063086	7	7	123092190/123052082/123097521/123085854/542972/123187938/123063086	0
BP	GO:0009067	aspartate family amino acid biosynthetic process	7/1675	34/19078	0.0259858	0.205371	123119218/123102066/123110172/123120509/123103220/123090570/606323	LOC123119218/LOC123102066/LOC123110172/LOC123120509/LOC123103220/LOC123090570/LOC606323	7	7	123119218/123102066/123110172/123120509/123103220/123090570/606323	0
BP	GO:0019321	pentose metabolic process	4/1675	14/19078	0.0289822	0.218482	123091621/123097626/123111290/123085717	LOC123091621/LOC123097626/LOC123111290/LOC123085717	4	0		4	123091621/123097626/123111290/123085717
BP	GO:0019566	arabinose metabolic process	4/1675	14/19078	0.0289822	0.218482	123091621/123097626/123111290/123085717	LOC123091621/LOC123097626/LOC123111290/LOC123085717	4	0		4	123091621/123097626/123111290/123085717
BP	GO:0046373	L-arabinose metabolic process	4/1675	14/19078	0.0289822	0.218482	123091621/123097626/123111290/123085717	LOC123091621/LOC123097626/LOC123111290/LOC123085717	4	0		4	123091621/123097626/123111290/123085717
BP	GO:0009094	L-phenylalanine biosynthetic process	5/1675	21/19078	0.0321258	0.23495	123049559/123041365/123189133/123104876/123113163	LOC123049559/LOC123041365/LOC123189133/LOC123104876/LOC123113163	5	4	123041365/123189133/123104876/123113163	1	123049559
BP	GO:1902223	erythrose 4-phosphate/phosphoenolpyruvate family amino acid biosynthetic process	5/1675	21/19078	0.0321258	0.23495	123049559/123041365/123189133/123104876/123113163	LOC123049559/LOC123041365/LOC123189133/LOC123104876/LOC123113163	5	4	123041365/123189133/123104876/123113163	1	123049559
BP	GO:0009116	nucleoside metabolic process	10/1675	60/19078	0.0349767	0.241389	123045960/123062759/543100/123071583/123079922/123189694/123060798/123078820/123061734/123046986	LOC123045960/LOC123062759/LOC543100/LOC123071583/LOC123079922/LOC123189694/LOC123060798/LOC123078820/LOC123061734/LOC123046986	10	4	123060798/123078820/123061734/123046986	6	123045960/123062759/543100/123071583/123079922/123189694
BP	GO:0071804	cellular potassium ion transport	10/1675	60/19078	0.0349767	0.241389	123121414/123111848/123152478/123159986/123141760/123166399/123134486/123121696/123145391/123150115	LOC123121414/LOC123111848/LOC123152478/LOC123159986/LOC123141760/LOC123166399/LOC123134486/LOC123121696/LOC123145391/LOC123150115	10	9	123121414/123111848/123159986/123141760/123166399/123134486/123121696/123145391/123150115	1	123152478
BP	GO:0071805	potassium ion transmembrane transport	10/1675	60/19078	0.0349767	0.241389	123121414/123111848/123152478/123159986/123141760/123166399/123134486/123121696/123145391/123150115	LOC123121414/LOC123111848/LOC123152478/LOC123159986/LOC123141760/LOC123166399/LOC123134486/LOC123121696/LOC123145391/LOC123150115	10	9	123121414/123111848/123159986/123141760/123166399/123134486/123121696/123145391/123150115	1	123152478
BP	GO:1901657	glycosyl compound metabolic process	10/1675	60/19078	0.0349767	0.241389	123045960/123062759/543100/123071583/123079922/123189694/123060798/123078820/123061734/123046986	LOC123045960/LOC123062759/LOC543100/LOC123071583/LOC123079922/LOC123189694/LOC123060798/LOC123078820/LOC123061734/LOC123046986	10	4	123060798/123078820/123061734/123046986	6	123045960/123062759/543100/123071583/123079922/123189694
BP	GO:0030001	metal ion transport	42/1675	361/19078	0.0367291	0.249962	123121414/123166012/123080442/123065334/123063255/123121908/123190924/123111848/123151620/123130089/123152478/123159986/123187211/123051252/123116391/123141760/123058342/123166399/123072819/123182347/123072175/123134486/123099244/123055066/123102567/123121696/123145391/123150115/123045337/123050512/123140870/123093043/123091680/123043382/123182620/123072820/123084907/123184889/123094594/123098439…	LOC123121414/LOC123166012/LOC123080442/LOC123065334/LOC123063255/LOC123121908/LOC123190924/LOC123111848/LOC123151620/LOC123130089/LOC123152478/LOC123159986/LOC123187211/LOC123051252/LOC123116391/LOC123141760/LOC123058342/LOC123166399/LOC123072819/LOC123182347/LOC123072175/LOC123134486/LOC123099244/LOC123055066/LOC123102567/LOC123121696/LOC123145391/LOC123150115/LOC123045337/LOC123050512/LOC123140…	42	34	123121414/123080442/123065334/123063255/123121908/123190924/123111848/123130089/123159986/123187211/123051252/123116391/123141760/123058342/123166399/123072819/123072175/123134486/123099244/123055066/123121696/123145391/123150115/123045337/123050512/123140870/123091680/123043382/123182620/123072820/123084907/123094594/123098439/123048217	8	123166012/123151620/123152478/123182347/123102567/123093043/123184889/123148024
BP	GO:0006631	fatty acid metabolic process	18/1675	131/19078	0.0377611	0.253465	123180032/123105435/123168642/123168027/123086141/123102951/123045284/123148128/123139638/123099312/123115158/123111108/123146095/100270666/123085149/123098215/123161912/123068651	LOC123180032/LOC123105435/LOC123168642/LOC123168027/LOC123086141/LOC123102951/LOC123045284/LOC123148128/LOC123139638/LOC123099312/LOC123115158/LOC123111108/LOC123146095/LOC100270666/LOC123085149/LOC123098215/LOC123161912/LOC123068651	18	14	123168642/123168027/123086141/123045284/123148128/123139638/123099312/123115158/123146095/100270666/123085149/123098215/123161912/123068651	4	123180032/123105435/123102951/123111108
BP	GO:0005991	trehalose metabolic process	8/1675	45/19078	0.0401859	0.266096	100270668/123063345/123145030/123085122/123168174/123182644/123127938/123049002	LOC100270668/LOC123063345/LOC123145030/LOC123085122/LOC123168174/LOC123182644/LOC123127938/LOC123049002	8	6	123145030/123085122/123168174/123182644/123127938/123049002	2	100270668/123063345
BP	GO:0002376	immune system process	3/1675	10/19078	0.050728	0.279289	123169410/123139793/123169411	LOC123169410/LOC123139793/LOC123169411	3	3	123169410/123139793/123169411	0
BP	GO:0002682	regulation of immune system process	3/1675	10/19078	0.050728	0.279289	123169410/123139793/123169411	LOC123169410/LOC123139793/LOC123169411	3	3	123169410/123139793/123169411	0
BP	GO:0002831	regulation of response to biotic stimulus	3/1675	10/19078	0.050728	0.279289	123169410/123139793/123169411	LOC123169410/LOC123139793/LOC123169411	3	3	123169410/123139793/123169411	0
BP	GO:0006750	glutathione biosynthetic process	3/1675	10/19078	0.050728	0.279289	123148878/123167324/123158946	LOC123148878/LOC123167324/LOC123158946	3	3	123148878/123167324/123158946	0
BP	GO:0006955	immune response	3/1675	10/19078	0.050728	0.279289	123169410/123139793/123169411	LOC123169410/LOC123139793/LOC123169411	3	3	123169410/123139793/123169411	0
BP	GO:0009627	systemic acquired resistance	3/1675	10/19078	0.050728	0.279289	123169410/123139793/123169411	LOC123169410/LOC123139793/LOC123169411	3	3	123169410/123139793/123169411	0
BP	GO:0009814	defense response, incompatible interaction	3/1675	10/19078	0.050728	0.279289	123169410/123139793/123169411	LOC123169410/LOC123139793/LOC123169411	3	3	123169410/123139793/123169411	0
BP	GO:0010112	regulation of systemic acquired resistance	3/1675	10/19078	0.050728	0.279289	123169410/123139793/123169411	LOC123169410/LOC123139793/LOC123169411	3	3	123169410/123139793/123169411	0
BP	GO:0019184	nonribosomal peptide biosynthetic process	3/1675	10/19078	0.050728	0.279289	123148878/123167324/123158946	LOC123148878/LOC123167324/LOC123158946	3	3	123148878/123167324/123158946	0
BP	GO:0031347	regulation of defense response	3/1675	10/19078	0.050728	0.279289	123169410/123139793/123169411	LOC123169410/LOC123139793/LOC123169411	3	3	123169410/123139793/123169411	0
BP	GO:0032101	regulation of response to external stimulus	3/1675	10/19078	0.050728	0.279289	123169410/123139793/123169411	LOC123169410/LOC123139793/LOC123169411	3	3	123169410/123139793/123169411	0
BP	GO:0043900	regulation of multi-organism process	3/1675	10/19078	0.050728	0.279289	123169410/123139793/123169411	LOC123169410/LOC123139793/LOC123169411	3	3	123169410/123139793/123169411	0
BP	GO:0045087	innate immune response	3/1675	10/19078	0.050728	0.279289	123169410/123139793/123169411	LOC123169410/LOC123139793/LOC123169411	3	3	123169410/123139793/123169411	0
BP	GO:0045088	regulation of innate immune response	3/1675	10/19078	0.050728	0.279289	123169410/123139793/123169411	LOC123169410/LOC123139793/LOC123169411	3	3	123169410/123139793/123169411	0
BP	GO:0050776	regulation of immune response	3/1675	10/19078	0.050728	0.279289	123169410/123139793/123169411	LOC123169410/LOC123139793/LOC123169411	3	3	123169410/123139793/123169411	0
BP	GO:0008272	sulfate transport	5/1675	24/19078	0.0539989	0.287644	123079164/123098407/123070775/123150081/100136990	LOC123079164/LOC123098407/LOC123070775/LOC123150081/LOC100136990	5	5	123079164/123098407/123070775/123150081/100136990	0
BP	GO:0072348	sulfur compound transport	5/1675	24/19078	0.0539989	0.287644	123079164/123098407/123070775/123150081/100136990	LOC123079164/LOC123098407/LOC123070775/LOC123150081/LOC100136990	5	5	123079164/123098407/123070775/123150081/100136990	0
BP	GO:0006099	tricarboxylic acid cycle	4/1675	17/19078	0.0558757	0.287644	123060630/123164058/123156484/123147894	LOC123060630/LOC123164058/LOC123156484/LOC123147894	4	0		4	123060630/123164058/123156484/123147894
BP	GO:0006101	citrate metabolic process	4/1675	17/19078	0.0558757	0.287644	123060630/123164058/123156484/123147894	LOC123060630/LOC123164058/LOC123156484/LOC123147894	4	0		4	123060630/123164058/123156484/123147894
BP	GO:0009060	aerobic respiration	4/1675	17/19078	0.0558757	0.287644	123060630/123164058/123156484/123147894	LOC123060630/LOC123164058/LOC123156484/LOC123147894	4	0		4	123060630/123164058/123156484/123147894
BP	GO:0016999	antibiotic metabolic process	4/1675	17/19078	0.0558757	0.287644	123060630/123164058/123156484/123147894	LOC123060630/LOC123164058/LOC123156484/LOC123147894	4	0		4	123060630/123164058/123156484/123147894
BP	GO:0016226	iron-sulfur cluster assembly	6/1675	32/19078	0.0569417	0.287644	123181803/123177012/123099419/123086676/123091299/123062261	LOC123181803/LOC123177012/LOC123099419/LOC123086676/LOC123091299/LOC123062261	6	6	123181803/123177012/123099419/123086676/123091299/123062261	0
BP	GO:0031163	metallo-sulfur cluster assembly	6/1675	32/19078	0.0569417	0.287644	123181803/123177012/123099419/123086676/123091299/123062261	LOC123181803/LOC123177012/LOC123099419/LOC123086676/LOC123091299/LOC123062261	6	6	123181803/123177012/123099419/123086676/123091299/123062261	0
BP	GO:0006813	potassium ion transport	10/1675	66/19078	0.061154	0.303257	123121414/123111848/123152478/123159986/123141760/123166399/123134486/123121696/123145391/123150115	LOC123121414/LOC123111848/LOC123152478/LOC123159986/LOC123141760/LOC123166399/LOC123134486/LOC123121696/LOC123145391/LOC123150115	10	9	123121414/123111848/123159986/123141760/123166399/123134486/123121696/123145391/123150115	1	123152478
BP	GO:0032787	monocarboxylic acid metabolic process	31/1675	265/19078	0.0612703	0.303257	123180032/123128593/123105435/123145716/123053591/123045718/123120509/123168642/123079989/123168027/123167365/123086141/123102951/123045284/123148128/123182687/123189489/123139638/123099312/123115158/123103220/123111108/123146095/100270666/123085149/606323/123090631/123053707/123098215/123161912/123068651	LOC123180032/LOC123128593/LOC123105435/LOC123145716/LOC123053591/LOC123045718/LOC123120509/LOC123168642/LOC123079989/LOC123168027/LOC123167365/LOC123086141/LOC123102951/LOC123045284/LOC123148128/LOC123182687/LOC123189489/LOC123139638/LOC123099312/LOC123115158/LOC123103220/LOC123111108/LOC123146095/LOC100270666/LOC123085149/LOC606323/LOC123090631/LOC123053707/LOC123098215/LOC123161912/LOC123068651	31	25	123128593/123145716/123053591/123045718/123120509/123168642/123079989/123168027/123086141/123045284/123148128/123182687/123189489/123139638/123099312/123115158/123103220/123146095/100270666/123085149/606323/123053707/123098215/123161912/123068651	6	123180032/123105435/123167365/123102951/123111108/123090631
BP	GO:0009767	photosynthetic electron transport chain	5/1675	25/19078	0.0628114	0.307776	novel.2336/123097283/novel.1502/novel.2337/novel.1303	-/LOC123097283/-/-/-	5	0		5	novel.2336/123097283/novel.1502/novel.2337/novel.1303
BP	GO:0043545	molybdopterin cofactor metabolic process	3/1675	11/19078	0.0653217	0.31327	123121368/123116104/123046986	LOC123121368/LOC123116104/LOC123046986	3	3	123121368/123116104/123046986	0
BP	GO:0051189	prosthetic group metabolic process	3/1675	11/19078	0.0653217	0.31327	123121368/123116104/123046986	LOC123121368/LOC123116104/LOC123046986	3	3	123121368/123116104/123046986	0
BP	GO:0030243	cellulose metabolic process	10/1675	67/19078	0.06649	0.31327	123044580/123044576/123068318/123052445/123049142/123188320/123185146/123121827/123076710/123044579	LOC123044580/LOC123044576/LOC123068318/LOC123052445/LOC123049142/LOC123188320/LOC123185146/LOC123121827/LOC123076710/LOC123044579	10	7	123044580/123044576/123052445/123049142/123188320/123185146/123044579	3	123068318/123121827/123076710
BP	GO:0030244	cellulose biosynthetic process	10/1675	67/19078	0.06649	0.31327	123044580/123044576/123068318/123052445/123049142/123188320/123185146/123121827/123076710/123044579	LOC123044580/LOC123044576/LOC123068318/LOC123052445/LOC123049142/LOC123188320/LOC123185146/LOC123121827/LOC123076710/LOC123044579	10	7	123044580/123044576/123052445/123049142/123188320/123185146/123044579	3	123068318/123121827/123076710
BP	GO:0051704	multi-organism process	28/1675	239/19078	0.0712237	0.332377	123191268/123080931/123063611/123072755/123050578/123081811/123042685/123052440/123071023/123050480/123066869/123182519/123114278/123190963/123186545/123054748/123096591/123061459/123169410/123139793/123113145/123169411/123047261/123065514/123046012/123061709/123138797/123071765	LOC123191268/LOC123080931/LOC123063611/LOC123072755/LOC123050578/LOC123081811/LOC123042685/LOC123052440/LOC123071023/LOC123050480/LOC123066869/LOC123182519/LOC123114278/LOC123190963/LOC123186545/LOC123054748/LOC123096591/LOC123061459/LOC123169410/LOC123139793/LOC123113145/LOC123169411/LOC123047261/LOC123065514/LOC123046012/LOC123061709/LOC123138797/LOC123071765	28	18	123080931/123063611/123072755/123050578/123081811/123042685/123052440/123071023/123182519/123114278/123186545/123054748/123096591/123061459/123169410/123139793/123169411/123138797	10	123191268/123050480/123066869/123190963/123113145/123047261/123065514/123046012/123061709/123071765
BP	GO:0005996	monosaccharide metabolic process	10/1675	68/19078	0.0721142	0.333176	123092719/123098016/123085323/123091621/123097626/123111290/123085717/123092239/123123515/123053692	LOC123092719/LOC123098016/LOC123085323/LOC123091621/LOC123097626/LOC123111290/LOC123085717/LOC123092239/LOC123123515/LOC123053692	10	5	123092719/123098016/123085323/123092239/123053692	5	123091621/123097626/123111290/123085717/123123515
BP	GO:0016053	organic acid biosynthetic process	42/1675	381/19078	0.0738742	0.333176	123180032/123119218/123128593/123105435/123085324/123102066/123110172/123145716/123098400/123053591/123045718/123049559/123120509/123079989/123098015/123168027/123167365/123086141/123148128/123182687/123189489/123041365/123139638/123092717/123189133/123099312/123090862/123115158/123103220/123090570/123093127/123092924/123104876/123122915/123146095/100270666/123113163/123085149/606323/123090631/12…	LOC123180032/LOC123119218/LOC123128593/LOC123105435/LOC123085324/LOC123102066/LOC123110172/LOC123145716/LOC123098400/LOC123053591/LOC123045718/LOC123049559/LOC123120509/LOC123079989/LOC123098015/LOC123168027/LOC123167365/LOC123086141/LOC123148128/LOC123182687/LOC123189489/LOC123041365/LOC123139638/LOC123092717/LOC123189133/LOC123099312/LOC123090862/LOC123115158/LOC123103220/LOC123090570/LOC123093…	42	31	123119218/123128593/123102066/123110172/123145716/123053591/123045718/123120509/123079989/123168027/123086141/123148128/123182687/123189489/123041365/123139638/123189133/123099312/123090862/123115158/123103220/123090570/123092924/123104876/123122915/123146095/100270666/123113163/123085149/606323/123098215	11	123180032/123105435/123085324/123098400/123049559/123098015/123167365/123092717/123093127/123090631/123084953
BP	GO:0046394	carboxylic acid biosynthetic process	42/1675	381/19078	0.0738742	0.333176	123180032/123119218/123128593/123105435/123085324/123102066/123110172/123145716/123098400/123053591/123045718/123049559/123120509/123079989/123098015/123168027/123167365/123086141/123148128/123182687/123189489/123041365/123139638/123092717/123189133/123099312/123090862/123115158/123103220/123090570/123093127/123092924/123104876/123122915/123146095/100270666/123113163/123085149/606323/123090631/12…	LOC123180032/LOC123119218/LOC123128593/LOC123105435/LOC123085324/LOC123102066/LOC123110172/LOC123145716/LOC123098400/LOC123053591/LOC123045718/LOC123049559/LOC123120509/LOC123079989/LOC123098015/LOC123168027/LOC123167365/LOC123086141/LOC123148128/LOC123182687/LOC123189489/LOC123041365/LOC123139638/LOC123092717/LOC123189133/LOC123099312/LOC123090862/LOC123115158/LOC123103220/LOC123090570/LOC123093…	42	31	123119218/123128593/123102066/123110172/123145716/123053591/123045718/123120509/123079989/123168027/123086141/123148128/123182687/123189489/123041365/123139638/123189133/123099312/123090862/123115158/123103220/123090570/123092924/123104876/123122915/123146095/100270666/123113163/123085149/606323/123098215	11	123180032/123105435/123085324/123098400/123049559/123098015/123167365/123092717/123093127/123090631/123084953
BP	GO:0006633	fatty acid biosynthetic process	12/1675	87/19078	0.0775332	0.333176	123180032/123105435/123168027/123086141/123148128/123139638/123099312/123115158/123146095/100270666/123085149/123098215	LOC123180032/LOC123105435/LOC123168027/LOC123086141/LOC123148128/LOC123139638/LOC123099312/LOC123115158/LOC123146095/LOC100270666/LOC123085149/LOC123098215	12	10	123168027/123086141/123148128/123139638/123099312/123115158/123146095/100270666/123085149/123098215	2	123180032/123105435
BP	GO:0006094	gluconeogenesis	3/1675	12/19078	0.0815942	0.333176	123092719/123098016/123085323	LOC123092719/LOC123098016/LOC123085323	3	3	123092719/123098016/123085323	0
BP	GO:0006534	cysteine metabolic process	3/1675	12/19078	0.0815942	0.333176	123098400/123093127/123084953	LOC123098400/LOC123093127/LOC123084953	3	0		3	123098400/123093127/123084953
BP	GO:0006535	cysteine biosynthetic process from serine	3/1675	12/19078	0.0815942	0.333176	123098400/123093127/123084953	LOC123098400/LOC123093127/LOC123084953	3	0		3	123098400/123093127/123084953
BP	GO:0006563	L-serine metabolic process	3/1675	12/19078	0.0815942	0.333176	123098400/123093127/123084953	LOC123098400/LOC123093127/LOC123084953	3	0		3	123098400/123093127/123084953
BP	GO:0006835	dicarboxylic acid transport	3/1675	12/19078	0.0815942	0.333176	543388/123163773/123150021	LOC543388/LOC123163773/LOC123150021	3	1	543388	2	123163773/123150021
BP	GO:0009070	serine family amino acid biosynthetic process	3/1675	12/19078	0.0815942	0.333176	123098400/123093127/123084953	LOC123098400/LOC123093127/LOC123084953	3	0		3	123098400/123093127/123084953
BP	GO:0015740	C4-dicarboxylate transport	3/1675	12/19078	0.0815942	0.333176	543388/123163773/123150021	LOC543388/LOC123163773/LOC123150021	3	1	543388	2	123163773/123150021
BP	GO:0015743	malate transport	3/1675	12/19078	0.0815942	0.333176	543388/123163773/123150021	LOC543388/LOC123163773/LOC123150021	3	1	543388	2	123163773/123150021
BP	GO:0019319	hexose biosynthetic process	3/1675	12/19078	0.0815942	0.333176	123092719/123098016/123085323	LOC123092719/LOC123098016/LOC123085323	3	3	123092719/123098016/123085323	0
BP	GO:0019344	cysteine biosynthetic process	3/1675	12/19078	0.0815942	0.333176	123098400/123093127/123084953	LOC123098400/LOC123093127/LOC123084953	3	0		3	123098400/123093127/123084953
BP	GO:0046364	monosaccharide biosynthetic process	3/1675	12/19078	0.0815942	0.333176	123092719/123098016/123085323	LOC123092719/LOC123098016/LOC123085323	3	3	123092719/123098016/123085323	0
BP	GO:0009308	amine metabolic process	14/1675	107/19078	0.0850673	0.344487	123045745/123181824/123123214/123165939/123130341/123084804/123149681/123043469/123071460/123046279/123189472/123158636/123079353/123062219	LOC123045745/LOC123181824/LOC123123214/LOC123165939/LOC123130341/LOC123084804/LOC123149681/LOC123043469/LOC123071460/LOC123046279/LOC123189472/LOC123158636/LOC123079353/LOC123062219	14	5	123123214/123084804/123043469/123071460/123189472	9	123045745/123181824/123165939/123130341/123149681/123046279/123158636/123079353/123062219
BP	GO:0006814	sodium ion transport	4/1675	20/19078	0.0924656	0.348035	123166012/123065334/123121908/123116391	LOC123166012/LOC123065334/LOC123121908/LOC123116391	4	3	123065334/123121908/123116391	1	123166012
BP	GO:0009664	plant-type cell wall organization	5/1675	28/19078	0.0937562	0.348035	123113352/543124/123105056/123085635/123097711	LOC123113352/LOC543124/LOC123105056/LOC123085635/LOC123097711	5	5	123113352/543124/123105056/123085635/123097711	0
BP	GO:0009832	plant-type cell wall biogenesis	5/1675	28/19078	0.0937562	0.348035	123113352/543124/123105056/123085635/123097711	LOC123113352/LOC543124/LOC123105056/LOC123085635/LOC123097711	5	5	123113352/543124/123105056/123085635/123097711	0
BP	GO:0010215	cellulose microfibril organization	5/1675	28/19078	0.0937562	0.348035	123113352/543124/123105056/123085635/123097711	LOC123113352/LOC543124/LOC123105056/LOC123085635/LOC123097711	5	5	123113352/543124/123105056/123085635/123097711	0
BP	GO:0016049	cell growth	5/1675	28/19078	0.0937562	0.348035	123113352/543124/123105056/123085635/123097711	LOC123113352/LOC543124/LOC123105056/LOC123085635/LOC123097711	5	5	123113352/543124/123105056/123085635/123097711	0
BP	GO:0030198	extracellular matrix organization	5/1675	28/19078	0.0937562	0.348035	123113352/543124/123105056/123085635/123097711	LOC123113352/LOC543124/LOC123105056/LOC123085635/LOC123097711	5	5	123113352/543124/123105056/123085635/123097711	0
BP	GO:0040007	growth	5/1675	28/19078	0.0937562	0.348035	123113352/543124/123105056/123085635/123097711	LOC123113352/LOC543124/LOC123105056/LOC123085635/LOC123097711	5	5	123113352/543124/123105056/123085635/123097711	0
BP	GO:0043062	extracellular structure organization	5/1675	28/19078	0.0937562	0.348035	123113352/543124/123105056/123085635/123097711	LOC123113352/LOC543124/LOC123105056/LOC123085635/LOC123097711	5	5	123113352/543124/123105056/123085635/123097711	0
BP	GO:0070726	cell wall assembly	5/1675	28/19078	0.0937562	0.348035	123113352/543124/123105056/123085635/123097711	LOC123113352/LOC543124/LOC123105056/LOC123085635/LOC123097711	5	5	123113352/543124/123105056/123085635/123097711	0
BP	GO:0071668	plant-type cell wall assembly	5/1675	28/19078	0.0937562	0.348035	123113352/543124/123105056/123085635/123097711	LOC123113352/LOC543124/LOC123105056/LOC123085635/LOC123097711	5	5	123113352/543124/123105056/123085635/123097711	0
BP	GO:0071669	plant-type cell wall organization or biogenesis	5/1675	28/19078	0.0937562	0.348035	123113352/543124/123105056/123085635/123097711	LOC123113352/LOC543124/LOC123105056/LOC123085635/LOC123097711	5	5	123113352/543124/123105056/123085635/123097711	0
BP	GO:0080134	regulation of response to stress	3/1675	13/19078	0.0994089	0.366243	123169410/123139793/123169411	LOC123169410/LOC123139793/LOC123169411	3	3	123169410/123139793/123169411	0
BP	GO:1901136	carbohydrate derivative catabolic process	9/1675	64/19078	0.105763	0.386745	123117018/123125582/123157472/123121979/123053755/542839/123078820/123061734/123105823	LOC123117018/LOC123125582/LOC123157472/LOC123121979/LOC123053755/LOC542839/LOC123078820/LOC123061734/LOC123105823	9	9	123117018/123125582/123157472/123121979/123053755/542839/123078820/123061734/123105823	0
BP	GO:0008610	lipid biosynthetic process	36/1675	332/19078	0.109198	0.396347	123091300/123096278/123180032/123086677/123155757/123181005/123105435/123181004/123163916/123120849/123065590/123181992/123181575/123168027/100415864/123086141/123148128/100192181/123068299/123139638/123099312/123140708/123055375/123057498/123137670/123115158/123127385/123145055/123144080/123146095/100270666/123165924/123085149/123132497/123096733/123098215	LOC123091300/LOC123096278/LOC123180032/LOC123086677/LOC123155757/LOC123181005/LOC123105435/LOC123181004/LOC123163916/LOC123120849/LOC123065590/LOC123181992/LOC123181575/LOC123168027/LOC100415864/LOC123086141/LOC123148128/LOC100192181/LOC123068299/LOC123139638/LOC123099312/LOC123140708/LOC123055375/LOC123057498/LOC123137670/LOC123115158/LOC123127385/LOC123145055/LOC123144080/LOC123146095/LOC100270…	36	29	123091300/123096278/123086677/123155757/123181005/123181004/123163916/123120849/123065590/123181575/123168027/100415864/123086141/123148128/100192181/123139638/123099312/123137670/123115158/123127385/123145055/123144080/123146095/100270666/123165924/123085149/123132497/123096733/123098215	7	123180032/123105435/123181992/123068299/123140708/123055375/123057498
BP	GO:0009095	aromatic amino acid family biosynthetic process, prephenate pathway	5/1675	30/19078	0.117972	0.424248	123049559/123041365/123189133/123104876/123113163	LOC123049559/LOC123041365/LOC123189133/LOC123104876/LOC123113163	5	4	123041365/123189133/123104876/123113163	1	123049559
BP	GO:0009069	serine family amino acid metabolic process	3/1675	14/19078	0.118616	0.424248	123098400/123093127/123084953	LOC123098400/LOC123093127/LOC123084953	3	0		3	123098400/123093127/123084953
BP	GO:0072330	monocarboxylic acid biosynthetic process	24/1675	215/19078	0.132491	0.47044	123180032/123128593/123105435/123145716/123053591/123045718/123120509/123079989/123168027/123167365/123086141/123148128/123182687/123189489/123139638/123099312/123115158/123103220/123146095/100270666/123085149/606323/123090631/123098215	LOC123180032/LOC123128593/LOC123105435/LOC123145716/LOC123053591/LOC123045718/LOC123120509/LOC123079989/LOC123168027/LOC123167365/LOC123086141/LOC123148128/LOC123182687/LOC123189489/LOC123139638/LOC123099312/LOC123115158/LOC123103220/LOC123146095/LOC100270666/LOC123085149/LOC606323/LOC123090631/LOC123098215	24	20	123128593/123145716/123053591/123045718/123120509/123079989/123168027/123086141/123148128/123182687/123189489/123139638/123099312/123115158/123103220/123146095/100270666/123085149/606323/123098215	4	123180032/123105435/123167365/123090631
BP	GO:0006528	asparagine metabolic process	3/1675	15/19078	0.139059	0.486708	123120509/123103220/606323	LOC123120509/LOC123103220/LOC606323	3	3	123120509/123103220/606323	0
BP	GO:0006529	asparagine biosynthetic process	3/1675	15/19078	0.139059	0.486708	123120509/123103220/606323	LOC123120509/LOC123103220/LOC606323	3	3	123120509/123103220/606323	0
BP	GO:0044283	small molecule biosynthetic process	47/1675	461/19078	0.157599	0.546413	123092719/123098016/123085323/123180032/123119218/123128593/123105435/123085324/123102066/123110172/123145716/123098400/123157472/123053591/123045718/123049559/123120509/123079989/123098015/123168027/123167365/123086141/123148128/123182687/123189489/123041365/123139638/123092717/123189133/123099312/123090862/123115158/123049667/123103220/123090570/123093127/123092924/123104876/123122915/123146095…	LOC123092719/LOC123098016/LOC123085323/LOC123180032/LOC123119218/LOC123128593/LOC123105435/LOC123085324/LOC123102066/LOC123110172/LOC123145716/LOC123098400/LOC123157472/LOC123053591/LOC123045718/LOC123049559/LOC123120509/LOC123079989/LOC123098015/LOC123168027/LOC123167365/LOC123086141/LOC123148128/LOC123182687/LOC123189489/LOC123041365/LOC123139638/LOC123092717/LOC123189133/LOC123099312/LOC123090…	47	36	123092719/123098016/123085323/123119218/123128593/123102066/123110172/123145716/123157472/123053591/123045718/123120509/123079989/123168027/123086141/123148128/123182687/123189489/123041365/123139638/123189133/123099312/123090862/123115158/123049667/123103220/123090570/123092924/123104876/123122915/123146095/100270666/123113163/123085149/606323/123098215	11	123180032/123105435/123085324/123098400/123049559/123098015/123167365/123092717/123093127/123090631/123084953
BP	GO:0005992	trehalose biosynthetic process	6/1675	42/19078	0.159067	0.546413	100270668/123063345/123145030/123085122/123182644/123127938	LOC100270668/LOC123063345/LOC123145030/LOC123085122/LOC123182644/LOC123127938	6	4	123145030/123085122/123182644/123127938	2	100270668/123063345
BP	GO:0016052	carbohydrate catabolic process	16/1675	139/19078	0.159983	0.546413	123053591/123045718/123079989/123069423/123167365/123077920/123182687/123189489/123092239/123105923/123128167/123093753/123181646/123052101/123090631/123098985	LOC123053591/LOC123045718/LOC123079989/LOC123069423/LOC123167365/LOC123077920/LOC123182687/LOC123189489/LOC123092239/LOC123105923/LOC123128167/LOC123093753/LOC123181646/LOC123052101/LOC123090631/LOC123098985	16	14	123053591/123045718/123079989/123069423/123077920/123182687/123189489/123092239/123105923/123128167/123093753/123181646/123052101/123098985	2	123167365/123090631
BP	GO:0006749	glutathione metabolic process	3/1675	16/19078	0.160579	0.546413	123148878/123167324/123158946	LOC123148878/LOC123167324/LOC123158946	3	3	123148878/123167324/123158946	0
BP	GO:0016051	carbohydrate biosynthetic process	19/1675	170/19078	0.164343	0.555367	123092719/123098016/123085323/123044580/123044576/123068318/123052445/123049142/123188320/100270668/123185146/123121827/123063345/123145030/123085122/123182644/123076710/123044579/123127938	LOC123092719/LOC123098016/LOC123085323/LOC123044580/LOC123044576/LOC123068318/LOC123052445/LOC123049142/LOC123188320/LOC100270668/LOC123185146/LOC123121827/LOC123063345/LOC123145030/LOC123085122/LOC123182644/LOC123076710/LOC123044579/LOC123127938	19	14	123092719/123098016/123085323/123044580/123044576/123052445/123049142/123188320/123185146/123145030/123085122/123182644/123044579/123127938	5	123068318/100270668/123121827/123063345/123076710
BP	GO:0015980	energy derivation by oxidation of organic compounds	4/1675	25/19078	0.171947	0.573158	123060630/123164058/123156484/123147894	LOC123060630/LOC123164058/LOC123156484/LOC123147894	4	0		4	123060630/123164058/123156484/123147894
BP	GO:0045333	cellular respiration	4/1675	25/19078	0.171947	0.573158	123060630/123164058/123156484/123147894	LOC123060630/LOC123164058/LOC123156484/LOC123147894	4	0		4	123060630/123164058/123156484/123147894
BP	GO:0006006	glucose metabolic process	5/1675	34/19078	0.173983	0.576024	123092719/123098016/123085323/123092239/123053692	LOC123092719/LOC123098016/LOC123085323/LOC123092239/LOC123053692	5	5	123092719/123098016/123085323/123092239/123053692	0
BP	GO:0042737	drug catabolic process	7/1675	53/19078	0.18023	0.590529	123117018/123125582/123121979/123053755/542839/123088644/123105823	LOC123117018/LOC123125582/LOC123121979/LOC123053755/LOC542839/LOC123088644/LOC123105823	7	7	123117018/123125582/123121979/123053755/542839/123088644/123105823	0
BP	GO:0009072	aromatic amino acid family metabolic process	10/1675	82/19078	0.180774	0.590529	123123214/123049559/123041365/123189133/123136727/123071460/123144206/123104876/123113163/123088644	LOC123123214/LOC123049559/LOC123041365/LOC123189133/LOC123136727/LOC123071460/LOC123144206/LOC123104876/LOC123113163/LOC123088644	10	9	123123214/123041365/123189133/123136727/123071460/123144206/123104876/123113163/123088644	1	123049559
BP	GO:0006520	cellular amino acid metabolic process	42/1675	416/19078	0.190078	0.616355	123189950/123054077/123046199/123119218/123121084/123085324/123102066/123110172/123098400/123113925/123123214/123049559/123120509/123046120/123098015/123103441/123041365/123092717/123181686/123189133/123136727/123071460/123164622/123090862/123103220/123144206/123090570/123157170/123093127/123054000/123092924/123104876/123122915/123085031/123113163/606323/123088644/123098306/123095949/123084953/12…	LOC123189950/LOC123054077/LOC123046199/LOC123119218/LOC123121084/LOC123085324/LOC123102066/LOC123110172/LOC123098400/LOC123113925/LOC123123214/LOC123049559/LOC123120509/LOC123046120/LOC123098015/LOC123103441/LOC123041365/LOC123092717/LOC123181686/LOC123189133/LOC123136727/LOC123071460/LOC123164622/LOC123090862/LOC123103220/LOC123144206/LOC123090570/LOC123157170/LOC123093127/LOC123054000/LOC123092…	42	28	123189950/123054077/123046199/123119218/123102066/123110172/123113925/123123214/123120509/123046120/123041365/123189133/123136727/123071460/123090862/123103220/123144206/123090570/123157170/123054000/123092924/123104876/123122915/123113163/606323/123088644/123095949/123189889	14	123121084/123085324/123098400/123049559/123098015/123103441/123092717/123181686/123164622/123093127/123085031/123098306/123084953/123052821
BP	GO:0065008	regulation of biological quality	37/1675	363/19078	0.191196	0.616355	542857/123106502/123128593/100037546/123115661/123145716/123115654/123181824/123113502/123165939/123130341/542858/123162645/123115656/123149681/100682434/123058447/123191861/123103631/123046279/123096892/123190554/123124288/123124287/123182554/123043648/123065513/123106511/123106505/542961/100270663/123139890/123158636/123079353/542883/123146190/123062219	LOC542857/LOC123106502/LOC123128593/LOC100037546/LOC123115661/LOC123145716/LOC123115654/LOC123181824/LOC123113502/LOC123165939/LOC123130341/LOC542858/LOC123162645/LOC123115656/LOC123149681/LOC100682434/LOC123058447/LOC123191861/LOC123103631/LOC123046279/LOC123096892/LOC123190554/LOC123124288/LOC123124287/LOC123182554/LOC123043648/LOC123065513/LOC123106511/LOC123106505/LOC542961/LOC100270663/LOC12…	37	18	542857/123128593/100037546/123145716/123113502/542858/123162645/100682434/123058447/123191861/123182554/123043648/123065513/542961/100270663/123139890/542883/123146190	19	123106502/123115661/123115654/123181824/123165939/123130341/123115656/123149681/123103631/123046279/123096892/123190554/123124288/123124287/123106511/123106505/123158636/123079353/123062219
BP	GO:0019684	photosynthesis, light reaction	5/1675	36/19078	0.205174	0.639519	novel.2336/123097283/novel.1502/novel.2337/novel.1303	-/LOC123097283/-/-/-	5	0		5	novel.2336/123097283/novel.1502/novel.2337/novel.1303
BP	GO:0000105	histidine biosynthetic process	3/1675	18/19078	0.206212	0.639519	123085324/123098015/123092717	LOC123085324/LOC123098015/LOC123092717	3	0		3	123085324/123098015/123092717
BP	GO:0006547	histidine metabolic process	3/1675	18/19078	0.206212	0.639519	123085324/123098015/123092717	LOC123085324/LOC123098015/LOC123092717	3	0		3	123085324/123098015/123092717
BP	GO:0007205	protein kinase C-activating G protein-coupled receptor signaling pathway	3/1675	18/19078	0.206212	0.639519	123053623/123181820/123130282	LOC123053623/LOC123181820/LOC123130282	3	3	123053623/123181820/123130282	0
BP	GO:0031124	mRNA 3'-end processing	3/1675	18/19078	0.206212	0.639519	123151266/123160920/123165686	LOC123151266/LOC123160920/LOC123165686	3	3	123151266/123160920/123165686	0
BP	GO:0052803	imidazole-containing compound metabolic process	3/1675	18/19078	0.206212	0.639519	123085324/123098015/123092717	LOC123085324/LOC123098015/LOC123092717	3	0		3	123085324/123098015/123092717
BP	GO:0034637	cellular carbohydrate biosynthetic process	16/1675	146/19078	0.210977	0.65018	123044580/123044576/123068318/123052445/123049142/123188320/100270668/123185146/123121827/123063345/123145030/123085122/123182644/123076710/123044579/123127938	LOC123044580/LOC123044576/LOC123068318/LOC123052445/LOC123049142/LOC123188320/LOC100270668/LOC123185146/LOC123121827/LOC123063345/LOC123145030/LOC123085122/LOC123182644/LOC123076710/LOC123044579/LOC123127938	16	11	123044580/123044576/123052445/123049142/123188320/123185146/123145030/123085122/123182644/123044579/123127938	5	123068318/100270668/123121827/123063345/123076710
BP	GO:0000003	reproduction	25/1675	242/19078	0.224348	0.679043	123081811/123167003/123052440/123071023/123050480/123066869/123083460/123148855/123182519/123114278/123190963/123156713/123054748/123106932/123096591/123061459/123150986/123113145/123047261/123065514/123046012/123164598/123061709/123138797/123071765	LOC123081811/LOC123167003/LOC123052440/LOC123071023/LOC123050480/LOC123066869/LOC123083460/LOC123148855/LOC123182519/LOC123114278/LOC123190963/LOC123156713/LOC123054748/LOC123106932/LOC123096591/LOC123061459/LOC123150986/LOC123113145/LOC123047261/LOC123065514/LOC123046012/LOC123164598/LOC123061709/LOC123138797/LOC123071765	25	16	123081811/123167003/123052440/123071023/123083460/123148855/123182519/123114278/123156713/123054748/123106932/123096591/123061459/123150986/123164598/123138797	9	123050480/123066869/123190963/123113145/123047261/123065514/123046012/123061709/123071765
BP	GO:0022414	reproductive process	25/1675	242/19078	0.224348	0.679043	123081811/123167003/123052440/123071023/123050480/123066869/123083460/123148855/123182519/123114278/123190963/123156713/123054748/123106932/123096591/123061459/123150986/123113145/123047261/123065514/123046012/123164598/123061709/123138797/123071765	LOC123081811/LOC123167003/LOC123052440/LOC123071023/LOC123050480/LOC123066869/LOC123083460/LOC123148855/LOC123182519/LOC123114278/LOC123190963/LOC123156713/LOC123054748/LOC123106932/LOC123096591/LOC123061459/LOC123150986/LOC123113145/LOC123047261/LOC123065514/LOC123046012/LOC123164598/LOC123061709/LOC123138797/LOC123071765	25	16	123081811/123167003/123052440/123071023/123083460/123148855/123182519/123114278/123156713/123054748/123106932/123096591/123061459/123150986/123164598/123138797	9	123050480/123066869/123190963/123113145/123047261/123065514/123046012/123061709/123071765
BP	GO:0007165	signal transduction	31/1675	306/19078	0.225886	0.679043	123110850/123190446/123111429/101290629/123053623/123120543/123091657/123162645/123180346/123052860/123087086/123092290/123169796/123181820/123130282/123190998/123111367/123103029/101290612/123095904/123080746/123103237/123120307/123085525/123111217/123061942/123079047/123180731/123055053/123055148/101290611	LOC123110850/LOC123190446/LOC123111429/LOC101290629/LOC123053623/LOC123120543/LOC123091657/LOC123162645/LOC123180346/LOC123052860/LOC123087086/LOC123092290/LOC123169796/LOC123181820/LOC123130282/LOC123190998/LOC123111367/LOC123103029/LOC101290612/LOC123095904/LOC123080746/LOC123103237/LOC123120307/LOC123085525/LOC123111217/LOC123061942/LOC123079047/LOC123180731/LOC123055053/LOC123055148/LOC101290…	31	17	123110850/123190446/123111429/101290629/123053623/123120543/123091657/123162645/123180346/123052860/123092290/123181820/123130282/123111367/123103237/123061942/123079047	14	123087086/123169796/123190998/123103029/101290612/123095904/123080746/123120307/123085525/123111217/123180731/123055053/123055148/101290611
BP	GO:0023052	signaling	31/1675	306/19078	0.225886	0.679043	123110850/123190446/123111429/101290629/123053623/123120543/123091657/123162645/123180346/123052860/123087086/123092290/123169796/123181820/123130282/123190998/123111367/123103029/101290612/123095904/123080746/123103237/123120307/123085525/123111217/123061942/123079047/123180731/123055053/123055148/101290611	LOC123110850/LOC123190446/LOC123111429/LOC101290629/LOC123053623/LOC123120543/LOC123091657/LOC123162645/LOC123180346/LOC123052860/LOC123087086/LOC123092290/LOC123169796/LOC123181820/LOC123130282/LOC123190998/LOC123111367/LOC123103029/LOC101290612/LOC123095904/LOC123080746/LOC123103237/LOC123120307/LOC123085525/LOC123111217/LOC123061942/LOC123079047/LOC123180731/LOC123055053/LOC123055148/LOC101290…	31	17	123110850/123190446/123111429/101290629/123053623/123120543/123091657/123162645/123180346/123052860/123092290/123181820/123130282/123111367/123103237/123061942/123079047	14	123087086/123169796/123190998/123103029/101290612/123095904/123080746/123120307/123085525/123111217/123180731/123055053/123055148/101290611
BP	GO:0046351	disaccharide biosynthetic process	6/1675	47/19078	0.228012	0.681255	100270668/123063345/123145030/123085122/123182644/123127938	LOC100270668/LOC123063345/LOC123145030/LOC123085122/LOC123182644/LOC123127938	6	4	123145030/123085122/123182644/123127938	2	100270668/123063345
BP	GO:0006022	aminoglycan metabolic process	6/1675	48/19078	0.242832	0.683836	123117018/123125582/123121979/123053755/542839/123105823	LOC123117018/LOC123125582/LOC123121979/LOC123053755/LOC542839/LOC123105823	6	6	123117018/123125582/123121979/123053755/542839/123105823	0
BP	GO:0006026	aminoglycan catabolic process	6/1675	48/19078	0.242832	0.683836	123117018/123125582/123121979/123053755/542839/123105823	LOC123117018/LOC123125582/LOC123121979/LOC123053755/LOC542839/LOC123105823	6	6	123117018/123125582/123121979/123053755/542839/123105823	0
BP	GO:0006030	chitin metabolic process	6/1675	48/19078	0.242832	0.683836	123117018/123125582/123121979/123053755/542839/123105823	LOC123117018/LOC123125582/LOC123121979/LOC123053755/LOC542839/LOC123105823	6	6	123117018/123125582/123121979/123053755/542839/123105823	0
BP	GO:0006032	chitin catabolic process	6/1675	48/19078	0.242832	0.683836	123117018/123125582/123121979/123053755/542839/123105823	LOC123117018/LOC123125582/LOC123121979/LOC123053755/LOC542839/LOC123105823	6	6	123117018/123125582/123121979/123053755/542839/123105823	0
BP	GO:0006040	amino sugar metabolic process	6/1675	48/19078	0.242832	0.683836	123117018/123125582/123121979/123053755/542839/123105823	LOC123117018/LOC123125582/LOC123121979/LOC123053755/LOC542839/LOC123105823	6	6	123117018/123125582/123121979/123053755/542839/123105823	0
BP	GO:0016998	cell wall macromolecule catabolic process	6/1675	48/19078	0.242832	0.683836	123117018/123125582/123121979/123053755/542839/123105823	LOC123117018/LOC123125582/LOC123121979/LOC123053755/LOC542839/LOC123105823	6	6	123117018/123125582/123121979/123053755/542839/123105823	0
BP	GO:0044036	cell wall macromolecule metabolic process	6/1675	48/19078	0.242832	0.683836	123117018/123125582/123121979/123053755/542839/123105823	LOC123117018/LOC123125582/LOC123121979/LOC123053755/LOC542839/LOC123105823	6	6	123117018/123125582/123121979/123053755/542839/123105823	0
BP	GO:0046348	amino sugar catabolic process	6/1675	48/19078	0.242832	0.683836	123117018/123125582/123121979/123053755/542839/123105823	LOC123117018/LOC123125582/LOC123121979/LOC123053755/LOC542839/LOC123105823	6	6	123117018/123125582/123121979/123053755/542839/123105823	0
BP	GO:1901071	glucosamine-containing compound metabolic process	6/1675	48/19078	0.242832	0.683836	123117018/123125582/123121979/123053755/542839/123105823	LOC123117018/LOC123125582/LOC123121979/LOC123053755/LOC542839/LOC123105823	6	6	123117018/123125582/123121979/123053755/542839/123105823	0
BP	GO:1901072	glucosamine-containing compound catabolic process	6/1675	48/19078	0.242832	0.683836	123117018/123125582/123121979/123053755/542839/123105823	LOC123117018/LOC123125582/LOC123121979/LOC123053755/LOC542839/LOC123105823	6	6	123117018/123125582/123121979/123053755/542839/123105823	0
BP	GO:0043631	RNA polyadenylation	3/1675	20/19078	0.254294	0.712024	123151266/123160920/123165686	LOC123151266/LOC123160920/LOC123165686	3	3	123151266/123160920/123165686	0
BP	GO:0022900	electron transport chain	5/1675	40/19078	0.272194	0.757814	novel.2336/123097283/novel.1502/novel.2337/novel.1303	-/LOC123097283/-/-/-	5	0		5	novel.2336/123097283/novel.1502/novel.2337/novel.1303
BP	GO:0006308	DNA catabolic process	4/1675	31/19078	0.28757	0.796098	123054895/123050333/123190737/123054894	LOC123054895/LOC123050333/LOC123190737/LOC123054894	4	4	123054895/123050333/123190737/123054894	0
BP	GO:0009073	aromatic amino acid family biosynthetic process	5/1675	42/19078	0.307297	0.84593	123049559/123041365/123189133/123104876/123113163	LOC123049559/LOC123041365/LOC123189133/LOC123104876/LOC123113163	5	4	123041365/123189133/123104876/123113163	1	123049559
BP	GO:0019725	cellular homeostasis	26/1675	268/19078	0.325693	0.884581	542857/123106502/100037546/123115661/123115654/123113502/542858/123162645/123115656/100682434/123058447/123191861/123096892/123190554/123124288/123124287/123182554/123043648/123065513/123106511/123106505/542961/100270663/123139890/542883/123146190	LOC542857/LOC123106502/LOC100037546/LOC123115661/LOC123115654/LOC123113502/LOC542858/LOC123162645/LOC123115656/LOC100682434/LOC123058447/LOC123191861/LOC123096892/LOC123190554/LOC123124288/LOC123124287/LOC123182554/LOC123043648/LOC123065513/LOC123106511/LOC123106505/LOC542961/LOC100270663/LOC123139890/LOC542883/LOC123146190	26	16	542857/100037546/123113502/542858/123162645/100682434/123058447/123191861/123182554/123043648/123065513/542961/100270663/123139890/542883/123146190	10	123106502/123115661/123115654/123115656/123096892/123190554/123124288/123124287/123106511/123106505
BP	GO:0009119	ribonucleoside metabolic process	3/1675	23/19078	0.328604	0.884581	123078820/123061734/123046986	LOC123078820/LOC123061734/LOC123046986	3	3	123078820/123061734/123046986	0
BP	GO:0000271	polysaccharide biosynthetic process	10/1675	96/19078	0.333974	0.884581	123044580/123044576/123068318/123052445/123049142/123188320/123185146/123121827/123076710/123044579	LOC123044580/LOC123044576/LOC123068318/LOC123052445/LOC123049142/LOC123188320/LOC123185146/LOC123121827/LOC123076710/LOC123044579	10	7	123044580/123044576/123052445/123049142/123188320/123185146/123044579	3	123068318/123121827/123076710
BP	GO:0009250	glucan biosynthetic process	10/1675	96/19078	0.333974	0.884581	123044580/123044576/123068318/123052445/123049142/123188320/123185146/123121827/123076710/123044579	LOC123044580/LOC123044576/LOC123068318/LOC123052445/LOC123049142/LOC123188320/LOC123185146/LOC123121827/LOC123076710/LOC123044579	10	7	123044580/123044576/123052445/123049142/123188320/123185146/123044579	3	123068318/123121827/123076710
BP	GO:0033692	cellular polysaccharide biosynthetic process	10/1675	96/19078	0.333974	0.884581	123044580/123044576/123068318/123052445/123049142/123188320/123185146/123121827/123076710/123044579	LOC123044580/LOC123044576/LOC123068318/LOC123052445/LOC123049142/LOC123188320/LOC123185146/LOC123121827/LOC123076710/LOC123044579	10	7	123044580/123044576/123052445/123049142/123188320/123185146/123044579	3	123068318/123121827/123076710
BP	GO:0051273	beta-glucan metabolic process	10/1675	96/19078	0.333974	0.884581	123044580/123044576/123068318/123052445/123049142/123188320/123185146/123121827/123076710/123044579	LOC123044580/LOC123044576/LOC123068318/LOC123052445/LOC123049142/LOC123188320/LOC123185146/LOC123121827/LOC123076710/LOC123044579	10	7	123044580/123044576/123052445/123049142/123188320/123185146/123044579	3	123068318/123121827/123076710
BP	GO:0051274	beta-glucan biosynthetic process	10/1675	96/19078	0.333974	0.884581	123044580/123044576/123068318/123052445/123049142/123188320/123185146/123121827/123076710/123044579	LOC123044580/LOC123044576/LOC123068318/LOC123052445/LOC123049142/LOC123188320/LOC123185146/LOC123121827/LOC123076710/LOC123044579	10	7	123044580/123044576/123052445/123049142/123188320/123185146/123044579	3	123068318/123121827/123076710
BP	GO:0019318	hexose metabolic process	6/1675	54/19078	0.336368	0.88613	123092719/123098016/123085323/123092239/123123515/123053692	LOC123092719/LOC123098016/LOC123085323/LOC123092239/LOC123123515/LOC123053692	6	5	123092719/123098016/123085323/123092239/123053692	1	123123515
BP	GO:0045454	cell redox homeostasis	25/1675	260/19078	0.346649	0.90833	542857/123106502/100037546/123115661/123115654/123113502/542858/123162645/123115656/100682434/123058447/123191861/123096892/123190554/123124288/123124287/123182554/123043648/123065513/123106511/123106505/542961/123139890/542883/123146190	LOC542857/LOC123106502/LOC100037546/LOC123115661/LOC123115654/LOC123113502/LOC542858/LOC123162645/LOC123115656/LOC100682434/LOC123058447/LOC123191861/LOC123096892/LOC123190554/LOC123124288/LOC123124287/LOC123182554/LOC123043648/LOC123065513/LOC123106511/LOC123106505/LOC542961/LOC123139890/LOC542883/LOC123146190	25	15	542857/100037546/123113502/542858/123162645/100682434/123058447/123191861/123182554/123043648/123065513/542961/123139890/542883/123146190	10	123106502/123115661/123115654/123115656/123096892/123190554/123124288/123124287/123106511/123106505
BP	GO:0006721	terpenoid metabolic process	2/1675	14/19078	0.351568	0.911472	123181992/123055375	LOC123181992/LOC123055375	2	0		2	123181992/123055375
BP	GO:0016114	terpenoid biosynthetic process	2/1675	14/19078	0.351568	0.911472	123181992/123055375	LOC123181992/LOC123055375	2	0		2	123181992/123055375
BP	GO:0042546	cell wall biogenesis	5/1675	46/19078	0.378927	0.977233	123113352/543124/123105056/123085635/123097711	LOC123113352/LOC543124/LOC123105056/LOC123085635/LOC123097711	5	5	123113352/543124/123105056/123085635/123097711	0
BP	GO:0015672	monovalent inorganic cation transport	19/1675	202/19078	0.411561	1	123121414/123166012/123065334/123121908/123111848/123152478/123159986/123116391/123141760/123166399/123134486/123158100/543450/123121696/123145391/123150115/123164763/123061742/123070377	LOC123121414/LOC123166012/LOC123065334/LOC123121908/LOC123111848/LOC123152478/LOC123159986/LOC123116391/LOC123141760/LOC123166399/LOC123134486/LOC123158100/LOC543450/LOC123121696/LOC123145391/LOC123150115/LOC123164763/LOC123061742/LOC123070377	19	17	123121414/123065334/123121908/123111848/123159986/123116391/123141760/123166399/123134486/123158100/543450/123121696/123145391/123150115/123164763/123061742/123070377	2	123166012/123152478
BP	GO:0009733	response to auxin	14/1675	147/19078	0.416003	1	123094210/123185774/123107065/123089232/123185047/123041842/123124832/123081572/123049095/123116189/123100300/123130722/123169266/123049805	LOC123094210/LOC123185774/LOC123107065/LOC123089232/LOC123185047/LOC123041842/LOC123124832/LOC123081572/LOC123049095/LOC123116189/LOC123100300/LOC123130722/LOC123169266/LOC123049805	14	10	123185774/123107065/123089232/123041842/123081572/123116189/123100300/123130722/123169266/123049805	4	123094210/123185047/123124832/123049095
BP	GO:0006541	glutamine metabolic process	2/1675	16/19078	0.416216	1	123090862/123092924	LOC123090862/LOC123092924	2	2	123090862/123092924	0
BP	GO:0006542	glutamine biosynthetic process	2/1675	16/19078	0.416216	1	123090862/123092924	LOC123090862/LOC123092924	2	2	123090862/123092924	0
BP	GO:0009312	oligosaccharide biosynthetic process	6/1675	59/19078	0.416986	1	100270668/123063345/123145030/123085122/123182644/123127938	LOC100270668/LOC123063345/LOC123145030/LOC123085122/LOC123182644/LOC123127938	6	4	123145030/123085122/123182644/123127938	2	100270668/123063345
BP	GO:0006091	generation of precursor metabolites and energy	16/1675	171/19078	0.433235	1	123060630/123164058/123156484/123053591/123045718/123079989/123167365/123182687/novel.2336/123189489/123147894/123097283/novel.1502/novel.2337/123090631/novel.1303	LOC123060630/LOC123164058/LOC123156484/LOC123053591/LOC123045718/LOC123079989/LOC123167365/LOC123182687/-/LOC123189489/LOC123147894/LOC123097283/-/-/LOC123090631/-	16	5	123053591/123045718/123079989/123182687/123189489	11	123060630/123164058/123156484/123167365/novel.2336/123147894/123097283/novel.1502/novel.2337/123090631/novel.1303
BP	GO:0019439	aromatic compound catabolic process	18/1675	194/19078	0.439178	1	123157472/123053591/123045718/123079989/123167365/123054895/123182687/123189489/123071460/123077378/123049667/123050333/123190737/123078820/123054894/123061734/123090631/123088644	LOC123157472/LOC123053591/LOC123045718/LOC123079989/LOC123167365/LOC123054895/LOC123182687/LOC123189489/LOC123071460/LOC123077378/LOC123049667/LOC123050333/LOC123190737/LOC123078820/LOC123054894/LOC123061734/LOC123090631/LOC123088644	18	16	123157472/123053591/123045718/123079989/123054895/123182687/123189489/123071460/123077378/123049667/123050333/123190737/123078820/123054894/123061734/123088644	2	123167365/123090631
BP	GO:1901361	organic cyclic compound catabolic process	18/1675	194/19078	0.439178	1	123157472/123053591/123045718/123079989/123167365/123054895/123182687/123189489/123071460/123077378/123049667/123050333/123190737/123078820/123054894/123061734/123090631/123088644	LOC123157472/LOC123053591/LOC123045718/LOC123079989/LOC123167365/LOC123054895/LOC123182687/LOC123189489/LOC123071460/LOC123077378/LOC123049667/LOC123050333/LOC123190737/LOC123078820/LOC123054894/LOC123061734/LOC123090631/LOC123088644	18	16	123157472/123053591/123045718/123079989/123054895/123182687/123189489/123071460/123077378/123049667/123050333/123190737/123078820/123054894/123061734/123088644	2	123167365/123090631
BP	GO:0042592	homeostatic process	27/1675	296/19078	0.447	1	542857/123106502/100037546/123115661/123115654/123113502/542858/123162645/123115656/100682434/123058447/123191861/123103631/123096892/123190554/123124288/123124287/123182554/123043648/123065513/123106511/123106505/542961/100270663/123139890/542883/123146190	LOC542857/LOC123106502/LOC100037546/LOC123115661/LOC123115654/LOC123113502/LOC542858/LOC123162645/LOC123115656/LOC100682434/LOC123058447/LOC123191861/LOC123103631/LOC123096892/LOC123190554/LOC123124288/LOC123124287/LOC123182554/LOC123043648/LOC123065513/LOC123106511/LOC123106505/LOC542961/LOC100270663/LOC123139890/LOC542883/LOC123146190	27	16	542857/100037546/123113502/542858/123162645/100682434/123058447/123191861/123182554/123043648/123065513/542961/100270663/123139890/542883/123146190	11	123106502/123115661/123115654/123115656/123103631/123096892/123190554/123124288/123124287/123106511/123106505
BP	GO:0044282	small molecule catabolic process	5/1675	53/19078	0.502461	1	123092239/123071460/123078820/123061734/123088644	LOC123092239/LOC123071460/LOC123078820/LOC123061734/LOC123088644	5	5	123092239/123071460/123078820/123061734/123088644	0
BP	GO:0034655	nucleobase-containing compound catabolic process	15/1675	168/19078	0.512448	1	123157472/123053591/123045718/123079989/123167365/123054895/123182687/123189489/123049667/123050333/123190737/123078820/123054894/123061734/123090631	LOC123157472/LOC123053591/LOC123045718/LOC123079989/LOC123167365/LOC123054895/LOC123182687/LOC123189489/LOC123049667/LOC123050333/LOC123190737/LOC123078820/LOC123054894/LOC123061734/LOC123090631	15	13	123157472/123053591/123045718/123079989/123054895/123182687/123189489/123049667/123050333/123190737/123078820/123054894/123061734	2	123167365/123090631
BP	GO:0046700	heterocycle catabolic process	17/1675	191/19078	0.513716	1	123157472/123053591/123045718/123079989/123167365/123054895/123182687/123189489/123071460/123077378/123049667/123050333/123190737/123078820/123054894/123061734/123090631	LOC123157472/LOC123053591/LOC123045718/LOC123079989/LOC123167365/LOC123054895/LOC123182687/LOC123189489/LOC123071460/LOC123077378/LOC123049667/LOC123050333/LOC123190737/LOC123078820/LOC123054894/LOC123061734/LOC123090631	17	15	123157472/123053591/123045718/123079989/123054895/123182687/123189489/123071460/123077378/123049667/123050333/123190737/123078820/123054894/123061734	2	123167365/123090631
BP	GO:0031123	RNA 3'-end processing	3/1675	31/19078	0.5199	1	123151266/123160920/123165686	LOC123151266/LOC123160920/LOC123165686	3	3	123151266/123160920/123165686	0
BP	GO:0072527	pyrimidine-containing compound metabolic process	4/1675	43/19078	0.528957	1	123051558/123069137/123078820/123061734	LOC123051558/LOC123069137/LOC123078820/LOC123061734	4	2	123078820/123061734	2	123051558/123069137
BP	GO:0009074	aromatic amino acid family catabolic process	2/1675	20/19078	0.534585	1	123071460/123088644	LOC123071460/LOC123088644	2	2	123071460/123088644	0
BP	GO:0044270	cellular nitrogen compound catabolic process	17/1675	194/19078	0.540488	1	123157472/123053591/123045718/123079989/123167365/123054895/123182687/123189489/123071460/123077378/123049667/123050333/123190737/123078820/123054894/123061734/123090631	LOC123157472/LOC123053591/LOC123045718/LOC123079989/LOC123167365/LOC123054895/LOC123182687/LOC123189489/LOC123071460/LOC123077378/LOC123049667/LOC123050333/LOC123190737/LOC123078820/LOC123054894/LOC123061734/LOC123090631	17	15	123157472/123053591/123045718/123079989/123054895/123182687/123189489/123071460/123077378/123049667/123050333/123190737/123078820/123054894/123061734	2	123167365/123090631
BP	GO:0042398	cellular modified amino acid biosynthetic process	3/1675	32/19078	0.541825	1	123148878/123167324/123158946	LOC123148878/LOC123167324/LOC123158946	3	3	123148878/123167324/123158946	0
BP	GO:0016458	gene silencing	4/1675	45/19078	0.56576	1	123156432/123147378/123061483/123086489	LOC123156432/LOC123147378/LOC123061483/LOC123086489	4	4	123156432/123147378/123061483/123086489	0
BP	GO:0031047	gene silencing by RNA	4/1675	45/19078	0.56576	1	123156432/123147378/123061483/123086489	LOC123156432/LOC123147378/LOC123061483/LOC123086489	4	4	123156432/123147378/123061483/123086489	0
BP	GO:0007275	multicellular organism development	8/1675	93/19078	0.577583	1	123167003/123083460/123148855/123066054/123156713/123106932/123150986/123164598	LOC123167003/LOC123083460/LOC123148855/LOC123066054/LOC123156713/LOC123106932/LOC123150986/LOC123164598	8	8	123167003/123083460/123148855/123066054/123156713/123106932/123150986/123164598	0
BP	GO:0032502	developmental process	8/1675	93/19078	0.577583	1	123167003/123083460/123148855/123066054/123156713/123106932/123150986/123164598	LOC123167003/LOC123083460/LOC123148855/LOC123066054/LOC123156713/LOC123106932/LOC123150986/LOC123164598	8	8	123167003/123083460/123148855/123066054/123156713/123106932/123150986/123164598	0
BP	GO:0048856	anatomical structure development	8/1675	93/19078	0.577583	1	123167003/123083460/123148855/123066054/123156713/123106932/123150986/123164598	LOC123167003/LOC123083460/LOC123148855/LOC123066054/LOC123156713/LOC123106932/LOC123150986/LOC123164598	8	8	123167003/123083460/123148855/123066054/123156713/123106932/123150986/123164598	0
BP	GO:0051186	cofactor metabolic process	27/1675	315/19078	0.581815	1	123127933/123137700/123148878/123127932/123167324/123137699/123053591/123045718/123181803/123079989/123177012/123167365/123182687/123189489/123104204/123077378/123069861/123099419/123086676/123051558/123091299/123090631/123158946/123062261/123121368/123116104/123046986	LOC123127933/LOC123137700/LOC123148878/LOC123127932/LOC123167324/LOC123137699/LOC123053591/LOC123045718/LOC123181803/LOC123079989/LOC123177012/LOC123167365/LOC123182687/LOC123189489/LOC123104204/LOC123077378/LOC123069861/LOC123099419/LOC123086676/LOC123051558/LOC123091299/LOC123090631/LOC123158946/LOC123062261/LOC123121368/LOC123116104/LOC123046986	27	24	123127933/123137700/123148878/123127932/123167324/123137699/123053591/123045718/123181803/123079989/123177012/123182687/123189489/123104204/123077378/123069861/123099419/123086676/123091299/123158946/123062261/123121368/123116104/123046986	3	123167365/123051558/123090631
BP	GO:0072350	tricarboxylic acid metabolic process	4/1675	46/19078	0.583553	1	123060630/123164058/123156484/123147894	LOC123060630/LOC123164058/LOC123156484/LOC123147894	4	0		4	123060630/123164058/123156484/123147894
BP	GO:0015689	molybdate ion transport	2/1675	22/19078	0.587278	1	123048932/123063357	LOC123048932/LOC123063357	2	1	123048932	1	123063357
BP	GO:1901606	alpha-amino acid catabolic process	2/1675	22/19078	0.587278	1	123071460/123088644	LOC123071460/LOC123088644	2	2	123071460/123088644	0
BP	GO:0006720	isoprenoid metabolic process	4/1675	47/19078	0.600917	1	123181992/123055375/123137670/123145055	LOC123181992/LOC123055375/LOC123137670/LOC123145055	4	2	123137670/123145055	2	123181992/123055375
BP	GO:0008299	isoprenoid biosynthetic process	4/1675	47/19078	0.600917	1	123181992/123055375/123137670/123145055	LOC123181992/LOC123055375/LOC123137670/LOC123145055	4	2	123137670/123145055	2	123181992/123055375
BP	GO:0009890	negative regulation of biosynthetic process	2/1675	23/19078	0.611914	1	123140706/123084804	LOC123140706/LOC123084804	2	1	123084804	1	123140706
BP	GO:0010558	negative regulation of macromolecule biosynthetic process	2/1675	23/19078	0.611914	1	123140706/123084804	LOC123140706/LOC123084804	2	1	123084804	1	123140706
BP	GO:0031327	negative regulation of cellular biosynthetic process	2/1675	23/19078	0.611914	1	123140706/123084804	LOC123140706/LOC123084804	2	1	123084804	1	123140706
BP	GO:2000113	negative regulation of cellular macromolecule biosynthetic process	2/1675	23/19078	0.611914	1	123140706/123084804	LOC123140706/LOC123084804	2	1	123084804	1	123140706
BP	GO:0032501	multicellular organismal process	26/1675	308/19078	0.613397	1	123081811/123167003/123052440/123071023/123050480/123066869/123083460/123148855/123182519/123066054/123114278/123190963/123156713/123054748/123106932/123096591/123061459/123150986/123113145/123047261/123065514/123046012/123164598/123061709/123138797/123071765	LOC123081811/LOC123167003/LOC123052440/LOC123071023/LOC123050480/LOC123066869/LOC123083460/LOC123148855/LOC123182519/LOC123066054/LOC123114278/LOC123190963/LOC123156713/LOC123054748/LOC123106932/LOC123096591/LOC123061459/LOC123150986/LOC123113145/LOC123047261/LOC123065514/LOC123046012/LOC123164598/LOC123061709/LOC123138797/LOC123071765	26	17	123081811/123167003/123052440/123071023/123083460/123148855/123182519/123066054/123114278/123156713/123054748/123106932/123096591/123061459/123150986/123164598/123138797	9	123050480/123066869/123190963/123113145/123047261/123065514/123046012/123061709/123071765
BP	GO:0000413	protein peptidyl-prolyl isomerization	6/1675	72/19078	0.614076	1	123131889/123044525/123129092/123057458/123064239/123128429	LOC123131889/LOC123044525/LOC123129092/LOC123057458/LOC123064239/LOC123128429	6	3	123131889/123129092/123128429	3	123044525/123057458/123064239
BP	GO:0018208	peptidyl-proline modification	6/1675	72/19078	0.614076	1	123131889/123044525/123129092/123057458/123064239/123128429	LOC123131889/LOC123044525/LOC123129092/LOC123057458/LOC123064239/LOC123128429	6	3	123131889/123129092/123128429	3	123044525/123057458/123064239
BP	GO:0008037	cell recognition	18/1675	215/19078	0.619449	1	123081811/123052440/123071023/123050480/123066869/123182519/123114278/123190963/123054748/123096591/123061459/123113145/123047261/123065514/123046012/123061709/123138797/123071765	LOC123081811/LOC123052440/LOC123071023/LOC123050480/LOC123066869/LOC123182519/LOC123114278/LOC123190963/LOC123054748/LOC123096591/LOC123061459/LOC123113145/LOC123047261/LOC123065514/LOC123046012/LOC123061709/LOC123138797/LOC123071765	18	9	123081811/123052440/123071023/123182519/123114278/123054748/123096591/123061459/123138797	9	123050480/123066869/123190963/123113145/123047261/123065514/123046012/123061709/123071765
BP	GO:0009856	pollination	18/1675	215/19078	0.619449	1	123081811/123052440/123071023/123050480/123066869/123182519/123114278/123190963/123054748/123096591/123061459/123113145/123047261/123065514/123046012/123061709/123138797/123071765	LOC123081811/LOC123052440/LOC123071023/LOC123050480/LOC123066869/LOC123182519/LOC123114278/LOC123190963/LOC123054748/LOC123096591/LOC123061459/LOC123113145/LOC123047261/LOC123065514/LOC123046012/LOC123061709/LOC123138797/LOC123071765	18	9	123081811/123052440/123071023/123182519/123114278/123054748/123096591/123061459/123138797	9	123050480/123066869/123190963/123113145/123047261/123065514/123046012/123061709/123071765
BP	GO:0009875	pollen-pistil interaction	18/1675	215/19078	0.619449	1	123081811/123052440/123071023/123050480/123066869/123182519/123114278/123190963/123054748/123096591/123061459/123113145/123047261/123065514/123046012/123061709/123138797/123071765	LOC123081811/LOC123052440/LOC123071023/LOC123050480/LOC123066869/LOC123182519/LOC123114278/LOC123190963/LOC123054748/LOC123096591/LOC123061459/LOC123113145/LOC123047261/LOC123065514/LOC123046012/LOC123061709/LOC123138797/LOC123071765	18	9	123081811/123052440/123071023/123182519/123114278/123054748/123096591/123061459/123138797	9	123050480/123066869/123190963/123113145/123047261/123065514/123046012/123061709/123071765
BP	GO:0044706	multi-multicellular organism process	18/1675	215/19078	0.619449	1	123081811/123052440/123071023/123050480/123066869/123182519/123114278/123190963/123054748/123096591/123061459/123113145/123047261/123065514/123046012/123061709/123138797/123071765	LOC123081811/LOC123052440/LOC123071023/LOC123050480/LOC123066869/LOC123182519/LOC123114278/LOC123190963/LOC123054748/LOC123096591/LOC123061459/LOC123113145/LOC123047261/LOC123065514/LOC123046012/LOC123061709/LOC123138797/LOC123071765	18	9	123081811/123052440/123071023/123182519/123114278/123054748/123096591/123061459/123138797	9	123050480/123066869/123190963/123113145/123047261/123065514/123046012/123061709/123071765
BP	GO:0048544	recognition of pollen	18/1675	215/19078	0.619449	1	123081811/123052440/123071023/123050480/123066869/123182519/123114278/123190963/123054748/123096591/123061459/123113145/123047261/123065514/123046012/123061709/123138797/123071765	LOC123081811/LOC123052440/LOC123071023/LOC123050480/LOC123066869/LOC123182519/LOC123114278/LOC123190963/LOC123054748/LOC123096591/LOC123061459/LOC123113145/LOC123047261/LOC123065514/LOC123046012/LOC123061709/LOC123138797/LOC123071765	18	9	123081811/123052440/123071023/123182519/123114278/123054748/123096591/123061459/123138797	9	123050480/123066869/123190963/123113145/123047261/123065514/123046012/123061709/123071765
BP	GO:0007186	G-protein-coupled receptor signaling pathway	3/1675	36/19078	0.623376	1	123053623/123181820/123130282	LOC123053623/LOC123181820/LOC123130282	3	3	123053623/123181820/123130282	0
BP	GO:0006013	mannose metabolic process	1/1675	11/19078	0.636183	1	123123515	LOC123123515	1	0		1	123123515
BP	GO:0006275	regulation of DNA replication	1/1675	11/19078	0.636183	1	123084804	LOC123084804	1	1	123084804	0
BP	GO:0009063	cellular amino acid catabolic process	2/1675	25/19078	0.657771	1	123071460/123088644	LOC123071460/LOC123088644	2	2	123071460/123088644	0
BP	GO:0044255	cellular lipid metabolic process	33/1675	398/19078	0.662023	1	123180032/123155757/123105435/123163916/123095790/123065590/123168642/123181992/123168027/100415864/123086141/123102951/123045284/123148128/123068299/123139638/123099312/123140708/123055375/123057498/123137670/123115158/123145055/123090780/123111108/123087182/123146095/100270666/123085149/123098215/123101920/123161912/123068651	LOC123180032/LOC123155757/LOC123105435/LOC123163916/LOC123095790/LOC123065590/LOC123168642/LOC123181992/LOC123168027/LOC100415864/LOC123086141/LOC123102951/LOC123045284/LOC123148128/LOC123068299/LOC123139638/LOC123099312/LOC123140708/LOC123055375/LOC123057498/LOC123137670/LOC123115158/LOC123145055/LOC123090780/LOC123111108/LOC123087182/LOC123146095/LOC100270666/LOC123085149/LOC123098215/LOC123101…	33	24	123155757/123163916/123095790/123065590/123168642/123168027/100415864/123086141/123045284/123148128/123139638/123099312/123137670/123115158/123145055/123090780/123087182/123146095/100270666/123085149/123098215/123101920/123161912/123068651	9	123180032/123105435/123181992/123102951/123068299/123140708/123055375/123057498/123111108
BP	GO:0006570	tyrosine metabolic process	1/1675	12/19078	0.668143	1	123088644	LOC123088644	1	1	123088644	0
BP	GO:0006826	iron ion transport	1/1675	12/19078	0.668143	1	123102567	LOC123102567	1	0		1	123102567
BP	GO:0034755	iron ion transmembrane transport	1/1675	12/19078	0.668143	1	123102567	LOC123102567	1	0		1	123102567
BP	GO:0051187	cofactor catabolic process	1/1675	12/19078	0.668143	1	123077378	LOC123077378	1	1	123077378	0
BP	GO:0098655	cation transmembrane transport	16/1675	198/19078	0.673128	1	123121414/123111848/123152478/123159986/123141760/123166399/123134486/123158100/543450/123102567/123121696/123145391/123150115/123164763/123061742/123070377	LOC123121414/LOC123111848/LOC123152478/LOC123159986/LOC123141760/LOC123166399/LOC123134486/LOC123158100/LOC543450/LOC123102567/LOC123121696/LOC123145391/LOC123150115/LOC123164763/LOC123061742/LOC123070377	16	14	123121414/123111848/123159986/123141760/123166399/123134486/123158100/543450/123121696/123145391/123150115/123164763/123061742/123070377	2	123152478/123102567
BP	GO:0098660	inorganic ion transmembrane transport	16/1675	198/19078	0.673128	1	123121414/123111848/123152478/123159986/123141760/123166399/123134486/123158100/543450/123102567/123121696/123145391/123150115/123164763/123061742/123070377	LOC123121414/LOC123111848/LOC123152478/LOC123159986/LOC123141760/LOC123166399/LOC123134486/LOC123158100/LOC543450/LOC123102567/LOC123121696/LOC123145391/LOC123150115/LOC123164763/LOC123061742/LOC123070377	16	14	123121414/123111848/123159986/123141760/123166399/123134486/123158100/543450/123121696/123145391/123150115/123164763/123061742/123070377	2	123152478/123102567
BP	GO:0098662	inorganic cation transmembrane transport	16/1675	198/19078	0.673128	1	123121414/123111848/123152478/123159986/123141760/123166399/123134486/123158100/543450/123102567/123121696/123145391/123150115/123164763/123061742/123070377	LOC123121414/LOC123111848/LOC123152478/LOC123159986/LOC123141760/LOC123166399/LOC123134486/LOC123158100/LOC543450/LOC123102567/LOC123121696/LOC123145391/LOC123150115/LOC123164763/LOC123061742/LOC123070377	16	14	123121414/123111848/123159986/123141760/123166399/123134486/123158100/543450/123121696/123145391/123150115/123164763/123061742/123070377	2	123152478/123102567
BP	GO:0071554	cell wall organization or biogenesis	11/1675	138/19078	0.675668	1	123117018/123125582/123113352/543124/123105056/123121979/123085635/123053755/542839/123097711/123105823	LOC123117018/LOC123125582/LOC123113352/LOC543124/LOC123105056/LOC123121979/LOC123085635/LOC123053755/LOC542839/LOC123097711/LOC123105823	11	11	123117018/123125582/123113352/543124/123105056/123121979/123085635/123053755/542839/123097711/123105823	0
BP	GO:0031324	negative regulation of cellular metabolic process	2/1675	26/19078	0.67902	1	123140706/123084804	LOC123140706/LOC123084804	2	1	123084804	1	123140706
BP	GO:0051172	negative regulation of nitrogen compound metabolic process	2/1675	26/19078	0.67902	1	123140706/123084804	LOC123140706/LOC123084804	2	1	123084804	1	123140706
BP	GO:1901292	nucleoside phosphate catabolic process	9/1675	114/19078	0.679291	1	123157472/123053591/123045718/123079989/123167365/123182687/123189489/123049667/123090631	LOC123157472/LOC123053591/LOC123045718/LOC123079989/LOC123167365/LOC123182687/LOC123189489/LOC123049667/LOC123090631	9	7	123157472/123053591/123045718/123079989/123182687/123189489/123049667	2	123167365/123090631
BP	GO:0017144	drug metabolic process	30/1675	366/19078	0.681605	1	123060630/123117018/123127933/123125582/123164058/123137700/123127932/123156484/123137699/123053591/123045718/123049559/123079989/123167365/123121979/123053755/542839/123182687/123189489/123041365/123189133/123069861/123147894/123104876/123113163/123061742/123090631/123088644/123105823/123070377	LOC123060630/LOC123117018/LOC123127933/LOC123125582/LOC123164058/LOC123137700/LOC123127932/LOC123156484/LOC123137699/LOC123053591/LOC123045718/LOC123049559/LOC123079989/LOC123167365/LOC123121979/LOC123053755/LOC542839/LOC123182687/LOC123189489/LOC123041365/LOC123189133/LOC123069861/LOC123147894/LOC123104876/LOC123113163/LOC123061742/LOC123090631/LOC123088644/LOC123105823/LOC123070377	30	23	123117018/123127933/123125582/123137700/123127932/123137699/123053591/123045718/123079989/123121979/123053755/542839/123182687/123189489/123041365/123189133/123069861/123104876/123113163/123061742/123088644/123105823/123070377	7	123060630/123164058/123156484/123049559/123167365/123147894/123090631
BP	GO:0006595	polyamine metabolic process	1/1675	13/19078	0.697298	1	123189472	LOC123189472	1	1	123189472	0
BP	GO:0006596	polyamine biosynthetic process	1/1675	13/19078	0.697298	1	123189472	LOC123189472	1	1	123189472	0
BP	GO:0097164	ammonium ion metabolic process	1/1675	13/19078	0.697298	1	123189472	LOC123189472	1	1	123189472	0
BP	GO:0009064	glutamine family amino acid metabolic process	2/1675	27/19078	0.699179	1	123090862/123092924	LOC123090862/LOC123092924	2	2	123090862/123092924	0
BP	GO:0009084	glutamine family amino acid biosynthetic process	2/1675	27/19078	0.699179	1	123090862/123092924	LOC123090862/LOC123092924	2	2	123090862/123092924	0
BP	GO:0034404	nucleobase-containing small molecule biosynthetic process	9/1675	117/19078	0.708879	1	123157472/123053591/123045718/123079989/123167365/123182687/123189489/123049667/123090631	LOC123157472/LOC123053591/LOC123045718/LOC123079989/LOC123167365/LOC123182687/LOC123189489/LOC123049667/LOC123090631	9	7	123157472/123053591/123045718/123079989/123182687/123189489/123049667	2	123167365/123090631
BP	GO:0009166	nucleotide catabolic process	8/1675	105/19078	0.713156	1	123157472/123053591/123045718/123079989/123167365/123182687/123189489/123090631	LOC123157472/LOC123053591/LOC123045718/LOC123079989/LOC123167365/LOC123182687/LOC123189489/LOC123090631	8	6	123157472/123053591/123045718/123079989/123182687/123189489	2	123167365/123090631
BP	GO:0015979	photosynthesis	12/1675	155/19078	0.717542	1	123128885/123146030/123139414/novel.2336/123144890/123189863/123189252/123097283/novel.1502/novel.2337/123127700/novel.1303	LOC123128885/LOC123146030/LOC123139414/-/LOC123144890/LOC123189863/LOC123189252/LOC123097283/-/-/LOC123127700/-	12	3	123144890/123189863/123127700	9	123128885/123146030/123139414/novel.2336/123189252/123097283/novel.1502/novel.2337/novel.1303
BP	GO:0048583	regulation of response to stimulus	3/1675	42/19078	0.725905	1	123169410/123139793/123169411	LOC123169410/LOC123139793/LOC123169411	3	3	123169410/123139793/123169411	0
BP	GO:0006575	cellular modified amino acid metabolic process	3/1675	43/19078	0.740676	1	123148878/123167324/123158946	LOC123148878/LOC123167324/LOC123158946	3	3	123148878/123167324/123158946	0
BP	GO:0051188	cofactor biosynthetic process	19/1675	244/19078	0.74155	1	123127933/123137700/123148878/123127932/123167324/123137699/123053591/123045718/123079989/123167365/123182687/123189489/123069861/123051558/123090631/123158946/123121368/123116104/123046986	LOC123127933/LOC123137700/LOC123148878/LOC123127932/LOC123167324/LOC123137699/LOC123053591/LOC123045718/LOC123079989/LOC123167365/LOC123182687/LOC123189489/LOC123069861/LOC123051558/LOC123090631/LOC123158946/LOC123121368/LOC123116104/LOC123046986	19	16	123127933/123137700/123148878/123127932/123167324/123137699/123053591/123045718/123079989/123182687/123189489/123069861/123158946/123121368/123116104/123046986	3	123167365/123051558/123090631
BP	GO:0006419	alanyl-tRNA aminoacylation	1/1675	15/19078	0.748152	1	123095949	LOC123095949	1	1	123095949	0
BP	GO:0015936	coenzyme A metabolic process	1/1675	15/19078	0.748152	1	123104204	LOC123104204	1	1	123104204	0
BP	GO:0009108	coenzyme biosynthetic process	15/1675	197/19078	0.755016	1	123127933/123137700/123127932/123137699/123053591/123045718/123079989/123167365/123182687/123189489/123069861/123051558/123090631/123121368/123116104	LOC123127933/LOC123137700/LOC123127932/LOC123137699/LOC123053591/LOC123045718/LOC123079989/LOC123167365/LOC123182687/LOC123189489/LOC123069861/LOC123051558/LOC123090631/LOC123121368/LOC123116104	15	12	123127933/123137700/123127932/123137699/123053591/123045718/123079989/123182687/123189489/123069861/123121368/123116104	3	123167365/123051558/123090631
BP	GO:0045229	external encapsulating structure organization	5/1675	72/19078	0.768889	1	123113352/543124/123105056/123085635/123097711	LOC123113352/LOC543124/LOC123105056/LOC123085635/LOC123097711	5	5	123113352/543124/123105056/123085635/123097711	0
BP	GO:0071555	cell wall organization	5/1675	72/19078	0.768889	1	123113352/543124/123105056/123085635/123097711	LOC123113352/LOC543124/LOC123105056/LOC123085635/LOC123097711	5	5	123113352/543124/123105056/123085635/123097711	0
BP	GO:0006261	DNA-dependent DNA replication	2/1675	31/19078	0.769508	1	123084804/123061267	LOC123084804/LOC123061267	2	2	123084804/123061267	0
BP	GO:0009772	photosynthetic electron transport in photosystem II	1/1675	16/19078	0.770281	1	novel.1502	-	1	0		1	novel.1502
BP	GO:0051052	regulation of DNA metabolic process	1/1675	16/19078	0.770281	1	123084804	LOC123084804	1	1	123084804	0
BP	GO:0046434	organophosphate catabolic process	9/1675	125/19078	0.778823	1	123157472/123053591/123045718/123079989/123167365/123182687/123189489/123049667/123090631	LOC123157472/LOC123053591/LOC123045718/LOC123079989/LOC123167365/LOC123182687/LOC123189489/LOC123049667/LOC123090631	9	7	123157472/123053591/123045718/123079989/123182687/123189489/123049667	2	123167365/123090631
BP	GO:0006732	coenzyme metabolic process	17/1675	227/19078	0.787732	1	123127933/123137700/123127932/123137699/123053591/123045718/123079989/123167365/123182687/123189489/123104204/123069861/123051558/123090631/123121368/123116104/123046986	LOC123127933/LOC123137700/LOC123127932/LOC123137699/LOC123053591/LOC123045718/LOC123079989/LOC123167365/LOC123182687/LOC123189489/LOC123104204/LOC123069861/LOC123051558/LOC123090631/LOC123121368/LOC123116104/LOC123046986	17	14	123127933/123137700/123127932/123137699/123053591/123045718/123079989/123182687/123189489/123104204/123069861/123121368/123116104/123046986	3	123167365/123051558/123090631
BP	GO:0006569	tryptophan catabolic process	1/1675	17/19078	0.790466	1	123071460	LOC123071460	1	1	123071460	0
BP	GO:0009310	amine catabolic process	1/1675	17/19078	0.790466	1	123071460	LOC123071460	1	1	123071460	0
BP	GO:0019441	tryptophan catabolic process to kynurenine	1/1675	17/19078	0.790466	1	123071460	LOC123071460	1	1	123071460	0
BP	GO:0042402	cellular biogenic amine catabolic process	1/1675	17/19078	0.790466	1	123071460	LOC123071460	1	1	123071460	0
BP	GO:0042436	indole-containing compound catabolic process	1/1675	17/19078	0.790466	1	123071460	LOC123071460	1	1	123071460	0
BP	GO:0042537	benzene-containing compound metabolic process	1/1675	17/19078	0.790466	1	123071460	LOC123071460	1	1	123071460	0
BP	GO:0046218	indolalkylamine catabolic process	1/1675	17/19078	0.790466	1	123071460	LOC123071460	1	1	123071460	0
BP	GO:0070189	kynurenine metabolic process	1/1675	17/19078	0.790466	1	123071460	LOC123071460	1	1	123071460	0
BP	GO:0009892	negative regulation of metabolic process	6/1675	88/19078	0.795604	1	123140706/123156432/123084804/123147378/123061483/123086489	LOC123140706/LOC123156432/LOC123084804/LOC123147378/LOC123061483/LOC123086489	6	5	123156432/123084804/123147378/123061483/123086489	1	123140706
BP	GO:0010605	negative regulation of macromolecule metabolic process	6/1675	88/19078	0.795604	1	123140706/123156432/123084804/123147378/123061483/123086489	LOC123140706/LOC123156432/LOC123084804/LOC123147378/LOC123061483/LOC123086489	6	5	123156432/123084804/123147378/123061483/123086489	1	123140706
BP	GO:0006096	glycolytic process	7/1675	103/19078	0.810314	1	123053591/123045718/123079989/123167365/123182687/123189489/123090631	LOC123053591/LOC123045718/LOC123079989/LOC123167365/LOC123182687/LOC123189489/LOC123090631	7	5	123053591/123045718/123079989/123182687/123189489	2	123167365/123090631
BP	GO:0006165	nucleoside diphosphate phosphorylation	7/1675	103/19078	0.810314	1	123053591/123045718/123079989/123167365/123182687/123189489/123090631	LOC123053591/LOC123045718/LOC123079989/LOC123167365/LOC123182687/LOC123189489/LOC123090631	7	5	123053591/123045718/123079989/123182687/123189489	2	123167365/123090631
BP	GO:0006757	ATP generation from ADP	7/1675	103/19078	0.810314	1	123053591/123045718/123079989/123167365/123182687/123189489/123090631	LOC123053591/LOC123045718/LOC123079989/LOC123167365/LOC123182687/LOC123189489/LOC123090631	7	5	123053591/123045718/123079989/123182687/123189489	2	123167365/123090631
BP	GO:0009132	nucleoside diphosphate metabolic process	7/1675	103/19078	0.810314	1	123053591/123045718/123079989/123167365/123182687/123189489/123090631	LOC123053591/LOC123045718/LOC123079989/LOC123167365/LOC123182687/LOC123189489/LOC123090631	7	5	123053591/123045718/123079989/123182687/123189489	2	123167365/123090631
BP	GO:0009135	purine nucleoside diphosphate metabolic process	7/1675	103/19078	0.810314	1	123053591/123045718/123079989/123167365/123182687/123189489/123090631	LOC123053591/LOC123045718/LOC123079989/LOC123167365/LOC123182687/LOC123189489/LOC123090631	7	5	123053591/123045718/123079989/123182687/123189489	2	123167365/123090631
BP	GO:0009179	purine ribonucleoside diphosphate metabolic process	7/1675	103/19078	0.810314	1	123053591/123045718/123079989/123167365/123182687/123189489/123090631	LOC123053591/LOC123045718/LOC123079989/LOC123167365/LOC123182687/LOC123189489/LOC123090631	7	5	123053591/123045718/123079989/123182687/123189489	2	123167365/123090631
BP	GO:0009185	ribonucleoside diphosphate metabolic process	7/1675	103/19078	0.810314	1	123053591/123045718/123079989/123167365/123182687/123189489/123090631	LOC123053591/LOC123045718/LOC123079989/LOC123167365/LOC123182687/LOC123189489/LOC123090631	7	5	123053591/123045718/123079989/123182687/123189489	2	123167365/123090631
BP	GO:0042866	pyruvate biosynthetic process	7/1675	103/19078	0.810314	1	123053591/123045718/123079989/123167365/123182687/123189489/123090631	LOC123053591/LOC123045718/LOC123079989/LOC123167365/LOC123182687/LOC123189489/LOC123090631	7	5	123053591/123045718/123079989/123182687/123189489	2	123167365/123090631
BP	GO:0046031	ADP metabolic process	7/1675	103/19078	0.810314	1	123053591/123045718/123079989/123167365/123182687/123189489/123090631	LOC123053591/LOC123045718/LOC123079989/LOC123167365/LOC123182687/LOC123189489/LOC123090631	7	5	123053591/123045718/123079989/123182687/123189489	2	123167365/123090631
BP	GO:0046939	nucleotide phosphorylation	7/1675	103/19078	0.810314	1	123053591/123045718/123079989/123167365/123182687/123189489/123090631	LOC123053591/LOC123045718/LOC123079989/LOC123167365/LOC123182687/LOC123189489/LOC123090631	7	5	123053591/123045718/123079989/123182687/123189489	2	123167365/123090631
BP	GO:0006568	tryptophan metabolic process	2/1675	34/19078	0.812423	1	123123214/123071460	LOC123123214/LOC123071460	2	2	123123214/123071460	0
BP	GO:0006586	indolalkylamine metabolic process	2/1675	34/19078	0.812423	1	123123214/123071460	LOC123123214/LOC123071460	2	2	123123214/123071460	0
BP	GO:0042430	indole-containing compound metabolic process	2/1675	34/19078	0.812423	1	123123214/123071460	LOC123123214/LOC123071460	2	2	123123214/123071460	0
BP	GO:0017148	negative regulation of translation	1/1675	19/19078	0.825675	1	123140706	LOC123140706	1	0		1	123140706
BP	GO:0034249	negative regulation of cellular amide metabolic process	1/1675	19/19078	0.825675	1	123140706	LOC123140706	1	0		1	123140706
BP	GO:0015849	organic acid transport	3/1675	50/19078	0.826948	1	543388/123163773/123150021	LOC543388/LOC123163773/LOC123150021	3	1	543388	2	123163773/123150021
BP	GO:0046942	carboxylic acid transport	3/1675	50/19078	0.826948	1	543388/123163773/123150021	LOC543388/LOC123163773/LOC123150021	3	1	543388	2	123163773/123150021
BP	GO:0006090	pyruvate metabolic process	7/1675	106/19078	0.832797	1	123053591/123045718/123079989/123167365/123182687/123189489/123090631	LOC123053591/LOC123045718/LOC123079989/LOC123167365/LOC123182687/LOC123189489/LOC123090631	7	5	123053591/123045718/123079989/123182687/123189489	2	123167365/123090631
BP	GO:0034220	ion transmembrane transport	16/1675	223/19078	0.834045	1	123121414/123111848/123152478/123159986/123141760/123166399/123134486/123158100/543450/123102567/123121696/123145391/123150115/123164763/123061742/123070377	LOC123121414/LOC123111848/LOC123152478/LOC123159986/LOC123141760/LOC123166399/LOC123134486/LOC123158100/LOC543450/LOC123102567/LOC123121696/LOC123145391/LOC123150115/LOC123164763/LOC123061742/LOC123070377	16	14	123121414/123111848/123159986/123141760/123166399/123134486/123158100/543450/123121696/123145391/123150115/123164763/123061742/123070377	2	123152478/123102567
BP	GO:0006220	pyrimidine nucleotide metabolic process	1/1675	20/19078	0.840996	1	123069137	LOC123069137	1	0		1	123069137
BP	GO:0006221	pyrimidine nucleotide biosynthetic process	1/1675	20/19078	0.840996	1	123069137	LOC123069137	1	0		1	123069137
BP	GO:0042180	cellular ketone metabolic process	1/1675	20/19078	0.840996	1	123071460	LOC123071460	1	1	123071460	0
BP	GO:0042278	purine nucleoside metabolic process	1/1675	20/19078	0.840996	1	123046986	LOC123046986	1	1	123046986	0
BP	GO:0046128	purine ribonucleoside metabolic process	1/1675	20/19078	0.840996	1	123046986	LOC123046986	1	1	123046986	0
BP	GO:1901068	guanosine-containing compound metabolic process	1/1675	20/19078	0.840996	1	123046986	LOC123046986	1	1	123046986	0
BP	GO:0009719	response to endogenous stimulus	14/1675	200/19078	0.84682	1	123094210/123185774/123107065/123089232/123185047/123041842/123124832/123081572/123049095/123116189/123100300/123130722/123169266/123049805	LOC123094210/LOC123185774/LOC123107065/LOC123089232/LOC123185047/LOC123041842/LOC123124832/LOC123081572/LOC123049095/LOC123116189/LOC123100300/LOC123130722/LOC123169266/LOC123049805	14	10	123185774/123107065/123089232/123041842/123081572/123116189/123100300/123130722/123169266/123049805	4	123094210/123185047/123124832/123049095
BP	GO:0009725	response to hormone	14/1675	200/19078	0.84682	1	123094210/123185774/123107065/123089232/123185047/123041842/123124832/123081572/123049095/123116189/123100300/123130722/123169266/123049805	LOC123094210/LOC123185774/LOC123107065/LOC123089232/LOC123185047/LOC123041842/LOC123124832/LOC123081572/LOC123049095/LOC123116189/LOC123100300/LOC123130722/LOC123169266/LOC123049805	14	10	123185774/123107065/123089232/123041842/123081572/123116189/123100300/123130722/123169266/123049805	4	123094210/123185047/123124832/123049095
BP	GO:0010033	response to organic substance	14/1675	200/19078	0.84682	1	123094210/123185774/123107065/123089232/123185047/123041842/123124832/123081572/123049095/123116189/123100300/123130722/123169266/123049805	LOC123094210/LOC123185774/LOC123107065/LOC123089232/LOC123185047/LOC123041842/LOC123124832/LOC123081572/LOC123049095/LOC123116189/LOC123100300/LOC123130722/LOC123169266/LOC123049805	14	10	123185774/123107065/123089232/123041842/123081572/123116189/123100300/123130722/123169266/123049805	4	123094210/123185047/123124832/123049095
BP	GO:0016054	organic acid catabolic process	2/1675	37/19078	0.848052	1	123071460/123088644	LOC123071460/LOC123088644	2	2	123071460/123088644	0
BP	GO:0046395	carboxylic acid catabolic process	2/1675	37/19078	0.848052	1	123071460/123088644	LOC123071460/LOC123088644	2	2	123071460/123088644	0
BP	GO:0000079	regulation of cyclin-dependent protein serine/threonine kinase activity	1/1675	21/19078	0.854971	1	123050156	LOC123050156	1	0		1	123050156
BP	GO:0001932	regulation of protein phosphorylation	1/1675	21/19078	0.854971	1	123050156	LOC123050156	1	0		1	123050156
BP	GO:0007059	chromosome segregation	1/1675	21/19078	0.854971	1	novel.907	-	1	0		1	novel.907
BP	GO:0042325	regulation of phosphorylation	1/1675	21/19078	0.854971	1	123050156	LOC123050156	1	0		1	123050156
BP	GO:0043549	regulation of kinase activity	1/1675	21/19078	0.854971	1	123050156	LOC123050156	1	0		1	123050156
BP	GO:0045859	regulation of protein kinase activity	1/1675	21/19078	0.854971	1	123050156	LOC123050156	1	0		1	123050156
BP	GO:0051338	regulation of transferase activity	1/1675	21/19078	0.854971	1	123050156	LOC123050156	1	0		1	123050156
BP	GO:0071900	regulation of protein serine/threonine kinase activity	1/1675	21/19078	0.854971	1	123050156	LOC123050156	1	0		1	123050156
BP	GO:1904029	regulation of cyclin-dependent protein kinase activity	1/1675	21/19078	0.854971	1	123050156	LOC123050156	1	0		1	123050156
BP	GO:0015711	organic anion transport	3/1675	53/19078	0.855649	1	543388/123163773/123150021	LOC543388/LOC123163773/LOC123150021	3	1	543388	2	123163773/123150021
BP	GO:0010629	negative regulation of gene expression	5/1675	83/19078	0.864121	1	123140706/123156432/123147378/123061483/123086489	LOC123140706/LOC123156432/LOC123147378/LOC123061483/LOC123086489	5	4	123156432/123147378/123061483/123086489	1	123140706
BP	GO:0032269	negative regulation of cellular protein metabolic process	1/1675	22/19078	0.867718	1	123140706	LOC123140706	1	0		1	123140706
BP	GO:0042440	pigment metabolic process	1/1675	22/19078	0.867718	1	123077378	LOC123077378	1	1	123077378	0
BP	GO:0051248	negative regulation of protein metabolic process	1/1675	22/19078	0.867718	1	123140706	LOC123140706	1	0		1	123140706
BP	GO:0006284	base-excision repair	2/1675	40/19078	0.877412	1	123079653/123058754	LOC123079653/LOC123058754	2	0		2	123079653/123058754
BP	GO:0072528	pyrimidine-containing compound biosynthetic process	2/1675	40/19078	0.877412	1	123051558/123069137	LOC123051558/LOC123069137	2	0		2	123051558/123069137
BP	GO:0000041	transition metal ion transport	1/1675	25/19078	0.899625	1	123102567	LOC123102567	1	0		1	123102567
BP	GO:0006270	DNA replication initiation	1/1675	25/19078	0.899625	1	123061267	LOC123061267	1	1	123061267	0
BP	GO:0015693	magnesium ion transport	1/1675	25/19078	0.899625	1	123182620	LOC123182620	1	1	123182620	0
BP	GO:0070838	divalent metal ion transport	1/1675	25/19078	0.899625	1	123182620	LOC123182620	1	1	123182620	0
BP	GO:0072511	divalent inorganic cation transport	1/1675	25/19078	0.899625	1	123182620	LOC123182620	1	1	123182620	0
BP	GO:0045017	glycerolipid biosynthetic process	4/1675	75/19078	0.904817	1	123065590/123068299/123140708/123057498	LOC123065590/LOC123068299/LOC123140708/LOC123057498	4	1	123065590	3	123068299/123140708/123057498
BP	GO:0016042	lipid catabolic process	1/1675	26/19078	0.90845	1	123149837	LOC123149837	1	0		1	123149837
BP	GO:0016571	histone methylation	2/1675	45/19078	0.914955	1	123187691/123180046	LOC123187691/LOC123180046	2	0		2	123187691/123180046
BP	GO:0018022	peptidyl-lysine methylation	2/1675	45/19078	0.914955	1	123187691/123180046	LOC123187691/LOC123180046	2	0		2	123187691/123180046
BP	GO:0034968	histone lysine methylation	2/1675	45/19078	0.914955	1	123187691/123180046	LOC123187691/LOC123180046	2	0		2	123187691/123180046
BP	GO:0019220	regulation of phosphate metabolic process	1/1675	27/19078	0.916498	1	123050156	LOC123050156	1	0		1	123050156
BP	GO:0031399	regulation of protein modification process	1/1675	27/19078	0.916498	1	123050156	LOC123050156	1	0		1	123050156
BP	GO:0051174	regulation of phosphorus metabolic process	1/1675	27/19078	0.916498	1	123050156	LOC123050156	1	0		1	123050156
BP	GO:0055086	nucleobase-containing small molecule metabolic process	25/1675	362/19078	0.917854	1	123045960/123062759/123157472/123053591/123045718/123079989/543100/123167365/123071583/123079922/123189694/123182687/123189489/123104204/123049667/123060798/123069137/123078820/123061742/123061734/123090631/123046986/123070377/123099182/123092316	LOC123045960/LOC123062759/LOC123157472/LOC123053591/LOC123045718/LOC123079989/LOC543100/LOC123167365/LOC123071583/LOC123079922/LOC123189694/LOC123182687/LOC123189489/LOC123104204/LOC123049667/LOC123060798/LOC123069137/LOC123078820/LOC123061742/LOC123061734/LOC123090631/LOC123046986/LOC123070377/LOC123099182/LOC123092316	25	15	123157472/123053591/123045718/123079989/123182687/123189489/123104204/123049667/123060798/123078820/123061742/123061734/123046986/123070377/123092316	10	123045960/123062759/543100/123167365/123071583/123079922/123189694/123069137/123090631/123099182
BP	GO:0000723	telomere maintenance	1/1675	28/19078	0.92384	1	123103631	LOC123103631	1	0		1	123103631
BP	GO:0006417	regulation of translation	1/1675	28/19078	0.92384	1	123140706	LOC123140706	1	0		1	123140706
BP	GO:0010608	posttranscriptional regulation of gene expression	1/1675	28/19078	0.92384	1	123140706	LOC123140706	1	0		1	123140706
BP	GO:0032200	telomere organization	1/1675	28/19078	0.92384	1	123103631	LOC123103631	1	0		1	123103631
BP	GO:0034248	regulation of cellular amide metabolic process	1/1675	28/19078	0.92384	1	123140706	LOC123140706	1	0		1	123140706
BP	GO:0060249	anatomical structure homeostasis	1/1675	28/19078	0.92384	1	123103631	LOC123103631	1	0		1	123103631
BP	GO:0006643	membrane lipid metabolic process	3/1675	64/19078	0.928208	1	123095790/123090780/123087182	LOC123095790/LOC123090780/LOC123087182	3	3	123095790/123090780/123087182	0
BP	GO:0006081	cellular aldehyde metabolic process	1/1675	29/19078	0.930537	1	123053707	LOC123053707	1	1	123053707	0
BP	GO:0033865	nucleoside bisphosphate metabolic process	1/1675	29/19078	0.930537	1	123104204	LOC123104204	1	1	123104204	0
BP	GO:0033875	ribonucleoside bisphosphate metabolic process	1/1675	29/19078	0.930537	1	123104204	LOC123104204	1	1	123104204	0
BP	GO:0034032	purine nucleoside bisphosphate metabolic process	1/1675	29/19078	0.930537	1	123104204	LOC123104204	1	1	123104204	0
BP	GO:0006265	DNA topological change	1/1675	30/19078	0.936645	1	123122365	LOC123122365	1	0		1	123122365
BP	GO:0019359	nicotinamide nucleotide biosynthetic process	7/1675	128/19078	0.939784	1	123053591/123045718/123079989/123167365/123182687/123189489/123090631	LOC123053591/LOC123045718/LOC123079989/LOC123167365/LOC123182687/LOC123189489/LOC123090631	7	5	123053591/123045718/123079989/123182687/123189489	2	123167365/123090631
BP	GO:0019363	pyridine nucleotide biosynthetic process	7/1675	128/19078	0.939784	1	123053591/123045718/123079989/123167365/123182687/123189489/123090631	LOC123053591/LOC123045718/LOC123079989/LOC123167365/LOC123182687/LOC123189489/LOC123090631	7	5	123053591/123045718/123079989/123182687/123189489	2	123167365/123090631
BP	GO:0006778	porphyrin-containing compound metabolic process	1/1675	31/19078	0.942216	1	123077378	LOC123077378	1	1	123077378	0
BP	GO:0009141	nucleoside triphosphate metabolic process	11/1675	187/19078	0.944869	1	123053591/123045718/123079989/123167365/123182687/123189489/123049667/123061742/123090631/123046986/123070377	LOC123053591/LOC123045718/LOC123079989/LOC123167365/LOC123182687/LOC123189489/LOC123049667/LOC123061742/LOC123090631/LOC123046986/LOC123070377	11	9	123053591/123045718/123079989/123182687/123189489/123049667/123061742/123046986/123070377	2	123167365/123090631
BP	GO:0006479	protein methylation	2/1675	51/19078	0.945752	1	123187691/123180046	LOC123187691/LOC123180046	2	0		2	123187691/123180046
BP	GO:0008213	protein alkylation	2/1675	51/19078	0.945752	1	123187691/123180046	LOC123187691/LOC123180046	2	0		2	123187691/123180046
BP	GO:0072525	pyridine-containing compound biosynthetic process	7/1675	134/19078	0.955584	1	123053591/123045718/123079989/123167365/123182687/123189489/123090631	LOC123053591/LOC123045718/LOC123079989/LOC123167365/LOC123182687/LOC123189489/LOC123090631	7	5	123053591/123045718/123079989/123182687/123189489	2	123167365/123090631
BP	GO:0018193	peptidyl-amino acid modification	8/1675	149/19078	0.956042	1	123131889/123044525/123129092/123057458/123064239/123187691/123180046/123128429	LOC123131889/LOC123044525/LOC123129092/LOC123057458/LOC123064239/LOC123187691/LOC123180046/LOC123128429	8	3	123131889/123129092/123128429	5	123044525/123057458/123064239/123187691/123180046
BP	GO:0009144	purine nucleoside triphosphate metabolic process	10/1675	178/19078	0.956078	1	123053591/123045718/123079989/123167365/123182687/123189489/123061742/123090631/123046986/123070377	LOC123053591/LOC123045718/LOC123079989/LOC123167365/LOC123182687/LOC123189489/LOC123061742/LOC123090631/LOC123046986/LOC123070377	10	8	123053591/123045718/123079989/123182687/123189489/123061742/123046986/123070377	2	123167365/123090631
BP	GO:0009199	ribonucleoside triphosphate metabolic process	10/1675	178/19078	0.956078	1	123053591/123045718/123079989/123167365/123182687/123189489/123061742/123090631/123046986/123070377	LOC123053591/LOC123045718/LOC123079989/LOC123167365/LOC123182687/LOC123189489/LOC123061742/LOC123090631/LOC123046986/LOC123070377	10	8	123053591/123045718/123079989/123182687/123189489/123061742/123046986/123070377	2	123167365/123090631
BP	GO:0009205	purine ribonucleoside triphosphate metabolic process	10/1675	178/19078	0.956078	1	123053591/123045718/123079989/123167365/123182687/123189489/123061742/123090631/123046986/123070377	LOC123053591/LOC123045718/LOC123079989/LOC123167365/LOC123182687/LOC123189489/LOC123061742/LOC123090631/LOC123046986/LOC123070377	10	8	123053591/123045718/123079989/123182687/123189489/123061742/123046986/123070377	2	123167365/123090631
BP	GO:0006334	nucleosome assembly	2/1675	54/19078	0.956837	1	123083199/123190010	LOC123083199/LOC123190010	2	2	123083199/123190010	0
BP	GO:0031497	chromatin assembly	2/1675	54/19078	0.956837	1	123083199/123190010	LOC123083199/LOC123190010	2	2	123083199/123190010	0
BP	GO:0032268	regulation of cellular protein metabolic process	2/1675	55/19078	0.960024	1	123140706/123050156	LOC123140706/LOC123050156	2	0		2	123140706/123050156
BP	GO:0009057	macromolecule catabolic process	22/1675	347/19078	0.962064	1	123117018/123125582/123062501/123079648/123069423/123121979/123054895/123077920/123053755/542839/123105923/123071307/123128167/123066054/123050333/123093753/123190737/123054894/123181646/123052101/123098985/123105823	LOC123117018/LOC123125582/LOC123062501/LOC123079648/LOC123069423/LOC123121979/LOC123054895/LOC123077920/LOC123053755/LOC542839/LOC123105923/LOC123071307/LOC123128167/LOC123066054/LOC123050333/LOC123093753/LOC123190737/LOC123054894/LOC123181646/LOC123052101/LOC123098985/LOC123105823	22	22	123117018/123125582/123062501/123079648/123069423/123121979/123054895/123077920/123053755/542839/123105923/123071307/123128167/123066054/123050333/123093753/123190737/123054894/123181646/123052101/123098985/123105823	0
BP	GO:0048519	negative regulation of biological process	6/1675	123/19078	0.964451	1	123140706/123156432/123084804/123147378/123061483/123086489	LOC123140706/LOC123156432/LOC123084804/LOC123147378/LOC123061483/LOC123086489	6	5	123156432/123084804/123147378/123061483/123086489	1	123140706
BP	GO:0034728	nucleosome organization	2/1675	57/19078	0.965734	1	123083199/123190010	LOC123083199/LOC123190010	2	2	123083199/123190010	0
BP	GO:0009123	nucleoside monophosphate metabolic process	10/1675	184/19078	0.966704	1	123053591/123045718/123079989/123167365/123182687/123189489/123061742/123090631/123070377/123092316	LOC123053591/LOC123045718/LOC123079989/LOC123167365/LOC123182687/LOC123189489/LOC123061742/LOC123090631/LOC123070377/LOC123092316	10	8	123053591/123045718/123079989/123182687/123189489/123061742/123070377/123092316	2	123167365/123090631
BP	GO:0009126	purine nucleoside monophosphate metabolic process	10/1675	184/19078	0.966704	1	123053591/123045718/123079989/123167365/123182687/123189489/123061742/123090631/123070377/123092316	LOC123053591/LOC123045718/LOC123079989/LOC123167365/LOC123182687/LOC123189489/LOC123061742/LOC123090631/LOC123070377/LOC123092316	10	8	123053591/123045718/123079989/123182687/123189489/123061742/123070377/123092316	2	123167365/123090631
BP	GO:0009161	ribonucleoside monophosphate metabolic process	10/1675	184/19078	0.966704	1	123053591/123045718/123079989/123167365/123182687/123189489/123061742/123090631/123070377/123092316	LOC123053591/LOC123045718/LOC123079989/LOC123167365/LOC123182687/LOC123189489/LOC123061742/LOC123090631/LOC123070377/LOC123092316	10	8	123053591/123045718/123079989/123182687/123189489/123061742/123070377/123092316	2	123167365/123090631
BP	GO:0009167	purine ribonucleoside monophosphate metabolic process	10/1675	184/19078	0.966704	1	123053591/123045718/123079989/123167365/123182687/123189489/123061742/123090631/123070377/123092316	LOC123053591/LOC123045718/LOC123079989/LOC123167365/LOC123182687/LOC123189489/LOC123061742/LOC123090631/LOC123070377/LOC123092316	10	8	123053591/123045718/123079989/123182687/123189489/123061742/123070377/123092316	2	123167365/123090631
BP	GO:0006576	cellular biogenic amine metabolic process	3/1675	76/19078	0.968067	1	123123214/123071460/123189472	LOC123123214/LOC123071460/LOC123189472	3	3	123123214/123071460/123189472	0
BP	GO:0044106	cellular amine metabolic process	3/1675	76/19078	0.968067	1	123123214/123071460/123189472	LOC123123214/LOC123071460/LOC123189472	3	3	123123214/123071460/123189472	0
BP	GO:0009124	nucleoside monophosphate biosynthetic process	8/1675	157/19078	0.97059	1	123053591/123045718/123079989/123167365/123182687/123189489/123090631/123092316	LOC123053591/LOC123045718/LOC123079989/LOC123167365/LOC123182687/LOC123189489/LOC123090631/LOC123092316	8	6	123053591/123045718/123079989/123182687/123189489/123092316	2	123167365/123090631
BP	GO:0009127	purine nucleoside monophosphate biosynthetic process	8/1675	157/19078	0.97059	1	123053591/123045718/123079989/123167365/123182687/123189489/123090631/123092316	LOC123053591/LOC123045718/LOC123079989/LOC123167365/LOC123182687/LOC123189489/LOC123090631/LOC123092316	8	6	123053591/123045718/123079989/123182687/123189489/123092316	2	123167365/123090631
BP	GO:0009156	ribonucleoside monophosphate biosynthetic process	8/1675	157/19078	0.97059	1	123053591/123045718/123079989/123167365/123182687/123189489/123090631/123092316	LOC123053591/LOC123045718/LOC123079989/LOC123167365/LOC123182687/LOC123189489/LOC123090631/LOC123092316	8	6	123053591/123045718/123079989/123182687/123189489/123092316	2	123167365/123090631
BP	GO:0009168	purine ribonucleoside monophosphate biosynthetic process	8/1675	157/19078	0.97059	1	123053591/123045718/123079989/123167365/123182687/123189489/123090631/123092316	LOC123053591/LOC123045718/LOC123079989/LOC123167365/LOC123182687/LOC123189489/LOC123090631/LOC123092316	8	6	123053591/123045718/123079989/123182687/123189489/123092316	2	123167365/123090631
BP	GO:0006333	chromatin assembly or disassembly	2/1675	59/19078	0.970654	1	123083199/123190010	LOC123083199/LOC123190010	2	2	123083199/123190010	0
BP	GO:0009150	purine ribonucleotide metabolic process	12/1675	216/19078	0.971135	1	123053591/123045718/123079989/123167365/123182687/123189489/123104204/123061742/123090631/123046986/123070377/123092316	LOC123053591/LOC123045718/LOC123079989/LOC123167365/LOC123182687/LOC123189489/LOC123104204/LOC123061742/LOC123090631/LOC123046986/LOC123070377/LOC123092316	12	10	123053591/123045718/123079989/123182687/123189489/123104204/123061742/123046986/123070377/123092316	2	123167365/123090631
BP	GO:0009259	ribonucleotide metabolic process	12/1675	216/19078	0.971135	1	123053591/123045718/123079989/123167365/123182687/123189489/123104204/123061742/123090631/123046986/123070377/123092316	LOC123053591/LOC123045718/LOC123079989/LOC123167365/LOC123182687/LOC123189489/LOC123104204/LOC123061742/LOC123090631/LOC123046986/LOC123070377/LOC123092316	12	10	123053591/123045718/123079989/123182687/123189489/123104204/123061742/123046986/123070377/123092316	2	123167365/123090631
BP	GO:0006323	DNA packaging	2/1675	60/19078	0.972851	1	123083199/123190010	LOC123083199/LOC123190010	2	2	123083199/123190010	0
BP	GO:0065004	protein-DNA complex assembly	2/1675	60/19078	0.972851	1	123083199/123190010	LOC123083199/LOC123190010	2	2	123083199/123190010	0
BP	GO:0022607	cellular component assembly	13/1675	232/19078	0.97321	1	123113352/123083199/543124/123105056/123181803/123177012/123085635/123097711/123099419/123086676/123091299/123190010/123062261	LOC123113352/LOC123083199/LOC543124/LOC123105056/LOC123181803/LOC123177012/LOC123085635/LOC123097711/LOC123099419/LOC123086676/LOC123091299/LOC123190010/LOC123062261	13	13	123113352/123083199/543124/123105056/123181803/123177012/123085635/123097711/123099419/123086676/123091299/123190010/123062261	0
BP	GO:0046034	ATP metabolic process	9/1675	175/19078	0.974755	1	123053591/123045718/123079989/123167365/123182687/123189489/123061742/123090631/123070377	LOC123053591/LOC123045718/LOC123079989/LOC123167365/LOC123182687/LOC123189489/LOC123061742/LOC123090631/LOC123070377	9	7	123053591/123045718/123079989/123182687/123189489/123061742/123070377	2	123167365/123090631
BP	GO:0048523	negative regulation of cellular process	2/1675	61/19078	0.974889	1	123140706/123084804	LOC123140706/LOC123084804	2	1	123084804	1	123140706
BP	GO:0051246	regulation of protein metabolic process	2/1675	61/19078	0.974889	1	123140706/123050156	LOC123140706/LOC123050156	2	0		2	123140706/123050156
BP	GO:0019362	pyridine nucleotide metabolic process	7/1675	145/19078	0.975193	1	123053591/123045718/123079989/123167365/123182687/123189489/123090631	LOC123053591/LOC123045718/LOC123079989/LOC123167365/LOC123182687/LOC123189489/LOC123090631	7	5	123053591/123045718/123079989/123182687/123189489	2	123167365/123090631
BP	GO:0046496	nicotinamide nucleotide metabolic process	7/1675	145/19078	0.975193	1	123053591/123045718/123079989/123167365/123182687/123189489/123090631	LOC123053591/LOC123045718/LOC123079989/LOC123167365/LOC123182687/LOC123189489/LOC123090631	7	5	123053591/123045718/123079989/123182687/123189489	2	123167365/123090631
BP	GO:0033013	tetrapyrrole metabolic process	2/1675	62/19078	0.976779	1	123077378/123136200	LOC123077378/LOC123136200	2	1	123077378	1	123136200
BP	GO:0071824	protein-DNA complex subunit organization	2/1675	63/19078	0.978531	1	123083199/123190010	LOC123083199/LOC123190010	2	2	123083199/123190010	0
BP	GO:1902600	proton transmembrane transport	5/1675	116/19078	0.978818	1	123158100/543450/123164763/123061742/123070377	LOC123158100/LOC543450/LOC123164763/LOC123061742/LOC123070377	5	5	123158100/543450/123164763/123061742/123070377	0
BP	GO:0006733	oxidoreduction coenzyme metabolic process	7/1675	148/19078	0.978944	1	123053591/123045718/123079989/123167365/123182687/123189489/123090631	LOC123053591/LOC123045718/LOC123079989/LOC123167365/LOC123182687/LOC123189489/LOC123090631	7	5	123053591/123045718/123079989/123182687/123189489	2	123167365/123090631
BP	GO:0006754	ATP biosynthetic process	7/1675	148/19078	0.978944	1	123053591/123045718/123079989/123167365/123182687/123189489/123090631	LOC123053591/LOC123045718/LOC123079989/LOC123167365/LOC123182687/LOC123189489/LOC123090631	7	5	123053591/123045718/123079989/123182687/123189489	2	123167365/123090631
BP	GO:0009142	nucleoside triphosphate biosynthetic process	7/1675	148/19078	0.978944	1	123053591/123045718/123079989/123167365/123182687/123189489/123090631	LOC123053591/LOC123045718/LOC123079989/LOC123167365/LOC123182687/LOC123189489/LOC123090631	7	5	123053591/123045718/123079989/123182687/123189489	2	123167365/123090631
BP	GO:0009145	purine nucleoside triphosphate biosynthetic process	7/1675	148/19078	0.978944	1	123053591/123045718/123079989/123167365/123182687/123189489/123090631	LOC123053591/LOC123045718/LOC123079989/LOC123167365/LOC123182687/LOC123189489/LOC123090631	7	5	123053591/123045718/123079989/123182687/123189489	2	123167365/123090631
BP	GO:0009201	ribonucleoside triphosphate biosynthetic process	7/1675	148/19078	0.978944	1	123053591/123045718/123079989/123167365/123182687/123189489/123090631	LOC123053591/LOC123045718/LOC123079989/LOC123167365/LOC123182687/LOC123189489/LOC123090631	7	5	123053591/123045718/123079989/123182687/123189489	2	123167365/123090631
BP	GO:0009206	purine ribonucleoside triphosphate biosynthetic process	7/1675	148/19078	0.978944	1	123053591/123045718/123079989/123167365/123182687/123189489/123090631	LOC123053591/LOC123045718/LOC123079989/LOC123167365/LOC123182687/LOC123189489/LOC123090631	7	5	123053591/123045718/123079989/123182687/123189489	2	123167365/123090631
BP	GO:0009309	amine biosynthetic process	1/1675	42/19078	0.979013	1	123189472	LOC123189472	1	1	123189472	0
BP	GO:0042401	cellular biogenic amine biosynthetic process	1/1675	42/19078	0.979013	1	123189472	LOC123189472	1	1	123189472	0
BP	GO:0008654	phospholipid biosynthetic process	3/1675	82/19078	0.979019	1	123155757/123163916/100415864	LOC123155757/LOC123163916/LOC100415864	3	3	123155757/123163916/100415864	0
BP	GO:0072524	pyridine-containing compound metabolic process	7/1675	151/19078	0.982165	1	123053591/123045718/123079989/123167365/123182687/123189489/123090631	LOC123053591/LOC123045718/LOC123079989/LOC123167365/LOC123182687/LOC123189489/LOC123090631	7	5	123053591/123045718/123079989/123182687/123189489	2	123167365/123090631
BP	GO:0009152	purine ribonucleotide biosynthetic process	8/1675	167/19078	0.982574	1	123053591/123045718/123079989/123167365/123182687/123189489/123090631/123092316	LOC123053591/LOC123045718/LOC123079989/LOC123167365/LOC123182687/LOC123189489/LOC123090631/LOC123092316	8	6	123053591/123045718/123079989/123182687/123189489/123092316	2	123167365/123090631
BP	GO:0009260	ribonucleotide biosynthetic process	8/1675	167/19078	0.982574	1	123053591/123045718/123079989/123167365/123182687/123189489/123090631/123092316	LOC123053591/LOC123045718/LOC123079989/LOC123167365/LOC123182687/LOC123189489/LOC123090631/LOC123092316	8	6	123053591/123045718/123079989/123182687/123189489/123092316	2	123167365/123090631
BP	GO:0046390	ribose phosphate biosynthetic process	8/1675	167/19078	0.982574	1	123053591/123045718/123079989/123167365/123182687/123189489/123090631/123092316	LOC123053591/LOC123045718/LOC123079989/LOC123167365/LOC123182687/LOC123189489/LOC123090631/LOC123092316	8	6	123053591/123045718/123079989/123182687/123189489/123092316	2	123167365/123090631
BP	GO:0018205	peptidyl-lysine modification	2/1675	66/19078	0.983051	1	123187691/123180046	LOC123187691/LOC123180046	2	0		2	123187691/123180046
BP	GO:0006163	purine nucleotide metabolic process	12/1675	229/19078	0.984086	1	123053591/123045718/123079989/123167365/123182687/123189489/123104204/123061742/123090631/123046986/123070377/123092316	LOC123053591/LOC123045718/LOC123079989/LOC123167365/LOC123182687/LOC123189489/LOC123104204/LOC123061742/LOC123090631/LOC123046986/LOC123070377/LOC123092316	12	10	123053591/123045718/123079989/123182687/123189489/123104204/123061742/123046986/123070377/123092316	2	123167365/123090631
BP	GO:0019693	ribose phosphate metabolic process	12/1675	233/19078	0.986835	1	123053591/123045718/123079989/123167365/123182687/123189489/123104204/123061742/123090631/123046986/123070377/123092316	LOC123053591/LOC123045718/LOC123079989/LOC123167365/LOC123182687/LOC123189489/LOC123104204/LOC123061742/LOC123090631/LOC123046986/LOC123070377/LOC123092316	12	10	123053591/123045718/123079989/123182687/123189489/123104204/123061742/123046986/123070377/123092316	2	123167365/123090631
BP	GO:0072521	purine-containing compound metabolic process	12/1675	233/19078	0.986835	1	123053591/123045718/123079989/123167365/123182687/123189489/123104204/123061742/123090631/123046986/123070377/123092316	LOC123053591/LOC123045718/LOC123079989/LOC123167365/LOC123182687/LOC123189489/LOC123104204/LOC123061742/LOC123090631/LOC123046986/LOC123070377/LOC123092316	12	10	123053591/123045718/123079989/123182687/123189489/123104204/123061742/123046986/123070377/123092316	2	123167365/123090631
BP	GO:0016569	covalent chromatin modification	2/1675	72/19078	0.989486	1	123187691/123180046	LOC123187691/LOC123180046	2	0		2	123187691/123180046
BP	GO:0016570	histone modification	2/1675	72/19078	0.989486	1	123187691/123180046	LOC123187691/LOC123180046	2	0		2	123187691/123180046
BP	GO:0043414	macromolecule methylation	2/1675	73/19078	0.990296	1	123187691/123180046	LOC123187691/LOC123180046	2	0		2	123187691/123180046
BP	GO:0071103	DNA conformation change	3/1675	93/19078	0.990488	1	123083199/123190010/123122365	LOC123083199/LOC123190010/LOC123122365	3	2	123083199/123190010	1	123122365
BP	GO:0050790	regulation of catalytic activity	1/1675	51/19078	0.990841	1	123050156	LOC123050156	1	0		1	123050156
BP	GO:0065009	regulation of molecular function	1/1675	51/19078	0.990841	1	123050156	LOC123050156	1	0		1	123050156
BP	GO:0006164	purine nucleotide biosynthetic process	8/1675	180/19078	0.991449	1	123053591/123045718/123079989/123167365/123182687/123189489/123090631/123092316	LOC123053591/LOC123045718/LOC123079989/LOC123167365/LOC123182687/LOC123189489/LOC123090631/LOC123092316	8	6	123053591/123045718/123079989/123182687/123189489/123092316	2	123167365/123090631
BP	GO:0072522	purine-containing compound biosynthetic process	8/1675	184/19078	0.993176	1	123053591/123045718/123079989/123167365/123182687/123189489/123090631/123092316	LOC123053591/LOC123045718/LOC123079989/LOC123167365/LOC123182687/LOC123189489/LOC123090631/LOC123092316	8	6	123053591/123045718/123079989/123182687/123189489/123092316	2	123167365/123090631
BP	GO:0016567	protein ubiquitination	7/1675	169/19078	0.993668	1	123121415/123103637/123046695/123069358/123111877/123087943/123169178	LOC123121415/LOC123103637/LOC123046695/LOC123069358/LOC123111877/LOC123087943/LOC123169178	7	4	123121415/123103637/123069358/123111877	3	123046695/123087943/123169178
BP	GO:0033014	tetrapyrrole biosynthetic process	1/1675	56/19078	0.994223	1	123136200	LOC123136200	1	0		1	123136200
BP	GO:0051726	regulation of cell cycle	1/1675	56/19078	0.994223	1	123050156	LOC123050156	1	0		1	123050156
BP	GO:0032259	methylation	3/1675	100/19078	0.99432	1	123113468/123187691/123180046	LOC123113468/LOC123187691/LOC123180046	3	1	123113468	2	123187691/123180046
BP	GO:0006753	nucleoside phosphate metabolic process	16/1675	311/19078	0.994544	1	123157472/123053591/123045718/123079989/123167365/123182687/123189489/123104204/123049667/123069137/123061742/123090631/123046986/123070377/123099182/123092316	LOC123157472/LOC123053591/LOC123045718/LOC123079989/LOC123167365/LOC123182687/LOC123189489/LOC123104204/LOC123049667/LOC123069137/LOC123061742/LOC123090631/LOC123046986/LOC123070377/LOC123099182/LOC123092316	16	12	123157472/123053591/123045718/123079989/123182687/123189489/123104204/123049667/123061742/123046986/123070377/123092316	4	123167365/123069137/123090631/123099182
BP	GO:0032446	protein modification by small protein conjugation	7/1675	172/19078	0.994704	1	123121415/123103637/123046695/123069358/123111877/123087943/123169178	LOC123121415/LOC123103637/LOC123046695/LOC123069358/LOC123111877/LOC123087943/LOC123169178	7	4	123121415/123103637/123069358/123111877	3	123046695/123087943/123169178
BP	GO:0006418	tRNA aminoacylation for protein translation	7/1675	173/19078	0.995012	1	123181686/123164622/123157170/123085031/123098306/123095949/123052821	LOC123181686/LOC123164622/LOC123157170/LOC123085031/LOC123098306/LOC123095949/LOC123052821	7	2	123157170/123095949	5	123181686/123164622/123085031/123098306/123052821
BP	GO:0009117	nucleotide metabolic process	15/1675	302/19078	0.995868	1	123157472/123053591/123045718/123079989/123167365/123182687/123189489/123104204/123069137/123061742/123090631/123046986/123070377/123099182/123092316	LOC123157472/LOC123053591/LOC123045718/LOC123079989/LOC123167365/LOC123182687/LOC123189489/LOC123104204/LOC123069137/LOC123061742/LOC123090631/LOC123046986/LOC123070377/LOC123099182/LOC123092316	15	11	123157472/123053591/123045718/123079989/123182687/123189489/123104204/123061742/123046986/123070377/123092316	4	123167365/123069137/123090631/123099182
BP	GO:0006260	DNA replication	5/1675	143/19078	0.996231	1	123084804/123062734/123149113/123079889/123061267	LOC123084804/LOC123062734/LOC123149113/LOC123079889/LOC123061267	5	4	123084804/123062734/123079889/123061267	1	123149113
BP	GO:0006325	chromatin organization	5/1675	145/19078	0.996702	1	123083199/123190010/123187691/123180046/123103540	LOC123083199/LOC123190010/LOC123187691/LOC123180046/LOC123103540	5	3	123083199/123190010/123103540	2	123187691/123180046
BP	GO:0006887	exocytosis	4/1675	127/19078	0.996787	1	123151634/123091476/123164187/123191107	LOC123151634/LOC123091476/LOC123164187/LOC123191107	4	3	123151634/123091476/123191107	1	123164187
BP	GO:0032940	secretion by cell	4/1675	127/19078	0.996787	1	123151634/123091476/123164187/123191107	LOC123151634/LOC123091476/LOC123164187/LOC123191107	4	3	123151634/123091476/123191107	1	123164187
BP	GO:0046486	glycerolipid metabolic process	5/1675	147/19078	0.997115	1	123065590/123068299/123140708/123057498/123101920	LOC123065590/LOC123068299/LOC123140708/LOC123057498/LOC123101920	5	2	123065590/123101920	3	123068299/123140708/123057498
BP	GO:0043038	amino acid activation	7/1675	183/19078	0.997286	1	123181686/123164622/123157170/123085031/123098306/123095949/123052821	LOC123181686/LOC123164622/LOC123157170/LOC123085031/LOC123098306/LOC123095949/LOC123052821	7	2	123157170/123095949	5	123181686/123164622/123085031/123098306/123052821
BP	GO:0043039	tRNA aminoacylation	7/1675	183/19078	0.997286	1	123181686/123164622/123157170/123085031/123098306/123095949/123052821	LOC123181686/LOC123164622/LOC123157170/LOC123085031/LOC123098306/LOC123095949/LOC123052821	7	2	123157170/123095949	5	123181686/123164622/123085031/123098306/123052821
BP	GO:0009165	nucleotide biosynthetic process	10/1675	234/19078	0.997489	1	123053591/123045718/123079989/123167365/123182687/123189489/123069137/123090631/123099182/123092316	LOC123053591/LOC123045718/LOC123079989/LOC123167365/LOC123182687/LOC123189489/LOC123069137/LOC123090631/LOC123099182/LOC123092316	10	6	123053591/123045718/123079989/123182687/123189489/123092316	4	123167365/123069137/123090631/123099182
BP	GO:1901293	nucleoside phosphate biosynthetic process	10/1675	234/19078	0.997489	1	123053591/123045718/123079989/123167365/123182687/123189489/123069137/123090631/123099182/123092316	LOC123053591/LOC123045718/LOC123079989/LOC123167365/LOC123182687/LOC123189489/LOC123069137/LOC123090631/LOC123099182/LOC123092316	10	6	123053591/123045718/123079989/123182687/123189489/123092316	4	123167365/123069137/123090631/123099182
BP	GO:1901565	organonitrogen compound catabolic process	15/1675	313/19078	0.997584	1	123117018/123125582/123062501/123079648/123121979/123053755/542839/123071307/123071460/123077378/123066054/123078820/123061734/123088644/123105823	LOC123117018/LOC123125582/LOC123062501/LOC123079648/LOC123121979/LOC123053755/LOC542839/LOC123071307/LOC123071460/LOC123077378/LOC123066054/LOC123078820/LOC123061734/LOC123088644/LOC123105823	15	15	123117018/123125582/123062501/123079648/123121979/123053755/542839/123071307/123071460/123077378/123066054/123078820/123061734/123088644/123105823	0
BP	GO:0090407	organophosphate biosynthetic process	17/1675	345/19078	0.997777	1	123155757/123163916/123053591/123045718/123079989/123167365/100415864/123182687/123189489/123051558/123069137/123090631/123121368/123116104/123046986/123099182/123092316	LOC123155757/LOC123163916/LOC123053591/LOC123045718/LOC123079989/LOC123167365/LOC100415864/LOC123182687/LOC123189489/LOC123051558/LOC123069137/LOC123090631/LOC123121368/LOC123116104/LOC123046986/LOC123099182/LOC123092316	17	12	123155757/123163916/123053591/123045718/123079989/100415864/123182687/123189489/123121368/123116104/123046986/123092316	5	123167365/123051558/123069137/123090631/123099182
BP	GO:0006928	movement of cell or subcellular component	5/1675	157/19078	0.998538	1	123061001/123078073/123149406/123096898/123141088	LOC123061001/LOC123078073/LOC123149406/LOC123096898/LOC123141088	5	3	123149406/123096898/123141088	2	123061001/123078073
BP	GO:0007018	microtubule-based movement	5/1675	157/19078	0.998538	1	123061001/123078073/123149406/123096898/123141088	LOC123061001/LOC123078073/LOC123149406/LOC123096898/LOC123141088	5	3	123149406/123096898/123141088	2	123061001/123078073
BP	GO:0006397	mRNA processing	3/1675	118/19078	0.998544	1	123151266/123160920/123165686	LOC123151266/LOC123160920/LOC123165686	3	3	123151266/123160920/123165686	0
BP	GO:0046903	secretion	4/1675	143/19078	0.998982	1	123151634/123091476/123164187/123191107	LOC123151634/LOC123091476/LOC123164187/LOC123191107	4	3	123151634/123091476/123191107	1	123164187
BP	GO:0006486	protein glycosylation	3/1675	128/19078	0.999329	1	123107076/123105501/123160236	LOC123107076/LOC123105501/LOC123160236	3	3	123107076/123105501/123160236	0
BP	GO:0009100	glycoprotein metabolic process	3/1675	128/19078	0.999329	1	123107076/123105501/123160236	LOC123107076/LOC123105501/LOC123160236	3	3	123107076/123105501/123160236	0
BP	GO:0009101	glycoprotein biosynthetic process	3/1675	128/19078	0.999329	1	123107076/123105501/123160236	LOC123107076/LOC123105501/LOC123160236	3	3	123107076/123105501/123160236	0
BP	GO:0043413	macromolecule glycosylation	3/1675	128/19078	0.999329	1	123107076/123105501/123160236	LOC123107076/LOC123105501/LOC123160236	3	3	123107076/123105501/123160236	0
BP	GO:0044248	cellular catabolic process	25/1675	498/19078	0.999534	1	123117018/123125582/123157472/123053591/123045718/123079989/123167365/123121979/123054895/123053755/542839/123182687/123189489/123071460/123077378/123066054/123049667/123050333/123190737/123078820/123054894/123061734/123090631/123088644/123105823	LOC123117018/LOC123125582/LOC123157472/LOC123053591/LOC123045718/LOC123079989/LOC123167365/LOC123121979/LOC123054895/LOC123053755/LOC542839/LOC123182687/LOC123189489/LOC123071460/LOC123077378/LOC123066054/LOC123049667/LOC123050333/LOC123190737/LOC123078820/LOC123054894/LOC123061734/LOC123090631/LOC123088644/LOC123105823	25	23	123117018/123125582/123157472/123053591/123045718/123079989/123121979/123054895/123053755/542839/123182687/123189489/123071460/123077378/123066054/123049667/123050333/123190737/123078820/123054894/123061734/123088644/123105823	2	123167365/123090631
BP	GO:0070085	glycosylation	3/1675	136/19078	0.999642	1	123107076/123105501/123160236	LOC123107076/LOC123105501/LOC123160236	3	3	123107076/123105501/123160236	0
BP	GO:0016071	mRNA metabolic process	3/1675	138/19078	0.999694	1	123151266/123160920/123165686	LOC123151266/LOC123160920/LOC123165686	3	3	123151266/123160920/123165686	0
BP	GO:0007017	microtubule-based process	5/1675	181/19078	0.999729	1	123061001/123078073/123149406/123096898/123141088	LOC123061001/LOC123078073/LOC123149406/LOC123096898/LOC123141088	5	3	123149406/123096898/123141088	2	123061001/123078073
BP	GO:0007049	cell cycle	1/1675	91/19078	0.999771	1	123050156	LOC123050156	1	0		1	123050156
BP	GO:0006644	phospholipid metabolic process	4/1675	170/19078	0.999864	1	123155757/123163916/100415864/123101920	LOC123155757/LOC123163916/LOC100415864/LOC123101920	4	4	123155757/123163916/100415864/123101920	0
BP	GO:0051276	chromosome organization	7/1675	237/19078	0.99992	1	123083199/123103631/123190010/123122365/123187691/123180046/123103540	LOC123083199/LOC123103631/LOC123190010/LOC123122365/LOC123187691/LOC123180046/LOC123103540	7	3	123083199/123190010/123103540	4	123103631/123122365/123187691/123180046
BP	GO:0006457	protein folding	2/1675	132/19078	0.999929	1	123062884/100682521	LOC123062884/LOC100682521	2	1	100682521	1	123062884
BP	GO:0034622	cellular protein-containing complex assembly	2/1675	136/19078	0.999949	1	123083199/123190010	LOC123083199/LOC123190010	2	2	123083199/123190010	0
BP	GO:0046488	phosphatidylinositol metabolic process	1/1675	112/19078	0.999967	1	123101920	LOC123101920	1	1	123101920	0
BP	GO:0006352	DNA-templated transcription, initiation	1/1675	117/19078	0.999979	1	123183344	LOC123183344	1	1	123183344	0
BP	GO:0044085	cellular component biogenesis	13/1675	368/19078	0.999982	1	123113352/123083199/543124/123105056/123181803/123177012/123085635/123097711/123099419/123086676/123091299/123190010/123062261	LOC123113352/LOC123083199/LOC543124/LOC123105056/LOC123181803/LOC123177012/LOC123085635/LOC123097711/LOC123099419/LOC123086676/LOC123091299/LOC123190010/LOC123062261	13	13	123113352/123083199/543124/123105056/123181803/123177012/123085635/123097711/123099419/123086676/123091299/123190010/123062261	0
BP	GO:0006650	glycerophospholipid metabolic process	1/1675	121/19078	0.999986	1	123101920	LOC123101920	1	1	123101920	0
BP	GO:0070647	protein modification by small protein conjugation or removal	7/1675	265/19078	0.999989	1	123121415/123103637/123046695/123069358/123111877/123087943/123169178	LOC123121415/LOC123103637/LOC123046695/LOC123069358/LOC123111877/LOC123087943/LOC123169178	7	4	123121415/123103637/123069358/123111877	3	123046695/123087943/123169178
BP	GO:0065003	protein-containing complex assembly	2/1675	155/19078	0.99999	1	123083199/123190010	LOC123083199/LOC123190010	2	2	123083199/123190010	0
BP	GO:1901137	carbohydrate derivative biosynthetic process	11/1675	360/19078	0.999997	1	123053591/123045718/123079989/123167365/123182687/123189489/123090631/123107076/123105501/123160236/123092316	LOC123053591/LOC123045718/LOC123079989/LOC123167365/LOC123182687/LOC123189489/LOC123090631/LOC123107076/LOC123105501/LOC123160236/LOC123092316	11	9	123053591/123045718/123079989/123182687/123189489/123107076/123105501/123160236/123092316	2	123167365/123090631
BP	GO:0030163	protein catabolic process	4/1675	222/19078	0.999998	1	123062501/123079648/123071307/123066054	LOC123062501/LOC123079648/LOC123071307/LOC123066054	4	4	123062501/123079648/123071307/123066054	0
BP	GO:0006399	tRNA metabolic process	7/1675	293/19078	0.999999	1	123181686/123164622/123157170/123085031/123098306/123095949/123052821	LOC123181686/LOC123164622/LOC123157170/LOC123085031/LOC123098306/LOC123095949/LOC123052821	7	2	123157170/123095949	5	123181686/123164622/123085031/123098306/123052821
BP	GO:0044265	cellular macromolecule catabolic process	5/1675	261/19078	0.999999	1	123054895/123066054/123050333/123190737/123054894	LOC123054895/LOC123066054/LOC123050333/LOC123190737/LOC123054894	5	5	123054895/123066054/123050333/123190737/123054894	0
BP	GO:0043933	protein-containing complex subunit organization	2/1675	188/19078	0.999999	1	123083199/123190010	LOC123083199/LOC123190010	2	2	123083199/123190010	0
BP	GO:0006974	cellular response to DNA damage stimulus	3/1675	235/19078	1	1	123084804/123079653/123058754	LOC123084804/LOC123079653/LOC123058754	3	1	123084804	2	123079653/123058754
BP	GO:0033554	cellular response to stress	3/1675	235/19078	1	1	123084804/123079653/123058754	LOC123084804/LOC123079653/LOC123058754	3	1	123084804	2	123079653/123058754
BP	GO:0006259	DNA metabolic process	13/1675	453/19078	1	1	123084804/123054895/123103631/123050333/123190737/123062734/123054894/123079653/123149113/123122365/123079889/123061267/123058754	LOC123084804/LOC123054895/LOC123103631/LOC123050333/LOC123190737/LOC123062734/LOC123054894/LOC123079653/LOC123149113/LOC123122365/LOC123079889/LOC123061267/LOC123058754	13	8	123084804/123054895/123050333/123190737/123062734/123054894/123079889/123061267	5	123103631/123079653/123149113/123122365/123058754
BP	GO:0006511	ubiquitin-dependent protein catabolic process	1/1675	179/19078	1	1	123066054	LOC123066054	1	1	123066054	0
BP	GO:0019941	modification-dependent protein catabolic process	1/1675	179/19078	1	1	123066054	LOC123066054	1	1	123066054	0
BP	GO:0043632	modification-dependent macromolecule catabolic process	1/1675	179/19078	1	1	123066054	LOC123066054	1	1	123066054	0
BP	GO:0006886	intracellular protein transport	4/1675	272/19078	1	1	123069738/123157680/123165990/123147636	LOC123069738/LOC123157680/LOC123165990/LOC123147636	4	4	123069738/123157680/123165990/123147636	0
BP	GO:0006281	DNA repair	2/1675	222/19078	1	1	123079653/123058754	LOC123079653/LOC123058754	2	0		2	123079653/123058754
BP	GO:0006996	organelle organization	7/1675	359/19078	1	1	123083199/123103631/123190010/123122365/123187691/123180046/123103540	LOC123083199/LOC123103631/LOC123190010/LOC123122365/LOC123187691/LOC123180046/LOC123103540	7	3	123083199/123190010/123103540	4	123103631/123122365/123187691/123180046
BP	GO:0034613	cellular protein localization	4/1675	290/19078	1	1	123069738/123157680/123165990/123147636	LOC123069738/LOC123157680/LOC123165990/LOC123147636	4	4	123069738/123157680/123165990/123147636	0
BP	GO:0070727	cellular macromolecule localization	4/1675	290/19078	1	1	123069738/123157680/123165990/123147636	LOC123069738/LOC123157680/LOC123165990/LOC123147636	4	4	123069738/123157680/123165990/123147636	0
BP	GO:0034660	ncRNA metabolic process	7/1675	370/19078	1	1	123181686/123164622/123157170/123085031/123098306/123095949/123052821	LOC123181686/LOC123164622/LOC123157170/LOC123085031/LOC123098306/LOC123095949/LOC123052821	7	2	123157170/123095949	5	123181686/123164622/123085031/123098306/123052821
BP	GO:0044257	cellular protein catabolic process	1/1675	210/19078	1	1	123066054	LOC123066054	1	1	123066054	0
BP	GO:0051603	proteolysis involved in cellular protein catabolic process	1/1675	210/19078	1	1	123066054	LOC123066054	1	1	123066054	0
BP	GO:0015031	protein transport	7/1675	373/19078	1	1	123069738/123157680/123165990/123147636/123062884/123128078/123145171	LOC123069738/LOC123157680/LOC123165990/LOC123147636/LOC123062884/LOC123128078/LOC123145171	7	6	123069738/123157680/123165990/123147636/123128078/123145171	1	123062884
BP	GO:0015833	peptide transport	7/1675	373/19078	1	1	123069738/123157680/123165990/123147636/123062884/123128078/123145171	LOC123069738/LOC123157680/LOC123165990/LOC123147636/LOC123062884/LOC123128078/LOC123145171	7	6	123069738/123157680/123165990/123147636/123128078/123145171	1	123062884
BP	GO:0042886	amide transport	7/1675	373/19078	1	1	123069738/123157680/123165990/123147636/123062884/123128078/123145171	LOC123069738/LOC123157680/LOC123165990/LOC123147636/LOC123062884/LOC123128078/LOC123145171	7	6	123069738/123157680/123165990/123147636/123128078/123145171	1	123062884
BP	GO:0045184	establishment of protein localization	7/1675	376/19078	1	1	123069738/123157680/123165990/123147636/123062884/123128078/123145171	LOC123069738/LOC123157680/LOC123165990/LOC123147636/LOC123062884/LOC123128078/LOC123145171	7	6	123069738/123157680/123165990/123147636/123128078/123145171	1	123062884
BP	GO:0071705	nitrogen compound transport	10/1675	442/19078	1	1	123069738/123157680/123165990/123159888/123147636/123130649/123062884/123128078/123145171/123144698	LOC123069738/LOC123157680/LOC123165990/LOC123159888/LOC123147636/LOC123130649/LOC123062884/LOC123128078/LOC123145171/LOC123144698	10	8	123069738/123157680/123165990/123147636/123130649/123128078/123145171/123144698	2	123159888/123062884
BP	GO:0046907	intracellular transport	4/1675	309/19078	1	1	123069738/123157680/123165990/123147636	LOC123069738/LOC123157680/LOC123165990/LOC123147636	4	4	123069738/123157680/123165990/123147636	0
BP	GO:0051649	establishment of localization in cell	4/1675	309/19078	1	1	123069738/123157680/123165990/123147636	LOC123069738/LOC123157680/LOC123165990/LOC123147636	4	4	123069738/123157680/123165990/123147636	0
BP	GO:0008104	protein localization	7/1675	391/19078	1	1	123069738/123157680/123165990/123147636/123062884/123128078/123145171	LOC123069738/LOC123157680/LOC123165990/LOC123147636/LOC123062884/LOC123128078/LOC123145171	7	6	123069738/123157680/123165990/123147636/123128078/123145171	1	123062884
BP	GO:0016192	vesicle-mediated transport	7/1675	398/19078	1	1	123069738/123069452/123151634/123091476/123164187/123052518/123191107	LOC123069738/LOC123069452/LOC123151634/LOC123091476/LOC123164187/LOC123052518/LOC123191107	7	6	123069738/123069452/123151634/123091476/123052518/123191107	1	123164187
BP	GO:0071702	organic substance transport	10/1675	477/19078	1	1	543388/123069738/123157680/123165990/123163773/123147636/123150021/123062884/123128078/123145171	LOC543388/LOC123069738/LOC123157680/LOC123165990/LOC123163773/LOC123147636/LOC123150021/LOC123062884/LOC123128078/LOC123145171	10	7	543388/123069738/123157680/123165990/123147636/123128078/123145171	3	123163773/123150021/123062884
BP	GO:0051641	cellular localization	4/1675	358/19078	1	1	123069738/123157680/123165990/123147636	LOC123069738/LOC123157680/LOC123165990/LOC123147636	4	4	123069738/123157680/123165990/123147636	0
BP	GO:0033036	macromolecule localization	7/1675	434/19078	1	1	123069738/123157680/123165990/123147636/123062884/123128078/123145171	LOC123069738/LOC123157680/LOC123165990/LOC123147636/LOC123062884/LOC123128078/LOC123145171	7	6	123069738/123157680/123165990/123147636/123128078/123145171	1	123062884
BP	GO:0006396	RNA processing	3/1675	436/19078	1	1	123151266/123160920/123165686	LOC123151266/LOC123160920/LOC123165686	3	3	123151266/123160920/123165686	0
CC	GO:0005576	extracellular region	22/485	116/6736	2.12311e-05	0.00154987	123191268/123145161/123148738/123147783/123168533/123168995/123064457/123164298/123073752/123158976/123164299/123098684/123153374/123162241/123099138/123128811/606356/123073750/123059970/123158862/123167634/123130985	LOC123191268/LOC123145161/LOC123148738/LOC123147783/LOC123168533/LOC123168995/LOC123064457/LOC123164298/LOC123073752/LOC123158976/LOC123164299/LOC123098684/LOC123153374/LOC123162241/LOC123099138/LOC123128811/LOC606356/LOC123073750/LOC123059970/LOC123158862/LOC123167634/LOC123130985	22	16	123145161/123148738/123147783/123168533/123168995/123064457/123164298/123158976/123164299/123153374/123162241/123099138/606356/123073750/123158862/123167634	6	123191268/123073752/123098684/123128811/123059970/123130985
CC	GO:0005618	cell wall	13/485	73/6736	0.00188259	0.0343572	123145161/123148738/123147783/123168533/123168995/123164298/123158976/123164299/123153374/123162241/606356/123158862/123167634	LOC123145161/LOC123148738/LOC123147783/LOC123168533/LOC123168995/LOC123164298/LOC123158976/LOC123164299/LOC123153374/LOC123162241/LOC606356/LOC123158862/LOC123167634	13	13	123145161/123148738/123147783/123168533/123168995/123164298/123158976/123164299/123153374/123162241/606356/123158862/123167634	0
CC	GO:0030312	external encapsulating structure	13/485	73/6736	0.00188259	0.0343572	123145161/123148738/123147783/123168533/123168995/123164298/123158976/123164299/123153374/123162241/606356/123158862/123167634	LOC123145161/LOC123148738/LOC123147783/LOC123168533/LOC123168995/LOC123164298/LOC123158976/LOC123164299/LOC123153374/LOC123162241/LOC606356/LOC123158862/LOC123167634	13	13	123145161/123148738/123147783/123168533/123168995/123164298/123158976/123164299/123153374/123162241/606356/123158862/123167634	0
CC	GO:0048046	apoplast	13/485	73/6736	0.00188259	0.0343572	123145161/123148738/123147783/123168533/123168995/123164298/123158976/123164299/123153374/123162241/606356/123158862/123167634	LOC123145161/LOC123148738/LOC123147783/LOC123168533/LOC123168995/LOC123164298/LOC123158976/LOC123164299/LOC123153374/LOC123162241/LOC606356/LOC123158862/LOC123167634	13	13	123145161/123148738/123147783/123168533/123168995/123164298/123158976/123164299/123153374/123162241/606356/123158862/123167634	0
CC	GO:0031012	extracellular matrix	3/485	14/6736	0.0744984	0.776912	123099138/123128811/123130985	LOC123099138/LOC123128811/LOC123130985	3	1	123099138	2	123128811/123130985
CC	GO:0044421	extracellular region part	3/485	14/6736	0.0744984	0.776912	123099138/123128811/123130985	LOC123099138/LOC123128811/LOC123130985	3	1	123099138	2	123128811/123130985
CC	GO:0009521	photosystem	12/485	124/6736	0.180626	1	123128885/123146030/123139414/novel.2336/123144890/123189863/123189252/123097283/novel.1502/novel.2337/123127700/novel.1303	LOC123128885/LOC123146030/LOC123139414/-/LOC123144890/LOC123189863/LOC123189252/LOC123097283/-/-/LOC123127700/-	12	3	123144890/123189863/123127700	9	123128885/123146030/123139414/novel.2336/123189252/123097283/novel.1502/novel.2337/novel.1303
CC	GO:0034357	photosynthetic membrane	12/485	127/6736	0.202244	1	123128885/123146030/123139414/novel.2336/123144890/123189863/123189252/123097283/novel.1502/novel.2337/123127700/novel.1303	LOC123128885/LOC123146030/LOC123139414/-/LOC123144890/LOC123189863/LOC123189252/LOC123097283/-/-/LOC123127700/-	12	3	123144890/123189863/123127700	9	123128885/123146030/123139414/novel.2336/123189252/123097283/novel.1502/novel.2337/novel.1303
CC	GO:0009579	thylakoid	12/485	130/6736	0.224949	1	123128885/123146030/123139414/novel.2336/123144890/123189863/123189252/123097283/novel.1502/novel.2337/123127700/novel.1303	LOC123128885/LOC123146030/LOC123139414/-/LOC123144890/LOC123189863/LOC123189252/LOC123097283/-/-/LOC123127700/-	12	3	123144890/123189863/123127700	9	123128885/123146030/123139414/novel.2336/123189252/123097283/novel.1502/novel.2337/novel.1303
CC	GO:0044436	thylakoid part	12/485	130/6736	0.224949	1	123128885/123146030/123139414/novel.2336/123144890/123189863/123189252/123097283/novel.1502/novel.2337/123127700/novel.1303	LOC123128885/LOC123146030/LOC123139414/-/LOC123144890/LOC123189863/LOC123189252/LOC123097283/-/-/LOC123127700/-	12	3	123144890/123189863/123127700	9	123128885/123146030/123139414/novel.2336/123189252/123097283/novel.1502/novel.2337/novel.1303
CC	GO:0009654	photosystem II oxygen evolving complex	7/485	69/6736	0.226546	1	123128885/123146030/123139414/123144890/123189863/123189252/123127700	LOC123128885/LOC123146030/LOC123139414/LOC123144890/LOC123189863/LOC123189252/LOC123127700	7	3	123144890/123189863/123127700	4	123128885/123146030/123139414/123189252
CC	GO:0042651	thylakoid membrane	7/485	72/6736	0.259687	1	123128885/123146030/123139414/123144890/123189863/123189252/123127700	LOC123128885/LOC123146030/LOC123139414/LOC123144890/LOC123189863/LOC123189252/LOC123127700	7	3	123144890/123189863/123127700	4	123128885/123146030/123139414/123189252
CC	GO:1990204	oxidoreductase complex	7/485	76/6736	0.305803	1	123128885/123146030/123139414/123144890/123189863/123189252/123127700	LOC123128885/LOC123146030/LOC123139414/LOC123144890/LOC123189863/LOC123189252/LOC123127700	7	3	123144890/123189863/123127700	4	123128885/123146030/123139414/123189252
CC	GO:0009523	photosystem II	7/485	84/6736	0.401616	1	123128885/123146030/123139414/123144890/123189863/123189252/123127700	LOC123128885/LOC123146030/LOC123139414/LOC123144890/LOC123189863/LOC123189252/LOC123127700	7	3	123144890/123189863/123127700	4	123128885/123146030/123139414/123189252
CC	GO:0019898	extrinsic component of membrane	4/485	52/6736	0.521327	1	123144890/123189863/123189252/123127700	LOC123144890/LOC123189863/LOC123189252/LOC123127700	4	3	123144890/123189863/123127700	1	123189252
CC	GO:0071944	cell periphery	17/485	235/6736	0.529426	1	123145161/123148738/123151634/123147783/123168533/123168995/123091476/123164298/123158976/123164299/123153374/123162241/606356/123164187/123191107/123158862/123167634	LOC123145161/LOC123148738/LOC123151634/LOC123147783/LOC123168533/LOC123168995/LOC123091476/LOC123164298/LOC123158976/LOC123164299/LOC123153374/LOC123162241/LOC606356/LOC123164187/LOC123191107/LOC123158862/LOC123167634	17	16	123145161/123148738/123151634/123147783/123168533/123168995/123091476/123164298/123158976/123164299/123153374/123162241/606356/123191107/123158862/123167634	1	123164187
CC	GO:0030126	COPI vesicle coat	1/485	18/6736	0.739932	1	123069738	LOC123069738	1	1	123069738	0
CC	GO:0030137	COPI-coated vesicle	1/485	18/6736	0.739932	1	123069738	LOC123069738	1	1	123069738	0
CC	GO:0030663	COPI-coated vesicle membrane	1/485	18/6736	0.739932	1	123069738	LOC123069738	1	1	123069738	0
CC	GO:0009507	chloroplast	1/485	24/6736	0.834135	1	123156910	LOC123156910	1	0		1	123156910
CC	GO:0009536	plastid	1/485	24/6736	0.834135	1	123156910	LOC123156910	1	0		1	123156910
CC	GO:0005759	mitochondrial matrix	1/485	30/6736	0.89426	1	123077046	LOC123077046	1	0		1	123077046
CC	GO:0005741	mitochondrial outer membrane	1/485	34/6736	0.921694	1	123070016	LOC123070016	1	1	123070016	0
CC	GO:0031968	organelle outer membrane	1/485	34/6736	0.921694	1	123070016	LOC123070016	1	1	123070016	0
CC	GO:0000145	exocyst	4/485	108/6736	0.95755	1	123151634/123091476/123164187/123191107	LOC123151634/LOC123091476/LOC123164187/LOC123191107	4	3	123151634/123091476/123191107	1	123164187
CC	GO:0005938	cell cortex	4/485	108/6736	0.95755	1	123151634/123091476/123164187/123191107	LOC123151634/LOC123091476/LOC123164187/LOC123191107	4	3	123151634/123091476/123191107	1	123164187
CC	GO:0044448	cell cortex part	4/485	108/6736	0.95755	1	123151634/123091476/123164187/123191107	LOC123151634/LOC123091476/LOC123164187/LOC123191107	4	3	123151634/123091476/123191107	1	123164187
CC	GO:0099568	cytoplasmic region	4/485	108/6736	0.95755	1	123151634/123091476/123164187/123191107	LOC123151634/LOC123091476/LOC123164187/LOC123191107	4	3	123151634/123091476/123191107	1	123164187
CC	GO:0019867	outer membrane	1/485	52/6736	0.979779	1	123070016	LOC123070016	1	1	123070016	0
CC	GO:0099023	tethering complex	4/485	123/6736	0.980708	1	123151634/123091476/123164187/123191107	LOC123151634/LOC123091476/LOC123164187/LOC123191107	4	3	123151634/123091476/123191107	1	123164187
CC	GO:0005667	transcription factor complex	1/485	58/6736	0.987134	1	123065596	LOC123065596	1	1	123065596	0
CC	GO:0005798	Golgi-associated vesicle	1/485	58/6736	0.987134	1	123069738	LOC123069738	1	1	123069738	0
CC	GO:0012506	vesicle membrane	1/485	58/6736	0.987134	1	123069738	LOC123069738	1	1	123069738	0
CC	GO:0030120	vesicle coat	1/485	58/6736	0.987134	1	123069738	LOC123069738	1	1	123069738	0
CC	GO:0030135	coated vesicle	1/485	58/6736	0.987134	1	123069738	LOC123069738	1	1	123069738	0
CC	GO:0030659	cytoplasmic vesicle membrane	1/485	58/6736	0.987134	1	123069738	LOC123069738	1	1	123069738	0
CC	GO:0030660	Golgi-associated vesicle membrane	1/485	58/6736	0.987134	1	123069738	LOC123069738	1	1	123069738	0
CC	GO:0030662	coated vesicle membrane	1/485	58/6736	0.987134	1	123069738	LOC123069738	1	1	123069738	0
CC	GO:0005783	endoplasmic reticulum	3/485	118/6736	0.992704	1	123113502/100682434/123191861	LOC123113502/LOC100682434/LOC123191861	3	3	123113502/100682434/123191861	0
CC	GO:0031410	cytoplasmic vesicle	1/485	68/6736	0.99395	1	123069738	LOC123069738	1	1	123069738	0
CC	GO:0031982	vesicle	1/485	68/6736	0.99395	1	123069738	LOC123069738	1	1	123069738	0
CC	GO:0044433	cytoplasmic vesicle part	1/485	68/6736	0.99395	1	123069738	LOC123069738	1	1	123069738	0
CC	GO:0097708	intracellular vesicle	1/485	68/6736	0.99395	1	123069738	LOC123069738	1	1	123069738	0
CC	GO:0005794	Golgi apparatus	1/485	72/6736	0.995528	1	123069738	LOC123069738	1	1	123069738	0
CC	GO:0044431	Golgi apparatus part	1/485	72/6736	0.995528	1	123069738	LOC123069738	1	1	123069738	0
CC	GO:0005654	nucleoplasm	3/485	130/6736	0.996504	1	123151266/123160920/123165686	LOC123151266/LOC123160920/LOC123165686	3	3	123151266/123160920/123165686	0
CC	GO:0044451	nucleoplasm part	3/485	130/6736	0.996504	1	123151266/123160920/123165686	LOC123151266/LOC123160920/LOC123165686	3	3	123151266/123160920/123165686	0
CC	GO:0031966	mitochondrial membrane	1/485	85/6736	0.998327	1	123070016	LOC123070016	1	1	123070016	0
CC	GO:0030117	membrane coat	1/485	91/6736	0.998938	1	123069738	LOC123069738	1	1	123069738	0
CC	GO:0048475	coated membrane	1/485	91/6736	0.998938	1	123069738	LOC123069738	1	1	123069738	0
CC	GO:0098805	whole membrane	2/485	123/6736	0.998998	1	123069738/123070016	LOC123069738/LOC123070016	2	2	123069738/123070016	0
CC	GO:0044429	mitochondrial part	2/485	125/6736	0.999126	1	123070016/123077046	LOC123070016/LOC123077046	2	1	123070016	1	123077046
CC	GO:0005740	mitochondrial envelope	1/485	95/6736	0.999216	1	123070016	LOC123070016	1	1	123070016	0
CC	GO:0098796	membrane protein complex	13/485	390/6736	0.999726	1	123128885/123146030/123139414/123069738/novel.2336/123144890/123189863/123189252/123097283/novel.1502/novel.2337/123127700/novel.1303	LOC123128885/LOC123146030/LOC123139414/LOC123069738/-/LOC123144890/LOC123189863/LOC123189252/LOC123097283/-/-/LOC123127700/-	13	4	123069738/123144890/123189863/123127700	9	123128885/123146030/123139414/novel.2336/123189252/123097283/novel.1502/novel.2337/novel.1303
CC	GO:0031981	nuclear lumen	3/485	173/6736	0.999777	1	123151266/123160920/123165686	LOC123151266/LOC123160920/LOC123165686	3	3	123151266/123160920/123165686	0
CC	GO:0005739	mitochondrion	2/485	146/6736	0.999797	1	123070016/123077046	LOC123070016/LOC123077046	2	1	123070016	1	123077046
CC	GO:0031974	membrane-enclosed lumen	4/485	207/6736	0.999866	1	123151266/123160920/123165686/123077046	LOC123151266/LOC123160920/LOC123165686/LOC123077046	4	3	123151266/123160920/123165686	1	123077046
CC	GO:0043233	organelle lumen	4/485	207/6736	0.999866	1	123151266/123160920/123165686/123077046	LOC123151266/LOC123160920/LOC123165686/LOC123077046	4	3	123151266/123160920/123165686	1	123077046
CC	GO:0070013	intracellular organelle lumen	4/485	207/6736	0.999866	1	123151266/123160920/123165686/123077046	LOC123151266/LOC123160920/LOC123165686/LOC123077046	4	3	123151266/123160920/123165686	1	123077046
CC	GO:0098588	bounding membrane of organelle	2/485	152/6736	0.999866	1	123069738/123070016	LOC123069738/LOC123070016	2	2	123069738/123070016	0
CC	GO:0031967	organelle envelope	1/485	123/6736	0.999907	1	123070016	LOC123070016	1	1	123070016	0
CC	GO:0031975	envelope	1/485	123/6736	0.999907	1	123070016	LOC123070016	1	1	123070016	0
CC	GO:0000786	nucleosome	6/485	283/6736	0.999974	1	123083199/123142757/123181438/123190010/123062714/123182056	LOC123083199/LOC123142757/LOC123181438/LOC123190010/LOC123062714/LOC123182056	6	6	123083199/123142757/123181438/123190010/123062714/123182056	0
CC	GO:0032993	protein-DNA complex	6/485	286/6736	0.999978	1	123083199/123142757/123181438/123190010/123062714/123182056	LOC123083199/LOC123142757/LOC123181438/LOC123190010/LOC123062714/LOC123182056	6	6	123083199/123142757/123181438/123190010/123062714/123182056	0
CC	GO:0000785	chromatin	6/485	289/6736	0.999982	1	123083199/123142757/123181438/123190010/123062714/123182056	LOC123083199/LOC123142757/LOC123181438/LOC123190010/LOC123062714/LOC123182056	6	6	123083199/123142757/123181438/123190010/123062714/123182056	0
CC	GO:0044815	DNA packaging complex	6/485	289/6736	0.999982	1	123083199/123142757/123181438/123190010/123062714/123182056	LOC123083199/LOC123142757/LOC123181438/LOC123190010/LOC123062714/LOC123182056	6	6	123083199/123142757/123181438/123190010/123062714/123182056	0
CC	GO:0012505	endomembrane system	4/485	256/6736	0.999994	1	123069738/123113502/100682434/123191861	LOC123069738/LOC123113502/LOC100682434/LOC123191861	4	4	123069738/123113502/100682434/123191861	0
CC	GO:0031090	organelle membrane	2/485	203/6736	0.999996	1	123069738/123070016	LOC123069738/LOC123070016	2	2	123069738/123070016	0
CC	GO:0044428	nuclear part	3/485	252/6736	0.999999	1	123151266/123160920/123165686	LOC123151266/LOC123160920/LOC123165686	3	3	123151266/123160920/123165686	0
CC	GO:0044427	chromosomal part	6/485	347/6736	1	1	123083199/123142757/123181438/123190010/123062714/123182056	LOC123083199/LOC123142757/LOC123181438/LOC123190010/LOC123062714/LOC123182056	6	6	123083199/123142757/123181438/123190010/123062714/123182056	0
CC	GO:1902494	catalytic complex	7/485	378/6736	1	1	123128885/123146030/123139414/123144890/123189863/123189252/123127700	LOC123128885/LOC123146030/LOC123139414/LOC123144890/LOC123189863/LOC123189252/LOC123127700	7	3	123144890/123189863/123127700	4	123128885/123146030/123139414/123189252
CC	GO:0005694	chromosome	7/485	385/6736	1	1	123083199/123142757/123181438/123190010/123122365/123062714/123182056	LOC123083199/LOC123142757/LOC123181438/LOC123190010/LOC123122365/LOC123062714/LOC123182056	7	6	123083199/123142757/123181438/123190010/123062714/123182056	1	123122365
MF	GO:0033897	ribonuclease T2 activity	13/2465	22/32232	7.65369e-10	2.54868e-07	123121102/542947/123181837/123090606/543132/123117142/123181023/123044111/123185356/123167492/123051992/123131101/123041280	LOC123121102/LOC542947/LOC123181837/LOC123090606/LOC543132/LOC123117142/LOC123181023/LOC123044111/LOC123185356/LOC123167492/LOC123051992/LOC123131101/LOC123041280	13	11	123121102/542947/123181837/123090606/543132/123117142/123181023/123044111/123167492/123051992/123131101	2	123185356/123041280
MF	GO:0016892	endoribonuclease activity, producing 3'-phosphomonoesters	13/2465	27/32232	2.14282e-08	2.37853e-06	123121102/542947/123181837/123090606/543132/123117142/123181023/123044111/123185356/123167492/123051992/123131101/123041280	LOC123121102/LOC542947/LOC123181837/LOC123090606/LOC543132/LOC123117142/LOC123181023/LOC123044111/LOC123185356/LOC123167492/LOC123051992/LOC123131101/LOC123041280	13	11	123121102/542947/123181837/123090606/543132/123117142/123181023/123044111/123167492/123051992/123131101	2	123185356/123041280
MF	GO:0016894	endonuclease activity, active with either ribo- or deoxyribonucleic acids and producing 3'-phosphomonoesters	13/2465	27/32232	2.14282e-08	2.37853e-06	123121102/542947/123181837/123090606/543132/123117142/123181023/123044111/123185356/123167492/123051992/123131101/123041280	LOC123121102/LOC542947/LOC123181837/LOC123090606/LOC543132/LOC123117142/LOC123181023/LOC123044111/LOC123185356/LOC123167492/LOC123051992/LOC123131101/LOC123041280	13	11	123121102/542947/123181837/123090606/543132/123117142/123181023/123044111/123167492/123051992/123131101	2	123185356/123041280
MF	GO:0016702	oxidoreductase activity, acting on single donors with incorporation of molecular oxygen, incorporation of two atoms of oxygen	20/2465	80/32232	1.75048e-06	9.91614e-05	123095798/123142935/123090789/123095797/123122756/123119305/123047197/123132353/123136741/123119080/123136398/100682480/123101959/100313966/123090791/123110078/123104904/123113194/123088644/123132351	LOC123095798/LOC123142935/LOC123090789/LOC123095797/LOC123122756/LOC123119305/LOC123047197/LOC123132353/LOC123136741/LOC123119080/LOC123136398/LOC100682480/LOC123101959/LOC100313966/LOC123090791/LOC123110078/LOC123104904/LOC123113194/LOC123088644/LOC123132351	20	20	123095798/123142935/123090789/123095797/123122756/123119305/123047197/123132353/123136741/123119080/123136398/100682480/123101959/100313966/123090791/123110078/123104904/123113194/123088644/123132351	0
MF	GO:0051213	dioxygenase activity	20/2465	80/32232	1.75048e-06	9.91614e-05	123095798/123142935/123090789/123095797/123122756/123119305/123047197/123132353/123136741/123119080/123136398/100682480/123101959/100313966/123090791/123110078/123104904/123113194/123088644/123132351	LOC123095798/LOC123142935/LOC123090789/LOC123095797/LOC123122756/LOC123119305/LOC123047197/LOC123132353/LOC123136741/LOC123119080/LOC123136398/LOC100682480/LOC123101959/LOC100313966/LOC123090791/LOC123110078/LOC123104904/LOC123113194/LOC123088644/LOC123132351	20	20	123095798/123142935/123090789/123095797/123122756/123119305/123047197/123132353/123136741/123119080/123136398/100682480/123101959/100313966/123090791/123110078/123104904/123113194/123088644/123132351	0
MF	GO:0015238	drug transmembrane transporter activity	32/2465	170/32232	1.78669e-06	9.91614e-05	123072603/123079278/123045265/123044677/123103118/123072609/123128714/123182400/123150467/123067098/123097997/123137373/123120422/123093441/123182987/123091631/123167888/123160445/123094431/123165308/123098718/123072607/123150698/123054133/123162359/123086916/123087468/123157508/123112858/123051820/123190025/123157860	LOC123072603/LOC123079278/LOC123045265/LOC123044677/LOC123103118/LOC123072609/LOC123128714/LOC123182400/LOC123150467/LOC123067098/LOC123097997/LOC123137373/LOC123120422/LOC123093441/LOC123182987/LOC123091631/LOC123167888/LOC123160445/LOC123094431/LOC123165308/LOC123098718/LOC123072607/LOC123150698/LOC123054133/LOC123162359/LOC123086916/LOC123087468/LOC123157508/LOC123112858/LOC123051820/LOC123190…	32	27	123072603/123045265/123044677/123103118/123072609/123128714/123182400/123150467/123067098/123097997/123137373/123120422/123093441/123182987/123091631/123160445/123094431/123165308/123098718/123072607/123150698/123054133/123086916/123157508/123112858/123190025/123157860	5	123079278/123167888/123162359/123087468/123051820
MF	GO:0016747	transferase activity, transferring acyl groups other than amino-acyl groups	65/2465	477/32232	4.2166e-06	0.000107678	123180032/123051108/123105435/123080180/123098400/123045781/123071865/100125732/123065590/123060406/123107596/123189553/123150954/123086141/123149942/123152197/123094390/123068299/123170303/123139638/123068954/123099312/123140708/123053669/123162355/123057498/123189551/123115158/123058044/123166697/123062985/123166323/123143045/123093127/123099511/123065069/123039821/123127802/123125311/123137447…	LOC123180032/LOC123051108/LOC123105435/LOC123080180/LOC123098400/LOC123045781/LOC123071865/LOC100125732/LOC123065590/LOC123060406/LOC123107596/LOC123189553/LOC123150954/LOC123086141/LOC123149942/LOC123152197/LOC123094390/LOC123068299/LOC123170303/LOC123139638/LOC123068954/LOC123099312/LOC123140708/LOC123053669/LOC123162355/LOC123057498/LOC123189551/LOC123115158/LOC123058044/LOC123166697/LOC123062…	65	47	123051108/123045781/100125732/123065590/123060406/123107596/123086141/123149942/123152197/123094390/123170303/123139638/123068954/123099312/123053669/123189551/123115158/123058044/123166697/123166323/123099511/123065069/123039821/123127802/123125311/123137447/123146095/123063524/123180348/123182668/100270666/100125733/123085149/123190218/123044742/123166642/123112621/123082329/123107381/100136957…	18	123180032/123105435/123080180/123098400/123071865/123189553/123150954/123068299/123140708/123162355/123057498/123062985/123143045/123093127/123045784/123077536/123084953/123071866
MF	GO:0009916	alternative oxidase activity	8/2465	15/32232	4.56525e-06	0.000107678	123046562/123190292/123046561/123054419/123054420/100037522/123047283/123185979	LOC123046562/LOC123190292/LOC123046561/LOC123054419/LOC123054420/LOC100037522/LOC123047283/LOC123185979	8	8	123046562/123190292/123046561/123054419/123054420/100037522/123047283/123185979	0
MF	GO:0005244	voltage-gated ion channel activity	11/2465	29/32232	4.85037e-06	0.000107678	123070428/123113787/123078872/123053389/123045549/123105489/123143623/123123272/123189297/123136113/123132086	LOC123070428/LOC123113787/LOC123078872/LOC123053389/LOC123045549/LOC123105489/LOC123143623/LOC123123272/LOC123189297/LOC123136113/LOC123132086	11	3	123053389/123045549/123189297	8	123070428/123113787/123078872/123105489/123143623/123123272/123136113/123132086
MF	GO:0005247	voltage-gated chloride channel activity	11/2465	29/32232	4.85037e-06	0.000107678	123070428/123113787/123078872/123053389/123045549/123105489/123143623/123123272/123189297/123136113/123132086	LOC123070428/LOC123113787/LOC123078872/LOC123053389/LOC123045549/LOC123105489/LOC123143623/LOC123123272/LOC123189297/LOC123136113/LOC123132086	11	3	123053389/123045549/123189297	8	123070428/123113787/123078872/123105489/123143623/123123272/123136113/123132086
MF	GO:0005253	anion channel activity	11/2465	29/32232	4.85037e-06	0.000107678	123070428/123113787/123078872/123053389/123045549/123105489/123143623/123123272/123189297/123136113/123132086	LOC123070428/LOC123113787/LOC123078872/LOC123053389/LOC123045549/LOC123105489/LOC123143623/LOC123123272/LOC123189297/LOC123136113/LOC123132086	11	3	123053389/123045549/123189297	8	123070428/123113787/123078872/123105489/123143623/123123272/123136113/123132086
MF	GO:0005254	chloride channel activity	11/2465	29/32232	4.85037e-06	0.000107678	123070428/123113787/123078872/123053389/123045549/123105489/123143623/123123272/123189297/123136113/123132086	LOC123070428/LOC123113787/LOC123078872/LOC123053389/LOC123045549/LOC123105489/LOC123143623/LOC123123272/LOC123189297/LOC123136113/LOC123132086	11	3	123053389/123045549/123189297	8	123070428/123113787/123078872/123105489/123143623/123123272/123136113/123132086
MF	GO:0008308	voltage-gated anion channel activity	11/2465	29/32232	4.85037e-06	0.000107678	123070428/123113787/123078872/123053389/123045549/123105489/123143623/123123272/123189297/123136113/123132086	LOC123070428/LOC123113787/LOC123078872/LOC123053389/LOC123045549/LOC123105489/LOC123143623/LOC123123272/LOC123189297/LOC123136113/LOC123132086	11	3	123053389/123045549/123189297	8	123070428/123113787/123078872/123105489/123143623/123123272/123136113/123132086
MF	GO:0015108	chloride transmembrane transporter activity	11/2465	29/32232	4.85037e-06	0.000107678	123070428/123113787/123078872/123053389/123045549/123105489/123143623/123123272/123189297/123136113/123132086	LOC123070428/LOC123113787/LOC123078872/LOC123053389/LOC123045549/LOC123105489/LOC123143623/LOC123123272/LOC123189297/LOC123136113/LOC123132086	11	3	123053389/123045549/123189297	8	123070428/123113787/123078872/123105489/123143623/123123272/123136113/123132086
MF	GO:0022832	voltage-gated channel activity	11/2465	29/32232	4.85037e-06	0.000107678	123070428/123113787/123078872/123053389/123045549/123105489/123143623/123123272/123189297/123136113/123132086	LOC123070428/LOC123113787/LOC123078872/LOC123053389/LOC123045549/LOC123105489/LOC123143623/LOC123123272/LOC123189297/LOC123136113/LOC123132086	11	3	123053389/123045549/123189297	8	123070428/123113787/123078872/123105489/123143623/123123272/123136113/123132086
MF	GO:0019842	vitamin binding	37/2465	224/32232	7.34877e-06	0.000152946	123181337/123100106/123058524/123092844/123180387/123046237/123072164/123084961/123111103/123098411/123085585/123048811/123156993/123165077/123075872/123081930/123062118/123190806/123092445/123109698/123124488/123099923/543237/123051558/123091579/123084763/123094831/123147744/123112019/123080437/123097263/123189996/123085230/123057967/123060757/123074124/542824	LOC123181337/LOC123100106/LOC123058524/LOC123092844/LOC123180387/LOC123046237/LOC123072164/LOC123084961/LOC123111103/LOC123098411/LOC123085585/LOC123048811/LOC123156993/LOC123165077/LOC123075872/LOC123081930/LOC123062118/LOC123190806/LOC123092445/LOC123109698/LOC123124488/LOC123099923/LOC543237/LOC123051558/LOC123091579/LOC123084763/LOC123094831/LOC123147744/LOC123112019/LOC123080437/LOC123097263…	37	35	123181337/123100106/123092844/123180387/123046237/123072164/123084961/123111103/123098411/123085585/123048811/123156993/123165077/123075872/123081930/123062118/123190806/123092445/123109698/123124488/123099923/543237/123091579/123084763/123094831/123147744/123112019/123080437/123097263/123189996/123085230/123057967/123060757/123074124/542824	2	123058524/123051558
MF	GO:0016701	oxidoreductase activity, acting on single donors with incorporation of molecular oxygen	22/2465	103/32232	8.88145e-06	0.000173972	123095798/123142935/123090789/123095797/123122756/123119305/123047197/123132353/123063545/123136741/123119080/123136398/100682480/123101959/100313966/123090791/123110078/123168310/123104904/123113194/123088644/123132351	LOC123095798/LOC123142935/LOC123090789/LOC123095797/LOC123122756/LOC123119305/LOC123047197/LOC123132353/LOC123063545/LOC123136741/LOC123119080/LOC123136398/LOC100682480/LOC123101959/LOC100313966/LOC123090791/LOC123110078/LOC123168310/LOC123104904/LOC123113194/LOC123088644/LOC123132351	22	21	123095798/123142935/123090789/123095797/123122756/123119305/123047197/123132353/123136741/123119080/123136398/100682480/123101959/100313966/123090791/123110078/123168310/123104904/123113194/123088644/123132351	1	123063545
MF	GO:0015103	inorganic anion transmembrane transporter activity	18/2465	75/32232	1.05208e-05	0.000194634	123079164/123070428/123113787/123078872/123053389/123045549/123105489/123098407/123143623/123123272/123048932/123070775/123150081/123189297/123136113/123132086/100136990/123063357	LOC123079164/LOC123070428/LOC123113787/LOC123078872/LOC123053389/LOC123045549/LOC123105489/LOC123098407/LOC123143623/LOC123123272/LOC123048932/LOC123070775/LOC123150081/LOC123189297/LOC123136113/LOC123132086/LOC100136990/LOC123063357	18	9	123079164/123053389/123045549/123098407/123048932/123070775/123150081/123189297/100136990	9	123070428/123113787/123078872/123105489/123143623/123123272/123136113/123132086/123063357
MF	GO:0022804	active transmembrane transporter activity	54/2465	397/32232	2.76657e-05	0.000478409	123072603/123079278/123045265/123044677/123103118/123072609/123128714/123190826/123182400/123150467/123067098/123097997/123137373/123120422/123093441/123182987/123091631/123061790/123167888/123046664/123160445/101290581/123190378/123094431/123051199/123165308/123158100/123098718/123072607/543450/123062023/123060539/123148002/123150698/123054133/123170290/123162359/123169633/123086916/123164763/12…	LOC123072603/LOC123079278/LOC123045265/LOC123044677/LOC123103118/LOC123072609/LOC123128714/LOC123190826/LOC123182400/LOC123150467/LOC123067098/LOC123097997/LOC123137373/LOC123120422/LOC123093441/LOC123182987/LOC123091631/LOC123061790/LOC123167888/LOC123046664/LOC123160445/LOC101290581/LOC123190378/LOC123094431/LOC123051199/LOC123165308/LOC123158100/LOC123098718/LOC123072607/LOC543450/LOC123062023…	54	45	123072603/123045265/123044677/123103118/123072609/123128714/123182400/123150467/123067098/123097997/123137373/123120422/123093441/123182987/123091631/123061790/123046664/123160445/101290581/123190378/123094431/123051199/123165308/123158100/123098718/123072607/543450/123148002/123150698/123054133/123170290/123169633/123086916/123164763/543354/100127077/123054530/123150178/123157508/123093748/12316…	9	123079278/123190826/123167888/123062023/123060539/123162359/123148233/123087468/123051820
MF	GO:0016407	acetyltransferase activity	12/2465	40/32232	2.87333e-05	0.000478409	123080180/123098400/123045781/123071865/123189553/123053669/123189551/123062985/123093127/123045784/123084953/123071866	LOC123080180/LOC123098400/LOC123045781/LOC123071865/LOC123189553/LOC123053669/LOC123189551/LOC123062985/LOC123093127/LOC123045784/LOC123084953/LOC123071866	12	3	123045781/123053669/123189551	9	123080180/123098400/123071865/123189553/123062985/123093127/123045784/123084953/123071866
MF	GO:0043565	sequence-specific DNA binding	58/2465	442/32232	4.06993e-05	0.000645375	123121634/123041724/100049032/123103519/123147811/123054058/123058536/123116229/123185787/123124586/123111350/123050221/123103520/123169398/123106867/123175144/123127866/123074721/123103963/100037599/123111735/123171144/123171165/100192147/123141582/123121632/123097130/123158972/123065631/123057950/123088092/123079611/123093444/123177860/123116228/123182803/123147334/123052401/123058352/100192158…	LOC123121634/LOC123041724/LOC100049032/LOC123103519/LOC123147811/LOC123054058/LOC123058536/LOC123116229/LOC123185787/LOC123124586/LOC123111350/LOC123050221/LOC123103520/LOC123169398/LOC123106867/LOC123175144/LOC123127866/LOC123074721/LOC123103963/LOC100037599/LOC123111735/LOC123171144/LOC123171165/LOC100192147/LOC123141582/LOC123121632/LOC123097130/LOC123158972/LOC123065631/LOC123057950/LOC123088…	58	55	123121634/123041724/100049032/123103519/123147811/123054058/123058536/123116229/123185787/123124586/123111350/123050221/123103520/123169398/123106867/123175144/123127866/123074721/123103963/100037599/123111735/123171144/123171165/100192147/123141582/123121632/123097130/123158972/123065631/123088092/123079611/123093444/123177860/123116228/123182803/123147334/123052401/123058352/100192158/123069090…	3	123057950/123040621/123083029
MF	GO:0008509	anion transmembrane transporter activity	18/2465	83/32232	4.56468e-05	0.000690926	123079164/123070428/123113787/123078872/123053389/123045549/123105489/123098407/123143623/123123272/123048932/123070775/123150081/123189297/123136113/123132086/100136990/123063357	LOC123079164/LOC123070428/LOC123113787/LOC123078872/LOC123053389/LOC123045549/LOC123105489/LOC123098407/LOC123143623/LOC123123272/LOC123048932/LOC123070775/LOC123150081/LOC123189297/LOC123136113/LOC123132086/LOC100136990/LOC123063357	18	9	123079164/123053389/123045549/123098407/123048932/123070775/123150081/123189297/100136990	9	123070428/123113787/123078872/123105489/123143623/123123272/123136113/123132086/123063357
MF	GO:0005544	calcium-dependent phospholipid binding	10/2465	30/32232	4.85459e-05	0.000692713	123128335/123145442/123159768/123165576/123072432/123080658/123150077/123053963/123138184/123053937	LOC123128335/LOC123145442/LOC123159768/LOC123165576/LOC123072432/LOC123080658/LOC123150077/LOC123053963/LOC123138184/LOC123053937	10	8	123128335/123145442/123159768/123165576/123150077/123053963/123138184/123053937	2	123072432/123080658
MF	GO:0030170	pyridoxal phosphate binding	31/2465	191/32232	5.48647e-05	0.000692713	123181337/123100106/123058524/123092844/123180387/123046237/123084961/123111103/123098411/123048811/123156993/123165077/123075872/123081930/123062118/123190806/123109698/123124488/123099923/543237/123091579/123084763/123094831/123147744/123112019/123097263/123189996/123085230/123057967/123074124/542824	LOC123181337/LOC123100106/LOC123058524/LOC123092844/LOC123180387/LOC123046237/LOC123084961/LOC123111103/LOC123098411/LOC123048811/LOC123156993/LOC123165077/LOC123075872/LOC123081930/LOC123062118/LOC123190806/LOC123109698/LOC123124488/LOC123099923/LOC543237/LOC123091579/LOC123084763/LOC123094831/LOC123147744/LOC123112019/LOC123097263/LOC123189996/LOC123085230/LOC123057967/LOC123074124/LOC542824	31	30	123181337/123100106/123092844/123180387/123046237/123084961/123111103/123098411/123048811/123156993/123165077/123075872/123081930/123062118/123190806/123109698/123124488/123099923/543237/123091579/123084763/123094831/123147744/123112019/123097263/123189996/123085230/123057967/123074124/542824	1	123058524
MF	GO:0070279	vitamin B6 binding	31/2465	191/32232	5.48647e-05	0.000692713	123181337/123100106/123058524/123092844/123180387/123046237/123084961/123111103/123098411/123048811/123156993/123165077/123075872/123081930/123062118/123190806/123109698/123124488/123099923/543237/123091579/123084763/123094831/123147744/123112019/123097263/123189996/123085230/123057967/123074124/542824	LOC123181337/LOC123100106/LOC123058524/LOC123092844/LOC123180387/LOC123046237/LOC123084961/LOC123111103/LOC123098411/LOC123048811/LOC123156993/LOC123165077/LOC123075872/LOC123081930/LOC123062118/LOC123190806/LOC123109698/LOC123124488/LOC123099923/LOC543237/LOC123091579/LOC123084763/LOC123094831/LOC123147744/LOC123112019/LOC123097263/LOC123189996/LOC123085230/LOC123057967/LOC123074124/LOC542824	31	30	123181337/123100106/123092844/123180387/123046237/123084961/123111103/123098411/123048811/123156993/123165077/123075872/123081930/123062118/123190806/123109698/123124488/123099923/543237/123091579/123084763/123094831/123147744/123112019/123097263/123189996/123085230/123057967/123074124/542824	1	123058524
MF	GO:0004402	histone acetyltransferase activity	9/2465	25/32232	5.82461e-05	0.000692713	123080180/123045781/123071865/123189553/123053669/123189551/123062985/123045784/123071866	LOC123080180/LOC123045781/LOC123071865/LOC123189553/LOC123053669/LOC123189551/LOC123062985/LOC123045784/LOC123071866	9	3	123045781/123053669/123189551	6	123080180/123071865/123189553/123062985/123045784/123071866
MF	GO:0034212	peptide N-acetyltransferase activity	9/2465	25/32232	5.82461e-05	0.000692713	123080180/123045781/123071865/123189553/123053669/123189551/123062985/123045784/123071866	LOC123080180/LOC123045781/LOC123071865/LOC123189553/LOC123053669/LOC123189551/LOC123062985/LOC123045784/LOC123071866	9	3	123045781/123053669/123189551	6	123080180/123071865/123189553/123062985/123045784/123071866
MF	GO:0061733	peptide-lysine-N-acetyltransferase activity	9/2465	25/32232	5.82461e-05	0.000692713	123080180/123045781/123071865/123189553/123053669/123189551/123062985/123045784/123071866	LOC123080180/LOC123045781/LOC123071865/LOC123189553/LOC123053669/LOC123189551/LOC123062985/LOC123045784/LOC123071866	9	3	123045781/123053669/123189551	6	123080180/123071865/123189553/123062985/123045784/123071866
MF	GO:0019139	cytokinin dehydrogenase activity	8/2465	20/32232	6.31103e-05	0.00072468	123181824/123165939/123130341/123149681/123046279/123158636/123079353/123062219	LOC123181824/LOC123165939/LOC123130341/LOC123149681/LOC123046279/LOC123158636/LOC123079353/LOC123062219	8	0		8	123181824/123165939/123130341/123149681/123046279/123158636/123079353/123062219
MF	GO:0015297	antiporter activity	33/2465	218/32232	0.000129541	0.00143791	123072603/123079278/123045265/123044677/123103118/123072609/123128714/123182400/123150467/123067098/123097997/123137373/123120422/123093441/123182987/123091631/123167888/123160445/123094431/123165308/123098718/123072607/123150698/123054133/123162359/123086916/123087468/100127077/123157508/123112858/123051820/123190025/123157860	LOC123072603/LOC123079278/LOC123045265/LOC123044677/LOC123103118/LOC123072609/LOC123128714/LOC123182400/LOC123150467/LOC123067098/LOC123097997/LOC123137373/LOC123120422/LOC123093441/LOC123182987/LOC123091631/LOC123167888/LOC123160445/LOC123094431/LOC123165308/LOC123098718/LOC123072607/LOC123150698/LOC123054133/LOC123162359/LOC123086916/LOC123087468/LOC100127077/LOC123157508/LOC123112858/LOC123051…	33	28	123072603/123045265/123044677/123103118/123072609/123128714/123182400/123150467/123067098/123097997/123137373/123120422/123093441/123182987/123091631/123160445/123094431/123165308/123098718/123072607/123150698/123054133/123086916/100127077/123157508/123112858/123190025/123157860	5	123079278/123167888/123162359/123087468/123051820
MF	GO:0008080	N-acetyltransferase activity	9/2465	28/32232	0.000159581	0.00161122	123080180/123045781/123071865/123189553/123053669/123189551/123062985/123045784/123071866	LOC123080180/LOC123045781/LOC123071865/LOC123189553/LOC123053669/LOC123189551/LOC123062985/LOC123045784/LOC123071866	9	3	123045781/123053669/123189551	6	123080180/123071865/123189553/123062985/123045784/123071866
MF	GO:0016682	oxidoreductase activity, acting on diphenols and related substances as donors, oxygen as acceptor	9/2465	28/32232	0.000159581	0.00161122	123046562/123190292/123046561/123054419/123054420/100037522/123047283/123055490/123185979	LOC123046562/LOC123190292/LOC123046561/LOC123054419/LOC123054420/LOC100037522/LOC123047283/LOC123055490/LOC123185979	9	9	123046562/123190292/123046561/123054419/123054420/100037522/123047283/123055490/123185979	0
MF	GO:0016717	oxidoreductase activity, acting on paired donors, with oxidation of a pair of donors resulting in the reduction of molecular oxygen to two molecules of water	10/2465	34/32232	0.000159671	0.00161122	123168642/123120533/123102951/123045284/123092458/123085571/123111108/123086342/123097784/123161912	LOC123168642/LOC123120533/LOC123102951/LOC123045284/LOC123092458/LOC123085571/LOC123111108/LOC123086342/LOC123097784/LOC123161912	10	7	123168642/123045284/123092458/123085571/123086342/123097784/123161912	3	123120533/123102951/123111108
MF	GO:0015291	secondary active transmembrane transporter activity	33/2465	221/32232	0.000168473	0.00165005	123072603/123079278/123045265/123044677/123103118/123072609/123128714/123182400/123150467/123067098/123097997/123137373/123120422/123093441/123182987/123091631/123167888/123160445/123094431/123165308/123098718/123072607/123150698/123054133/123162359/123086916/123087468/100127077/123157508/123112858/123051820/123190025/123157860	LOC123072603/LOC123079278/LOC123045265/LOC123044677/LOC123103118/LOC123072609/LOC123128714/LOC123182400/LOC123150467/LOC123067098/LOC123097997/LOC123137373/LOC123120422/LOC123093441/LOC123182987/LOC123091631/LOC123167888/LOC123160445/LOC123094431/LOC123165308/LOC123098718/LOC123072607/LOC123150698/LOC123054133/LOC123162359/LOC123086916/LOC123087468/LOC100127077/LOC123157508/LOC123112858/LOC123051…	33	28	123072603/123045265/123044677/123103118/123072609/123128714/123182400/123150467/123067098/123097997/123137373/123120422/123093441/123182987/123091631/123160445/123094431/123165308/123098718/123072607/123150698/123054133/123086916/100127077/123157508/123112858/123190025/123157860	5	123079278/123167888/123162359/123087468/123051820
MF	GO:0016160	amylase activity	11/2465	41/32232	0.000188078	0.00178942	123165490/123069423/123077920/123105923/123128167/123093753/123181646/123052101/123138358/123098985/123164937	LOC123165490/LOC123069423/LOC123077920/LOC123105923/LOC123128167/LOC123093753/LOC123181646/LOC123052101/LOC123138358/LOC123098985/LOC123164937	11	10	123165490/123069423/123077920/123105923/123128167/123093753/123181646/123052101/123098985/123164937	1	123138358
MF	GO:0004601	peroxidase activity	44/2465	333/32232	0.000279008	0.00258082	123051568/123143229/123040643/123050885/543313/123112512/123151125/123055645/123078151/123160071/123072701/123043706/123061077/123157228/123130109/123069666/123186813/100192164/123167064/123078123/123154588/123189671/123052925/123078819/123180481/123097394/123128512/123080888/100136987/123182710/123184740/123167122/123043698/100192163/123151626/123088377/123143227/123053783/123050787/123160997/54…	LOC123051568/LOC123143229/LOC123040643/LOC123050885/LOC543313/LOC123112512/LOC123151125/LOC123055645/LOC123078151/LOC123160071/LOC123072701/LOC123043706/LOC123061077/LOC123157228/LOC123130109/LOC123069666/LOC123186813/LOC100192164/LOC123167064/LOC123078123/LOC123154588/LOC123189671/LOC123052925/LOC123078819/LOC123180481/LOC123097394/LOC123128512/LOC123080888/LOC100136987/LOC123182710/LOC123184740…	44	14	123078151/123061077/123157228/123069666/123078123/123189671/123180481/123097394/123128512/123182710/123053783/543151/123169185/123110643	30	123051568/123143229/123040643/123050885/543313/123112512/123151125/123055645/123160071/123072701/123043706/123130109/123186813/100192164/123167064/123154588/123052925/123078819/123080888/100136987/123184740/123167122/123043698/100192163/123151626/123088377/123143227/123050787/123160997/123041590
MF	GO:0005509	calcium ion binding	57/2465	466/32232	0.000309054	0.00278148	123128335/123145442/123076919/123169475/123159768/123043064/123107239/123165576/123142464/123165490/123180762/123041569/123072432/123049548/123104984/123080658/123108110/123148241/123124878/123185647/123068480/123190076/123139639/123071135/123121737/123150077/123124903/123068372/123131025/123144890/123116241/123062362/123053963/123107112/123080703/123189863/123138184/123053937/123189252/123143366…	LOC123128335/LOC123145442/LOC123076919/LOC123169475/LOC123159768/LOC123043064/LOC123107239/LOC123165576/LOC123142464/LOC123165490/LOC123180762/LOC123041569/LOC123072432/LOC123049548/LOC123104984/LOC123080658/LOC123108110/LOC123148241/LOC123124878/LOC123185647/LOC123068480/LOC123190076/LOC123139639/LOC123071135/LOC123121737/LOC123150077/LOC123124903/LOC123068372/LOC123131025/LOC123144890/LOC123116…	57	48	123128335/123145442/123076919/123169475/123159768/123043064/123107239/123165576/123142464/123165490/123180762/123041569/123049548/123104984/123108110/123148241/123124878/123185647/123068480/123190076/123071135/123150077/123068372/123131025/123144890/123116241/123062362/123053963/123107112/123080703/123189863/123138184/123053937/123143366/123092475/123141853/123122790/123073809/123168784/123142072…	9	123072432/123080658/123139639/123121737/123124903/123189252/123107155/123138358/123139458
MF	GO:0016624	oxidoreductase activity, acting on the aldehyde or oxo group of donors, disulfide as acceptor	7/2465	19/32232	0.000335742	0.00294216	123167622/100682406/123111084/123102909/123150992/123160228/123091068	LOC123167622/LOC100682406/LOC123111084/LOC123102909/LOC123150992/LOC123160228/LOC123091068	7	7	123167622/100682406/123111084/123102909/123150992/123160228/123091068	0
MF	GO:0046527	glucosyltransferase activity	30/2465	202/32232	0.000356864	0.00301502	123044580/123092190/123044576/123052082/123097521/123068318/123052445/123049142/123085854/123145161/123188320/123148738/123185146/123121827/542972/123147783/123076710/123044579/123168533/123168995/123164298/123158976/123164299/123153374/123162241/606356/123187938/123063086/123158862/123167634	LOC123044580/LOC123092190/LOC123044576/LOC123052082/LOC123097521/LOC123068318/LOC123052445/LOC123049142/LOC123085854/LOC123145161/LOC123188320/LOC123148738/LOC123185146/LOC123121827/LOC542972/LOC123147783/LOC123076710/LOC123044579/LOC123168533/LOC123168995/LOC123164298/LOC123158976/LOC123164299/LOC123153374/LOC123162241/LOC606356/LOC123187938/LOC123063086/LOC123158862/LOC123167634	30	27	123044580/123092190/123044576/123052082/123097521/123052445/123049142/123085854/123145161/123188320/123148738/123185146/542972/123147783/123044579/123168533/123168995/123164298/123158976/123164299/123153374/123162241/606356/123187938/123063086/123158862/123167634	3	123068318/123121827/123076710
MF	GO:0016684	oxidoreductase activity, acting on peroxide as acceptor	44/2465	337/32232	0.000362165	0.00301502	123051568/123143229/123040643/123050885/543313/123112512/123151125/123055645/123078151/123160071/123072701/123043706/123061077/123157228/123130109/123069666/123186813/100192164/123167064/123078123/123154588/123189671/123052925/123078819/123180481/123097394/123128512/123080888/100136987/123182710/123184740/123167122/123043698/100192163/123151626/123088377/123143227/123053783/123050787/123160997/54…	LOC123051568/LOC123143229/LOC123040643/LOC123050885/LOC543313/LOC123112512/LOC123151125/LOC123055645/LOC123078151/LOC123160071/LOC123072701/LOC123043706/LOC123061077/LOC123157228/LOC123130109/LOC123069666/LOC123186813/LOC100192164/LOC123167064/LOC123078123/LOC123154588/LOC123189671/LOC123052925/LOC123078819/LOC123180481/LOC123097394/LOC123128512/LOC123080888/LOC100136987/LOC123182710/LOC123184740…	44	14	123078151/123061077/123157228/123069666/123078123/123189671/123180481/123097394/123128512/123182710/123053783/543151/123169185/123110643	30	123051568/123143229/123040643/123050885/543313/123112512/123151125/123055645/123160071/123072701/123043706/123130109/123186813/100192164/123167064/123154588/123052925/123078819/123080888/100136987/123184740/123167122/123043698/100192163/123151626/123088377/123143227/123050787/123160997/123041590
MF	GO:0016410	N-acyltransferase activity	9/2465	31/32232	0.000377691	0.00306759	123080180/123045781/123071865/123189553/123053669/123189551/123062985/123045784/123071866	LOC123080180/LOC123045781/LOC123071865/LOC123189553/LOC123053669/LOC123189551/LOC123062985/LOC123045784/LOC123071866	9	3	123045781/123053669/123189551	6	123080180/123071865/123189553/123062985/123045784/123071866
MF	GO:0004611	phosphoenolpyruvate carboxykinase activity	7/2465	20/32232	0.000482543	0.00382588	123092719/123098016/123060630/123085323/123164058/123156484/123147894	LOC123092719/LOC123098016/LOC123060630/LOC123085323/LOC123164058/LOC123156484/LOC123147894	7	3	123092719/123098016/123085323	4	123060630/123164058/123156484/123147894
MF	GO:0016161	beta-amylase activity	8/2465	26/32232	0.000516823	0.00400237	123069423/123077920/123105923/123128167/123093753/123181646/123052101/123098985	LOC123069423/LOC123077920/LOC123105923/LOC123128167/LOC123093753/LOC123181646/LOC123052101/LOC123098985	8	8	123069423/123077920/123105923/123128167/123093753/123181646/123052101/123098985	0
MF	GO:0004478	methionine adenosyltransferase activity	5/2465	11/32232	0.000813321	0.00615536	123127933/123137700/123127932/123137699/123069861	LOC123127933/LOC123137700/LOC123127932/LOC123137699/LOC123069861	5	5	123127933/123137700/123127932/123137699/123069861	0
MF	GO:0008483	transaminase activity	8/2465	28/32232	0.000895912	0.00648562	123156993/123165077/123081930/123099923/123084763/123094831/123147744/542824	LOC123156993/LOC123165077/LOC123081930/LOC123099923/LOC123084763/LOC123094831/LOC123147744/LOC542824	8	8	123156993/123165077/123081930/123099923/123084763/123094831/123147744/542824	0
MF	GO:0016769	transferase activity, transferring nitrogenous groups	8/2465	28/32232	0.000895912	0.00648562	123156993/123165077/123081930/123099923/123084763/123094831/123147744/542824	LOC123156993/LOC123165077/LOC123081930/LOC123099923/LOC123084763/LOC123094831/LOC123147744/LOC542824	8	8	123156993/123165077/123081930/123099923/123084763/123094831/123147744/542824	0
MF	GO:0016209	antioxidant activity	44/2465	353/32232	0.00096065	0.0068063	123051568/123143229/123040643/123050885/543313/123112512/123151125/123055645/123078151/123160071/123072701/123043706/123061077/123157228/123130109/123069666/123186813/100192164/123167064/123078123/123154588/123189671/123052925/123078819/123180481/123097394/123128512/123080888/100136987/123182710/123184740/123167122/123043698/100192163/123151626/123088377/123143227/123053783/123050787/123160997/54…	LOC123051568/LOC123143229/LOC123040643/LOC123050885/LOC543313/LOC123112512/LOC123151125/LOC123055645/LOC123078151/LOC123160071/LOC123072701/LOC123043706/LOC123061077/LOC123157228/LOC123130109/LOC123069666/LOC123186813/LOC100192164/LOC123167064/LOC123078123/LOC123154588/LOC123189671/LOC123052925/LOC123078819/LOC123180481/LOC123097394/LOC123128512/LOC123080888/LOC100136987/LOC123182710/LOC123184740…	44	14	123078151/123061077/123157228/123069666/123078123/123189671/123180481/123097394/123128512/123182710/123053783/543151/123169185/123110643	30	123051568/123143229/123040643/123050885/543313/123112512/123151125/123055645/123160071/123072701/123043706/123130109/123186813/100192164/123167064/123154588/123052925/123078819/123080888/100136987/123184740/123167122/123043698/100192163/123151626/123088377/123143227/123050787/123160997/123041590
MF	GO:0016645	oxidoreductase activity, acting on the CH-NH group of donors	9/2465	35/32232	0.00100115	0.00694548	123113925/123181824/123165939/123130341/123149681/123046279/123158636/123079353/123062219	LOC123113925/LOC123181824/LOC123165939/LOC123130341/LOC123149681/LOC123046279/LOC123158636/LOC123079353/LOC123062219	9	1	123113925	8	123181824/123165939/123130341/123149681/123046279/123158636/123079353/123062219
MF	GO:0008171	O-methyltransferase activity	16/2465	91/32232	0.00138821	0.00943417	123182632/123096104/123080061/123172901/543449/123083371/123165759/123182629/123174003/123083478/123083351/123164941/123048639/123084737/123182631/123093353	LOC123182632/LOC123096104/LOC123080061/LOC123172901/LOC543449/LOC123083371/LOC123165759/LOC123182629/LOC123174003/LOC123083478/LOC123083351/LOC123164941/LOC123048639/LOC123084737/LOC123182631/LOC123093353	16	7	123080061/543449/123083371/123165759/123083478/123083351/123164941	9	123182632/123096104/123172901/123182629/123174003/123048639/123084737/123182631/123093353
MF	GO:0015267	channel activity	31/2465	230/32232	0.00149668	0.00977243	123070428/123113787/123078872/123146261/123053389/123045549/123129091/123105489/543268/100859943/123048490/123132598/123138237/123181293/123149652/123164565/123143623/123128380/123123272/123137377/123043385/123053974/123182526/123149807/123189297/123136113/123132086/123111686/123159285/123124972/123093790	LOC123070428/LOC123113787/LOC123078872/LOC123146261/LOC123053389/LOC123045549/LOC123129091/LOC123105489/LOC543268/LOC100859943/LOC123048490/LOC123132598/LOC123138237/LOC123181293/LOC123149652/LOC123164565/LOC123143623/LOC123128380/LOC123123272/LOC123137377/LOC123043385/LOC123053974/LOC123182526/LOC123149807/LOC123189297/LOC123136113/LOC123132086/LOC123111686/LOC123159285/LOC123124972/LOC123093790	31	10	123146261/123053389/123045549/123129091/123149652/123137377/123053974/123189297/123159285/123093790	21	123070428/123113787/123078872/123105489/543268/100859943/123048490/123132598/123138237/123181293/123164565/123143623/123128380/123123272/123043385/123182526/123149807/123136113/123132086/123111686/123124972
MF	GO:0022803	passive transmembrane transporter activity	31/2465	230/32232	0.00149668	0.00977243	123070428/123113787/123078872/123146261/123053389/123045549/123129091/123105489/543268/100859943/123048490/123132598/123138237/123181293/123149652/123164565/123143623/123128380/123123272/123137377/123043385/123053974/123182526/123149807/123189297/123136113/123132086/123111686/123159285/123124972/123093790	LOC123070428/LOC123113787/LOC123078872/LOC123146261/LOC123053389/LOC123045549/LOC123129091/LOC123105489/LOC543268/LOC100859943/LOC123048490/LOC123132598/LOC123138237/LOC123181293/LOC123149652/LOC123164565/LOC123143623/LOC123128380/LOC123123272/LOC123137377/LOC123043385/LOC123053974/LOC123182526/LOC123149807/LOC123189297/LOC123136113/LOC123132086/LOC123111686/LOC123159285/LOC123124972/LOC123093790	31	10	123146261/123053389/123045549/123129091/123149652/123137377/123053974/123189297/123159285/123093790	21	123070428/123113787/123078872/123105489/543268/100859943/123048490/123132598/123138237/123181293/123164565/123143623/123128380/123123272/123043385/123182526/123149807/123136113/123132086/123111686/123124972
MF	GO:0016829	lyase activity	46/2465	384/32232	0.0016992	0.0108814	123092719/123098016/123060630/123085323/123100106/123164058/123160552/123169615/123092844/123127312/123044226/123039823/123156484/123166700/123121464/123140984/123184860/123123214/123078640/123049559/123046120/123079989/123075872/123122848/123140979/123041365/123189133/123060273/123135858/123147894/123181559/123113335/123054000/123104876/123149505/123136954/123133533/123113163/123136200/123069406…	LOC123092719/LOC123098016/LOC123060630/LOC123085323/LOC123100106/LOC123164058/LOC123160552/LOC123169615/LOC123092844/LOC123127312/LOC123044226/LOC123039823/LOC123156484/LOC123166700/LOC123121464/LOC123140984/LOC123184860/LOC123123214/LOC123078640/LOC123049559/LOC123046120/LOC123079989/LOC123075872/LOC123122848/LOC123140979/LOC123041365/LOC123189133/LOC123060273/LOC123135858/LOC123147894/LOC123181…	46	31	123092719/123098016/123085323/123100106/123092844/123127312/123044226/123039823/123121464/123140984/123123214/123046120/123079989/123075872/123122848/123140979/123041365/123189133/123181559/123113335/123054000/123104876/123149505/123136954/123133533/123113163/123085230/123103686/123140983/123189889/123092316	15	123060630/123164058/123160552/123169615/123156484/123166700/123184860/123078640/123049559/123060273/123135858/123147894/123136200/123069406/123149009
MF	GO:0016679	oxidoreductase activity, acting on diphenols and related substances as donors	9/2465	39/32232	0.00227668	0.0143044	123046562/123190292/123046561/123054419/123054420/100037522/123047283/123055490/123185979	LOC123046562/LOC123190292/LOC123046561/LOC123054419/LOC123054420/LOC100037522/LOC123047283/LOC123055490/LOC123185979	9	9	123046562/123190292/123046561/123054419/123054420/100037522/123047283/123055490/123185979	0
MF	GO:0045300	acyl-[acyl-carrier-protein] desaturase activity	5/2465	14/32232	0.00290194	0.0178953	123168642/123102951/123045284/123111108/123161912	LOC123168642/LOC123102951/LOC123045284/LOC123111108/LOC123161912	5	3	123168642/123045284/123161912	2	123102951/123111108
MF	GO:0016762	xyloglucan:xyloglucosyl transferase activity	13/2465	73/32232	0.00334964	0.0202806	123145161/123148738/123147783/123168533/123168995/123164298/123158976/123164299/123153374/123162241/606356/123158862/123167634	LOC123145161/LOC123148738/LOC123147783/LOC123168533/LOC123168995/LOC123164298/LOC123158976/LOC123164299/LOC123153374/LOC123162241/LOC606356/LOC123158862/LOC123167634	13	13	123145161/123148738/123147783/123168533/123168995/123164298/123158976/123164299/123153374/123162241/606356/123158862/123167634	0
MF	GO:0016157	sucrose synthase activity	7/2465	29/32232	0.00528834	0.0314467	123092190/123052082/123097521/123085854/542972/123187938/123063086	LOC123092190/LOC123052082/LOC123097521/LOC123085854/LOC542972/LOC123187938/LOC123063086	7	7	123092190/123052082/123097521/123085854/542972/123187938/123063086	0
MF	GO:0004089	carbonate dehydratase activity	5/2465	17/32232	0.00739511	0.0431052	123160552/123169615/123166700/123078640/123149009	LOC123160552/LOC123169615/LOC123166700/LOC123078640/LOC123149009	5	0		5	123160552/123169615/123166700/123078640/123149009
MF	GO:0016835	carbon-oxygen lyase activity	21/2465	155/32232	0.00750782	0.0431052	123160552/123169615/123127312/123039823/123166700/123140984/123184860/123123214/123078640/123049559/123140979/123041365/123189133/123135858/123104876/123136954/123133533/123113163/123136200/123149009/123140983	LOC123160552/LOC123169615/LOC123127312/LOC123039823/LOC123166700/LOC123140984/LOC123184860/LOC123123214/LOC123078640/LOC123049559/LOC123140979/LOC123041365/LOC123189133/LOC123135858/LOC123104876/LOC123136954/LOC123133533/LOC123113163/LOC123136200/LOC123149009/LOC123140983	21	12	123127312/123039823/123140984/123123214/123140979/123041365/123189133/123104876/123136954/123133533/123113163/123140983	9	123160552/123169615/123166700/123184860/123078640/123049559/123135858/123136200/123149009
MF	GO:0005543	phospholipid binding	13/2465	81/32232	0.00826684	0.0466586	123128335/123145442/123159768/123165576/123072432/123080658/123082221/123096203/123150077/123053963/123138184/123053937/123187111	LOC123128335/LOC123145442/LOC123159768/LOC123165576/LOC123072432/LOC123080658/LOC123082221/LOC123096203/LOC123150077/LOC123053963/LOC123138184/LOC123053937/LOC123187111	13	9	123128335/123145442/123159768/123165576/123150077/123053963/123138184/123053937/123187111	4	123072432/123080658/123082221/123096203
MF	GO:0030151	molybdenum ion binding	5/2465	18/32232	0.00960417	0.0533031	123145655/123135422/123143006/123138401/123128536	LOC123145655/LOC123135422/LOC123143006/LOC123138401/LOC123128536	5	3	123145655/123138401/123128536	2	123135422/123143006
MF	GO:0050660	flavin adenine dinucleotide binding	30/2465	256/32232	0.0130897	0.0714567	123151651/123170534/123154502/123181824/123148124/123144856/123137502/123165939/123130341/123166970/123095594/123149681/123165594/123122507/123177647/123046279/123185486/123085101/123121890/123106963/123160531/123157487/123190424/123045454/123069860/123158636/123079353/123127745/123104717/123062219	LOC123151651/LOC123170534/LOC123154502/LOC123181824/LOC123148124/LOC123144856/LOC123137502/LOC123165939/LOC123130341/LOC123166970/LOC123095594/LOC123149681/LOC123165594/LOC123122507/LOC123177647/LOC123046279/LOC123185486/LOC123085101/LOC123121890/LOC123106963/LOC123160531/LOC123157487/LOC123190424/LOC123045454/LOC123069860/LOC123158636/LOC123079353/LOC123127745/LOC123104717/LOC123062219	30	19	123151651/123170534/123148124/123144856/123137502/123166970/123095594/123165594/123177647/123185486/123085101/123106963/123160531/123157487/123190424/123045454/123069860/123127745/123104717	11	123154502/123181824/123165939/123130341/123149681/123122507/123046279/123121890/123158636/123079353/123062219
MF	GO:0015079	potassium ion transmembrane transporter activity	10/2465	60/32232	0.0149542	0.0771784	123121414/123111848/123152478/123159986/123141760/123166399/123134486/123121696/123145391/123150115	LOC123121414/LOC123111848/LOC123152478/LOC123159986/LOC123141760/LOC123166399/LOC123134486/LOC123121696/LOC123145391/LOC123150115	10	9	123121414/123111848/123159986/123141760/123166399/123134486/123121696/123145391/123150115	1	123152478
MF	GO:0004564	beta-fructofuranosidase activity	5/2465	20/32232	0.0152966	0.0771784	123150153/123088588/123150152/542774/123088589	LOC123150153/LOC123088588/LOC123150152/LOC542774/LOC123088589	5	5	123150153/123088588/123150152/542774/123088589	0
MF	GO:0004575	sucrose alpha-glucosidase activity	5/2465	20/32232	0.0152966	0.0771784	123150153/123088588/123150152/542774/123088589	LOC123150153/LOC123088588/LOC123150152/LOC542774/LOC123088589	5	5	123150153/123088588/123150152/542774/123088589	0
MF	GO:0015926	glucosidase activity	5/2465	20/32232	0.0152966	0.0771784	123150153/123088588/123150152/542774/123088589	LOC123150153/LOC123088588/LOC123150152/LOC542774/LOC123088589	5	5	123150153/123088588/123150152/542774/123088589	0
MF	GO:0090599	alpha-glucosidase activity	5/2465	20/32232	0.0152966	0.0771784	123150153/123088588/123150152/542774/123088589	LOC123150153/LOC123088588/LOC123150152/LOC542774/LOC123088589	5	5	123150153/123088588/123150152/542774/123088589	0
MF	GO:0035251	UDP-glucosyltransferase activity	17/2465	128/32232	0.0180803	0.0885019	123044580/123092190/123044576/123052082/123097521/123068318/123052445/123049142/123085854/123188320/123185146/123121827/542972/123076710/123044579/123187938/123063086	LOC123044580/LOC123092190/LOC123044576/LOC123052082/LOC123097521/LOC123068318/LOC123052445/LOC123049142/LOC123085854/LOC123188320/LOC123185146/LOC123121827/LOC542972/LOC123076710/LOC123044579/LOC123187938/LOC123063086	17	14	123044580/123092190/123044576/123052082/123097521/123052445/123049142/123085854/123188320/123185146/542972/123044579/123187938/123063086	3	123068318/123121827/123076710
MF	GO:0008964	phosphoenolpyruvate carboxylase activity	4/2465	14/32232	0.0183382	0.0885019	123060630/123164058/123156484/123147894	LOC123060630/LOC123164058/LOC123156484/LOC123147894	4	0		4	123060630/123164058/123156484/123147894
MF	GO:0046556	alpha-L-arabinofuranosidase activity	4/2465	14/32232	0.0183382	0.0885019	123091621/123097626/123111290/123085717	LOC123091621/LOC123097626/LOC123111290/LOC123085717	4	0		4	123091621/123097626/123111290/123085717
MF	GO:0004664	prephenate dehydratase activity	5/2465	21/32232	0.0188401	0.0896248	123049559/123041365/123189133/123104876/123113163	LOC123049559/LOC123041365/LOC123189133/LOC123104876/LOC123113163	5	4	123041365/123189133/123104876/123113163	1	123049559
MF	GO:0045735	nutrient reservoir activity	15/2465	110/32232	0.0203969	0.0956644	543339/123113028/123095769/123184745/123107670/123187274/123085798/123051322/123161916/542989/123100701/123043461/123115655/123092206/123125400	LOC543339/LOC123113028/LOC123095769/LOC123184745/LOC123107670/LOC123187274/LOC123085798/LOC123051322/LOC123161916/LOC542989/LOC123100701/LOC123043461/LOC123115655/LOC123092206/LOC123125400	15	7	543339/123113028/123107670/123085798/123115655/123092206/123125400	8	123095769/123184745/123187274/123051322/123161916/542989/123100701/123043461
MF	GO:0004866	endopeptidase inhibitor activity	8/2465	47/32232	0.0249192	0.110641	123078150/123064457/123073752/123098684/123041664/542782/123073750/123059970	LOC123078150/LOC123064457/LOC123073752/LOC123098684/LOC123041664/LOC542782/LOC123073750/LOC123059970	8	4	123078150/123064457/542782/123073750	4	123073752/123098684/123041664/123059970
MF	GO:0030414	peptidase inhibitor activity	8/2465	47/32232	0.0249192	0.110641	123078150/123064457/123073752/123098684/123041664/542782/123073750/123059970	LOC123078150/LOC123064457/LOC123073752/LOC123098684/LOC123041664/LOC542782/LOC123073750/LOC123059970	8	4	123078150/123064457/542782/123073750	4	123073752/123098684/123041664/123059970
MF	GO:0061134	peptidase regulator activity	8/2465	47/32232	0.0249192	0.110641	123078150/123064457/123073752/123098684/123041664/542782/123073750/123059970	LOC123078150/LOC123064457/LOC123073752/LOC123098684/LOC123041664/LOC542782/LOC123073750/LOC123059970	8	4	123078150/123064457/542782/123073750	4	123073752/123098684/123041664/123059970
MF	GO:0061135	endopeptidase regulator activity	8/2465	47/32232	0.0249192	0.110641	123078150/123064457/123073752/123098684/123041664/542782/123073750/123059970	LOC123078150/LOC123064457/LOC123073752/LOC123098684/LOC123041664/LOC542782/LOC123073750/LOC123059970	8	4	123078150/123064457/542782/123073750	4	123073752/123098684/123041664/123059970
MF	GO:0016836	hydro-lyase activity	12/2465	84/32232	0.0257965	0.113029	123160552/123169615/123166700/123123214/123078640/123049559/123041365/123189133/123104876/123113163/123136200/123149009	LOC123160552/LOC123169615/LOC123166700/LOC123123214/LOC123078640/LOC123049559/LOC123041365/LOC123189133/LOC123104876/LOC123113163/LOC123136200/LOC123149009	12	5	123123214/123041365/123189133/123104876/123113163	7	123160552/123169615/123166700/123078640/123049559/123136200/123149009
MF	GO:0004867	serine-type endopeptidase inhibitor activity	5/2465	23/32232	0.0274468	0.118699	123064457/123073752/123098684/123073750/123059970	LOC123064457/LOC123073752/LOC123098684/LOC123073750/LOC123059970	5	2	123064457/123073750	3	123073752/123098684/123059970
MF	GO:0015399	primary active transmembrane transporter activity	21/2465	176/32232	0.0282361	0.11902	123190826/123061790/123046664/101290581/123190378/123051199/123158100/543450/123062023/123060539/123148002/123170290/123169633/123164763/123148233/543354/123054530/123150178/123093748/123169628/123098982	LOC123190826/LOC123061790/LOC123046664/LOC101290581/LOC123190378/LOC123051199/LOC123158100/LOC543450/LOC123062023/LOC123060539/LOC123148002/LOC123170290/LOC123169633/LOC123164763/LOC123148233/LOC543354/LOC123054530/LOC123150178/LOC123093748/LOC123169628/LOC123098982	21	17	123061790/123046664/101290581/123190378/123051199/123158100/543450/123148002/123170290/123169633/123164763/543354/123054530/123150178/123093748/123169628/123098982	4	123190826/123062023/123060539/123148233
MF	GO:0015405	P-P-bond-hydrolysis-driven transmembrane transporter activity	21/2465	176/32232	0.0282361	0.11902	123190826/123061790/123046664/101290581/123190378/123051199/123158100/543450/123062023/123060539/123148002/123170290/123169633/123164763/123148233/543354/123054530/123150178/123093748/123169628/123098982	LOC123190826/LOC123061790/LOC123046664/LOC101290581/LOC123190378/LOC123051199/LOC123158100/LOC543450/LOC123062023/LOC123060539/LOC123148002/LOC123170290/LOC123169633/LOC123164763/LOC123148233/LOC543354/LOC123054530/LOC123150178/LOC123093748/LOC123169628/LOC123098982	21	17	123061790/123046664/101290581/123190378/123051199/123158100/543450/123148002/123170290/123169633/123164763/543354/123054530/123150178/123093748/123169628/123098982	4	123190826/123062023/123060539/123148233
MF	GO:0016759	cellulose synthase activity	10/2465	67/32232	0.0304244	0.125078	123044580/123044576/123068318/123052445/123049142/123188320/123185146/123121827/123076710/123044579	LOC123044580/LOC123044576/LOC123068318/LOC123052445/LOC123049142/LOC123188320/LOC123185146/LOC123121827/LOC123076710/LOC123044579	10	7	123044580/123044576/123052445/123049142/123188320/123185146/123044579	3	123068318/123121827/123076710
MF	GO:0016760	cellulose synthase (UDP-forming) activity	10/2465	67/32232	0.0304244	0.125078	123044580/123044576/123068318/123052445/123049142/123188320/123185146/123121827/123076710/123044579	LOC123044580/LOC123044576/LOC123068318/LOC123052445/LOC123049142/LOC123188320/LOC123185146/LOC123121827/LOC123076710/LOC123044579	10	7	123044580/123044576/123052445/123049142/123188320/123185146/123044579	3	123068318/123121827/123076710
MF	GO:0015116	sulfate transmembrane transporter activity	5/2465	24/32232	0.0325496	0.130591	123079164/123098407/123070775/123150081/100136990	LOC123079164/LOC123098407/LOC123070775/LOC123150081/LOC100136990	5	5	123079164/123098407/123070775/123150081/100136990	0
MF	GO:1901682	sulfur compound transmembrane transporter activity	5/2465	24/32232	0.0325496	0.130591	123079164/123098407/123070775/123150081/100136990	LOC123079164/LOC123098407/LOC123070775/LOC123150081/LOC100136990	5	5	123079164/123098407/123070775/123150081/100136990	0
MF	GO:0004363	glutathione synthase activity	3/2465	10/32232	0.0356614	0.141372	123148878/123167324/123158946	LOC123148878/LOC123167324/LOC123158946	3	3	123148878/123167324/123158946	0
MF	GO:0030976	thiamine pyrophosphate binding	4/2465	17/32232	0.0363122	0.142258	123072164/123085585/123092445/123080437	LOC123072164/LOC123085585/LOC123092445/LOC123080437	4	4	123072164/123085585/123092445/123080437	0
MF	GO:0004650	polygalacturonase activity	9/2465	60/32232	0.037772	0.146257	123105925/123143035/123182459/123060823/123182845/123137922/123093755/123165641/123098989	LOC123105925/LOC123143035/LOC123182459/LOC123060823/LOC123182845/LOC123137922/LOC123093755/LOC123165641/LOC123098989	9	3	123105925/123093755/123098989	6	123143035/123182459/123060823/123182845/123137922/123165641
MF	GO:0008081	phosphoric diester hydrolase activity	10/2465	70/32232	0.0396597	0.151801	123111429/123120543/123103306/123189219/123159747/123188021/123103237/123119165/123104595/123137153	LOC123111429/LOC123120543/LOC123103306/LOC123189219/LOC123159747/LOC123188021/LOC123103237/LOC123119165/LOC123104595/LOC123137153	10	8	123111429/123120543/123103306/123189219/123188021/123103237/123104595/123137153	2	123159747/123119165
MF	GO:0004435	phosphatidylinositol phospholipase C activity	3/2465	11/32232	0.0463075	0.167613	123111429/123120543/123103237	LOC123111429/LOC123120543/LOC123103237	3	3	123111429/123120543/123103237	0
MF	GO:0004629	phospholipase C activity	3/2465	11/32232	0.0463075	0.167613	123111429/123120543/123103237	LOC123111429/LOC123120543/LOC123103237	3	3	123111429/123120543/123103237	0
MF	GO:0008131	primary amine oxidase activity	3/2465	11/32232	0.0463075	0.167613	123045745/123084804/123043469	LOC123045745/LOC123084804/LOC123043469	3	2	123084804/123043469	1	123045745
MF	GO:0016641	oxidoreductase activity, acting on the CH-NH2 group of donors, oxygen as acceptor	3/2465	11/32232	0.0463075	0.167613	123045745/123084804/123043469	LOC123045745/LOC123084804/LOC123043469	3	2	123084804/123043469	1	123045745
MF	GO:0048038	quinone binding	3/2465	11/32232	0.0463075	0.167613	123045745/123084804/123043469	LOC123045745/LOC123084804/LOC123043469	3	2	123084804/123043469	1	123045745
MF	GO:0004519	endonuclease activity	19/2465	165/32232	0.0482144	0.172639	123121102/542947/123181837/123090606/543132/123117142/123181023/123044111/123054895/123165990/123054064/123050333/123185356/123190737/123054894/123167492/123051992/123131101/123041280	LOC123121102/LOC542947/LOC123181837/LOC123090606/LOC543132/LOC123117142/LOC123181023/LOC123044111/LOC123054895/LOC123165990/LOC123054064/LOC123050333/LOC123185356/LOC123190737/LOC123054894/LOC123167492/LOC123051992/LOC123131101/LOC123041280	19	17	123121102/542947/123181837/123090606/543132/123117142/123181023/123044111/123054895/123165990/123054064/123050333/123190737/123054894/123167492/123051992/123131101	2	123185356/123041280
MF	GO:0008236	serine-type peptidase activity	37/2465	366/32232	0.0504531	0.173325	123181391/123160938/123104450/123074874/123151037/123086747/123080409/123093805/123112392/123099038/123105980/123167775/123046387/123149298/543105/123078192/123158992/123105112/123072133/123138514/123054234/123177784/123051772/123062010/123049653/123181301/123149480/123124002/123069706/123169770/123165333/123054075/123070900/123113405/123152357/123103620/123190073	LOC123181391/LOC123160938/LOC123104450/LOC123074874/LOC123151037/LOC123086747/LOC123080409/LOC123093805/LOC123112392/LOC123099038/LOC123105980/LOC123167775/LOC123046387/LOC123149298/LOC543105/LOC123078192/LOC123158992/LOC123105112/LOC123072133/LOC123138514/LOC123054234/LOC123177784/LOC123051772/LOC123062010/LOC123049653/LOC123181301/LOC123149480/LOC123124002/LOC123069706/LOC123169770/LOC123165333…	37	30	123181391/123160938/123104450/123074874/123151037/123086747/123080409/123093805/123112392/123099038/123105980/123167775/123046387/123078192/123105112/123072133/123138514/123054234/123177784/123062010/123049653/123181301/123124002/123069706/123165333/123054075/123070900/123113405/123152357/123103620	7	123149298/543105/123158992/123051772/123149480/123169770/123190073
MF	GO:0017171	serine hydrolase activity	37/2465	366/32232	0.0504531	0.173325	123181391/123160938/123104450/123074874/123151037/123086747/123080409/123093805/123112392/123099038/123105980/123167775/123046387/123149298/543105/123078192/123158992/123105112/123072133/123138514/123054234/123177784/123051772/123062010/123049653/123181301/123149480/123124002/123069706/123169770/123165333/123054075/123070900/123113405/123152357/123103620/123190073	LOC123181391/LOC123160938/LOC123104450/LOC123074874/LOC123151037/LOC123086747/LOC123080409/LOC123093805/LOC123112392/LOC123099038/LOC123105980/LOC123167775/LOC123046387/LOC123149298/LOC543105/LOC123078192/LOC123158992/LOC123105112/LOC123072133/LOC123138514/LOC123054234/LOC123177784/LOC123051772/LOC123062010/LOC123049653/LOC123181301/LOC123149480/LOC123124002/LOC123069706/LOC123169770/LOC123165333…	37	30	123181391/123160938/123104450/123074874/123151037/123086747/123080409/123093805/123112392/123099038/123105980/123167775/123046387/123078192/123105112/123072133/123138514/123054234/123177784/123062010/123049653/123181301/123124002/123069706/123165333/123054075/123070900/123113405/123152357/123103620	7	123149298/543105/123158992/123051772/123149480/123169770/123190073
MF	GO:0015035	protein disulfide oxidoreductase activity	13/2465	103/32232	0.0504882	0.173325	123106502/123115661/123115654/123162645/123115656/123058447/123096892/123124288/123124287/123065513/123106511/123106505/542961	LOC123106502/LOC123115661/LOC123115654/LOC123162645/LOC123115656/LOC123058447/LOC123096892/LOC123124288/LOC123124287/LOC123065513/LOC123106511/LOC123106505/LOC542961	13	4	123162645/123058447/123065513/542961	9	123106502/123115661/123115654/123115656/123096892/123124288/123124287/123106511/123106505
MF	GO:0015036	disulfide oxidoreductase activity	13/2465	103/32232	0.0504882	0.173325	123106502/123115661/123115654/123162645/123115656/123058447/123096892/123124288/123124287/123065513/123106511/123106505/542961	LOC123106502/LOC123115661/LOC123115654/LOC123162645/LOC123115656/LOC123058447/LOC123096892/LOC123124288/LOC123124287/LOC123065513/LOC123106511/LOC123106505/LOC542961	13	4	123162645/123058447/123065513/542961	9	123106502/123115661/123115654/123115656/123096892/123124288/123124287/123106511/123106505
MF	GO:0016903	oxidoreductase activity, acting on the aldehyde or oxo group of donors	8/2465	54/32232	0.051687	0.17563	123167622/100682406/123111084/123102909/123150992/123160228/123091068/123122915	LOC123167622/LOC100682406/LOC123111084/LOC123102909/LOC123150992/LOC123160228/LOC123091068/LOC123122915	8	8	123167622/100682406/123111084/123102909/123150992/123160228/123091068/123122915	0
MF	GO:0022836	gated channel activity	11/2465	84/32232	0.0549278	0.18291	123070428/123113787/123078872/123053389/123045549/123105489/123143623/123123272/123189297/123136113/123132086	LOC123070428/LOC123113787/LOC123078872/LOC123053389/LOC123045549/LOC123105489/LOC123143623/LOC123123272/LOC123189297/LOC123136113/LOC123132086	11	3	123053389/123045549/123189297	8	123070428/123113787/123078872/123105489/123143623/123123272/123136113/123132086
MF	GO:0022839	ion gated channel activity	11/2465	84/32232	0.0549278	0.18291	123070428/123113787/123078872/123053389/123045549/123105489/123143623/123123272/123189297/123136113/123132086	LOC123070428/LOC123113787/LOC123078872/LOC123053389/LOC123045549/LOC123105489/LOC123143623/LOC123123272/LOC123189297/LOC123136113/LOC123132086	11	3	123053389/123045549/123189297	8	123070428/123113787/123078872/123105489/123143623/123123272/123136113/123132086
MF	GO:0009001	serine O-acetyltransferase activity	3/2465	12/32232	0.0583251	0.185756	123098400/123093127/123084953	LOC123098400/LOC123093127/LOC123084953	3	0		3	123098400/123093127/123084953
MF	GO:0016412	serine O-acyltransferase activity	3/2465	12/32232	0.0583251	0.185756	123098400/123093127/123084953	LOC123098400/LOC123093127/LOC123084953	3	0		3	123098400/123093127/123084953
MF	GO:0016413	O-acetyltransferase activity	3/2465	12/32232	0.0583251	0.185756	123098400/123093127/123084953	LOC123098400/LOC123093127/LOC123084953	3	0		3	123098400/123093127/123084953
MF	GO:0016846	carbon-sulfur lyase activity	3/2465	12/32232	0.0583251	0.185756	123121464/123060273/123103686	LOC123121464/LOC123060273/LOC123103686	3	2	123121464/123103686	1	123060273
MF	GO:0004427	inorganic diphosphatase activity	5/2465	28/32232	0.0585716	0.185756	123158100/543450/123164763/123105264/123182154	LOC123158100/LOC543450/LOC123164763/LOC123105264/LOC123182154	5	5	123158100/543450/123164763/123105264/123182154	0
MF	GO:0016881	acid-amino acid ligase activity	4/2465	20/32232	0.0616765	0.193757	123148878/123167324/123051441/123158946	LOC123148878/LOC123167324/LOC123051441/LOC123158946	4	4	123148878/123167324/123051441/123158946	0
MF	GO:0016831	carboxy-lyase activity	13/2465	107/32232	0.0647741	0.201587	123092719/123098016/123060630/123085323/123100106/123164058/123092844/123156484/123075872/123147894/123149505/123069406/123085230	LOC123092719/LOC123098016/LOC123060630/LOC123085323/LOC123100106/LOC123164058/LOC123092844/LOC123156484/LOC123075872/LOC123147894/LOC123149505/LOC123069406/LOC123085230	13	8	123092719/123098016/123085323/123100106/123092844/123075872/123149505/123085230	5	123060630/123164058/123156484/123147894/123069406
MF	GO:0004521	endoribonuclease activity	15/2465	129/32232	0.0682089	0.210311	123121102/542947/123181837/123090606/543132/123117142/123181023/123044111/123165990/123054064/123185356/123167492/123051992/123131101/123041280	LOC123121102/LOC542947/LOC123181837/LOC123090606/LOC543132/LOC123117142/LOC123181023/LOC123044111/LOC123165990/LOC123054064/LOC123185356/LOC123167492/LOC123051992/LOC123131101/LOC123041280	15	13	123121102/542947/123181837/123090606/543132/123117142/123181023/123044111/123165990/123054064/123167492/123051992/123131101	2	123185356/123041280
MF	GO:0005216	ion channel activity	16/2465	143/32232	0.0803882	0.243357	123070428/123113787/123078872/123053389/123045549/123105489/123132598/123149652/123143623/123123272/123137377/123182526/123189297/123136113/123132086/123159285	LOC123070428/LOC123113787/LOC123078872/LOC123053389/LOC123045549/LOC123105489/LOC123132598/LOC123149652/LOC123143623/LOC123123272/LOC123137377/LOC123182526/LOC123189297/LOC123136113/LOC123132086/LOC123159285	16	6	123053389/123045549/123149652/123137377/123189297/123159285	10	123070428/123113787/123078872/123105489/123132598/123143623/123123272/123182526/123136113/123132086
MF	GO:0022838	substrate-specific channel activity	16/2465	143/32232	0.0803882	0.243357	123070428/123113787/123078872/123053389/123045549/123105489/123132598/123149652/123143623/123123272/123137377/123182526/123189297/123136113/123132086/123159285	LOC123070428/LOC123113787/LOC123078872/LOC123053389/LOC123045549/LOC123105489/LOC123132598/LOC123149652/LOC123143623/LOC123123272/LOC123137377/LOC123182526/LOC123189297/LOC123136113/LOC123132086/LOC123159285	16	6	123053389/123045549/123149652/123137377/123189297/123159285	10	123070428/123113787/123078872/123105489/123132598/123143623/123123272/123182526/123136113/123132086
MF	GO:0008146	sulfotransferase activity	8/2465	60/32232	0.0855356	0.254316	123190907/123080570/123053943/123046062/123142425/123043110/123057547/123084628	LOC123190907/LOC123080570/LOC123053943/LOC123046062/LOC123142425/LOC123043110/LOC123057547/LOC123084628	8	5	123053943/123046062/123142425/123057547/123084628	3	123190907/123080570/123043110
MF	GO:0016782	transferase activity, transferring sulfur-containing groups	8/2465	60/32232	0.0855356	0.254316	123190907/123080570/123053943/123046062/123142425/123043110/123057547/123084628	LOC123190907/LOC123080570/LOC123053943/LOC123046062/LOC123142425/LOC123043110/LOC123057547/LOC123084628	8	5	123053943/123046062/123142425/123057547/123084628	3	123190907/123080570/123043110
MF	GO:0016667	oxidoreductase activity, acting on a sulfur group of donors	15/2465	135/32232	0.0923918	0.27227	123106502/123115661/123115654/123162645/123115656/123058447/123096892/123124288/123124287/123053668/123065513/123106511/123106505/542961/123045780	LOC123106502/LOC123115661/LOC123115654/LOC123162645/LOC123115656/LOC123058447/LOC123096892/LOC123124288/LOC123124287/LOC123053668/LOC123065513/LOC123106511/LOC123106505/LOC542961/LOC123045780	15	6	123162645/123058447/123053668/123065513/542961/123045780	9	123106502/123115661/123115654/123115656/123096892/123124288/123124287/123106511/123106505
MF	GO:0042626	ATPase activity, coupled to transmembrane movement of substances	18/2465	169/32232	0.0961633	0.278455	123190826/123061790/123046664/101290581/123190378/123051199/123062023/123060539/123148002/123170290/123169633/123148233/543354/123054530/123150178/123093748/123169628/123098982	LOC123190826/LOC123061790/LOC123046664/LOC101290581/LOC123190378/LOC123051199/LOC123062023/LOC123060539/LOC123148002/LOC123170290/LOC123169633/LOC123148233/LOC543354/LOC123054530/LOC123150178/LOC123093748/LOC123169628/LOC123098982	18	14	123061790/123046664/101290581/123190378/123051199/123148002/123170290/123169633/543354/123054530/123150178/123093748/123169628/123098982	4	123190826/123062023/123060539/123148233
MF	GO:0043492	ATPase activity, coupled to movement of substances	18/2465	169/32232	0.0961633	0.278455	123190826/123061790/123046664/101290581/123190378/123051199/123062023/123060539/123148002/123170290/123169633/123148233/543354/123054530/123150178/123093748/123169628/123098982	LOC123190826/LOC123061790/LOC123046664/LOC101290581/LOC123190378/LOC123051199/LOC123062023/LOC123060539/LOC123148002/LOC123170290/LOC123169633/LOC123148233/LOC543354/LOC123054530/LOC123150178/LOC123093748/LOC123169628/LOC123098982	18	14	123061790/123046664/101290581/123190378/123051199/123148002/123170290/123169633/543354/123054530/123150178/123093748/123169628/123098982	4	123190826/123062023/123060539/123148233
MF	GO:0051287	NAD binding	13/2465	115/32232	0.100753	0.287416	123122887/123113372/543428/123105079/123150759/100137005/100286394/123079048/123087083/123122915/123090881/123051097/123095906	LOC123122887/LOC123113372/LOC543428/LOC123105079/LOC123150759/LOC100137005/LOC100286394/LOC123079048/LOC123087083/LOC123122915/LOC123090881/LOC123051097/LOC123095906	13	13	123122887/123113372/543428/123105079/123150759/100137005/100286394/123079048/123087083/123122915/123090881/123051097/123095906	0
MF	GO:0004066	asparagine synthase (glutamine-hydrolyzing) activity	3/2465	15/32232	0.101847	0.287416	123120509/123103220/606323	LOC123120509/LOC123103220/LOC606323	3	3	123120509/123103220/606323	0
MF	GO:0004556	alpha-amylase activity	3/2465	15/32232	0.101847	0.287416	123165490/123138358/123164937	LOC123165490/LOC123138358/LOC123164937	3	2	123165490/123164937	1	123138358
MF	GO:0003872	6-phosphofructokinase activity	5/2465	33/32232	0.103791	0.288021	123053591/123045718/123167365/123182687/123189489	LOC123053591/LOC123045718/LOC123167365/LOC123182687/LOC123189489	5	4	123053591/123045718/123182687/123189489	1	123167365
MF	GO:0016840	carbon-nitrogen lyase activity	5/2465	33/32232	0.103791	0.288021	123044226/123122848/123181559/123113335/123092316	LOC123044226/LOC123122848/LOC123181559/LOC123113335/LOC123092316	5	5	123044226/123122848/123181559/123113335/123092316	0
MF	GO:0016843	amine-lyase activity	4/2465	24/32232	0.106567	0.290876	123044226/123122848/123181559/123113335	LOC123044226/LOC123122848/LOC123181559/LOC123113335	4	4	123044226/123122848/123181559/123113335	0
MF	GO:0016844	strictosidine synthase activity	4/2465	24/32232	0.106567	0.290876	123044226/123122848/123181559/123113335	LOC123044226/LOC123122848/LOC123181559/LOC123113335	4	4	123044226/123122848/123181559/123113335	0
MF	GO:0005507	copper ion binding	12/2465	106/32232	0.110706	0.299716	123169232/123045745/123084804/123165179/123043469/123141804/123167490/123162043/123168000/123130969/123086301/123088590	LOC123169232/LOC123045745/LOC123084804/LOC123165179/LOC123043469/LOC123141804/LOC123167490/LOC123162043/LOC123168000/LOC123130969/LOC123086301/LOC123088590	12	9	123169232/123084804/123165179/123043469/123141804/123162043/123168000/123130969/123088590	3	123045745/123167490/123086301
MF	GO:0003729	mRNA binding	3/2465	16/32232	0.118541	0.318339	123151266/123160920/123165686	LOC123151266/LOC123160920/LOC123165686	3	3	123151266/123160920/123165686	0
MF	GO:0008194	UDP-glycosyltransferase activity	24/2465	246/32232	0.130894	0.348702	123044580/123092190/123044576/123052082/123097521/123068318/123052445/123049142/123085854/123188320/606374/123185146/123121827/542972/123055781/123070487/123076710/123044579/606397/123187938/123063086/123188945/123078904/123180205	LOC123044580/LOC123092190/LOC123044576/LOC123052082/LOC123097521/LOC123068318/LOC123052445/LOC123049142/LOC123085854/LOC123188320/LOC606374/LOC123185146/LOC123121827/LOC542972/LOC123055781/LOC123070487/LOC123076710/LOC123044579/LOC606397/LOC123187938/LOC123063086/LOC123188945/LOC123078904/LOC123180205	24	21	123044580/123092190/123044576/123052082/123097521/123052445/123049142/123085854/123188320/606374/123185146/542972/123055781/123070487/123044579/606397/123187938/123063086/123188945/123078904/123180205	3	123068318/123121827/123076710
MF	GO:0000988	transcription factor activity, protein binding	9/2465	78/32232	0.14053	0.365599	123080180/123045781/123071865/123189553/123053669/123189551/123062985/123045784/123071866	LOC123080180/LOC123045781/LOC123071865/LOC123189553/LOC123053669/LOC123189551/LOC123062985/LOC123045784/LOC123071866	9	3	123045781/123053669/123189551	6	123080180/123071865/123189553/123062985/123045784/123071866
MF	GO:0000989	transcription factor activity, transcription factor binding	9/2465	78/32232	0.14053	0.365599	123080180/123045781/123071865/123189553/123053669/123189551/123062985/123045784/123071866	LOC123080180/LOC123045781/LOC123071865/LOC123189553/LOC123053669/LOC123189551/LOC123062985/LOC123045784/LOC123071866	9	3	123045781/123053669/123189551	6	123080180/123071865/123189553/123062985/123045784/123071866
MF	GO:0003712	transcription cofactor activity	9/2465	78/32232	0.14053	0.365599	123080180/123045781/123071865/123189553/123053669/123189551/123062985/123045784/123071866	LOC123080180/LOC123045781/LOC123071865/LOC123189553/LOC123053669/LOC123189551/LOC123062985/LOC123045784/LOC123071866	9	3	123045781/123053669/123189551	6	123080180/123071865/123189553/123062985/123045784/123071866
MF	GO:0004144	diacylglycerol O-acyltransferase activity	4/2465	27/32232	0.147523	0.373068	123065590/123068299/123140708/123057498	LOC123065590/LOC123068299/LOC123140708/LOC123057498	4	1	123065590	3	123068299/123140708/123057498
MF	GO:0016411	acylglycerol O-acyltransferase activity	4/2465	27/32232	0.147523	0.373068	123065590/123068299/123140708/123057498	LOC123065590/LOC123068299/LOC123140708/LOC123057498	4	1	123065590	3	123068299/123140708/123057498
MF	GO:0016765	transferase activity, transferring alkyl or aryl (other than methyl) groups	10/2465	90/32232	0.149144	0.373068	123127933/123137700/123127932/123137699/123088173/123165688/123069861/123165791/100192183/123088098	LOC123127933/LOC123137700/LOC123127932/LOC123137699/LOC123088173/LOC123165688/LOC123069861/LOC123165791/LOC100192183/LOC123088098	10	9	123127933/123137700/123127932/123137699/123088173/123165688/123069861/123165791/100192183	1	123088098
MF	GO:1901681	sulfur compound binding	5/2465	37/32232	0.149302	0.373068	123072164/123085585/123092445/123051558/123080437	LOC123072164/LOC123085585/LOC123092445/LOC123051558/LOC123080437	5	4	123072164/123085585/123092445/123080437	1	123051558
MF	GO:0004143	diacylglycerol kinase activity	3/2465	18/32232	0.154605	0.373068	123053623/123181820/123130282	LOC123053623/LOC123181820/LOC123130282	3	3	123053623/123181820/123130282	0
MF	GO:0004470	malic enzyme activity	3/2465	18/32232	0.154605	0.373068	100137005/100286394/123079048	LOC100137005/LOC100286394/LOC123079048	3	3	100137005/100286394/123079048	0
MF	GO:0004471	malate dehydrogenase (decarboxylating) (NAD+) activity	3/2465	18/32232	0.154605	0.373068	100137005/100286394/123079048	LOC100137005/LOC100286394/LOC123079048	3	3	100137005/100286394/123079048	0
MF	GO:0016615	malate dehydrogenase activity	3/2465	18/32232	0.154605	0.373068	100137005/100286394/123079048	LOC100137005/LOC100286394/LOC123079048	3	3	100137005/100286394/123079048	0
MF	GO:0016638	oxidoreductase activity, acting on the CH-NH2 group of donors	3/2465	18/32232	0.154605	0.373068	123045745/123084804/123043469	LOC123045745/LOC123084804/LOC123043469	3	2	123084804/123043469	1	123045745
MF	GO:0070566	adenylyltransferase activity	3/2465	18/32232	0.154605	0.373068	123113276/123104987/123187027	LOC123113276/LOC123104987/LOC123187027	3	2	123113276/123104987	1	123187027
MF	GO:0016879	ligase activity, forming carbon-nitrogen bonds	10/2465	91/32232	0.156827	0.375704	123148878/123167324/123051441/123120509/123090862/123103220/123092924/123069137/606323/123158946	LOC123148878/LOC123167324/LOC123051441/LOC123120509/LOC123090862/LOC123103220/LOC123092924/LOC123069137/LOC606323/LOC123158946	10	9	123148878/123167324/123051441/123120509/123090862/123103220/123092924/606323/123158946	1	123069137
MF	GO:0004568	chitinase activity	6/2465	48/32232	0.157953	0.375704	123117018/123125582/123121979/123053755/542839/123105823	LOC123117018/LOC123125582/LOC123121979/LOC123053755/LOC542839/LOC123105823	6	6	123117018/123125582/123121979/123053755/542839/123105823	0
MF	GO:0010181	FMN binding	7/2465	59/32232	0.162525	0.383836	101290675/123159727/123167237/123104806/123043182/123153478/123113472	LOC101290675/LOC123159727/LOC123167237/LOC123104806/LOC123043182/LOC123153478/LOC123113472	7	5	123159727/123167237/123104806/123153478/123113472	2	101290675/123043182
MF	GO:0003993	acid phosphatase activity	7/2465	60/32232	0.172693	0.39852	123134796/123120215/123110640/123141998/123112567/123110651/123104307	LOC123134796/LOC123120215/LOC123110640/LOC123141998/LOC123112567/LOC123110651/LOC123104307	7	7	123134796/123120215/123110640/123141998/123112567/123110651/123104307	0
MF	GO:0004540	ribonuclease activity	15/2465	150/32232	0.173552	0.39852	123121102/542947/123181837/123090606/543132/123117142/123181023/123044111/123165990/123054064/123185356/123167492/123051992/123131101/123041280	LOC123121102/LOC542947/LOC123181837/LOC123090606/LOC543132/LOC123117142/LOC123181023/LOC123044111/LOC123165990/LOC123054064/LOC123185356/LOC123167492/LOC123051992/LOC123131101/LOC123041280	15	13	123121102/542947/123181837/123090606/543132/123117142/123181023/123044111/123165990/123054064/123167492/123051992/123131101	2	123185356/123041280
MF	GO:0016790	thiolester hydrolase activity	3/2465	19/32232	0.173768	0.39852	123168027/123148128/123070795	LOC123168027/LOC123148128/LOC123070795	3	3	123168027/123148128/123070795	0
MF	GO:0008443	phosphofructokinase activity	5/2465	39/32232	0.174726	0.39852	123053591/123045718/123167365/123182687/123189489	LOC123053591/LOC123045718/LOC123167365/LOC123182687/LOC123189489	5	4	123053591/123045718/123182687/123189489	1	123167365
MF	GO:0019200	carbohydrate kinase activity	5/2465	39/32232	0.174726	0.39852	123053591/123045718/123167365/123182687/123189489	LOC123053591/LOC123045718/LOC123167365/LOC123182687/LOC123189489	5	4	123053591/123045718/123182687/123189489	1	123167365
MF	GO:0016868	intramolecular transferase activity, phosphotransferases	4/2465	29/32232	0.177684	0.402508	123147790/123157257/123168117/123092239	LOC123147790/LOC123157257/LOC123168117/LOC123092239	4	4	123147790/123157257/123168117/123092239	0
MF	GO:0000287	magnesium ion binding	16/2465	166/32232	0.201697	0.448559	123072164/123039823/123140984/123184860/123085585/123140979/123092445/123135858/123133533/123080437/123090631/123069406/123105264/123099182/123140983/123182154	LOC123072164/LOC123039823/LOC123140984/LOC123184860/LOC123085585/LOC123140979/LOC123092445/LOC123135858/LOC123133533/LOC123080437/LOC123090631/LOC123069406/LOC123105264/LOC123099182/LOC123140983/LOC123182154	16	11	123072164/123039823/123140984/123085585/123140979/123092445/123133533/123080437/123105264/123140983/123182154	5	123184860/123135858/123090631/123069406/123099182
MF	GO:0016887	ATPase activity	37/2465	419/32232	0.202408	0.448559	123190826/123093652/123090461/123061790/123070092/123046664/101290581/123070611/123190378/123051199/123093200/123095543/123167102/123167943/123150032/123062023/123060539/123148002/123170290/123169633/123111447/123148233/543354/123087847/123159089/123188083/123084662/123105847/123054530/123150178/123123909/101290579/123148332/123093748/123169628/100286396/123098982	LOC123190826/LOC123093652/LOC123090461/LOC123061790/LOC123070092/LOC123046664/LOC101290581/LOC123070611/LOC123190378/LOC123051199/LOC123093200/LOC123095543/LOC123167102/LOC123167943/LOC123150032/LOC123062023/LOC123060539/LOC123148002/LOC123170290/LOC123169633/LOC123111447/LOC123148233/LOC543354/LOC123087847/LOC123159089/LOC123188083/LOC123084662/LOC123105847/LOC123054530/LOC123150178/LOC123123909…	37	24	123090461/123061790/123070092/123046664/101290581/123190378/123051199/123093200/123095543/123167943/123148002/123170290/123169633/543354/123188083/123084662/123054530/123150178/123123909/101290579/123148332/123093748/123169628/123098982	13	123190826/123093652/123070611/123167102/123150032/123062023/123060539/123111447/123148233/123087847/123159089/123105847/100286396
MF	GO:0008199	ferric iron binding	2/2465	11/32232	0.203522	0.448559	123062261/100270663	LOC123062261/LOC100270663	2	2	123062261/100270663	0
MF	GO:0004252	serine-type endopeptidase activity	18/2465	190/32232	0.204189	0.448559	123181391/123093805/123099038/123105980/123149298/123078192/123105112/123138514/123062010/123049653/123124002/123069706/123165333/123054075/123113405/123152357/123103620/123190073	LOC123181391/LOC123093805/LOC123099038/LOC123105980/LOC123149298/LOC123078192/LOC123105112/LOC123138514/LOC123062010/LOC123049653/LOC123124002/LOC123069706/LOC123165333/LOC123054075/LOC123113405/LOC123152357/LOC123103620/LOC123190073	18	16	123181391/123093805/123099038/123105980/123078192/123105112/123138514/123062010/123049653/123124002/123069706/123165333/123054075/123113405/123152357/123103620	2	123149298/123190073
MF	GO:0010333	terpene synthase activity	7/2465	63/32232	0.204748	0.448559	123039823/123140984/123184860/123140979/123135858/123133533/123140983	LOC123039823/LOC123140984/LOC123184860/LOC123140979/LOC123135858/LOC123133533/LOC123140983	7	5	123039823/123140984/123140979/123133533/123140983	2	123184860/123135858
MF	GO:0016830	carbon-carbon lyase activity	14/2465	147/32232	0.234279	0.507216	123092719/123098016/123060630/123085323/123100106/123164058/123092844/123156484/123079989/123075872/123147894/123149505/123069406/123085230	LOC123092719/LOC123098016/LOC123060630/LOC123085323/LOC123100106/LOC123164058/LOC123092844/LOC123156484/LOC123079989/LOC123075872/LOC123147894/LOC123149505/LOC123069406/LOC123085230	14	9	123092719/123098016/123085323/123100106/123092844/123079989/123075872/123149505/123085230	5	123060630/123164058/123156484/123147894/123069406
MF	GO:0016780	phosphotransferase activity, for other substituted phosphate groups	3/2465	22/32232	0.234569	0.507216	123155757/123163916/100415864	LOC123155757/LOC123163916/LOC100415864	3	3	123155757/123163916/100415864	0
MF	GO:0042578	phosphoric ester hydrolase activity	21/2465	233/32232	0.247406	0.531524	123134796/123111429/123120215/123084698/123110640/123098680/123157472/123120543/123103306/123189219/123159747/123141998/123061420/123112567/123188021/123103237/123119165/123110651/123104595/123137153/123104307	LOC123134796/LOC123111429/LOC123120215/LOC123084698/LOC123110640/LOC123098680/LOC123157472/LOC123120543/LOC123103306/LOC123189219/LOC123159747/LOC123141998/LOC123061420/LOC123112567/LOC123188021/LOC123103237/LOC123119165/LOC123110651/LOC123104595/LOC123137153/LOC123104307	21	17	123134796/123111429/123120215/123110640/123157472/123120543/123103306/123189219/123141998/123061420/123112567/123188021/123103237/123110651/123104595/123137153/123104307	4	123084698/123098680/123159747/123119165
MF	GO:0016838	carbon-oxygen lyase activity, acting on phosphates	7/2465	69/32232	0.274604	0.583619	123039823/123140984/123184860/123140979/123135858/123133533/123140983	LOC123039823/LOC123140984/LOC123184860/LOC123140979/LOC123135858/LOC123133533/LOC123140983	7	5	123039823/123140984/123140979/123133533/123140983	2	123184860/123135858
MF	GO:0016884	carbon-nitrogen ligase activity, with glutamine as amido-N-donor	3/2465	24/32232	0.276912	0.583619	123120509/123103220/606323	LOC123120509/LOC123103220/LOC606323	3	3	123120509/123103220/606323	0
MF	GO:0019239	deaminase activity	3/2465	24/32232	0.276912	0.583619	123078820/123061734/123051393	LOC123078820/LOC123061734/LOC123051393	3	3	123078820/123061734/123051393	0
MF	GO:0008289	lipid binding	13/2465	142/32232	0.290705	0.605834	123128335/123145442/123159768/123165576/123072432/123080658/123082221/123096203/123150077/123053963/123138184/123053937/123187111	LOC123128335/LOC123145442/LOC123159768/LOC123165576/LOC123072432/LOC123080658/LOC123082221/LOC123096203/LOC123150077/LOC123053963/LOC123138184/LOC123053937/LOC123187111	13	9	123128335/123145442/123159768/123165576/123150077/123053963/123138184/123053937/123187111	4	123072432/123080658/123082221/123096203
MF	GO:0004602	glutathione peroxidase activity	2/2465	14/32232	0.291091	0.605834	123097394/123160997	LOC123097394/LOC123160997	2	1	123097394	1	123160997
MF	GO:0015018	galactosylgalactosylxylosylprotein 3-beta-glucuronosyltransferase activity	3/2465	25/32232	0.298366	0.613307	606374/606397/123180205	LOC606374/LOC606397/LOC123180205	3	3	606374/606397/123180205	0
MF	GO:0015020	glucuronosyltransferase activity	3/2465	25/32232	0.298366	0.613307	606374/606397/123180205	LOC606374/LOC606397/LOC123180205	3	3	606374/606397/123180205	0
MF	GO:0004185	serine-type carboxypeptidase activity	11/2465	120/32232	0.310915	0.635182	123104450/123074874/123086747/123080409/123112392/123046387/543105/123072133/123054234/123177784/123051772	LOC123104450/LOC123074874/LOC123086747/LOC123080409/LOC123112392/LOC123046387/LOC543105/LOC123072133/LOC123054234/LOC123177784/LOC123051772	11	9	123104450/123074874/123086747/123080409/123112392/123046387/123072133/123054234/123177784	2	543105/123051772
MF	GO:0071949	FAD binding	4/2465	37/32232	0.312965	0.635471	123148124/123165594/123185486/123157487	LOC123148124/LOC123165594/LOC123185486/LOC123157487	4	4	123148124/123165594/123185486/123157487	0
MF	GO:0003950	NAD+ ADP-ribosyltransferase activity	2/2465	15/32232	0.320206	0.642341	123085095/123092884	LOC123085095/LOC123092884	2	2	123085095/123092884	0
MF	GO:0032977	membrane insertase activity	2/2465	15/32232	0.320206	0.642341	123123766/123087654	LOC123123766/LOC123087654	2	2	123123766/123087654	0
MF	GO:0008374	O-acyltransferase activity	7/2465	74/32232	0.336784	0.671552	123098400/123065590/123068299/123140708/123057498/123093127/123084953	LOC123098400/LOC123065590/LOC123068299/LOC123140708/LOC123057498/LOC123093127/LOC123084953	7	1	123065590	6	123098400/123068299/123140708/123057498/123093127/123084953
MF	GO:0004620	phospholipase activity	3/2465	27/32232	0.341449	0.671804	123111429/123120543/123103237	LOC123111429/LOC123120543/LOC123103237	3	3	123111429/123120543/123103237	0
MF	GO:0004356	glutamate-ammonia ligase activity	2/2465	16/32232	0.349015	0.671804	123090862/123092924	LOC123090862/LOC123092924	2	2	123090862/123092924	0
MF	GO:0008725	DNA-3-methyladenine glycosylase activity	2/2465	16/32232	0.349015	0.671804	123079653/123058754	LOC123079653/LOC123058754	2	0		2	123079653/123058754
MF	GO:0016211	ammonia ligase activity	2/2465	16/32232	0.349015	0.671804	123090862/123092924	LOC123090862/LOC123092924	2	2	123090862/123092924	0
MF	GO:0016880	acid-ammonia (or amide) ligase activity	2/2465	16/32232	0.349015	0.671804	123090862/123092924	LOC123090862/LOC123092924	2	2	123090862/123092924	0
MF	GO:0043733	DNA-3-methylbase glycosylase activity	2/2465	16/32232	0.349015	0.671804	123079653/123058754	LOC123079653/LOC123058754	2	0		2	123079653/123058754
MF	GO:0070008	serine-type exopeptidase activity	12/2465	137/32232	0.355879	0.680409	123104450/123074874/123086747/123080409/123112392/123046387/543105/123072133/123054234/123177784/123051772/123190073	LOC123104450/LOC123074874/LOC123086747/LOC123080409/LOC123112392/LOC123046387/LOC543105/LOC123072133/LOC123054234/LOC123177784/LOC123051772/LOC123190073	12	9	123104450/123074874/123086747/123080409/123112392/123046387/123072133/123054234/123177784	3	543105/123051772/123190073
MF	GO:0046873	metal ion transmembrane transporter activity	16/2465	187/32232	0.357572	0.680409	123121414/123111848/123152478/123159986/123141760/123166399/123182347/123134486/123102567/123121696/123145391/123150115/123093043/123182620/123184889/123148024	LOC123121414/LOC123111848/LOC123152478/LOC123159986/LOC123141760/LOC123166399/LOC123182347/LOC123134486/LOC123102567/LOC123121696/LOC123145391/LOC123150115/LOC123093043/LOC123182620/LOC123184889/LOC123148024	16	10	123121414/123111848/123159986/123141760/123166399/123134486/123121696/123145391/123150115/123182620	6	123152478/123182347/123102567/123093043/123184889/123148024
MF	GO:0004180	carboxypeptidase activity	11/2465	125/32232	0.359632	0.68044	123104450/123074874/123086747/123080409/123112392/123046387/543105/123072133/123054234/123177784/123051772	LOC123104450/LOC123074874/LOC123086747/LOC123080409/LOC123112392/LOC123046387/LOC543105/LOC123072133/LOC123054234/LOC123177784/LOC123051772	11	9	123104450/123074874/123086747/123080409/123112392/123046387/123072133/123054234/123177784	2	543105/123051772
MF	GO:0008061	chitin binding	3/2465	28/32232	0.362941	0.682822	123053755/542839/123047602	LOC123053755/LOC542839/LOC123047602	3	3	123053755/542839/123047602	0
MF	GO:0004857	enzyme inhibitor activity	11/2465	126/32232	0.369517	0.691288	123050070/123050488/123186128/123078150/123064457/123073752/123098684/123041664/542782/123073750/123059970	LOC123050070/LOC123050488/LOC123186128/LOC123078150/LOC123064457/LOC123073752/LOC123098684/LOC123041664/LOC542782/LOC123073750/LOC123059970	11	6	123050070/123186128/123078150/123064457/542782/123073750	5	123050488/123073752/123098684/123041664/123059970
MF	GO:0010277	chlorophyllide a oxygenase [overall] activity	2/2465	17/32232	0.377396	0.702083	123063545/123168310	LOC123063545/LOC123168310	2	1	123168310	1	123063545
MF	GO:0003779	actin binding	7/2465	79/32232	0.40057	0.741054	123102278/123113980/123123483/123123487/543245/123063746/123113983	LOC123102278/LOC123113980/LOC123123483/LOC123123487/LOC543245/LOC123063746/LOC123113983	7	6	123102278/123113980/123123483/123123487/543245/123113983	1	123063746
MF	GO:0042623	ATPase activity, coupled	18/2465	220/32232	0.418301	0.769581	123190826/123061790/123046664/101290581/123190378/123051199/123062023/123060539/123148002/123170290/123169633/123148233/543354/123054530/123150178/123093748/123169628/123098982	LOC123190826/LOC123061790/LOC123046664/LOC101290581/LOC123190378/LOC123051199/LOC123062023/LOC123060539/LOC123148002/LOC123170290/LOC123169633/LOC123148233/LOC543354/LOC123054530/LOC123150178/LOC123093748/LOC123169628/LOC123098982	18	14	123061790/123046664/101290581/123190378/123051199/123148002/123170290/123169633/543354/123054530/123150178/123093748/123169628/123098982	4	123190826/123062023/123060539/123148233
MF	GO:0003905	alkylbase DNA N-glycosylase activity	2/2465	19/32232	0.432477	0.791291	123079653/123058754	LOC123079653/LOC123058754	2	0		2	123079653/123058754
MF	GO:0016810	hydrolase activity, acting on carbon-nitrogen (but not peptide) bonds	6/2465	70/32232	0.44825	0.808758	123095790/123189472/123090780/123078820/123087182/123061734	LOC123095790/LOC123189472/LOC123090780/LOC123078820/LOC123087182/LOC123061734	6	6	123095790/123189472/123090780/123078820/123087182/123061734	0
MF	GO:0000155	phosphorelay sensor kinase activity	2/2465	20/32232	0.459025	0.808758	123087086/123095904	LOC123087086/LOC123095904	2	0		2	123087086/123095904
MF	GO:0004673	protein histidine kinase activity	2/2465	20/32232	0.459025	0.808758	123087086/123095904	LOC123087086/LOC123095904	2	0		2	123087086/123095904
MF	GO:0004869	cysteine-type endopeptidase inhibitor activity	2/2465	20/32232	0.459025	0.808758	123078150/542782	LOC123078150/LOC542782	2	2	123078150/542782	0
MF	GO:0016703	oxidoreductase activity, acting on single donors with incorporation of molecular oxygen, incorporation of one atom of oxygen (internal monooxygenases or internal mixed function oxidases)	2/2465	20/32232	0.459025	0.808758	123063545/123168310	LOC123063545/LOC123168310	2	1	123168310	1	123063545
MF	GO:0016775	phosphotransferase activity, nitrogenous group as acceptor	2/2465	20/32232	0.459025	0.808758	123087086/123095904	LOC123087086/LOC123095904	2	0		2	123087086/123095904
MF	GO:0016814	hydrolase activity, acting on carbon-nitrogen (but not peptide) bonds, in cyclic amidines	2/2465	20/32232	0.459025	0.808758	123078820/123061734	LOC123078820/LOC123061734	2	2	123078820/123061734	0
MF	GO:0016298	lipase activity	3/2465	33/32232	0.467622	0.819569	123111429/123120543/123103237	LOC123111429/LOC123120543/LOC123103237	3	3	123111429/123120543/123103237	0
MF	GO:0016778	diphosphotransferase activity	2/2465	21/32232	0.484833	0.841443	123051558/123099182	LOC123051558/LOC123099182	2	0		2	123051558/123099182
MF	GO:0016811	hydrolase activity, acting on carbon-nitrogen (but not peptide) bonds, in linear amides	3/2465	34/32232	0.487683	0.841443	123095790/123090780/123087182	LOC123095790/LOC123090780/LOC123087182	3	3	123095790/123090780/123087182	0
MF	GO:0050664	oxidoreductase activity, acting on NAD(P)H, oxygen as acceptor	3/2465	34/32232	0.487683	0.841443	123078123/123182710/543151	LOC123078123/LOC123182710/LOC543151	3	3	123078123/123182710/543151	0
MF	GO:0016614	oxidoreductase activity, acting on CH-OH group of donors	19/2465	243/32232	0.494567	0.848923	123122887/123113372/543428/123105079/123144856/123137502/123150759/100137005/100286394/123104204/123079048/123087083/123090881/123045454/123051097/123095906/123053692/123127745/123068651	LOC123122887/LOC123113372/LOC543428/LOC123105079/LOC123144856/LOC123137502/LOC123150759/LOC100137005/LOC100286394/LOC123104204/LOC123079048/LOC123087083/LOC123090881/LOC123045454/LOC123051097/LOC123095906/LOC123053692/LOC123127745/LOC123068651	19	19	123122887/123113372/543428/123105079/123144856/123137502/123150759/100137005/100286394/123104204/123079048/123087083/123090881/123045454/123051097/123095906/123053692/123127745/123068651	0
MF	GO:0016651	oxidoreductase activity, acting on NAD(P)H	5/2465	61/32232	0.503945	0.853182	123078123/123062951/123046158/123182710/543151	LOC123078123/LOC123062951/LOC123046158/LOC123182710/LOC543151	5	3	123078123/123182710/543151	2	123062951/123046158
MF	GO:0003887	DNA-directed DNA polymerase activity	2/2465	22/32232	0.509859	0.853182	123062734/123079889	LOC123062734/LOC123079889	2	2	123062734/123079889	0
MF	GO:0015098	molybdate ion transmembrane transporter activity	2/2465	22/32232	0.509859	0.853182	123048932/123063357	LOC123048932/LOC123063357	2	1	123048932	1	123063357
MF	GO:0016655	oxidoreductase activity, acting on NAD(P)H, quinone or similar compound as acceptor	2/2465	22/32232	0.509859	0.853182	123062951/123046158	LOC123062951/LOC123046158	2	0		2	123062951/123046158
MF	GO:0019104	DNA N-glycosylase activity	2/2465	22/32232	0.509859	0.853182	123079653/123058754	LOC123079653/LOC123058754	2	0		2	123079653/123058754
MF	GO:0004497	monooxygenase activity	6/2465	75/32232	0.516031	0.859192	123063545/123122507/123085101/123106963/123168310/123104717	LOC123063545/LOC123122507/LOC123085101/LOC123106963/LOC123168310/LOC123104717	6	4	123085101/123106963/123168310/123104717	2	123063545/123122507
MF	GO:0016671	oxidoreductase activity, acting on a sulfur group of donors, disulfide as acceptor	2/2465	23/32232	0.534073	0.884807	123053668/123045780	LOC123053668/LOC123045780	2	2	123053668/123045780	0
MF	GO:0004425	indole-3-glycerol-phosphate synthase activity	1/2465	10/32232	0.548739	0.900148	123149505	LOC123149505	1	1	123149505	0
MF	GO:0004619	phosphoglycerate mutase activity	1/2465	10/32232	0.548739	0.900148	123092239	LOC123092239	1	1	123092239	0
MF	GO:0008238	exopeptidase activity	12/2465	158/32232	0.553116	0.902881	123104450/123074874/123086747/123080409/123112392/123046387/543105/123072133/123054234/123177784/123051772/123190073	LOC123104450/LOC123074874/LOC123086747/LOC123080409/LOC123112392/LOC123046387/LOC543105/LOC123072133/LOC123054234/LOC123177784/LOC123051772/LOC123190073	12	9	123104450/123074874/123086747/123080409/123112392/123046387/123072133/123054234/123177784	3	543105/123051772/123190073
MF	GO:0008565	protein transporter activity	2/2465	24/32232	0.557451	0.905518	123123766/123087654	LOC123123766/LOC123087654	2	2	123123766/123087654	0
MF	GO:0019205	nucleobase-containing compound kinase activity	1/2465	11/32232	0.583261	0.942844	123148246	LOC123148246	1	1	123148246	0
MF	GO:0034061	DNA polymerase activity	2/2465	26/32232	0.601653	0.961701	123062734/123079889	LOC123062734/LOC123079889	2	2	123062734/123079889	0
MF	GO:0003755	peptidyl-prolyl cis-trans isomerase activity	6/2465	82/32232	0.604832	0.961701	123131889/123044525/123129092/123057458/123064239/123128429	LOC123131889/LOC123044525/LOC123129092/LOC123057458/LOC123064239/LOC123128429	6	3	123131889/123129092/123128429	3	123044525/123057458/123064239
MF	GO:0016859	cis-trans isomerase activity	6/2465	82/32232	0.604832	0.961701	123131889/123044525/123129092/123057458/123064239/123128429	LOC123131889/LOC123044525/LOC123129092/LOC123057458/LOC123064239/LOC123128429	6	3	123131889/123129092/123128429	3	123044525/123057458/123064239
MF	GO:0016709	oxidoreductase activity, acting on paired donors, with incorporation or reduction of molecular oxygen, NAD(P)H as one donor, and incorporation of one atom of oxygen	4/2465	55/32232	0.614832	0.961701	123122507/123085101/123106963/123104717	LOC123122507/LOC123085101/LOC123106963/LOC123104717	4	3	123085101/123106963/123104717	1	123122507
MF	GO:0003860	3-hydroxyisobutyryl-CoA hydrolase activity	1/2465	12/32232	0.615142	0.961701	123070795	LOC123070795	1	1	123070795	0
MF	GO:0005381	iron ion transmembrane transporter activity	1/2465	12/32232	0.615142	0.961701	123102567	LOC123102567	1	0		1	123102567
MF	GO:0016289	CoA hydrolase activity	1/2465	12/32232	0.615142	0.961701	123070795	LOC123070795	1	1	123070795	0
MF	GO:0016616	oxidoreductase activity, acting on the CH-OH group of donors, NAD or NADP as acceptor	15/2465	208/32232	0.631565	0.97867	123122887/123113372/543428/123105079/123150759/100137005/100286394/123104204/123079048/123087083/123090881/123051097/123095906/123053692/123068651	LOC123122887/LOC123113372/LOC543428/LOC123105079/LOC123150759/LOC100137005/LOC100286394/LOC123104204/LOC123079048/LOC123087083/LOC123090881/LOC123051097/LOC123095906/LOC123053692/LOC123068651	15	15	123122887/123113372/543428/123105079/123150759/100137005/100286394/123104204/123079048/123087083/123090881/123051097/123095906/123053692/123068651	0
MF	GO:0016860	intramolecular oxidoreductase activity	3/2465	42/32232	0.632791	0.97867	123128593/123145716/123068341	LOC123128593/LOC123145716/LOC123068341	3	2	123128593/123145716	1	123068341
MF	GO:0004097	catechol oxidase activity	1/2465	13/32232	0.644586	0.97867	123055490	LOC123055490	1	1	123055490	0
MF	GO:0031406	carboxylic acid binding	1/2465	13/32232	0.644586	0.97867	123060757	LOC123060757	1	1	123060757	0
MF	GO:0043177	organic acid binding	1/2465	13/32232	0.644586	0.97867	123060757	LOC123060757	1	1	123060757	0
MF	GO:0002161	aminoacyl-tRNA editing activity	3/2465	43/32232	0.648778	0.97867	123181686/123138434/123052821	LOC123181686/LOC123138434/LOC123052821	3	1	123138434	2	123181686/123052821
MF	GO:0051536	iron-sulfur cluster binding	13/2465	183/32232	0.649507	0.97867	100240699/123145709/123181803/123177012/123138457/123063545/123099419/123086676/123159206/123045401/123091299/123168310/123113472	LOC100240699/LOC123145709/LOC123181803/LOC123177012/LOC123138457/LOC123063545/LOC123099419/LOC123086676/LOC123159206/LOC123045401/LOC123091299/LOC123168310/LOC123113472	13	8	123181803/123177012/123099419/123086676/123159206/123091299/123168310/123113472	5	100240699/123145709/123138457/123063545/123045401
MF	GO:0051540	metal cluster binding	13/2465	183/32232	0.649507	0.97867	100240699/123145709/123181803/123177012/123138457/123063545/123099419/123086676/123159206/123045401/123091299/123168310/123113472	LOC100240699/LOC123145709/LOC123181803/LOC123177012/LOC123138457/LOC123063545/LOC123099419/LOC123086676/LOC123159206/LOC123045401/LOC123091299/LOC123168310/LOC123113472	13	8	123181803/123177012/123099419/123086676/123159206/123091299/123168310/123113472	5	100240699/123145709/123138457/123063545/123045401
MF	GO:0004834	tryptophan synthase activity	1/2465	14/32232	0.671778	1	123123214	LOC123123214	1	1	123123214	0
MF	GO:0004518	nuclease activity	19/2465	271/32232	0.686761	1	123121102/542947/123181837/123090606/543132/123117142/123181023/123044111/123054895/123165990/123054064/123050333/123185356/123190737/123054894/123167492/123051992/123131101/123041280	LOC123121102/LOC542947/LOC123181837/LOC123090606/LOC543132/LOC123117142/LOC123181023/LOC123044111/LOC123054895/LOC123165990/LOC123054064/LOC123050333/LOC123185356/LOC123190737/LOC123054894/LOC123167492/LOC123051992/LOC123131101/LOC123041280	19	17	123121102/542947/123181837/123090606/543132/123117142/123181023/123044111/123054895/123165990/123054064/123050333/123190737/123054894/123167492/123051992/123131101	2	123185356/123041280
MF	GO:0009055	electron transfer activity	23/2465	327/32232	0.692566	1	100682479/778392/123106502/123115661/123087122/123115654/123099463/123094336/123162645/123115656/123058447/123096892/123065163/123045401/123124288/123124287/123074301/novel.1502/123065513/123139697/123106511/123106505/542961	LOC100682479/LOC778392/LOC123106502/LOC123115661/LOC123087122/LOC123115654/LOC123099463/LOC123094336/LOC123162645/LOC123115656/LOC123058447/LOC123096892/LOC123065163/LOC123045401/LOC123124288/LOC123124287/LOC123074301/-/LOC123065513/LOC123139697/LOC123106511/LOC123106505/LOC542961	23	11	100682479/778392/123087122/123099463/123094336/123162645/123058447/123065163/123074301/123065513/542961	12	123106502/123115661/123115654/123115656/123096892/123045401/123124288/123124287/novel.1502/123139697/123106511/123106505
MF	GO:0016799	hydrolase activity, hydrolyzing N-glycosyl compounds	3/2465	46/32232	0.693722	1	123140706/123079653/123058754	LOC123140706/LOC123079653/LOC123058754	3	0		3	123140706/123079653/123058754
MF	GO:0003883	CTP synthase activity	1/2465	15/32232	0.69689	1	123069137	LOC123069137	1	0		1	123069137
MF	GO:0004345	glucose-6-phosphate dehydrogenase activity	1/2465	15/32232	0.69689	1	123053692	LOC123053692	1	1	123053692	0
MF	GO:0004813	alanine-tRNA ligase activity	1/2465	15/32232	0.69689	1	123095949	LOC123095949	1	1	123095949	0
MF	GO:0005088	Ras guanyl-nucleotide exchange factor activity	1/2465	15/32232	0.69689	1	123137901	LOC123137901	1	1	123137901	0
MF	GO:0005089	Rho guanyl-nucleotide exchange factor activity	1/2465	15/32232	0.69689	1	123137901	LOC123137901	1	1	123137901	0
MF	GO:0016646	oxidoreductase activity, acting on the CH-NH group of donors, NAD or NADP as acceptor	1/2465	15/32232	0.69689	1	123113925	LOC123113925	1	1	123113925	0
MF	GO:0017048	Rho GTPase binding	1/2465	15/32232	0.69689	1	123137901	LOC123137901	1	1	123137901	0
MF	GO:0008237	metallopeptidase activity	9/2465	135/32232	0.712756	1	123127293/123159943/123144386/123071663/123165258/123099138/123128811/123045785/123130985	LOC123127293/LOC123159943/LOC123144386/LOC123071663/LOC123165258/LOC123099138/LOC123128811/LOC123045785/LOC123130985	9	6	123127293/123159943/123144386/123165258/123099138/123045785	3	123071663/123128811/123130985
MF	GO:0045156	electron transporter, transferring electrons within the cyclic electron transport pathway of photosynthesis activity	1/2465	16/32232	0.720082	1	novel.1502	-	1	0		1	novel.1502
MF	GO:0004222	metalloendopeptidase activity	7/2465	108/32232	0.727982	1	123159943/123071663/123165258/123099138/123128811/123045785/123130985	LOC123159943/LOC123071663/LOC123165258/LOC123099138/LOC123128811/LOC123045785/LOC123130985	7	4	123159943/123165258/123099138/123045785	3	123071663/123128811/123130985
MF	GO:0016763	transferase activity, transferring pentosyl groups	2/2465	33/32232	0.72988	1	123085095/123092884	LOC123085095/LOC123092884	2	2	123085095/123092884	0
MF	GO:0051537	2 iron, 2 sulfur cluster binding	2/2465	35/32232	0.759421	1	123063545/123168310	LOC123063545/LOC123168310	2	1	123168310	1	123063545
MF	GO:0003857	3-hydroxyacyl-CoA dehydrogenase activity	1/2465	18/32232	0.761279	1	123068651	LOC123068651	1	1	123068651	0
MF	GO:0047429	nucleoside-triphosphate diphosphatase activity	1/2465	18/32232	0.761279	1	123049667	LOC123049667	1	1	123049667	0
MF	GO:0016791	phosphatase activity	9/2465	143/32232	0.773423	1	123134796/123120215/123110640/123157472/123141998/123061420/123112567/123110651/123104307	LOC123134796/LOC123120215/LOC123110640/LOC123157472/LOC123141998/LOC123061420/LOC123112567/LOC123110651/LOC123104307	9	9	123134796/123120215/123110640/123157472/123141998/123061420/123112567/123110651/123104307	0
MF	GO:0016872	intramolecular lyase activity	1/2465	19/32232	0.779546	1	123165556	LOC123165556	1	1	123165556	0
MF	GO:0030597	RNA glycosylase activity	1/2465	19/32232	0.779546	1	123140706	LOC123140706	1	0		1	123140706
MF	GO:0030598	rRNA N-glycosylase activity	1/2465	19/32232	0.779546	1	123140706	LOC123140706	1	0		1	123140706
MF	GO:0004499	N,N-dimethylaniline monooxygenase activity	3/2465	53/32232	0.781397	1	123122507/123106963/123104717	LOC123122507/LOC123106963/LOC123104717	3	2	123106963/123104717	1	123122507
MF	GO:0008324	cation transmembrane transporter activity	25/2465	373/32232	0.781972	1	123121414/123076900/123111848/123136614/123092862/123152478/123159986/123085243/123068355/123141760/123098144/123166399/123182347/123134486/123102567/123054368/123121696/123145391/123150115/123046508/123093043/123182620/100127077/123184889/123148024	LOC123121414/LOC123076900/LOC123111848/LOC123136614/LOC123092862/LOC123152478/LOC123159986/LOC123085243/LOC123068355/LOC123141760/LOC123098144/LOC123166399/LOC123182347/LOC123134486/LOC123102567/LOC123054368/LOC123121696/LOC123145391/LOC123150115/LOC123046508/LOC123093043/LOC123182620/LOC100127077/LOC123184889/LOC123148024	25	15	123121414/123076900/123111848/123159986/123068355/123141760/123166399/123134486/123054368/123121696/123145391/123150115/123046508/123182620/100127077	10	123136614/123092862/123152478/123085243/123098144/123182347/123102567/123093043/123184889/123148024
MF	GO:0016853	isomerase activity	20/2465	303/32232	0.784322	1	123121283/123147790/123103511/123128593/123145716/123157257/123111728/123168117/123092239/123131889/123044525/123129092/123045651/123057458/123064239/123165556/123122059/123122365/123068341/123128429	LOC123121283/LOC123147790/LOC123103511/LOC123128593/LOC123145716/LOC123157257/LOC123111728/LOC123168117/LOC123092239/LOC123131889/LOC123044525/LOC123129092/LOC123045651/LOC123057458/LOC123064239/LOC123165556/LOC123122059/LOC123122365/LOC123068341/LOC123128429	20	11	123147790/123128593/123145716/123157257/123168117/123092239/123131889/123129092/123165556/123122059/123128429	9	123121283/123103511/123111728/123044525/123045651/123057458/123064239/123122365/123068341
MF	GO:0004332	fructose-bisphosphate aldolase activity	1/2465	20/32232	0.796416	1	123079989	LOC123079989	1	1	123079989	0
MF	GO:0019900	kinase binding	1/2465	21/32232	0.811995	1	123050156	LOC123050156	1	0		1	123050156
MF	GO:0019901	protein kinase binding	1/2465	21/32232	0.811995	1	123050156	LOC123050156	1	0		1	123050156
MF	GO:0046915	transition metal ion transmembrane transporter activity	1/2465	22/32232	0.826382	1	123102567	LOC123102567	1	0		1	123102567
MF	GO:0003968	RNA-directed 5'-3' RNA polymerase activity	1/2465	23/32232	0.839669	1	123053576	LOC123053576	1	1	123053576	0
MF	GO:0004559	alpha-mannosidase activity	1/2465	23/32232	0.839669	1	123123515	LOC123123515	1	0		1	123123515
MF	GO:0015923	mannosidase activity	1/2465	23/32232	0.839669	1	123123515	LOC123123515	1	0		1	123123515
MF	GO:0030145	manganese ion binding	1/2465	23/32232	0.839669	1	123092239	LOC123092239	1	1	123092239	0
MF	GO:0046912	transferase activity, transferring acyl groups, acyl groups converted into alkyl on transfer	1/2465	24/32232	0.851939	1	123053707	LOC123053707	1	1	123053707	0
MF	GO:0140102	catalytic activity, acting on a rRNA	1/2465	24/32232	0.851939	1	123140706	LOC123140706	1	0		1	123140706
MF	GO:0015077	monovalent inorganic cation transmembrane transporter activity	11/2465	187/32232	0.854449	1	123121414/123111848/123152478/123159986/123141760/123166399/123134486/123121696/123145391/123150115/100127077	LOC123121414/LOC123111848/LOC123152478/LOC123159986/LOC123141760/LOC123166399/LOC123134486/LOC123121696/LOC123145391/LOC123150115/LOC100127077	11	10	123121414/123111848/123159986/123141760/123166399/123134486/123121696/123145391/123150115/100127077	1	123152478
MF	GO:0050661	NADP binding	6/2465	110/32232	0.854587	1	123121084/123103441/123122507/123106963/123053692/123104717	LOC123121084/LOC123103441/LOC123122507/LOC123106963/LOC123053692/LOC123104717	6	3	123106963/123053692/123104717	3	123121084/123103441/123122507
MF	GO:0008378	galactosyltransferase activity	3/2465	62/32232	0.862582	1	123107076/123105501/123160236	LOC123107076/LOC123105501/LOC123160236	3	3	123107076/123105501/123160236	0
MF	GO:0015095	magnesium ion transmembrane transporter activity	1/2465	25/32232	0.863271	1	123182620	LOC123182620	1	1	123182620	0
MF	GO:0033218	amide binding	1/2465	26/32232	0.873736	1	123060757	LOC123060757	1	1	123060757	0
MF	GO:0004175	endopeptidase activity	25/2465	401/32232	0.880528	1	123181391/123093805/123099038/123105980/123149298/123078192/123105112/123138514/123159943/123062010/123049653/123071663/123124002/123165258/123099138/123128811/123069706/123165333/123054075/123045785/123113405/123152357/123103620/123190073/123130985	LOC123181391/LOC123093805/LOC123099038/LOC123105980/LOC123149298/LOC123078192/LOC123105112/LOC123138514/LOC123159943/LOC123062010/LOC123049653/LOC123071663/LOC123124002/LOC123165258/LOC123099138/LOC123128811/LOC123069706/LOC123165333/LOC123054075/LOC123045785/LOC123113405/LOC123152357/LOC123103620/LOC123190073/LOC123130985	25	20	123181391/123093805/123099038/123105980/123078192/123105112/123138514/123159943/123062010/123049653/123124002/123165258/123099138/123069706/123165333/123054075/123045785/123113405/123152357/123103620	5	123149298/123071663/123128811/123190073/123130985
MF	GO:0016627	oxidoreductase activity, acting on the CH-CH group of donors	4/2465	83/32232	0.887264	1	123128329/123145434/123187543/123138178	LOC123128329/LOC123145434/LOC123187543/LOC123138178	4	3	123128329/123145434/123138178	1	123187543
MF	GO:0016832	aldehyde-lyase activity	1/2465	28/32232	0.892325	1	123079989	LOC123079989	1	1	123079989	0
MF	GO:0016866	intramolecular transferase activity	4/2465	87/32232	0.90755	1	123147790/123157257/123168117/123092239	LOC123147790/LOC123157257/LOC123168117/LOC123092239	4	4	123147790/123157257/123168117/123092239	0
MF	GO:0019208	phosphatase regulator activity	1/2465	30/32232	0.908178	1	123149128	LOC123149128	1	1	123149128	0
MF	GO:0005516	calmodulin binding	3/2465	70/32232	0.911158	1	123076922/123068377/123075646	LOC123076922/LOC123068377/LOC123075646	3	2	123076922/123068377	1	123075646
MF	GO:0003916	DNA topoisomerase activity	1/2465	31/32232	0.915206	1	123122365	LOC123122365	1	0		1	123122365
MF	GO:0004743	pyruvate kinase activity	1/2465	31/32232	0.915206	1	123090631	LOC123090631	1	0		1	123090631
MF	GO:0030955	potassium ion binding	1/2465	31/32232	0.915206	1	123090631	LOC123090631	1	0		1	123090631
MF	GO:0031420	alkali metal ion binding	1/2465	31/32232	0.915206	1	123090631	LOC123090631	1	0		1	123090631
MF	GO:0008375	acetylglucosaminyltransferase activity	4/2465	90/32232	0.920567	1	123055781/123070487/123188945/123078904	LOC123055781/LOC123070487/LOC123188945/LOC123078904	4	4	123055781/123070487/123188945/123078904	0
MF	GO:0016861	intramolecular oxidoreductase activity, interconverting aldoses and ketoses	1/2465	32/32232	0.921697	1	123068341	LOC123068341	1	0		1	123068341
MF	GO:0005085	guanyl-nucleotide exchange factor activity	1/2465	33/32232	0.927692	1	123137901	LOC123137901	1	1	123137901	0
MF	GO:0019843	rRNA binding	2/2465	55/32232	0.930295	1	123156910/123104269	LOC123156910/LOC123104269	2	0		2	123156910/123104269
MF	GO:0016620	oxidoreductase activity, acting on the aldehyde or oxo group of donors, NAD or NADP as acceptor	1/2465	35/32232	0.938339	1	123122915	LOC123122915	1	1	123122915	0
MF	GO:0016278	lysine N-methyltransferase activity	2/2465	57/32232	0.93879	1	123187691/123180046	LOC123187691/LOC123180046	2	0		2	123187691/123180046
MF	GO:0016279	protein-lysine N-methyltransferase activity	2/2465	57/32232	0.93879	1	123187691/123180046	LOC123187691/LOC123180046	2	0		2	123187691/123180046
MF	GO:0018024	histone-lysine N-methyltransferase activity	2/2465	57/32232	0.93879	1	123187691/123180046	LOC123187691/LOC123180046	2	0		2	123187691/123180046
MF	GO:0042054	histone methyltransferase activity	2/2465	57/32232	0.93879	1	123187691/123180046	LOC123187691/LOC123180046	2	0		2	123187691/123180046
MF	GO:0008757	S-adenosylmethionine-dependent methyltransferase activity	4/2465	96/32232	0.941774	1	123114275/123123760/123187691/123180046	LOC123114275/LOC123123760/LOC123187691/LOC123180046	4	2	123114275/123123760	2	123187691/123180046
MF	GO:0051087	chaperone binding	1/2465	36/32232	0.94306	1	123122242	LOC123122242	1	1	123122242	0
MF	GO:0008276	protein methyltransferase activity	2/2465	60/32232	0.94971	1	123187691/123180046	LOC123187691/LOC123180046	2	0		2	123187691/123180046
MF	GO:0016874	ligase activity	19/2465	344/32232	0.94998	1	123148878/123167324/123051441/123120509/123181686/123164622/123090862/123103220/123157170/123092924/123069137/123085031/606323/123187682/123158946/123051777/123098306/123095949/123052821	LOC123148878/LOC123167324/LOC123051441/LOC123120509/LOC123181686/LOC123164622/LOC123090862/LOC123103220/LOC123157170/LOC123092924/LOC123069137/LOC123085031/LOC606323/LOC123187682/LOC123158946/LOC123051777/LOC123098306/LOC123095949/LOC123052821	19	11	123148878/123167324/123051441/123120509/123090862/123103220/123157170/123092924/606323/123158946/123095949	8	123181686/123164622/123069137/123085031/123187682/123051777/123098306/123052821
MF	GO:0022890	inorganic cation transmembrane transporter activity	17/2465	314/32232	0.951514	1	123121414/123111848/123152478/123159986/123141760/123166399/123182347/123134486/123102567/123121696/123145391/123150115/123093043/123182620/100127077/123184889/123148024	LOC123121414/LOC123111848/LOC123152478/LOC123159986/LOC123141760/LOC123166399/LOC123182347/LOC123134486/LOC123102567/LOC123121696/LOC123145391/LOC123150115/LOC123093043/LOC123182620/LOC100127077/LOC123184889/LOC123148024	17	11	123121414/123111848/123159986/123141760/123166399/123134486/123121696/123145391/123150115/123182620/100127077	6	123152478/123182347/123102567/123093043/123184889/123148024
MF	GO:0008170	N-methyltransferase activity	2/2465	66/32232	0.966228	1	123187691/123180046	LOC123187691/LOC123180046	2	0		2	123187691/123180046
MF	GO:0008092	cytoskeletal protein binding	14/2465	281/32232	0.970554	1	123102278/123113980/123061001/123078073/123047167/123123483/123123487/543245/123063746/novel.907/123149406/123096898/123113983/123141088	LOC123102278/LOC123113980/LOC123061001/LOC123078073/LOC123047167/LOC123123483/LOC123123487/LOC543245/LOC123063746/-/LOC123149406/LOC123096898/LOC123113983/LOC123141088	14	10	123102278/123113980/123047167/123123483/123123487/543245/123149406/123096898/123113983/123141088	4	123061001/123078073/123063746/novel.907
MF	GO:0016307	phosphatidylinositol phosphate kinase activity	1/2465	47/32232	0.976295	1	123101920	LOC123101920	1	1	123101920	0
MF	GO:0030234	enzyme regulator activity	12/2465	255/32232	0.977318	1	123050070/123050488/123149128/123186128/123078150/123064457/123073752/123098684/123041664/542782/123073750/123059970	LOC123050070/LOC123050488/LOC123149128/LOC123186128/LOC123078150/LOC123064457/LOC123073752/LOC123098684/LOC123041664/LOC542782/LOC123073750/LOC123059970	12	7	123050070/123149128/123186128/123078150/123064457/542782/123073750	5	123050488/123073752/123098684/123041664/123059970
MF	GO:0140097	catalytic activity, acting on DNA	6/2465	151/32232	0.977364	1	123062734/123079653/123149113/123122365/123079889/123058754	LOC123062734/LOC123079653/LOC123149113/LOC123122365/LOC123079889/LOC123058754	6	2	123062734/123079889	4	123079653/123149113/123122365/123058754
MF	GO:0015298	solute:cation antiporter activity	1/2465	48/32232	0.978111	1	100127077	LOC100127077	1	1	100127077	0
MF	GO:0015299	solute:proton antiporter activity	1/2465	48/32232	0.978111	1	100127077	LOC100127077	1	1	100127077	0
MF	GO:0008234	cysteine-type peptidase activity	11/2465	242/32232	0.980559	1	123077795/123182555/123184330/123062460/100037638/123074534/543234/123159935/123107839/123153660/123113120	LOC123077795/LOC123182555/LOC123184330/LOC123062460/LOC100037638/LOC123074534/LOC543234/LOC123159935/LOC123107839/LOC123153660/LOC123113120	11	7	123182555/123184330/123062460/100037638/543234/123159935/123113120	4	123077795/123074534/123107839/123153660
MF	GO:0004871	signal transducer activity	2/2465	75/32232	0.981618	1	123087086/123095904	LOC123087086/LOC123095904	2	0		2	123087086/123095904
MF	GO:0038023	signaling receptor activity	2/2465	75/32232	0.981618	1	123087086/123095904	LOC123087086/LOC123095904	2	0		2	123087086/123095904
MF	GO:0060089	molecular transducer activity	2/2465	75/32232	0.981618	1	123087086/123095904	LOC123087086/LOC123095904	2	0		2	123087086/123095904
MF	GO:0008017	microtubule binding	7/2465	181/32232	0.987278	1	123061001/123078073/123047167/novel.907/123149406/123096898/123141088	LOC123061001/LOC123078073/LOC123047167/-/LOC123149406/LOC123096898/LOC123141088	7	4	123047167/123149406/123096898/123141088	3	123061001/123078073/novel.907
MF	GO:0003678	DNA helicase activity	1/2465	56/32232	0.988429	1	123149113	LOC123149113	1	0		1	123149113
MF	GO:0004812	aminoacyl-tRNA ligase activity	7/2465	183/32232	0.988474	1	123181686/123164622/123157170/123085031/123098306/123095949/123052821	LOC123181686/LOC123164622/LOC123157170/LOC123085031/LOC123098306/LOC123095949/LOC123052821	7	2	123157170/123095949	5	123181686/123164622/123085031/123098306/123052821
MF	GO:0016875	ligase activity, forming carbon-oxygen bonds	7/2465	183/32232	0.988474	1	123181686/123164622/123157170/123085031/123098306/123095949/123052821	LOC123181686/LOC123164622/LOC123157170/LOC123085031/LOC123098306/LOC123095949/LOC123052821	7	2	123157170/123095949	5	123181686/123164622/123085031/123098306/123052821
MF	GO:0017016	Ras GTPase binding	1/2465	57/32232	0.989316	1	123137901	LOC123137901	1	1	123137901	0
MF	GO:0031267	small GTPase binding	1/2465	57/32232	0.989316	1	123137901	LOC123137901	1	1	123137901	0
MF	GO:0008047	enzyme activator activity	1/2465	58/32232	0.990134	1	123149128	LOC123149128	1	1	123149128	0
MF	GO:0003924	GTPase activity	16/2465	346/32232	0.991112	1	123160812/123168668/543261/123061716/123149111/123103302/123182447/123137750/123164695/123078765/123070313/123185380/123156833/123147963/123105434/123158940	LOC123160812/LOC123168668/LOC543261/LOC123061716/LOC123149111/LOC123103302/LOC123182447/LOC123137750/LOC123164695/LOC123078765/LOC123070313/LOC123185380/LOC123156833/LOC123147963/LOC123105434/LOC123158940	16	15	123160812/123168668/543261/123061716/123149111/123103302/123182447/123137750/123164695/123078765/123070313/123185380/123156833/123147963/123158940	1	123105434
MF	GO:0098772	molecular function regulator	13/2465	296/32232	0.991421	1	123050070/123050488/123149128/123186128/123078150/123064457/123073752/123098684/123041664/542782/123137901/123073750/123059970	LOC123050070/LOC123050488/LOC123149128/LOC123186128/LOC123078150/LOC123064457/LOC123073752/LOC123098684/LOC123041664/LOC542782/LOC123137901/LOC123073750/LOC123059970	13	8	123050070/123149128/123186128/123078150/123064457/542782/123137901/123073750	5	123050488/123073752/123098684/123041664/123059970
MF	GO:0003777	microtubule motor activity	5/2465	154/32232	0.992968	1	123061001/123078073/123149406/123096898/123141088	LOC123061001/LOC123078073/LOC123149406/LOC123096898/LOC123141088	5	3	123149406/123096898/123141088	2	123061001/123078073
MF	GO:0052689	carboxylic ester hydrolase activity	4/2465	134/32232	0.993147	1	123181686/123077378/123138434/123052821	LOC123181686/LOC123077378/LOC123138434/LOC123052821	4	2	123077378/123138434	2	123181686/123052821
MF	GO:0004842	ubiquitin-protein transferase activity	9/2465	234/32232	0.994211	1	123121415/123103637/123046695/123069358/123111877/123069466/123087943/123169178/123069458	LOC123121415/LOC123103637/LOC123046695/LOC123069358/LOC123111877/LOC123069466/LOC123087943/LOC123169178/LOC123069458	9	4	123121415/123103637/123069358/123111877	5	123046695/123069466/123087943/123169178/123069458
MF	GO:0019787	ubiquitin-like protein transferase activity	9/2465	234/32232	0.994211	1	123121415/123103637/123046695/123069358/123111877/123069466/123087943/123169178/123069458	LOC123121415/LOC123103637/LOC123046695/LOC123069358/LOC123111877/LOC123069466/LOC123087943/LOC123169178/LOC123069458	9	4	123121415/123103637/123069358/123111877	5	123046695/123069466/123087943/123169178/123069458
MF	GO:0004523	RNA-DNA hybrid ribonuclease activity	1/2465	66/32232	0.994786	1	123165990	LOC123165990	1	1	123165990	0
MF	GO:0001882	nucleoside binding	22/2465	464/32232	0.995502	1	123160812/123168668/123061716/543361/123103302/123113912/123105601/123085949/123164695/123146615/123062734/123135719/123078765/123070313/123185380/123156833/123147963/123114151/123079889/123043778/123123647/123158940	LOC123160812/LOC123168668/LOC123061716/LOC543361/LOC123103302/LOC123113912/LOC123105601/LOC123085949/LOC123164695/LOC123146615/LOC123062734/LOC123135719/LOC123078765/LOC123070313/LOC123185380/LOC123156833/LOC123147963/LOC123114151/LOC123079889/LOC123043778/LOC123123647/LOC123158940	22	17	123160812/123168668/123061716/543361/123103302/123113912/123105601/123164695/123062734/123078765/123070313/123185380/123156833/123147963/123079889/123043778/123158940	5	123085949/123146615/123135719/123114151/123123647
MF	GO:0015631	tubulin binding	7/2465	202/32232	0.995614	1	123061001/123078073/123047167/novel.907/123149406/123096898/123141088	LOC123061001/LOC123078073/LOC123047167/-/LOC123149406/LOC123096898/LOC123141088	7	4	123047167/123149406/123096898/123141088	3	123061001/123078073/novel.907
MF	GO:0051020	GTPase binding	1/2465	75/32232	0.997456	1	123137901	LOC123137901	1	1	123137901	0
MF	GO:0003774	motor activity	5/2465	178/32232	0.998233	1	123061001/123078073/123149406/123096898/123141088	LOC123061001/LOC123078073/LOC123149406/LOC123096898/LOC123141088	5	3	123149406/123096898/123141088	2	123061001/123078073
MF	GO:0001883	purine nucleoside binding	20/2465	461/32232	0.998604	1	123160812/123168668/123061716/543361/123103302/123113912/123105601/123085949/123164695/123146615/123135719/123078765/123070313/123185380/123156833/123147963/123114151/123043778/123123647/123158940	LOC123160812/LOC123168668/LOC123061716/LOC543361/LOC123103302/LOC123113912/LOC123105601/LOC123085949/LOC123164695/LOC123146615/LOC123135719/LOC123078765/LOC123070313/LOC123185380/LOC123156833/LOC123147963/LOC123114151/LOC123043778/LOC123123647/LOC123158940	20	15	123160812/123168668/123061716/543361/123103302/123113912/123105601/123164695/123078765/123070313/123185380/123156833/123147963/123043778/123158940	5	123085949/123146615/123135719/123114151/123123647
MF	GO:0005525	GTP binding	20/2465	461/32232	0.998604	1	123160812/123168668/123061716/543361/123103302/123113912/123105601/123085949/123164695/123146615/123135719/123078765/123070313/123185380/123156833/123147963/123114151/123043778/123123647/123158940	LOC123160812/LOC123168668/LOC123061716/LOC543361/LOC123103302/LOC123113912/LOC123105601/LOC123085949/LOC123164695/LOC123146615/LOC123135719/LOC123078765/LOC123070313/LOC123185380/LOC123156833/LOC123147963/LOC123114151/LOC123043778/LOC123123647/LOC123158940	20	15	123160812/123168668/123061716/543361/123103302/123113912/123105601/123164695/123078765/123070313/123185380/123156833/123147963/123043778/123158940	5	123085949/123146615/123135719/123114151/123123647
MF	GO:0032549	ribonucleoside binding	20/2465	461/32232	0.998604	1	123160812/123168668/123061716/543361/123103302/123113912/123105601/123085949/123164695/123146615/123135719/123078765/123070313/123185380/123156833/123147963/123114151/123043778/123123647/123158940	LOC123160812/LOC123168668/LOC123061716/LOC543361/LOC123103302/LOC123113912/LOC123105601/LOC123085949/LOC123164695/LOC123146615/LOC123135719/LOC123078765/LOC123070313/LOC123185380/LOC123156833/LOC123147963/LOC123114151/LOC123043778/LOC123123647/LOC123158940	20	15	123160812/123168668/123061716/543361/123103302/123113912/123105601/123164695/123078765/123070313/123185380/123156833/123147963/123043778/123158940	5	123085949/123146615/123135719/123114151/123123647
MF	GO:0032550	purine ribonucleoside binding	20/2465	461/32232	0.998604	1	123160812/123168668/123061716/543361/123103302/123113912/123105601/123085949/123164695/123146615/123135719/123078765/123070313/123185380/123156833/123147963/123114151/123043778/123123647/123158940	LOC123160812/LOC123168668/LOC123061716/LOC543361/LOC123103302/LOC123113912/LOC123105601/LOC123085949/LOC123164695/LOC123146615/LOC123135719/LOC123078765/LOC123070313/LOC123185380/LOC123156833/LOC123147963/LOC123114151/LOC123043778/LOC123123647/LOC123158940	20	15	123160812/123168668/123061716/543361/123103302/123113912/123105601/123164695/123078765/123070313/123185380/123156833/123147963/123043778/123158940	5	123085949/123146615/123135719/123114151/123123647
MF	GO:0032561	guanyl ribonucleotide binding	20/2465	461/32232	0.998604	1	123160812/123168668/123061716/543361/123103302/123113912/123105601/123085949/123164695/123146615/123135719/123078765/123070313/123185380/123156833/123147963/123114151/123043778/123123647/123158940	LOC123160812/LOC123168668/LOC123061716/LOC543361/LOC123103302/LOC123113912/LOC123105601/LOC123085949/LOC123164695/LOC123146615/LOC123135719/LOC123078765/LOC123070313/LOC123185380/LOC123156833/LOC123147963/LOC123114151/LOC123043778/LOC123123647/LOC123158940	20	15	123160812/123168668/123061716/543361/123103302/123113912/123105601/123164695/123078765/123070313/123185380/123156833/123147963/123043778/123158940	5	123085949/123146615/123135719/123114151/123123647
MF	GO:0019899	enzyme binding	2/2465	117/32232	0.999044	1	123137901/123050156	LOC123137901/LOC123050156	2	1	123137901	1	123050156
MF	GO:0004386	helicase activity	2/2465	118/32232	0.999111	1	123149113/123136894	LOC123149113/LOC123136894	2	0		2	123149113/123136894
MF	GO:0001871	pattern binding	8/2465	252/32232	0.999121	1	123131816/123078931/123080375/123099233/123127740/123165612/123139458/123121986	LOC123131816/LOC123078931/LOC123080375/LOC123099233/LOC123127740/LOC123165612/LOC123139458/LOC123121986	8	4	123078931/123127740/123165612/123121986	4	123131816/123080375/123099233/123139458
MF	GO:0030247	polysaccharide binding	8/2465	252/32232	0.999121	1	123131816/123078931/123080375/123099233/123127740/123165612/123139458/123121986	LOC123131816/LOC123078931/LOC123080375/LOC123099233/LOC123127740/LOC123165612/LOC123139458/LOC123121986	8	4	123078931/123127740/123165612/123121986	4	123131816/123080375/123099233/123139458
MF	GO:0019001	guanyl nucleotide binding	20/2465	473/32232	0.999142	1	123160812/123168668/123061716/543361/123103302/123113912/123105601/123085949/123164695/123146615/123135719/123078765/123070313/123185380/123156833/123147963/123114151/123043778/123123647/123158940	LOC123160812/LOC123168668/LOC123061716/LOC543361/LOC123103302/LOC123113912/LOC123105601/LOC123085949/LOC123164695/LOC123146615/LOC123135719/LOC123078765/LOC123070313/LOC123185380/LOC123156833/LOC123147963/LOC123114151/LOC123043778/LOC123123647/LOC123158940	20	15	123160812/123168668/123061716/543361/123103302/123113912/123105601/123164695/123078765/123070313/123185380/123156833/123147963/123043778/123158940	5	123085949/123146615/123135719/123114151/123123647
MF	GO:0051082	unfolded protein binding	1/2465	95/32232	0.999484	1	100682521	LOC100682521	1	1	100682521	0
MF	GO:0016891	endoribonuclease activity, producing 5'-phosphomonoesters	1/2465	97/32232	0.99956	1	123165990	LOC123165990	1	1	123165990	0
MF	GO:0016893	endonuclease activity, active with either ribo- or deoxyribonucleic acids and producing 5'-phosphomonoesters	1/2465	97/32232	0.99956	1	123165990	LOC123165990	1	1	123165990	0
MF	GO:0140101	catalytic activity, acting on a tRNA	8/2465	266/32232	0.999589	1	123181686/123164622/123157170/123138434/123085031/123098306/123095949/123052821	LOC123181686/LOC123164622/LOC123157170/LOC123138434/LOC123085031/LOC123098306/LOC123095949/LOC123052821	8	3	123157170/123138434/123095949	5	123181686/123164622/123085031/123098306/123052821
MF	GO:0016779	nucleotidyltransferase activity	6/2465	256/32232	0.99994	1	123113276/123104987/123053576/123187027/123062734/123079889	LOC123113276/LOC123104987/LOC123053576/LOC123187027/LOC123062734/LOC123079889	6	5	123113276/123104987/123053576/123062734/123079889	1	123187027
MF	GO:0015078	proton transmembrane transporter activity	1/2465	127/32232	0.99996	1	100127077	LOC100127077	1	1	100127077	0
MF	GO:0034062	5'-3' RNA polymerase activity	1/2465	138/32232	0.999983	1	123053576	LOC123053576	1	1	123053576	0
MF	GO:0097747	RNA polymerase activity	1/2465	138/32232	0.999983	1	123053576	LOC123053576	1	1	123053576	0
MF	GO:0046982	protein heterodimerization activity	8/2465	406/32232	1	1	123142757/123181438/123059400/123062714/123182314/123182056/123079655/123136300	LOC123142757/LOC123181438/LOC123059400/LOC123062714/LOC123182314/LOC123182056/LOC123079655/LOC123136300	8	8	123142757/123181438/123059400/123062714/123182314/123182056/123079655/123136300	0

## Sheet: CWI78968_all_GOenrich
Table S3 Detailed information on GO enrichment and KEGG pathway annotations for differentially expressed genes (DEGs) in CWI44398, CWI78968, and CWI44183
Category	GOID	Description	GeneRatio	BgRatio	pvalue	padj	geneID	geneName	Count	Up	Up_Gene_id	Down	Down_Gene_id
BP	GO:0005976	polysaccharide metabolic process	47/1380	195/19183	1.01258e-13	5.48818e-11	123068318/123148738/123185146/123044614/123188374/543318/123049142/123164299/123148736/123162722/123168533/123044617/123148743/123153374/123126270/123128167/123148737/123046969/123044576/123052445/123167634/123166841/123188320/123158862/123044578/123052444/123069878/123158976/123162724/123121827/123181646/123160297/543329/123175951/123148734/123044580/123078310/123052443/123119280/123052101/12316…	LOC123068318/LOC123148738/LOC123185146/LOC123044614/LOC123188374/LOC543318/LOC123049142/LOC123164299/LOC123148736/LOC123162722/LOC123168533/LOC123044617/LOC123148743/LOC123153374/LOC123126270/LOC123128167/LOC123148737/LOC123046969/LOC123044576/LOC123052445/LOC123167634/LOC123166841/LOC123188320/LOC123158862/LOC123044578/LOC123052444/LOC123069878/LOC123158976/LOC123162724/LOC123121827/LOC123181646…	47	42	123148738/123185146/123044614/543318/123049142/123164299/123148736/123162722/123168533/123148743/123153374/123126270/123128167/123148737/123046969/123044576/123052445/123167634/123166841/123188320/123158862/123044578/123052444/123069878/123158976/123162724/123181646/123160297/123175951/123148734/123044580/123078310/123052443/123119280/123052101/123164298/543464/123158975/123188324/123044579/12314…	5	123068318/123188374/123044617/123121827/543329
BP	GO:0009415	response to water	18/1380	36/19183	6.22561e-12	1.68714e-09	123138923/123145845/123145848/542792/123128719/123117116/123141981/543293/543296/123145843/123125681/123138922/100141381/100037562/123145839/123080042/123138921/123138917	LOC123138923/LOC123145845/LOC123145848/LOC542792/LOC123128719/LOC123117116/LOC123141981/LOC543293/LOC543296/LOC123145843/LOC123125681/LOC123138922/LOC100141381/LOC100037562/LOC123145839/LOC123080042/LOC123138921/LOC123138917	18	18	123138923/123145845/123145848/542792/123128719/123117116/123141981/543293/543296/123145843/123125681/123138922/100141381/100037562/123145839/123080042/123138921/123138917	0
BP	GO:0044042	glucan metabolic process	39/1380	172/19183	9.22966e-11	1.0005e-08	123068318/123148738/123185146/123049142/123164299/123148736/123162722/123168533/123148743/123153374/123126270/123148737/123046969/123044576/123052445/123167634/123166841/123188320/123158862/123044578/123052444/123069878/123158976/123162724/123121827/123160297/123175951/123148734/123044580/123078310/123052443/123119280/123164298/543464/123158975/123188324/123044579/123148727/606355	LOC123068318/LOC123148738/LOC123185146/LOC123049142/LOC123164299/LOC123148736/LOC123162722/LOC123168533/LOC123148743/LOC123153374/LOC123126270/LOC123148737/LOC123046969/LOC123044576/LOC123052445/LOC123167634/LOC123166841/LOC123188320/LOC123158862/LOC123044578/LOC123052444/LOC123069878/LOC123158976/LOC123162724/LOC123121827/LOC123160297/LOC123175951/LOC123148734/LOC123044580/LOC123078310/LOC123052…	39	37	123148738/123185146/123049142/123164299/123148736/123162722/123168533/123148743/123153374/123126270/123148737/123046969/123044576/123052445/123167634/123166841/123188320/123158862/123044578/123052444/123069878/123158976/123162724/123160297/123175951/123148734/123044580/123078310/123052443/123119280/123164298/543464/123158975/123188324/123044579/123148727/606355	2	123068318/123121827
BP	GO:0001101	response to acid chemical	18/1380	43/19183	2.5666e-10	1.98728e-08	123138923/123145845/123145848/542792/123128719/123117116/123141981/543293/543296/123145843/123125681/123138922/100141381/100037562/123145839/123080042/123138921/123138917	LOC123138923/LOC123145845/LOC123145848/LOC542792/LOC123128719/LOC123117116/LOC123141981/LOC543293/LOC543296/LOC123145843/LOC123125681/LOC123138922/LOC100141381/LOC100037562/LOC123145839/LOC123080042/LOC123138921/LOC123138917	18	18	123138923/123145845/123145848/542792/123128719/123117116/123141981/543293/543296/123145843/123125681/123138922/100141381/100037562/123145839/123080042/123138921/123138917	0
BP	GO:1901700	response to oxygen-containing compound	18/1380	43/19183	2.5666e-10	1.98728e-08	123138923/123145845/123145848/542792/123128719/123117116/123141981/543293/543296/123145843/123125681/123138922/100141381/100037562/123145839/123080042/123138921/123138917	LOC123138923/LOC123145845/LOC123145848/LOC542792/LOC123128719/LOC123117116/LOC123141981/LOC543293/LOC543296/LOC123145843/LOC123125681/LOC123138922/LOC100141381/LOC100037562/LOC123145839/LOC123080042/LOC123138921/LOC123138917	18	18	123138923/123145845/123145848/542792/123128719/123117116/123141981/543293/543296/123145843/123125681/123138922/100141381/100037562/123145839/123080042/123138921/123138917	0
BP	GO:0044262	cellular carbohydrate metabolic process	49/1380	265/19183	8.08286e-10	5.47614e-08	123068318/123148738/123092190/123185146/123085854/123097521/123049142/123164299/123148736/100270668/123162722/123168533/123187938/123063345/123148743/123153374/123126270/123098428/123148737/123046969/123044576/123052445/123167634/123166841/123188320/123158862/123044578/123052444/123069878/123158976/123162724/123121827/123160297/123175951/542972/123148734/123044580/123078310/123052443/123119280/12…	LOC123068318/LOC123148738/LOC123092190/LOC123185146/LOC123085854/LOC123097521/LOC123049142/LOC123164299/LOC123148736/LOC100270668/LOC123162722/LOC123168533/LOC123187938/LOC123063345/LOC123148743/LOC123153374/LOC123126270/LOC123098428/LOC123148737/LOC123046969/LOC123044576/LOC123052445/LOC123167634/LOC123166841/LOC123188320/LOC123158862/LOC123044578/LOC123052444/LOC123069878/LOC123158976/LOC123162…	49	44	123148738/123092190/123185146/123085854/123097521/123049142/123164299/123148736/123162722/123168533/123187938/123148743/123153374/123126270/123148737/123046969/123044576/123052445/123167634/123166841/123188320/123158862/123044578/123052444/123069878/123158976/123162724/123160297/123175951/542972/123148734/123044580/123078310/123052443/123119280/123164298/123046325/543464/123158975/123188324/12304…	5	123068318/100270668/123063345/123098428/123121827
BP	GO:0009628	response to abiotic stimulus	18/1380	50/19183	4.68725e-09	2.54049e-07	123138923/123145845/123145848/542792/123128719/123117116/123141981/543293/543296/123145843/123125681/123138922/100141381/100037562/123145839/123080042/123138921/123138917	LOC123138923/LOC123145845/LOC123145848/LOC542792/LOC123128719/LOC123117116/LOC123141981/LOC543293/LOC543296/LOC123145843/LOC123125681/LOC123138922/LOC100141381/LOC100037562/LOC123145839/LOC123080042/LOC123138921/LOC123138917	18	18	123138923/123145845/123145848/542792/123128719/123117116/123141981/543293/543296/123145843/123125681/123138922/100141381/100037562/123145839/123080042/123138921/123138917	0
BP	GO:0010035	response to inorganic substance	18/1380	50/19183	4.68725e-09	2.54049e-07	123138923/123145845/123145848/542792/123128719/123117116/123141981/543293/543296/123145843/123125681/123138922/100141381/100037562/123145839/123080042/123138921/123138917	LOC123138923/LOC123145845/LOC123145848/LOC542792/LOC123128719/LOC123117116/LOC123141981/LOC543293/LOC543296/LOC123145843/LOC123125681/LOC123138922/LOC100141381/LOC100037562/LOC123145839/LOC123080042/LOC123138921/LOC123138917	18	18	123138923/123145845/123145848/542792/123128719/123117116/123141981/543293/543296/123145843/123125681/123138922/100141381/100037562/123145839/123080042/123138921/123138917	0
BP	GO:0010817	regulation of hormone levels	12/1380	26/19183	6.85297e-08	3.09526e-06	123149681/123128593/123046279/123145716/123053593/123130341/123046080/123138464/101290606/123181824/123062219/123121802	LOC123149681/LOC123128593/LOC123046279/LOC123145716/LOC123053593/LOC123130341/LOC123046080/LOC123138464/LOC101290606/LOC123181824/LOC123062219/LOC123121802	12	4	123128593/123145716/123138464/123062219	8	123149681/123046279/123053593/123130341/123046080/101290606/123181824/123121802
BP	GO:0042445	hormone metabolic process	12/1380	26/19183	6.85297e-08	3.09526e-06	123149681/123128593/123046279/123145716/123053593/123130341/123046080/123138464/101290606/123181824/123062219/123121802	LOC123149681/LOC123128593/LOC123046279/LOC123145716/LOC123053593/LOC123130341/LOC123046080/LOC123138464/LOC101290606/LOC123181824/LOC123062219/LOC123121802	12	4	123128593/123145716/123138464/123062219	8	123149681/123046279/123053593/123130341/123046080/101290606/123181824/123121802
BP	GO:0008610	lipid biosynthetic process	47/1380	328/19183	4.5439e-06	0.000189446	123181004/123098215/123120849/100270666/123168027/123096278/123091300/123079301/123085176/123085149/123105435/123098077/123159599/123181005/123167910/123155757/123180032/123148128/123084705/123068212/123165924/123046235/123108286/123098428/123070918/123121592/123163916/123139638/123181575/123045141/123099318/123146095/123143431/123078902/123131911/123069734/123183009/100192181/123152737/123093211…	LOC123181004/LOC123098215/LOC123120849/LOC100270666/LOC123168027/LOC123096278/LOC123091300/LOC123079301/LOC123085176/LOC123085149/LOC123105435/LOC123098077/LOC123159599/LOC123181005/LOC123167910/LOC123155757/LOC123180032/LOC123148128/LOC123084705/LOC123068212/LOC123165924/LOC123046235/LOC123108286/LOC123098428/LOC123070918/LOC123121592/LOC123163916/LOC123139638/LOC123181575/LOC123045141/LOC123099…	47	37	123181004/123098215/123120849/100270666/123168027/123096278/123091300/123079301/123085176/123085149/123098077/123159599/123181005/123155757/123148128/123084705/123165924/123108286/123070918/123121592/123163916/123139638/123181575/123045141/123099318/123146095/123143431/123078902/123183009/100192181/123093211/123086141/123065590/123127385/123120828/123093812/123045147	10	123105435/123167910/123180032/123068212/123046235/123098428/123131911/123069734/123152737/123054106
BP	GO:0072330	monocarboxylic acid biosynthetic process	34/1380	208/19183	5.54955e-06	0.000214847	123098215/100270666/123168027/123120509/123085176/606323/123085149/123105435/123098077/123167910/123128593/123127923/123103220/123180032/123148128/123084705/123095662/123060166/123145716/123139638/123138464/123189489/123099318/123146095/123143431/123090631/123053591/123070270/123181626/123167365/123093211/123086141/123069319/123045718	LOC123098215/LOC100270666/LOC123168027/LOC123120509/LOC123085176/LOC606323/LOC123085149/LOC123105435/LOC123098077/LOC123167910/LOC123128593/LOC123127923/LOC123103220/LOC123180032/LOC123148128/LOC123084705/LOC123095662/LOC123060166/LOC123145716/LOC123139638/LOC123138464/LOC123189489/LOC123099318/LOC123146095/LOC123143431/LOC123090631/LOC123053591/LOC123070270/LOC123181626/LOC123167365/LOC123093211…	34	26	123098215/100270666/123168027/123120509/123085176/606323/123085149/123098077/123128593/123103220/123148128/123084705/123060166/123145716/123139638/123138464/123189489/123099318/123146095/123143431/123053591/123070270/123093211/123086141/123069319/123045718	8	123105435/123167910/123127923/123180032/123095662/123090631/123181626/123167365
BP	GO:0009690	cytokinin metabolic process	9/1380	23/19183	1.62877e-05	0.000551745	123149681/123046279/123053593/123130341/123046080/101290606/123181824/123062219/123121802	LOC123149681/LOC123046279/LOC123053593/LOC123130341/LOC123046080/LOC101290606/LOC123181824/LOC123062219/LOC123121802	9	1	123062219	8	123149681/123046279/123053593/123130341/123046080/101290606/123181824/123121802
BP	GO:0034754	cellular hormone metabolic process	9/1380	23/19183	1.62877e-05	0.000551745	123149681/123046279/123053593/123130341/123046080/101290606/123181824/123062219/123121802	LOC123149681/LOC123046279/LOC123053593/LOC123130341/LOC123046080/LOC101290606/LOC123181824/LOC123062219/LOC123121802	9	1	123062219	8	123149681/123046279/123053593/123130341/123046080/101290606/123181824/123121802
BP	GO:0032787	monocarboxylic acid metabolic process	37/1380	258/19183	4.46365e-05	0.00142312	123098215/100270666/123168027/123120509/123085176/606323/123085149/123105435/123098077/123167910/123128593/123127923/123103220/123180032/123148128/123084705/123095662/123060166/123145716/123102951/123088641/123139638/123138464/123189489/123099318/123146095/123143431/123090631/123062298/123053591/123070270/123181626/123167365/123093211/123086141/123069319/123045718	LOC123098215/LOC100270666/LOC123168027/LOC123120509/LOC123085176/LOC606323/LOC123085149/LOC123105435/LOC123098077/LOC123167910/LOC123128593/LOC123127923/LOC123103220/LOC123180032/LOC123148128/LOC123084705/LOC123095662/LOC123060166/LOC123145716/LOC123102951/LOC123088641/LOC123139638/LOC123138464/LOC123189489/LOC123099318/LOC123146095/LOC123143431/LOC123090631/LOC123062298/LOC123053591/LOC123070270…	37	28	123098215/100270666/123168027/123120509/123085176/606323/123085149/123098077/123128593/123103220/123148128/123084705/123060166/123145716/123088641/123139638/123138464/123189489/123099318/123146095/123143431/123062298/123053591/123070270/123093211/123086141/123069319/123045718	9	123105435/123167910/123127923/123180032/123095662/123102951/123090631/123181626/123167365
BP	GO:0006633	fatty acid biosynthetic process	17/1380	81/19183	5.22424e-05	0.00157308	123098215/100270666/123168027/123085176/123085149/123105435/123098077/123167910/123180032/123148128/123084705/123139638/123099318/123146095/123143431/123093211/123086141	LOC123098215/LOC100270666/LOC123168027/LOC123085176/LOC123085149/LOC123105435/LOC123098077/LOC123167910/LOC123180032/LOC123148128/LOC123084705/LOC123139638/LOC123099318/LOC123146095/LOC123143431/LOC123093211/LOC123086141	17	14	123098215/100270666/123168027/123085176/123085149/123098077/123148128/123084705/123139638/123099318/123146095/123143431/123093211/123086141	3	123105435/123167910/123180032
BP	GO:0006820	anion transport	24/1380	146/19183	0.000115819	0.00330389	123045549/123053389/543388/123163773/123150021/123143623/123189297/123113787/123070428/100415856/123098026/123070775/123124242/123100061/123079164/123143624/123099272/123090827/123094929/123189645/123092732/123164301/123087984/123150081	LOC123045549/LOC123053389/LOC543388/LOC123163773/LOC123150021/LOC123143623/LOC123189297/LOC123113787/LOC123070428/LOC100415856/LOC123098026/LOC123070775/LOC123124242/LOC123100061/LOC123079164/LOC123143624/LOC123099272/LOC123090827/LOC123094929/LOC123189645/LOC123092732/LOC123164301/LOC123087984/LOC123150081	24	11	123045549/123053389/543388/123189297/123070775/123124242/123100061/123079164/123099272/123087984/123150081	13	123163773/123150021/123143623/123113787/123070428/100415856/123098026/123143624/123090827/123094929/123189645/123092732/123164301
BP	GO:0000272	polysaccharide catabolic process	8/1380	23/19183	0.000129571	0.00351137	123044614/123188374/543318/123044617/123128167/123181646/543329/123052101	LOC123044614/LOC123188374/LOC543318/LOC123044617/LOC123128167/LOC123181646/LOC543329/LOC123052101	8	5	123044614/543318/123128167/123181646/123052101	3	123188374/123044617/543329
BP	GO:0009767	photosynthetic electron transport chain	8/1380	26/19183	0.000339948	0.00871305	123097283/123067330/123097282/123056109/novel.2337/123123282/123181322/123191445	LOC123097283/LOC123067330/LOC123097282/LOC123056109/-/LOC123123282/LOC123181322/LOC123191445	8	0		8	123097283/123067330/123097282/123056109/novel.2337/123123282/123181322/123191445
BP	GO:0030243	cellulose metabolic process	14/1380	71/19183	0.000461873	0.00871305	123068318/123185146/123049142/123044576/123052445/123188320/123044578/123052444/123121827/123160297/123044580/123052443/123188324/123044579	LOC123068318/LOC123185146/LOC123049142/LOC123044576/LOC123052445/LOC123188320/LOC123044578/LOC123052444/LOC123121827/LOC123160297/LOC123044580/LOC123052443/LOC123188324/LOC123044579	14	12	123185146/123049142/123044576/123052445/123188320/123044578/123052444/123160297/123044580/123052443/123188324/123044579	2	123068318/123121827
BP	GO:0030244	cellulose biosynthetic process	14/1380	71/19183	0.000461873	0.00871305	123068318/123185146/123049142/123044576/123052445/123188320/123044578/123052444/123121827/123160297/123044580/123052443/123188324/123044579	LOC123068318/LOC123185146/LOC123049142/LOC123044576/LOC123052445/LOC123188320/LOC123044578/LOC123052444/LOC123121827/LOC123160297/LOC123044580/LOC123052443/LOC123188324/LOC123044579	14	12	123185146/123049142/123044576/123052445/123188320/123044578/123052444/123160297/123044580/123052443/123188324/123044579	2	123068318/123121827
BP	GO:0006631	fatty acid metabolic process	20/1380	125/19183	0.000594635	0.00871305	123098215/100270666/123168027/123085176/123085149/123105435/123098077/123167910/123180032/123148128/123084705/123102951/123088641/123139638/123099318/123146095/123143431/123062298/123093211/123086141	LOC123098215/LOC100270666/LOC123168027/LOC123085176/LOC123085149/LOC123105435/LOC123098077/LOC123167910/LOC123180032/LOC123148128/LOC123084705/LOC123102951/LOC123088641/LOC123139638/LOC123099318/LOC123146095/LOC123143431/LOC123062298/LOC123093211/LOC123086141	20	16	123098215/100270666/123168027/123085176/123085149/123098077/123148128/123084705/123088641/123139638/123099318/123146095/123143431/123062298/123093211/123086141	4	123105435/123167910/123180032/123102951
BP	GO:0002376	immune system process	5/1380	11/19183	0.00061199	0.00871305	123169410/123092354/123068354/101669865/123169411	LOC123169410/LOC123092354/LOC123068354/LOC101669865/LOC123169411	5	5	123169410/123092354/123068354/101669865/123169411	0
BP	GO:0002682	regulation of immune system process	5/1380	11/19183	0.00061199	0.00871305	123169410/123092354/123068354/101669865/123169411	LOC123169410/LOC123092354/LOC123068354/LOC101669865/LOC123169411	5	5	123169410/123092354/123068354/101669865/123169411	0
BP	GO:0002831	regulation of response to biotic stimulus	5/1380	11/19183	0.00061199	0.00871305	123169410/123092354/123068354/101669865/123169411	LOC123169410/LOC123092354/LOC123068354/LOC101669865/LOC123169411	5	5	123169410/123092354/123068354/101669865/123169411	0
BP	GO:0006955	immune response	5/1380	11/19183	0.00061199	0.00871305	123169410/123092354/123068354/101669865/123169411	LOC123169410/LOC123092354/LOC123068354/LOC101669865/LOC123169411	5	5	123169410/123092354/123068354/101669865/123169411	0
BP	GO:0009627	systemic acquired resistance	5/1380	11/19183	0.00061199	0.00871305	123169410/123092354/123068354/101669865/123169411	LOC123169410/LOC123092354/LOC123068354/LOC101669865/LOC123169411	5	5	123169410/123092354/123068354/101669865/123169411	0
BP	GO:0009814	defense response, incompatible interaction	5/1380	11/19183	0.00061199	0.00871305	123169410/123092354/123068354/101669865/123169411	LOC123169410/LOC123092354/LOC123068354/LOC101669865/LOC123169411	5	5	123169410/123092354/123068354/101669865/123169411	0
BP	GO:0010112	regulation of systemic acquired resistance	5/1380	11/19183	0.00061199	0.00871305	123169410/123092354/123068354/101669865/123169411	LOC123169410/LOC123092354/LOC123068354/LOC101669865/LOC123169411	5	5	123169410/123092354/123068354/101669865/123169411	0
BP	GO:0031347	regulation of defense response	5/1380	11/19183	0.00061199	0.00871305	123169410/123092354/123068354/101669865/123169411	LOC123169410/LOC123092354/LOC123068354/LOC101669865/LOC123169411	5	5	123169410/123092354/123068354/101669865/123169411	0
BP	GO:0032101	regulation of response to external stimulus	5/1380	11/19183	0.00061199	0.00871305	123169410/123092354/123068354/101669865/123169411	LOC123169410/LOC123092354/LOC123068354/LOC101669865/LOC123169411	5	5	123169410/123092354/123068354/101669865/123169411	0
BP	GO:0043900	regulation of multi-organism process	5/1380	11/19183	0.00061199	0.00871305	123169410/123092354/123068354/101669865/123169411	LOC123169410/LOC123092354/LOC123068354/LOC101669865/LOC123169411	5	5	123169410/123092354/123068354/101669865/123169411	0
BP	GO:0045087	innate immune response	5/1380	11/19183	0.00061199	0.00871305	123169410/123092354/123068354/101669865/123169411	LOC123169410/LOC123092354/LOC123068354/LOC101669865/LOC123169411	5	5	123169410/123092354/123068354/101669865/123169411	0
BP	GO:0045088	regulation of innate immune response	5/1380	11/19183	0.00061199	0.00871305	123169410/123092354/123068354/101669865/123169411	LOC123169410/LOC123092354/LOC123068354/LOC101669865/LOC123169411	5	5	123169410/123092354/123068354/101669865/123169411	0
BP	GO:0050776	regulation of immune response	5/1380	11/19183	0.00061199	0.00871305	123169410/123092354/123068354/101669865/123169411	LOC123169410/LOC123092354/LOC123068354/LOC101669865/LOC123169411	5	5	123169410/123092354/123068354/101669865/123169411	0
BP	GO:0016053	organic acid biosynthetic process	44/1380	368/19183	0.000626954	0.00871305	123098215/100270666/123168027/123120509/123085176/606323/123085149/123105435/123098077/123111229/123167910/123128593/123127923/123103220/123180032/123148128/123084705/123093127/123095662/123060166/123145716/123098400/123049559/123094885/123122682/123044668/123113163/123139638/123138464/123189489/123099318/123084953/123146095/123143431/123090631/123053591/123070270/123181626/123167365/123093211/12…	LOC123098215/LOC100270666/LOC123168027/LOC123120509/LOC123085176/LOC606323/LOC123085149/LOC123105435/LOC123098077/LOC123111229/LOC123167910/LOC123128593/LOC123127923/LOC123103220/LOC123180032/LOC123148128/LOC123084705/LOC123093127/LOC123095662/LOC123060166/LOC123145716/LOC123098400/LOC123049559/LOC123094885/LOC123122682/LOC123044668/LOC123113163/LOC123139638/LOC123138464/LOC123189489/LOC123099318…	44	32	123098215/100270666/123168027/123120509/123085176/606323/123085149/123098077/123111229/123128593/123103220/123148128/123084705/123060166/123145716/123094885/123122682/123044668/123113163/123139638/123138464/123189489/123099318/123146095/123143431/123053591/123070270/123093211/123041365/123086141/123069319/123045718	12	123105435/123167910/123127923/123180032/123093127/123095662/123098400/123049559/123084953/123090631/123181626/123167365
BP	GO:0046394	carboxylic acid biosynthetic process	44/1380	368/19183	0.000626954	0.00871305	123098215/100270666/123168027/123120509/123085176/606323/123085149/123105435/123098077/123111229/123167910/123128593/123127923/123103220/123180032/123148128/123084705/123093127/123095662/123060166/123145716/123098400/123049559/123094885/123122682/123044668/123113163/123139638/123138464/123189489/123099318/123084953/123146095/123143431/123090631/123053591/123070270/123181626/123167365/123093211/12…	LOC123098215/LOC100270666/LOC123168027/LOC123120509/LOC123085176/LOC606323/LOC123085149/LOC123105435/LOC123098077/LOC123111229/LOC123167910/LOC123128593/LOC123127923/LOC123103220/LOC123180032/LOC123148128/LOC123084705/LOC123093127/LOC123095662/LOC123060166/LOC123145716/LOC123098400/LOC123049559/LOC123094885/LOC123122682/LOC123044668/LOC123113163/LOC123139638/LOC123138464/LOC123189489/LOC123099318…	44	32	123098215/100270666/123168027/123120509/123085176/606323/123085149/123098077/123111229/123128593/123103220/123148128/123084705/123060166/123145716/123094885/123122682/123044668/123113163/123139638/123138464/123189489/123099318/123146095/123143431/123053591/123070270/123093211/123041365/123086141/123069319/123045718	12	123105435/123167910/123127923/123180032/123093127/123095662/123098400/123049559/123084953/123090631/123181626/123167365
BP	GO:0000271	polysaccharide biosynthetic process	17/1380	100/19183	0.000739697	0.00911172	123068318/123185146/123049142/123046969/123044576/123052445/123188320/123044578/123052444/123069878/123121827/123160297/123044580/123078310/123052443/123188324/123044579	LOC123068318/LOC123185146/LOC123049142/LOC123046969/LOC123044576/LOC123052445/LOC123188320/LOC123044578/LOC123052444/LOC123069878/LOC123121827/LOC123160297/LOC123044580/LOC123078310/LOC123052443/LOC123188324/LOC123044579	17	15	123185146/123049142/123046969/123044576/123052445/123188320/123044578/123052444/123069878/123160297/123044580/123078310/123052443/123188324/123044579	2	123068318/123121827
BP	GO:0009250	glucan biosynthetic process	17/1380	100/19183	0.000739697	0.00911172	123068318/123185146/123049142/123046969/123044576/123052445/123188320/123044578/123052444/123069878/123121827/123160297/123044580/123078310/123052443/123188324/123044579	LOC123068318/LOC123185146/LOC123049142/LOC123046969/LOC123044576/LOC123052445/LOC123188320/LOC123044578/LOC123052444/LOC123069878/LOC123121827/LOC123160297/LOC123044580/LOC123078310/LOC123052443/LOC123188324/LOC123044579	17	15	123185146/123049142/123046969/123044576/123052445/123188320/123044578/123052444/123069878/123160297/123044580/123078310/123052443/123188324/123044579	2	123068318/123121827
BP	GO:0033692	cellular polysaccharide biosynthetic process	17/1380	100/19183	0.000739697	0.00911172	123068318/123185146/123049142/123046969/123044576/123052445/123188320/123044578/123052444/123069878/123121827/123160297/123044580/123078310/123052443/123188324/123044579	LOC123068318/LOC123185146/LOC123049142/LOC123046969/LOC123044576/LOC123052445/LOC123188320/LOC123044578/LOC123052444/LOC123069878/LOC123121827/LOC123160297/LOC123044580/LOC123078310/LOC123052443/LOC123188324/LOC123044579	17	15	123185146/123049142/123046969/123044576/123052445/123188320/123044578/123052444/123069878/123160297/123044580/123078310/123052443/123188324/123044579	2	123068318/123121827
BP	GO:0051273	beta-glucan metabolic process	17/1380	100/19183	0.000739697	0.00911172	123068318/123185146/123049142/123046969/123044576/123052445/123188320/123044578/123052444/123069878/123121827/123160297/123044580/123078310/123052443/123188324/123044579	LOC123068318/LOC123185146/LOC123049142/LOC123046969/LOC123044576/LOC123052445/LOC123188320/LOC123044578/LOC123052444/LOC123069878/LOC123121827/LOC123160297/LOC123044580/LOC123078310/LOC123052443/LOC123188324/LOC123044579	17	15	123185146/123049142/123046969/123044576/123052445/123188320/123044578/123052444/123069878/123160297/123044580/123078310/123052443/123188324/123044579	2	123068318/123121827
BP	GO:0051274	beta-glucan biosynthetic process	17/1380	100/19183	0.000739697	0.00911172	123068318/123185146/123049142/123046969/123044576/123052445/123188320/123044578/123052444/123069878/123121827/123160297/123044580/123078310/123052443/123188324/123044579	LOC123068318/LOC123185146/LOC123049142/LOC123046969/LOC123044576/LOC123052445/LOC123188320/LOC123044578/LOC123052444/LOC123069878/LOC123121827/LOC123160297/LOC123044580/LOC123078310/LOC123052443/LOC123188324/LOC123044579	17	15	123185146/123049142/123046969/123044576/123052445/123188320/123044578/123052444/123069878/123160297/123044580/123078310/123052443/123188324/123044579	2	123068318/123121827
BP	GO:0015698	inorganic anion transport	15/1380	83/19183	0.000773816	0.00932018	123045549/123053389/123143623/123189297/123113787/123070428/100415856/123070775/123124242/123079164/123143624/123099272/123164301/123087984/123150081	LOC123045549/LOC123053389/LOC123143623/LOC123189297/LOC123113787/LOC123070428/LOC100415856/LOC123070775/LOC123124242/LOC123079164/LOC123143624/LOC123099272/LOC123164301/LOC123087984/LOC123150081	15	9	123045549/123053389/123189297/123070775/123124242/123079164/123099272/123087984/123150081	6	123143623/123113787/123070428/100415856/123143624/123164301
BP	GO:0044283	small molecule biosynthetic process	51/1380	449/19183	0.000802868	0.00945988	123092719/123098016/123085323/123098215/100270666/123168027/123120509/123085176/606323/123085149/123105435/123098077/123111229/123167910/123128593/123127923/123103220/123106148/123180032/123148128/123084705/123093127/123095662/123060166/123145716/123098400/123049559/123094885/123087299/123122682/123044668/123098428/123113163/123139638/123138464/123189489/123099318/123084953/123146095/123099184/12…	LOC123092719/LOC123098016/LOC123085323/LOC123098215/LOC100270666/LOC123168027/LOC123120509/LOC123085176/LOC606323/LOC123085149/LOC123105435/LOC123098077/LOC123111229/LOC123167910/LOC123128593/LOC123127923/LOC123103220/LOC123106148/LOC123180032/LOC123148128/LOC123084705/LOC123093127/LOC123095662/LOC123060166/LOC123145716/LOC123098400/LOC123049559/LOC123094885/LOC123087299/LOC123122682/LOC123044668…	51	35	123092719/123098016/123085323/123098215/100270666/123168027/123120509/123085176/606323/123085149/123098077/123111229/123128593/123103220/123148128/123084705/123060166/123145716/123094885/123122682/123044668/123113163/123139638/123138464/123189489/123099318/123146095/123143431/123053591/123070270/123093211/123041365/123086141/123069319/123045718	16	123105435/123167910/123127923/123106148/123180032/123093127/123095662/123098400/123049559/123087299/123098428/123084953/123099184/123090631/123181626/123167365
BP	GO:0015979	photosynthesis	23/1380	157/19183	0.000862829	0.00980414	123043755/123097283/123067330/123099920/123096002/123079341/123070959/123144890/123171048/123165132/123097282/123080462/123187550/123090986/123090987/123127700/123189863/123056109/123046085/novel.2337/123123282/123181322/123191445	LOC123043755/LOC123097283/LOC123067330/LOC123099920/LOC123096002/LOC123079341/LOC123070959/LOC123144890/LOC123171048/LOC123165132/LOC123097282/LOC123080462/LOC123187550/LOC123090986/LOC123090987/LOC123127700/LOC123189863/LOC123056109/LOC123046085/-/LOC123123282/LOC123181322/LOC123191445	23	5	123144890/123080462/123127700/123189863/123046085	18	123043755/123097283/123067330/123099920/123096002/123079341/123070959/123171048/123165132/123097282/123187550/123090986/123090987/123056109/novel.2337/123123282/123181322/123191445
BP	GO:0030001	metal ion transport	43/1380	363/19183	0.000868263	0.00980414	123166012/123121414/123151620/123054217/123130089/123190109/123110243/123116182/123121908/123187211/123065334/123106155/123158021/123100582/123150115/123043382/123156406/123119287/123063255/123182620/123132104/123167175/123166399/123091680/123072820/123159986/123093169/123046369/123136806/123048217/123058504/123113968/123099244/123086605/123186476/123165366/123082149/123080442/123059913/123160732…	LOC123166012/LOC123121414/LOC123151620/LOC123054217/LOC123130089/LOC123190109/LOC123110243/LOC123116182/LOC123121908/LOC123187211/LOC123065334/LOC123106155/LOC123158021/LOC123100582/LOC123150115/LOC123043382/LOC123156406/LOC123119287/LOC123063255/LOC123182620/LOC123132104/LOC123167175/LOC123166399/LOC123091680/LOC123072820/LOC123159986/LOC123093169/LOC123046369/LOC123136806/LOC123048217/LOC123058…	43	27	123121414/123130089/123116182/123121908/123187211/123065334/123158021/123100582/123150115/123043382/123063255/123182620/123132104/123167175/123166399/123091680/123072820/123159986/123093169/123048217/123099244/123086605/123186476/123080442/123121696/123111203/123141760	16	123166012/123151620/123054217/123190109/123110243/123106155/123156406/123119287/123046369/123136806/123058504/123113968/123165366/123082149/123059913/123160732
BP	GO:0042221	response to chemical	46/1380	401/19183	0.00115307	0.0122477	123138923/123145845/123072603/123145848/123048633/542792/123128719/123124832/123128714/123117116/123141981/123181304/123045265/123091631/123137373/123182400/543293/543296/123145843/123097997/123125681/123138922/100141381/123067098/123165308/123073943/100037562/123107065/123092880/123158179/123145839/123157508/123131051/123130722/123093441/123119425/123080042/123116189/123138921/123123915/12314187…	LOC123138923/LOC123145845/LOC123072603/LOC123145848/LOC123048633/LOC542792/LOC123128719/LOC123124832/LOC123128714/LOC123117116/LOC123141981/LOC123181304/LOC123045265/LOC123091631/LOC123137373/LOC123182400/LOC543293/LOC543296/LOC123145843/LOC123097997/LOC123125681/LOC123138922/LOC100141381/LOC123067098/LOC123165308/LOC123073943/LOC100037562/LOC123107065/LOC123092880/LOC123158179/LOC123145839/LOC12…	46	36	123138923/123145845/123072603/123145848/542792/123128719/123128714/123117116/123141981/123045265/123091631/123137373/123182400/543293/543296/123145843/123097997/123125681/123138922/100141381/123067098/123165308/100037562/123107065/123158179/123145839/123157508/123130722/123093441/123119425/123080042/123116189/123138921/123101504/123138917/123103118	10	123048633/123124832/123181304/123073943/123092880/123131051/123123915/123141879/123049095/123051820
BP	GO:0006099	tricarboxylic acid cycle	6/1380	18/19183	0.00119766	0.0122477	123060630/123164058/123077770/123156484/123147894/123069256	LOC123060630/LOC123164058/LOC123077770/LOC123156484/LOC123147894/LOC123069256	6	0		6	123060630/123164058/123077770/123156484/123147894/123069256
BP	GO:0006101	citrate metabolic process	6/1380	18/19183	0.00119766	0.0122477	123060630/123164058/123077770/123156484/123147894/123069256	LOC123060630/LOC123164058/LOC123077770/LOC123156484/LOC123147894/LOC123069256	6	0		6	123060630/123164058/123077770/123156484/123147894/123069256
BP	GO:0009060	aerobic respiration	6/1380	18/19183	0.00119766	0.0122477	123060630/123164058/123077770/123156484/123147894/123069256	LOC123060630/LOC123164058/LOC123077770/LOC123156484/LOC123147894/LOC123069256	6	0		6	123060630/123164058/123077770/123156484/123147894/123069256
BP	GO:0016999	antibiotic metabolic process	6/1380	18/19183	0.00119766	0.0122477	123060630/123164058/123077770/123156484/123147894/123069256	LOC123060630/LOC123164058/LOC123077770/LOC123156484/LOC123147894/LOC123069256	6	0		6	123060630/123164058/123077770/123156484/123147894/123069256
BP	GO:0080134	regulation of response to stress	5/1380	14/19183	0.00220988	0.0221806	123169410/123092354/123068354/101669865/123169411	LOC123169410/LOC123092354/LOC123068354/LOC101669865/LOC123169411	5	5	123169410/123092354/123068354/101669865/123169411	0
BP	GO:0015977	carbon fixation	6/1380	21/19183	0.00290517	0.0286292	123060630/123164058/123077770/123156484/123147894/123069256	LOC123060630/LOC123164058/LOC123077770/LOC123156484/LOC123147894/LOC123069256	6	0		6	123060630/123164058/123077770/123156484/123147894/123069256
BP	GO:0006091	generation of precursor metabolites and energy	23/1380	173/19183	0.00315518	0.0300018	123060630/123164058/123077770/123097283/123156484/123127923/123067330/123095662/123147894/123097282/123189489/123069256/123090631/123053591/123070270/123181626/123167365/123056109/novel.2337/123123282/123181322/123191445/123045718	LOC123060630/LOC123164058/LOC123077770/LOC123097283/LOC123156484/LOC123127923/LOC123067330/LOC123095662/LOC123147894/LOC123097282/LOC123189489/LOC123069256/LOC123090631/LOC123053591/LOC123070270/LOC123181626/LOC123167365/LOC123056109/-/LOC123123282/LOC123181322/LOC123191445/LOC123045718	23	4	123189489/123053591/123070270/123045718	19	123060630/123164058/123077770/123097283/123156484/123127923/123067330/123095662/123147894/123097282/123069256/123090631/123181626/123167365/123056109/novel.2337/123123282/123181322/123191445
BP	GO:0016051	carbohydrate biosynthetic process	23/1380	173/19183	0.00315518	0.0300018	123092719/123098016/123085323/123068318/123185146/123049142/100270668/123063345/123098428/123046969/123044576/123052445/123188320/123044578/123052444/123069878/123121827/123160297/123044580/123078310/123052443/123188324/123044579	LOC123092719/LOC123098016/LOC123085323/LOC123068318/LOC123185146/LOC123049142/LOC100270668/LOC123063345/LOC123098428/LOC123046969/LOC123044576/LOC123052445/LOC123188320/LOC123044578/LOC123052444/LOC123069878/LOC123121827/LOC123160297/LOC123044580/LOC123078310/LOC123052443/LOC123188324/LOC123044579	23	18	123092719/123098016/123085323/123185146/123049142/123046969/123044576/123052445/123188320/123044578/123052444/123069878/123160297/123044580/123078310/123052443/123188324/123044579	5	123068318/100270668/123063345/123098428/123121827
BP	GO:0016052	carbohydrate catabolic process	19/1380	135/19183	0.00369033	0.0344855	123044614/123188374/543318/123127923/123097577/123095662/123044617/123128167/123092239/123189489/123090631/123181646/543329/123053591/123070270/123181626/123052101/123167365/123045718	LOC123044614/LOC123188374/LOC543318/LOC123127923/LOC123097577/LOC123095662/LOC123044617/LOC123128167/LOC123092239/LOC123189489/LOC123090631/LOC123181646/LOC543329/LOC123053591/LOC123070270/LOC123181626/LOC123052101/LOC123167365/LOC123045718	19	11	123044614/543318/123097577/123128167/123092239/123189489/123181646/123053591/123070270/123052101/123045718	8	123188374/123127923/123095662/123044617/123090631/543329/123181626/123167365
BP	GO:0006821	chloride transport	7/1380	29/19183	0.00375974	0.0345387	123045549/123053389/123143623/123189297/123113787/123070428/123143624	LOC123045549/LOC123053389/LOC123143623/LOC123189297/LOC123113787/LOC123070428/LOC123143624	7	3	123045549/123053389/123189297	4	123143623/123113787/123070428/123143624
BP	GO:0019684	photosynthesis, light reaction	8/1380	37/19183	0.00414223	0.0374182	123097283/123067330/123097282/123056109/novel.2337/123123282/123181322/123191445	LOC123097283/LOC123067330/LOC123097282/LOC123056109/-/LOC123123282/LOC123181322/LOC123191445	8	0		8	123097283/123067330/123097282/123056109/novel.2337/123123282/123181322/123191445
BP	GO:0009607	response to biotic stimulus	6/1380	23/19183	0.00477501	0.0404384	123169410/123092354/123068354/101669865/123050578/123169411	LOC123169410/LOC123092354/LOC123068354/LOC101669865/LOC123050578/LOC123169411	6	6	123169410/123092354/123068354/101669865/123050578/123169411	0
BP	GO:0043207	response to external biotic stimulus	6/1380	23/19183	0.00477501	0.0404384	123169410/123092354/123068354/101669865/123050578/123169411	LOC123169410/LOC123092354/LOC123068354/LOC101669865/LOC123050578/LOC123169411	6	6	123169410/123092354/123068354/101669865/123050578/123169411	0
BP	GO:0051707	response to other organism	6/1380	23/19183	0.00477501	0.0404384	123169410/123092354/123068354/101669865/123050578/123169411	LOC123169410/LOC123092354/LOC123068354/LOC101669865/LOC123050578/LOC123169411	6	6	123169410/123092354/123068354/101669865/123050578/123169411	0
BP	GO:0098542	defense response to other organism	6/1380	23/19183	0.00477501	0.0404384	123169410/123092354/123068354/101669865/123050578/123169411	LOC123169410/LOC123092354/LOC123068354/LOC101669865/LOC123050578/LOC123169411	6	6	123169410/123092354/123068354/101669865/123050578/123169411	0
BP	GO:0034637	cellular carbohydrate biosynthetic process	20/1380	149/19183	0.00507782	0.0423412	123068318/123185146/123049142/100270668/123063345/123098428/123046969/123044576/123052445/123188320/123044578/123052444/123069878/123121827/123160297/123044580/123078310/123052443/123188324/123044579	LOC123068318/LOC123185146/LOC123049142/LOC100270668/LOC123063345/LOC123098428/LOC123046969/LOC123044576/LOC123052445/LOC123188320/LOC123044578/LOC123052444/LOC123069878/LOC123121827/LOC123160297/LOC123044580/LOC123078310/LOC123052443/LOC123188324/LOC123044579	20	15	123185146/123049142/123046969/123044576/123052445/123188320/123044578/123052444/123069878/123160297/123044580/123078310/123052443/123188324/123044579	5	123068318/100270668/123063345/123098428/123121827
BP	GO:0009772	photosynthetic electron transport in photosystem II	5/1380	17/19183	0.00569826	0.0467948	123067330/123097282/123056109/123123282/123181322	LOC123067330/LOC123097282/LOC123056109/LOC123123282/LOC123181322	5	0		5	123067330/123097282/123056109/123123282/123181322
BP	GO:0022900	electron transport chain	8/1380	41/19183	0.0079444	0.0642667	123097283/123067330/123097282/123056109/novel.2337/123123282/123181322/123191445	LOC123097283/LOC123067330/LOC123097282/LOC123056109/-/LOC123123282/LOC123181322/LOC123191445	8	0		8	123097283/123067330/123097282/123056109/novel.2337/123123282/123181322/123191445
BP	GO:0015980	energy derivation by oxidation of organic compounds	6/1380	26/19183	0.00905145	0.0710998	123060630/123164058/123077770/123156484/123147894/123069256	LOC123060630/LOC123164058/LOC123077770/LOC123156484/LOC123147894/LOC123069256	6	0		6	123060630/123164058/123077770/123156484/123147894/123069256
BP	GO:0045333	cellular respiration	6/1380	26/19183	0.00905145	0.0710998	123060630/123164058/123077770/123156484/123147894/123069256	LOC123060630/LOC123164058/LOC123077770/LOC123156484/LOC123147894/LOC123069256	6	0		6	123060630/123164058/123077770/123156484/123147894/123069256
BP	GO:0009308	amine metabolic process	15/1380	107/19183	0.00957353	0.0741265	123045745/123144311/123149681/123046279/123094885/123053593/123084804/123130341/123057652/123046080/101290606/123123214/123181824/123062219/123121802	LOC123045745/LOC123144311/LOC123149681/LOC123046279/LOC123094885/LOC123053593/LOC123084804/LOC123130341/LOC123057652/LOC123046080/LOC101290606/LOC123123214/LOC123181824/LOC123062219/LOC123121802	15	4	123094885/123084804/123123214/123062219	11	123045745/123144311/123149681/123046279/123053593/123130341/123057652/123046080/101290606/123181824/123121802
BP	GO:0006979	response to oxidative stress	32/1380	289/19183	0.00997351	0.0761358	123051568/123043706/123167064/123040643/123180481/123167327/123157228/123128512/123078819/123135651/123151337/123145638/123187496/123052925/123166692/123043697/123051366/123069666/123049562/123162590/123102836/123160997/123125588/123147832/123078151/123138383/123125416/123099926/100136987/123130109/123168223/123099010	LOC123051568/LOC123043706/LOC123167064/LOC123040643/LOC123180481/LOC123167327/LOC123157228/LOC123128512/LOC123078819/LOC123135651/LOC123151337/LOC123145638/LOC123187496/LOC123052925/LOC123166692/LOC123043697/LOC123051366/LOC123069666/LOC123049562/LOC123162590/LOC123102836/LOC123160997/LOC123125588/LOC123147832/LOC123078151/LOC123138383/LOC123125416/LOC123099926/LOC100136987/LOC123130109/LOC123168…	32	14	123180481/123157228/123128512/123135651/123145638/123166692/123069666/123162590/123102836/123147832/123078151/123138383/123125416/123099010	18	123051568/123043706/123167064/123040643/123167327/123078819/123151337/123187496/123052925/123043697/123051366/123049562/123160997/123125588/123099926/100136987/123130109/123168223
BP	GO:0015711	organic anion transport	9/1380	52/19183	0.0111206	0.0837137	543388/123163773/123150021/123098026/123100061/123090827/123094929/123189645/123092732	LOC543388/LOC123163773/LOC123150021/LOC123098026/LOC123100061/LOC123090827/LOC123094929/LOC123189645/LOC123092732	9	2	543388/123100061	7	123163773/123150021/123098026/123090827/123094929/123189645/123092732
BP	GO:0005985	sucrose metabolic process	7/1380	36/19183	0.0129619	0.096238	123092190/123085854/123097521/123187938/542972/123046325/123054180	LOC123092190/LOC123085854/LOC123097521/LOC123187938/LOC542972/LOC123046325/LOC123054180	7	7	123092190/123085854/123097521/123187938/542972/123046325/123054180	0
BP	GO:0006528	asparagine metabolic process	4/1380	14/19183	0.01489	0.107605	123120509/606323/123103220/123060166	LOC123120509/LOC606323/LOC123103220/LOC123060166	4	4	123120509/606323/123103220/123060166	0
BP	GO:0006529	asparagine biosynthetic process	4/1380	14/19183	0.01489	0.107605	123120509/606323/123103220/123060166	LOC123120509/LOC606323/LOC123103220/LOC123060166	4	4	123120509/606323/123103220/123060166	0
BP	GO:0006308	DNA catabolic process	6/1380	31/19183	0.0213146	0.150033	123054895/123073776/123068347/123190737/123050333/123047069	LOC123054895/LOC123073776/LOC123068347/LOC123190737/LOC123050333/LOC123047069	6	6	123054895/123073776/123068347/123190737/123050333/123047069	0
BP	GO:0009605	response to external stimulus	6/1380	31/19183	0.0213146	0.150033	123169410/123092354/123068354/101669865/123050578/123169411	LOC123169410/LOC123092354/LOC123068354/LOC101669865/LOC123050578/LOC123169411	6	6	123169410/123092354/123068354/101669865/123050578/123169411	0
BP	GO:0015849	organic acid transport	8/1380	49/19183	0.0226058	0.155093	543388/123163773/123150021/123098026/123100061/123090827/123189645/123092732	LOC543388/LOC123163773/LOC123150021/LOC123098026/LOC123100061/LOC123090827/LOC123189645/LOC123092732	8	2	543388/123100061	6	123163773/123150021/123098026/123090827/123189645/123092732
BP	GO:0046942	carboxylic acid transport	8/1380	49/19183	0.0226058	0.155093	543388/123163773/123150021/123098026/123100061/123090827/123189645/123092732	LOC543388/LOC123163773/LOC123150021/LOC123098026/LOC123100061/LOC123090827/LOC123189645/LOC123092732	8	2	543388/123100061	6	123163773/123150021/123098026/123090827/123189645/123092732
BP	GO:0008272	sulfate transport	5/1380	24/19183	0.0257609	0.172375	100415856/123070775/123079164/123087984/123150081	LOC100415856/LOC123070775/LOC123079164/LOC123087984/LOC123150081	5	4	123070775/123079164/123087984/123150081	1	100415856
BP	GO:0072348	sulfur compound transport	5/1380	24/19183	0.0257609	0.172375	100415856/123070775/123079164/123087984/123150081	LOC100415856/LOC123070775/LOC123079164/LOC123087984/LOC123150081	5	4	123070775/123079164/123087984/123150081	1	100415856
BP	GO:0006952	defense response	12/1380	90/19183	0.027444	0.181398	123169410/100526689/123092354/123068354/101669865/123050578/123182050/123190348/123046621/123169411/123054493/123046838	LOC123169410/LOC100526689/LOC123092354/LOC123068354/LOC101669865/LOC123050578/LOC123182050/LOC123190348/LOC123046621/LOC123169411/LOC123054493/LOC123046838	12	9	123169410/100526689/123092354/123068354/101669865/123050578/123182050/123169411/123046838	3	123190348/123046621/123054493
BP	GO:0006006	glucose metabolic process	6/1380	33/19183	0.0283911	0.185397	123092719/123098016/123085323/123097577/123053692/123092239	LOC123092719/LOC123098016/LOC123085323/LOC123097577/LOC123053692/LOC123092239	6	6	123092719/123098016/123085323/123097577/123053692/123092239	0
BP	GO:0072350	tricarboxylic acid metabolic process	7/1380	42/19183	0.0288567	0.186194	123060630/123164058/123077770/123156484/123094885/123147894/123069256	LOC123060630/LOC123164058/LOC123077770/LOC123156484/LOC123094885/LOC123147894/LOC123069256	7	1	123094885	6	123060630/123164058/123077770/123156484/123147894/123069256
BP	GO:0006855	drug transmembrane transport	18/1380	158/19183	0.0352985	0.219906	123072603/123128714/123045265/123091631/123137373/123182400/123097997/123067098/123165308/123073943/123092880/123158179/123157508/123093441/123123915/123101504/123103118/123051820	LOC123072603/LOC123128714/LOC123045265/LOC123091631/LOC123137373/LOC123182400/LOC123097997/LOC123067098/LOC123165308/LOC123073943/LOC123092880/LOC123158179/LOC123157508/LOC123093441/LOC123123915/LOC123101504/LOC123103118/LOC123051820	18	14	123072603/123128714/123045265/123091631/123137373/123182400/123097997/123067098/123165308/123158179/123157508/123093441/123101504/123103118	4	123073943/123092880/123123915/123051820
BP	GO:0015893	drug transport	18/1380	158/19183	0.0352985	0.219906	123072603/123128714/123045265/123091631/123137373/123182400/123097997/123067098/123165308/123073943/123092880/123158179/123157508/123093441/123123915/123101504/123103118/123051820	LOC123072603/LOC123128714/LOC123045265/LOC123091631/LOC123137373/LOC123182400/LOC123097997/LOC123067098/LOC123165308/LOC123073943/LOC123092880/LOC123158179/LOC123157508/LOC123093441/LOC123123915/LOC123101504/LOC123103118/LOC123051820	18	14	123072603/123128714/123045265/123091631/123137373/123182400/123097997/123067098/123165308/123158179/123157508/123093441/123101504/123103118	4	123073943/123092880/123123915/123051820
BP	GO:0042493	response to drug	18/1380	158/19183	0.0352985	0.219906	123072603/123128714/123045265/123091631/123137373/123182400/123097997/123067098/123165308/123073943/123092880/123158179/123157508/123093441/123123915/123101504/123103118/123051820	LOC123072603/LOC123128714/LOC123045265/LOC123091631/LOC123137373/LOC123182400/LOC123097997/LOC123067098/LOC123165308/LOC123073943/LOC123092880/LOC123158179/LOC123157508/LOC123093441/LOC123123915/LOC123101504/LOC123103118/LOC123051820	18	14	123072603/123128714/123045265/123091631/123137373/123182400/123097997/123067098/123165308/123158179/123157508/123093441/123101504/123103118	4	123073943/123092880/123123915/123051820
BP	GO:0006835	dicarboxylic acid transport	3/1380	11/19183	0.0396144	0.238567	543388/123163773/123150021	LOC543388/LOC123163773/LOC123150021	3	1	543388	2	123163773/123150021
BP	GO:0015740	C4-dicarboxylate transport	3/1380	11/19183	0.0396144	0.238567	543388/123163773/123150021	LOC543388/LOC123163773/LOC123150021	3	1	543388	2	123163773/123150021
BP	GO:0015743	malate transport	3/1380	11/19183	0.0396144	0.238567	543388/123163773/123150021	LOC543388/LOC123163773/LOC123150021	3	1	543388	2	123163773/123150021
BP	GO:0006334	nucleosome assembly	8/1380	55/19183	0.0419067	0.246885	123113721/606309/606312/123083199/123113726/123123238/123189949/123105439	LOC123113721/LOC606309/LOC606312/LOC123083199/LOC123113726/LOC123123238/LOC123189949/LOC123105439	8	2	123083199/123189949	6	123113721/606309/606312/123113726/123123238/123105439
BP	GO:0031497	chromatin assembly	8/1380	55/19183	0.0419067	0.246885	123113721/606309/606312/123083199/123113726/123123238/123189949/123105439	LOC123113721/LOC606309/LOC606312/LOC123083199/LOC123113726/LOC123123238/LOC123189949/LOC123105439	8	2	123083199/123189949	6	123113721/606309/606312/123113726/123123238/123105439
BP	GO:0005996	monosaccharide metabolic process	9/1380	67/19183	0.0498193	0.266028	123092719/123098016/123085323/123097577/123091621/123053692/123092239/123097626/123085717	LOC123092719/LOC123098016/LOC123085323/LOC123097577/LOC123091621/LOC123053692/LOC123092239/LOC123097626/LOC123085717	9	6	123092719/123098016/123085323/123097577/123053692/123092239	3	123091621/123097626/123085717
BP	GO:0006094	gluconeogenesis	3/1380	12/19183	0.0500643	0.266028	123092719/123098016/123085323	LOC123092719/LOC123098016/LOC123085323	3	3	123092719/123098016/123085323	0
BP	GO:0006534	cysteine metabolic process	3/1380	12/19183	0.0500643	0.266028	123093127/123098400/123084953	LOC123093127/LOC123098400/LOC123084953	3	0		3	123093127/123098400/123084953
BP	GO:0006535	cysteine biosynthetic process from serine	3/1380	12/19183	0.0500643	0.266028	123093127/123098400/123084953	LOC123093127/LOC123098400/LOC123084953	3	0		3	123093127/123098400/123084953
BP	GO:0006563	L-serine metabolic process	3/1380	12/19183	0.0500643	0.266028	123093127/123098400/123084953	LOC123093127/LOC123098400/LOC123084953	3	0		3	123093127/123098400/123084953
BP	GO:0009070	serine family amino acid biosynthetic process	3/1380	12/19183	0.0500643	0.266028	123093127/123098400/123084953	LOC123093127/LOC123098400/LOC123084953	3	0		3	123093127/123098400/123084953
BP	GO:0019319	hexose biosynthetic process	3/1380	12/19183	0.0500643	0.266028	123092719/123098016/123085323	LOC123092719/LOC123098016/LOC123085323	3	3	123092719/123098016/123085323	0
BP	GO:0019344	cysteine biosynthetic process	3/1380	12/19183	0.0500643	0.266028	123093127/123098400/123084953	LOC123093127/LOC123098400/LOC123084953	3	0		3	123093127/123098400/123084953
BP	GO:0046364	monosaccharide biosynthetic process	3/1380	12/19183	0.0500643	0.266028	123092719/123098016/123085323	LOC123092719/LOC123098016/LOC123085323	3	3	123092719/123098016/123085323	0
BP	GO:0071941	nitrogen cycle metabolic process	3/1380	12/19183	0.0500643	0.266028	123135422/123131635/123143006	LOC123135422/LOC123131635/LOC123143006	3	0		3	123135422/123131635/123143006
BP	GO:0006814	sodium ion transport	4/1380	20/19183	0.0511757	0.266704	123166012/123121908/123065334/123156406	LOC123166012/LOC123121908/LOC123065334/LOC123156406	4	2	123121908/123065334	2	123166012/123156406
BP	GO:0043631	RNA polyadenylation	4/1380	20/19183	0.0511757	0.266704	123165686/123043606/123151266/123160920	LOC123165686/LOC123043606/LOC123151266/LOC123160920	4	3	123165686/123151266/123160920	1	123043606
BP	GO:0034728	nucleosome organization	8/1380	58/19183	0.0547347	0.280082	123113721/606309/606312/123083199/123113726/123123238/123189949/123105439	LOC123113721/LOC606309/LOC606312/LOC123083199/LOC123113726/LOC123123238/LOC123189949/LOC123105439	8	2	123083199/123189949	6	123113721/606309/606312/123113726/123123238/123105439
BP	GO:0044255	cellular lipid metabolic process	37/1380	392/19183	0.0547763	0.280082	123098215/100270666/123168027/123079301/123085176/123085149/123105435/123098077/123167910/123155757/123180032/123148128/123084705/123068212/123102951/123098428/123070918/123163916/123088641/123139638/123099318/123100061/123146095/123143431/123078902/123131911/123134258/123090827/123069734/123183009/123062298/123095790/123188274/123093211/123086141/123065590/123093812	LOC123098215/LOC100270666/LOC123168027/LOC123079301/LOC123085176/LOC123085149/LOC123105435/LOC123098077/LOC123167910/LOC123155757/LOC123180032/LOC123148128/LOC123084705/LOC123068212/LOC123102951/LOC123098428/LOC123070918/LOC123163916/LOC123088641/LOC123139638/LOC123099318/LOC123100061/LOC123146095/LOC123143431/LOC123078902/LOC123131911/LOC123134258/LOC123090827/LOC123069734/LOC123183009/LOC123062…	37	26	123098215/100270666/123168027/123079301/123085176/123085149/123098077/123155757/123148128/123084705/123070918/123163916/123088641/123139638/123099318/123100061/123146095/123143431/123078902/123183009/123062298/123095790/123093211/123086141/123065590/123093812	11	123105435/123167910/123180032/123068212/123102951/123098428/123131911/123134258/123090827/123069734/123188274
BP	GO:0065004	protein-DNA complex assembly	8/1380	59/19183	0.0595103	0.297096	123113721/606309/606312/123083199/123113726/123123238/123189949/123105439	LOC123113721/LOC606309/LOC606312/LOC123083199/LOC123113726/LOC123123238/LOC123189949/LOC123105439	8	2	123083199/123189949	6	123113721/606309/606312/123113726/123123238/123105439
BP	GO:0009094	L-phenylalanine biosynthetic process	4/1380	21/19183	0.0597481	0.297096	123049559/123122682/123113163/123041365	LOC123049559/LOC123122682/LOC123113163/LOC123041365	4	3	123122682/123113163/123041365	1	123049559
BP	GO:1902223	erythrose 4-phosphate/phosphoenolpyruvate family amino acid biosynthetic process	4/1380	21/19183	0.0597481	0.297096	123049559/123122682/123113163/123041365	LOC123049559/LOC123122682/LOC123113163/LOC123041365	4	3	123122682/123113163/123041365	1	123049559
BP	GO:0065008	regulation of biological quality	35/1380	372/19183	0.0625708	0.308304	123115661/123190554/123063024/123149681/123128593/123080234/542857/123046279/123145716/123106502/123053593/123115656/123130341/123070127/123124288/123046080/123043648/123138464/123065513/123061486/101290606/123106512/123124289/123048669/123124291/123106507/123058447/123074613/123181824/123124465/123062219/123121802/123115849/123106511/123124464	LOC123115661/LOC123190554/LOC123063024/LOC123149681/LOC123128593/LOC123080234/LOC542857/LOC123046279/LOC123145716/LOC123106502/LOC123053593/LOC123115656/LOC123130341/LOC123070127/LOC123124288/LOC123046080/LOC123043648/LOC123138464/LOC123065513/LOC123061486/LOC101290606/LOC123106512/LOC123124289/LOC123048669/LOC123124291/LOC123106507/LOC123058447/LOC123074613/LOC123181824/LOC123124465/LOC123062219…	35	12	123128593/542857/123145716/123070127/123043648/123138464/123065513/123061486/123048669/123058447/123074613/123062219	23	123115661/123190554/123063024/123149681/123080234/123046279/123106502/123053593/123115656/123130341/123124288/123046080/101290606/123106512/123124289/123124291/123106507/123181824/123124465/123121802/123115849/123106511/123124464
BP	GO:0051704	multi-organism process	25/1380	252/19183	0.0638836	0.311936	123169410/123138797/123113145/123190963/123092354/123182519/123068354/123162825/101669865/123050578/123047258/123055045/123061459/123186225/123054749/123164824/123169411/123062267/123053882/123051180/123047261/123050505/123054748/123060135/123179830	LOC123169410/LOC123138797/LOC123113145/LOC123190963/LOC123092354/LOC123182519/LOC123068354/LOC123162825/LOC101669865/LOC123050578/LOC123047258/LOC123055045/LOC123061459/LOC123186225/LOC123054749/LOC123164824/LOC123169411/LOC123062267/LOC123053882/LOC123051180/LOC123047261/LOC123050505/LOC123054748/LOC123060135/LOC123179830	25	13	123169410/123138797/123092354/123182519/123068354/101669865/123050578/123061459/123186225/123164824/123169411/123062267/123054748	12	123113145/123190963/123162825/123047258/123055045/123054749/123053882/123051180/123047261/123050505/123060135/123179830
BP	GO:0006333	chromatin assembly or disassembly	8/1380	60/19183	0.0645399	0.312327	123113721/606309/606312/123083199/123113726/123123238/123189949/123105439	LOC123113721/LOC606309/LOC606312/LOC123083199/LOC123113726/LOC123123238/LOC123189949/LOC123105439	8	2	123083199/123189949	6	123113721/606309/606312/123113726/123123238/123105439
BP	GO:0006323	DNA packaging	8/1380	61/19183	0.0698254	0.334915	123113721/606309/606312/123083199/123113726/123123238/123189949/123105439	LOC123113721/LOC606309/LOC606312/LOC123083199/LOC123113726/LOC123123238/LOC123189949/LOC123105439	8	2	123083199/123189949	6	123113721/606309/606312/123113726/123123238/123105439
BP	GO:0009069	serine family amino acid metabolic process	3/1380	14/19183	0.0744708	0.344984	123093127/123098400/123084953	LOC123093127/LOC123098400/LOC123084953	3	0		3	123093127/123098400/123084953
BP	GO:0019321	pentose metabolic process	3/1380	14/19183	0.0744708	0.344984	123091621/123097626/123085717	LOC123091621/LOC123097626/LOC123085717	3	0		3	123091621/123097626/123085717
BP	GO:0019566	arabinose metabolic process	3/1380	14/19183	0.0744708	0.344984	123091621/123097626/123085717	LOC123091621/LOC123097626/LOC123085717	3	0		3	123091621/123097626/123085717
BP	GO:0046373	L-arabinose metabolic process	3/1380	14/19183	0.0744708	0.344984	123091621/123097626/123085717	LOC123091621/LOC123097626/LOC123085717	3	0		3	123091621/123097626/123085717
BP	GO:0071824	protein-DNA complex subunit organization	8/1380	62/19183	0.0753676	0.34618	123113721/606309/606312/123083199/123113726/123123238/123189949/123105439	LOC123113721/LOC606309/LOC606312/LOC123083199/LOC123113726/LOC123123238/LOC123189949/LOC123105439	8	2	123083199/123189949	6	123113721/606309/606312/123113726/123123238/123105439
BP	GO:0048583	regulation of response to stimulus	6/1380	42/19183	0.0782589	0.35644	123169410/123092354/123068354/101669865/123169411/123056785	LOC123169410/LOC123092354/LOC123068354/LOC101669865/LOC123169411/LOC123056785	6	6	123169410/123092354/123068354/101669865/123169411/123056785	0
BP	GO:0046165	alcohol biosynthetic process	3/1380	15/19183	0.088296	0.395076	123106148/123098428/123099184	LOC123106148/LOC123098428/LOC123099184	3	0		3	123106148/123098428/123099184
BP	GO:0046173	polyol biosynthetic process	3/1380	15/19183	0.088296	0.395076	123106148/123098428/123099184	LOC123106148/LOC123098428/LOC123099184	3	0		3	123106148/123098428/123099184
BP	GO:0006558	L-phenylalanine metabolic process	4/1380	24/19183	0.0896575	0.395076	123049559/123122682/123113163/123041365	LOC123049559/LOC123122682/LOC123113163/LOC123041365	4	3	123122682/123113163/123041365	1	123049559
BP	GO:1902221	erythrose 4-phosphate/phosphoenolpyruvate family amino acid metabolic process	4/1380	24/19183	0.0896575	0.395076	123049559/123122682/123113163/123041365	LOC123049559/LOC123122682/LOC123113163/LOC123041365	4	3	123122682/123113163/123041365	1	123049559
BP	GO:0042546	cell wall biogenesis	6/1380	44/19183	0.0935055	0.40871	123113352/543124/123183231/123055623/123186687/123110820	LOC123113352/LOC543124/LOC123183231/LOC123055623/LOC123186687/LOC123110820	6	4	123113352/543124/123186687/123110820	2	123183231/123055623
BP	GO:1901607	alpha-amino acid biosynthetic process	13/1380	122/19183	0.09976	0.432559	123120509/606323/123111229/123103220/123093127/123060166/123098400/123049559/123122682/123044668/123113163/123084953/123041365	LOC123120509/LOC606323/LOC123111229/LOC123103220/LOC123093127/LOC123060166/LOC123098400/LOC123049559/LOC123122682/LOC123044668/LOC123113163/LOC123084953/LOC123041365	13	9	123120509/606323/123111229/123103220/123060166/123122682/123044668/123113163/123041365	4	123093127/123098400/123049559/123084953
BP	GO:0005984	disaccharide metabolic process	9/1380	80/19183	0.120066	0.516474	123092190/123085854/123097521/100270668/123187938/123063345/542972/123046325/123054180	LOC123092190/LOC123085854/LOC123097521/LOC100270668/LOC123187938/LOC123063345/LOC542972/LOC123046325/LOC123054180	9	7	123092190/123085854/123097521/123187938/542972/123046325/123054180	2	100270668/123063345
BP	GO:0000097	sulfur amino acid biosynthetic process	3/1380	18/19183	0.135329	0.543671	123093127/123098400/123084953	LOC123093127/LOC123098400/LOC123084953	3	0		3	123093127/123098400/123084953
BP	GO:0031124	mRNA 3'-end processing	3/1380	18/19183	0.135329	0.543671	123165686/123151266/123160920	LOC123165686/LOC123151266/LOC123160920	3	3	123165686/123151266/123160920	0
BP	GO:0009664	plant-type cell wall organization	4/1380	28/19183	0.138425	0.543671	123113352/543124/123055623/123110820	LOC123113352/LOC543124/LOC123055623/LOC123110820	4	3	123113352/543124/123110820	1	123055623
BP	GO:0009832	plant-type cell wall biogenesis	4/1380	28/19183	0.138425	0.543671	123113352/543124/123055623/123110820	LOC123113352/LOC543124/LOC123055623/LOC123110820	4	3	123113352/543124/123110820	1	123055623
BP	GO:0010215	cellulose microfibril organization	4/1380	28/19183	0.138425	0.543671	123113352/543124/123055623/123110820	LOC123113352/LOC543124/LOC123055623/LOC123110820	4	3	123113352/543124/123110820	1	123055623
BP	GO:0016049	cell growth	4/1380	28/19183	0.138425	0.543671	123113352/543124/123055623/123110820	LOC123113352/LOC543124/LOC123055623/LOC123110820	4	3	123113352/543124/123110820	1	123055623
BP	GO:0030198	extracellular matrix organization	4/1380	28/19183	0.138425	0.543671	123113352/543124/123055623/123110820	LOC123113352/LOC543124/LOC123055623/LOC123110820	4	3	123113352/543124/123110820	1	123055623
BP	GO:0040007	growth	4/1380	28/19183	0.138425	0.543671	123113352/543124/123055623/123110820	LOC123113352/LOC543124/LOC123055623/LOC123110820	4	3	123113352/543124/123110820	1	123055623
BP	GO:0043062	extracellular structure organization	4/1380	28/19183	0.138425	0.543671	123113352/543124/123055623/123110820	LOC123113352/LOC543124/LOC123055623/LOC123110820	4	3	123113352/543124/123110820	1	123055623
BP	GO:0070726	cell wall assembly	4/1380	28/19183	0.138425	0.543671	123113352/543124/123055623/123110820	LOC123113352/LOC543124/LOC123055623/LOC123110820	4	3	123113352/543124/123110820	1	123055623
BP	GO:0071668	plant-type cell wall assembly	4/1380	28/19183	0.138425	0.543671	123113352/543124/123055623/123110820	LOC123113352/LOC543124/LOC123055623/LOC123110820	4	3	123113352/543124/123110820	1	123055623
BP	GO:0071669	plant-type cell wall organization or biogenesis	4/1380	28/19183	0.138425	0.543671	123113352/543124/123055623/123110820	LOC123113352/LOC543124/LOC123055623/LOC123110820	4	3	123113352/543124/123110820	1	123055623
BP	GO:1901605	alpha-amino acid metabolic process	16/1380	166/19183	0.142208	0.55451	123120509/606323/123144311/123111229/123103220/123093127/123060166/123098400/123049559/123122682/123044668/123057652/123113163/123084953/123123214/123041365	LOC123120509/LOC606323/LOC123144311/LOC123111229/LOC123103220/LOC123093127/LOC123060166/LOC123098400/LOC123049559/LOC123122682/LOC123044668/LOC123057652/LOC123113163/LOC123084953/LOC123123214/LOC123041365	16	10	123120509/606323/123111229/123103220/123060166/123122682/123044668/123113163/123123214/123041365	6	123144311/123093127/123098400/123049559/123057652/123084953
BP	GO:0009095	aromatic amino acid family biosynthetic process, prephenate pathway	4/1380	30/19183	0.166045	0.620115	123049559/123122682/123113163/123041365	LOC123049559/LOC123122682/LOC123113163/LOC123041365	4	3	123122682/123113163/123041365	1	123049559
BP	GO:0003006	developmental process involved in reproduction	3/1380	20/19183	0.170474	0.620115	123167003/123083460/123134214	LOC123167003/LOC123083460/LOC123134214	3	3	123167003/123083460/123134214	0
BP	GO:0009790	embryo development	3/1380	20/19183	0.170474	0.620115	123167003/123083460/123134214	LOC123167003/LOC123083460/LOC123134214	3	3	123167003/123083460/123134214	0
BP	GO:0009793	embryo development ending in seed dormancy	3/1380	20/19183	0.170474	0.620115	123167003/123083460/123134214	LOC123167003/LOC123083460/LOC123134214	3	3	123167003/123083460/123134214	0
BP	GO:0010154	fruit development	3/1380	20/19183	0.170474	0.620115	123167003/123083460/123134214	LOC123167003/LOC123083460/LOC123134214	3	3	123167003/123083460/123134214	0
BP	GO:0015689	molybdate ion transport	3/1380	20/19183	0.170474	0.620115	123124242/123099272/123164301	LOC123124242/LOC123099272/LOC123164301	3	2	123124242/123099272	1	123164301
BP	GO:0048316	seed development	3/1380	20/19183	0.170474	0.620115	123167003/123083460/123134214	LOC123167003/LOC123083460/LOC123134214	3	3	123167003/123083460/123134214	0
BP	GO:0048608	reproductive structure development	3/1380	20/19183	0.170474	0.620115	123167003/123083460/123134214	LOC123167003/LOC123083460/LOC123134214	3	3	123167003/123083460/123134214	0
BP	GO:0048731	system development	3/1380	20/19183	0.170474	0.620115	123167003/123083460/123134214	LOC123167003/LOC123083460/LOC123134214	3	3	123167003/123083460/123134214	0
BP	GO:0061458	reproductive system development	3/1380	20/19183	0.170474	0.620115	123167003/123083460/123134214	LOC123167003/LOC123083460/LOC123134214	3	3	123167003/123083460/123134214	0
BP	GO:0019318	hexose metabolic process	6/1380	53/19183	0.179317	0.647931	123092719/123098016/123085323/123097577/123053692/123092239	LOC123092719/LOC123098016/LOC123085323/LOC123097577/LOC123053692/LOC123092239	6	6	123092719/123098016/123085323/123097577/123053692/123092239	0
BP	GO:0031123	RNA 3'-end processing	4/1380	31/19183	0.180533	0.648007	123165686/123043606/123151266/123160920	LOC123165686/LOC123043606/LOC123151266/LOC123160920	4	3	123165686/123151266/123160920	1	123043606
BP	GO:0006072	glycerol-3-phosphate metabolic process	2/1380	11/19183	0.185003	0.651114	123060930/123079738	LOC123060930/LOC123079738	2	2	123060930/123079738	0
BP	GO:0046168	glycerol-3-phosphate catabolic process	2/1380	11/19183	0.185003	0.651114	123060930/123079738	LOC123060930/LOC123079738	2	2	123060930/123079738	0
BP	GO:0052646	alditol phosphate metabolic process	2/1380	11/19183	0.185003	0.651114	123060930/123079738	LOC123060930/LOC123079738	2	2	123060930/123079738	0
BP	GO:1901617	organic hydroxy compound biosynthetic process	3/1380	21/19183	0.188929	0.651214	123106148/123098428/123099184	LOC123106148/LOC123098428/LOC123099184	3	0		3	123106148/123098428/123099184
BP	GO:0009067	aspartate family amino acid biosynthetic process	4/1380	32/19183	0.195422	0.651214	123120509/606323/123103220/123060166	LOC123120509/LOC606323/LOC123103220/LOC123060166	4	4	123120509/606323/123103220/123060166	0
BP	GO:0045454	cell redox homeostasis	23/1380	264/19183	0.197142	0.651214	123115661/123190554/123063024/123080234/542857/123106502/123115656/123070127/123124288/123043648/123065513/123061486/123106512/123124289/123048669/123124291/123106507/123058447/123074613/123124465/123115849/123106511/123124464	LOC123115661/LOC123190554/LOC123063024/LOC123080234/LOC542857/LOC123106502/LOC123115656/LOC123070127/LOC123124288/LOC123043648/LOC123065513/LOC123061486/LOC123106512/LOC123124289/LOC123048669/LOC123124291/LOC123106507/LOC123058447/LOC123074613/LOC123124465/LOC123115849/LOC123106511/LOC123124464	23	8	542857/123070127/123043648/123065513/123061486/123048669/123058447/123074613	15	123115661/123190554/123063024/123080234/123106502/123115656/123124288/123106512/123124289/123124291/123106507/123124465/123115849/123106511/123124464
BP	GO:0000160	phosphorelay signal transduction system	8/1380	78/19183	0.197312	0.651214	123169796/123080746/123061942/101290612/123079047/123157033/123053388/123144843	LOC123169796/LOC123080746/LOC123061942/LOC101290612/LOC123079047/LOC123157033/LOC123053388/LOC123144843	8	3	123061942/123079047/123144843	5	123169796/123080746/101290612/123157033/123053388
BP	GO:0000003	reproduction	22/1380	252/19183	0.200775	0.651214	123167003/123138797/123113145/123190963/123083460/123182519/123162825/123047258/123055045/123061459/123186225/123054749/123164824/123062267/123053882/123134214/123051180/123047261/123050505/123054748/123060135/123179830	LOC123167003/LOC123138797/LOC123113145/LOC123190963/LOC123083460/LOC123182519/LOC123162825/LOC123047258/LOC123055045/LOC123061459/LOC123186225/LOC123054749/LOC123164824/LOC123062267/LOC123053882/LOC123134214/LOC123051180/LOC123047261/LOC123050505/LOC123054748/LOC123060135/LOC123179830	22	10	123167003/123138797/123083460/123182519/123061459/123186225/123164824/123062267/123134214/123054748	12	123113145/123190963/123162825/123047258/123055045/123054749/123053882/123051180/123047261/123050505/123060135/123179830
BP	GO:0022414	reproductive process	22/1380	252/19183	0.200775	0.651214	123167003/123138797/123113145/123190963/123083460/123182519/123162825/123047258/123055045/123061459/123186225/123054749/123164824/123062267/123053882/123134214/123051180/123047261/123050505/123054748/123060135/123179830	LOC123167003/LOC123138797/LOC123113145/LOC123190963/LOC123083460/LOC123182519/LOC123162825/LOC123047258/LOC123055045/LOC123061459/LOC123186225/LOC123054749/LOC123164824/LOC123062267/LOC123053882/LOC123134214/LOC123051180/LOC123047261/LOC123050505/LOC123054748/LOC123060135/LOC123179830	22	10	123167003/123138797/123083460/123182519/123061459/123186225/123164824/123062267/123134214/123054748	12	123113145/123190963/123162825/123047258/123055045/123054749/123053882/123051180/123047261/123050505/123060135/123179830
BP	GO:0000079	regulation of cyclin-dependent protein serine/threonine kinase activity	3/1380	22/19183	0.20786	0.651214	123042223/123050156/123186205	LOC123042223/LOC123050156/LOC123186205	3	0		3	123042223/123050156/123186205
BP	GO:0001932	regulation of protein phosphorylation	3/1380	22/19183	0.20786	0.651214	123042223/123050156/123186205	LOC123042223/LOC123050156/LOC123186205	3	0		3	123042223/123050156/123186205
BP	GO:0006066	alcohol metabolic process	3/1380	22/19183	0.20786	0.651214	123106148/123098428/123099184	LOC123106148/LOC123098428/LOC123099184	3	0		3	123106148/123098428/123099184
BP	GO:0019751	polyol metabolic process	3/1380	22/19183	0.20786	0.651214	123106148/123098428/123099184	LOC123106148/LOC123098428/LOC123099184	3	0		3	123106148/123098428/123099184
BP	GO:0042325	regulation of phosphorylation	3/1380	22/19183	0.20786	0.651214	123042223/123050156/123186205	LOC123042223/LOC123050156/LOC123186205	3	0		3	123042223/123050156/123186205
BP	GO:0043549	regulation of kinase activity	3/1380	22/19183	0.20786	0.651214	123042223/123050156/123186205	LOC123042223/LOC123050156/LOC123186205	3	0		3	123042223/123050156/123186205
BP	GO:0045859	regulation of protein kinase activity	3/1380	22/19183	0.20786	0.651214	123042223/123050156/123186205	LOC123042223/LOC123050156/LOC123186205	3	0		3	123042223/123050156/123186205
BP	GO:0051338	regulation of transferase activity	3/1380	22/19183	0.20786	0.651214	123042223/123050156/123186205	LOC123042223/LOC123050156/LOC123186205	3	0		3	123042223/123050156/123186205
BP	GO:0071900	regulation of protein serine/threonine kinase activity	3/1380	22/19183	0.20786	0.651214	123042223/123050156/123186205	LOC123042223/LOC123050156/LOC123186205	3	0		3	123042223/123050156/123186205
BP	GO:0098656	anion transmembrane transport	3/1380	22/19183	0.20786	0.651214	123098026/123189645/123092732	LOC123098026/LOC123189645/LOC123092732	3	0		3	123098026/123189645/123092732
BP	GO:1903825	organic acid transmembrane transport	3/1380	22/19183	0.20786	0.651214	123098026/123189645/123092732	LOC123098026/LOC123189645/LOC123092732	3	0		3	123098026/123189645/123092732
BP	GO:1904029	regulation of cyclin-dependent protein kinase activity	3/1380	22/19183	0.20786	0.651214	123042223/123050156/123186205	LOC123042223/LOC123050156/LOC123186205	3	0		3	123042223/123050156/123186205
BP	GO:1905039	carboxylic acid transmembrane transport	3/1380	22/19183	0.20786	0.651214	123098026/123189645/123092732	LOC123098026/LOC123189645/LOC123092732	3	0		3	123098026/123189645/123092732
BP	GO:0009311	oligosaccharide metabolic process	9/1380	92/19183	0.215793	0.672184	123092190/123085854/123097521/100270668/123187938/123063345/542972/123046325/123054180	LOC123092190/LOC123085854/LOC123097521/LOC100270668/LOC123187938/LOC123063345/LOC542972/LOC123046325/LOC123054180	9	7	123092190/123085854/123097521/123187938/542972/123046325/123054180	2	100270668/123063345
BP	GO:0044272	sulfur compound biosynthetic process	6/1380	57/19183	0.22498	0.696795	123158946/123093127/123098400/123087299/123084953/123051558	LOC123158946/LOC123093127/LOC123098400/LOC123087299/LOC123084953/LOC123051558	6	1	123158946	5	123093127/123098400/123087299/123084953/123051558
BP	GO:0009791	post-embryonic development	3/1380	23/19183	0.227188	0.699635	123167003/123083460/123134214	LOC123167003/LOC123083460/LOC123134214	3	3	123167003/123083460/123134214	0
BP	GO:0019725	cellular homeostasis	23/1380	271/19183	0.233348	0.714547	123115661/123190554/123063024/123080234/542857/123106502/123115656/123070127/123124288/123043648/123065513/123061486/123106512/123124289/123048669/123124291/123106507/123058447/123074613/123124465/123115849/123106511/123124464	LOC123115661/LOC123190554/LOC123063024/LOC123080234/LOC542857/LOC123106502/LOC123115656/LOC123070127/LOC123124288/LOC123043648/LOC123065513/LOC123061486/LOC123106512/LOC123124289/LOC123048669/LOC123124291/LOC123106507/LOC123058447/LOC123074613/LOC123124465/LOC123115849/LOC123106511/LOC123124464	23	8	542857/123070127/123043648/123065513/123061486/123048669/123058447/123074613	15	123115661/123190554/123063024/123080234/123106502/123115656/123124288/123106512/123124289/123124291/123106507/123124465/123115849/123106511/123124464
BP	GO:0034655	nucleobase-containing compound catabolic process	15/1380	169/19183	0.235097	0.715856	123054895/123127923/123073776/123095662/123068347/123190737/123189489/123090631/123050333/123053591/123070270/123181626/123167365/123047069/123045718	LOC123054895/LOC123127923/LOC123073776/LOC123095662/LOC123068347/LOC123190737/LOC123189489/LOC123090631/LOC123050333/LOC123053591/LOC123070270/LOC123181626/LOC123167365/LOC123047069/LOC123045718	15	10	123054895/123073776/123068347/123190737/123189489/123050333/123053591/123070270/123047069/123045718	5	123127923/123095662/123090631/123181626/123167365
BP	GO:0008652	cellular amino acid biosynthetic process	13/1380	144/19183	0.236643	0.71654	123120509/606323/123111229/123103220/123093127/123060166/123098400/123049559/123122682/123044668/123113163/123084953/123041365	LOC123120509/LOC606323/LOC123111229/LOC123103220/LOC123093127/LOC123060166/LOC123098400/LOC123049559/LOC123122682/LOC123044668/LOC123113163/LOC123084953/LOC123041365	13	9	123120509/606323/123111229/123103220/123060166/123122682/123044668/123113163/123041365	4	123093127/123098400/123049559/123084953
BP	GO:0009066	aspartate family amino acid metabolic process	4/1380	35/19183	0.242085	0.728335	123120509/606323/123103220/123060166	LOC123120509/LOC606323/LOC123103220/LOC123060166	4	4	123120509/606323/123103220/123060166	0
BP	GO:0007165	signal transduction	25/1380	299/19183	0.24457	0.728335	123110850/123169796/123097531/123113242/123112101/123080746/123061942/101290612/123079047/123121630/123071241/123157033/123103875/123123764/123052860/123053388/123092290/123062258/123055053/123060620/123144843/123062858/123136971/123056785/123051501	LOC123110850/LOC123169796/LOC123097531/LOC123113242/LOC123112101/LOC123080746/LOC123061942/LOC101290612/LOC123079047/LOC123121630/LOC123071241/LOC123157033/LOC123103875/LOC123123764/LOC123052860/LOC123053388/LOC123092290/LOC123062258/LOC123055053/LOC123060620/LOC123144843/LOC123062858/LOC123136971/LOC123056785/LOC123051501	25	9	123110850/123061942/123079047/123123764/123052860/123092290/123062258/123144843/123056785	16	123169796/123097531/123113242/123112101/123080746/101290612/123121630/123071241/123157033/123103875/123053388/123055053/123060620/123062858/123136971/123051501
BP	GO:0023052	signaling	25/1380	299/19183	0.24457	0.728335	123110850/123169796/123097531/123113242/123112101/123080746/123061942/101290612/123079047/123121630/123071241/123157033/123103875/123123764/123052860/123053388/123092290/123062258/123055053/123060620/123144843/123062858/123136971/123056785/123051501	LOC123110850/LOC123169796/LOC123097531/LOC123113242/LOC123112101/LOC123080746/LOC123061942/LOC101290612/LOC123079047/LOC123121630/LOC123071241/LOC123157033/LOC123103875/LOC123123764/LOC123052860/LOC123053388/LOC123092290/LOC123062258/LOC123055053/LOC123060620/LOC123144843/LOC123062858/LOC123136971/LOC123056785/LOC123051501	25	9	123110850/123061942/123079047/123123764/123052860/123092290/123062258/123144843/123056785	16	123169796/123097531/123113242/123112101/123080746/101290612/123121630/123071241/123157033/123103875/123053388/123055053/123060620/123062858/123136971/123051501
BP	GO:0000096	sulfur amino acid metabolic process	3/1380	24/19183	0.246835	0.731062	123093127/123098400/123084953	LOC123093127/LOC123098400/LOC123084953	3	0		3	123093127/123098400/123084953
BP	GO:0008037	cell recognition	19/1380	226/19183	0.27277	0.781377	123138797/123113145/123190963/123182519/123162825/123047258/123055045/123061459/123186225/123054749/123164824/123062267/123053882/123051180/123047261/123050505/123054748/123060135/123179830	LOC123138797/LOC123113145/LOC123190963/LOC123182519/LOC123162825/LOC123047258/LOC123055045/LOC123061459/LOC123186225/LOC123054749/LOC123164824/LOC123062267/LOC123053882/LOC123051180/LOC123047261/LOC123050505/LOC123054748/LOC123060135/LOC123179830	19	7	123138797/123182519/123061459/123186225/123164824/123062267/123054748	12	123113145/123190963/123162825/123047258/123055045/123054749/123053882/123051180/123047261/123050505/123060135/123179830
BP	GO:0009856	pollination	19/1380	226/19183	0.27277	0.781377	123138797/123113145/123190963/123182519/123162825/123047258/123055045/123061459/123186225/123054749/123164824/123062267/123053882/123051180/123047261/123050505/123054748/123060135/123179830	LOC123138797/LOC123113145/LOC123190963/LOC123182519/LOC123162825/LOC123047258/LOC123055045/LOC123061459/LOC123186225/LOC123054749/LOC123164824/LOC123062267/LOC123053882/LOC123051180/LOC123047261/LOC123050505/LOC123054748/LOC123060135/LOC123179830	19	7	123138797/123182519/123061459/123186225/123164824/123062267/123054748	12	123113145/123190963/123162825/123047258/123055045/123054749/123053882/123051180/123047261/123050505/123060135/123179830
BP	GO:0009875	pollen-pistil interaction	19/1380	226/19183	0.27277	0.781377	123138797/123113145/123190963/123182519/123162825/123047258/123055045/123061459/123186225/123054749/123164824/123062267/123053882/123051180/123047261/123050505/123054748/123060135/123179830	LOC123138797/LOC123113145/LOC123190963/LOC123182519/LOC123162825/LOC123047258/LOC123055045/LOC123061459/LOC123186225/LOC123054749/LOC123164824/LOC123062267/LOC123053882/LOC123051180/LOC123047261/LOC123050505/LOC123054748/LOC123060135/LOC123179830	19	7	123138797/123182519/123061459/123186225/123164824/123062267/123054748	12	123113145/123190963/123162825/123047258/123055045/123054749/123053882/123051180/123047261/123050505/123060135/123179830
BP	GO:0044706	multi-multicellular organism process	19/1380	226/19183	0.27277	0.781377	123138797/123113145/123190963/123182519/123162825/123047258/123055045/123061459/123186225/123054749/123164824/123062267/123053882/123051180/123047261/123050505/123054748/123060135/123179830	LOC123138797/LOC123113145/LOC123190963/LOC123182519/LOC123162825/LOC123047258/LOC123055045/LOC123061459/LOC123186225/LOC123054749/LOC123164824/LOC123062267/LOC123053882/LOC123051180/LOC123047261/LOC123050505/LOC123054748/LOC123060135/LOC123179830	19	7	123138797/123182519/123061459/123186225/123164824/123062267/123054748	12	123113145/123190963/123162825/123047258/123055045/123054749/123053882/123051180/123047261/123050505/123060135/123179830
BP	GO:0048544	recognition of pollen	19/1380	226/19183	0.27277	0.781377	123138797/123113145/123190963/123182519/123162825/123047258/123055045/123061459/123186225/123054749/123164824/123062267/123053882/123051180/123047261/123050505/123054748/123060135/123179830	LOC123138797/LOC123113145/LOC123190963/LOC123182519/LOC123162825/LOC123047258/LOC123055045/LOC123061459/LOC123186225/LOC123054749/LOC123164824/LOC123062267/LOC123053882/LOC123051180/LOC123047261/LOC123050505/LOC123054748/LOC123060135/LOC123179830	19	7	123138797/123182519/123061459/123186225/123164824/123062267/123054748	12	123113145/123190963/123162825/123047258/123055045/123054749/123053882/123051180/123047261/123050505/123060135/123179830
BP	GO:0071804	cellular potassium ion transport	6/1380	61/19183	0.273914	0.781377	123121414/123150115/123166399/123159986/123121696/123141760	LOC123121414/LOC123150115/LOC123166399/LOC123159986/LOC123121696/LOC123141760	6	6	123121414/123150115/123166399/123159986/123121696/123141760	0
BP	GO:0071805	potassium ion transmembrane transport	6/1380	61/19183	0.273914	0.781377	123121414/123150115/123166399/123159986/123121696/123141760	LOC123121414/LOC123150115/LOC123166399/LOC123159986/LOC123121696/LOC123141760	6	6	123121414/123150115/123166399/123159986/123121696/123141760	0
BP	GO:0046434	organophosphate catabolic process	11/1380	125/19183	0.288077	0.814631	123127923/123095662/123189489/123090631/123053591/123070270/123181626/123060930/123167365/123045718/123079738	LOC123127923/LOC123095662/LOC123189489/LOC123090631/LOC123053591/LOC123070270/LOC123181626/LOC123060930/LOC123167365/LOC123045718/LOC123079738	11	6	123189489/123053591/123070270/123060930/123045718/123079738	5	123127923/123095662/123090631/123181626/123167365
BP	GO:0042559	pteridine-containing compound biosynthetic process	2/1380	15/19183	0.29425	0.814631	123106148/123099184	LOC123106148/LOC123099184	2	0		2	123106148/123099184
BP	GO:0045229	external encapsulating structure organization	6/1380	63/19183	0.299274	0.814631	123113352/543124/123055623/123076431/123110820/123119383	LOC123113352/LOC543124/LOC123055623/LOC123076431/LOC123110820/LOC123119383	6	4	123113352/543124/123110820/123119383	2	123055623/123076431
BP	GO:0071555	cell wall organization	6/1380	63/19183	0.299274	0.814631	123113352/543124/123055623/123076431/123110820/123119383	LOC123113352/LOC543124/LOC123055623/LOC123076431/LOC123110820/LOC123119383	6	4	123113352/543124/123110820/123119383	2	123055623/123076431
BP	GO:0046700	heterocycle catabolic process	16/1380	192/19183	0.307113	0.814631	123054895/123144311/123127923/123073776/123095662/123068347/123190737/123189489/123090631/123050333/123053591/123070270/123181626/123167365/123047069/123045718	LOC123054895/LOC123144311/LOC123127923/LOC123073776/LOC123095662/LOC123068347/LOC123190737/LOC123189489/LOC123090631/LOC123050333/LOC123053591/LOC123070270/LOC123181626/LOC123167365/LOC123047069/LOC123045718	16	10	123054895/123073776/123068347/123190737/123189489/123050333/123053591/123070270/123047069/123045718	6	123144311/123127923/123095662/123090631/123181626/123167365
BP	GO:0015908	fatty acid transport	2/1380	16/19183	0.321557	0.814631	123100061/123090827	LOC123100061/LOC123090827	2	1	123100061	1	123090827
BP	GO:0015909	long-chain fatty acid transport	2/1380	16/19183	0.321557	0.814631	123100061/123090827	LOC123100061/LOC123090827	2	1	123100061	1	123090827
BP	GO:0032309	icosanoid secretion	2/1380	16/19183	0.321557	0.814631	123100061/123090827	LOC123100061/LOC123090827	2	1	123100061	1	123090827
BP	GO:0046717	acid secretion	2/1380	16/19183	0.321557	0.814631	123100061/123090827	LOC123100061/LOC123090827	2	1	123100061	1	123090827
BP	GO:0050482	arachidonic acid secretion	2/1380	16/19183	0.321557	0.814631	123100061/123090827	LOC123100061/LOC123090827	2	1	123100061	1	123090827
BP	GO:0071715	icosanoid transport	2/1380	16/19183	0.321557	0.814631	123100061/123090827	LOC123100061/LOC123090827	2	1	123100061	1	123090827
BP	GO:1901571	fatty acid derivative transport	2/1380	16/19183	0.321557	0.814631	123100061/123090827	LOC123100061/LOC123090827	2	1	123100061	1	123090827
BP	GO:1903963	arachidonate transport	2/1380	16/19183	0.321557	0.814631	123100061/123090827	LOC123100061/LOC123090827	2	1	123100061	1	123090827
BP	GO:0006096	glycolytic process	9/1380	103/19183	0.322288	0.814631	123127923/123095662/123189489/123090631/123053591/123070270/123181626/123167365/123045718	LOC123127923/LOC123095662/LOC123189489/LOC123090631/LOC123053591/LOC123070270/LOC123181626/LOC123167365/LOC123045718	9	4	123189489/123053591/123070270/123045718	5	123127923/123095662/123090631/123181626/123167365
BP	GO:0006165	nucleoside diphosphate phosphorylation	9/1380	103/19183	0.322288	0.814631	123127923/123095662/123189489/123090631/123053591/123070270/123181626/123167365/123045718	LOC123127923/LOC123095662/LOC123189489/LOC123090631/LOC123053591/LOC123070270/LOC123181626/LOC123167365/LOC123045718	9	4	123189489/123053591/123070270/123045718	5	123127923/123095662/123090631/123181626/123167365
BP	GO:0006757	ATP generation from ADP	9/1380	103/19183	0.322288	0.814631	123127923/123095662/123189489/123090631/123053591/123070270/123181626/123167365/123045718	LOC123127923/LOC123095662/LOC123189489/LOC123090631/LOC123053591/LOC123070270/LOC123181626/LOC123167365/LOC123045718	9	4	123189489/123053591/123070270/123045718	5	123127923/123095662/123090631/123181626/123167365
BP	GO:0009132	nucleoside diphosphate metabolic process	9/1380	103/19183	0.322288	0.814631	123127923/123095662/123189489/123090631/123053591/123070270/123181626/123167365/123045718	LOC123127923/LOC123095662/LOC123189489/LOC123090631/LOC123053591/LOC123070270/LOC123181626/LOC123167365/LOC123045718	9	4	123189489/123053591/123070270/123045718	5	123127923/123095662/123090631/123181626/123167365
BP	GO:0009135	purine nucleoside diphosphate metabolic process	9/1380	103/19183	0.322288	0.814631	123127923/123095662/123189489/123090631/123053591/123070270/123181626/123167365/123045718	LOC123127923/LOC123095662/LOC123189489/LOC123090631/LOC123053591/LOC123070270/LOC123181626/LOC123167365/LOC123045718	9	4	123189489/123053591/123070270/123045718	5	123127923/123095662/123090631/123181626/123167365
BP	GO:0009179	purine ribonucleoside diphosphate metabolic process	9/1380	103/19183	0.322288	0.814631	123127923/123095662/123189489/123090631/123053591/123070270/123181626/123167365/123045718	LOC123127923/LOC123095662/LOC123189489/LOC123090631/LOC123053591/LOC123070270/LOC123181626/LOC123167365/LOC123045718	9	4	123189489/123053591/123070270/123045718	5	123127923/123095662/123090631/123181626/123167365
BP	GO:0009185	ribonucleoside diphosphate metabolic process	9/1380	103/19183	0.322288	0.814631	123127923/123095662/123189489/123090631/123053591/123070270/123181626/123167365/123045718	LOC123127923/LOC123095662/LOC123189489/LOC123090631/LOC123053591/LOC123070270/LOC123181626/LOC123167365/LOC123045718	9	4	123189489/123053591/123070270/123045718	5	123127923/123095662/123090631/123181626/123167365
BP	GO:0042866	pyruvate biosynthetic process	9/1380	103/19183	0.322288	0.814631	123127923/123095662/123189489/123090631/123053591/123070270/123181626/123167365/123045718	LOC123127923/LOC123095662/LOC123189489/LOC123090631/LOC123053591/LOC123070270/LOC123181626/LOC123167365/LOC123045718	9	4	123189489/123053591/123070270/123045718	5	123127923/123095662/123090631/123181626/123167365
BP	GO:0046031	ADP metabolic process	9/1380	103/19183	0.322288	0.814631	123127923/123095662/123189489/123090631/123053591/123070270/123181626/123167365/123045718	LOC123127923/LOC123095662/LOC123189489/LOC123090631/LOC123053591/LOC123070270/LOC123181626/LOC123167365/LOC123045718	9	4	123189489/123053591/123070270/123045718	5	123127923/123095662/123090631/123181626/123167365
BP	GO:0046939	nucleotide phosphorylation	9/1380	103/19183	0.322288	0.814631	123127923/123095662/123189489/123090631/123053591/123070270/123181626/123167365/123045718	LOC123127923/LOC123095662/LOC123189489/LOC123090631/LOC123053591/LOC123070270/LOC123181626/LOC123167365/LOC123045718	9	4	123189489/123053591/123070270/123045718	5	123127923/123095662/123090631/123181626/123167365
BP	GO:0019220	regulation of phosphate metabolic process	3/1380	28/19183	0.3272	0.814631	123042223/123050156/123186205	LOC123042223/LOC123050156/LOC123186205	3	0		3	123042223/123050156/123186205
BP	GO:0031399	regulation of protein modification process	3/1380	28/19183	0.3272	0.814631	123042223/123050156/123186205	LOC123042223/LOC123050156/LOC123186205	3	0		3	123042223/123050156/123186205
BP	GO:0051174	regulation of phosphorus metabolic process	3/1380	28/19183	0.3272	0.814631	123042223/123050156/123186205	LOC123042223/LOC123050156/LOC123186205	3	0		3	123042223/123050156/123186205
BP	GO:0019439	aromatic compound catabolic process	16/1380	195/19183	0.329159	0.814631	123054895/123144311/123127923/123073776/123095662/123068347/123190737/123189489/123090631/123050333/123053591/123070270/123181626/123167365/123047069/123045718	LOC123054895/LOC123144311/LOC123127923/LOC123073776/LOC123095662/LOC123068347/LOC123190737/LOC123189489/LOC123090631/LOC123050333/LOC123053591/LOC123070270/LOC123181626/LOC123167365/LOC123047069/LOC123045718	16	10	123054895/123073776/123068347/123190737/123189489/123050333/123053591/123070270/123047069/123045718	6	123144311/123127923/123095662/123090631/123181626/123167365
BP	GO:0044270	cellular nitrogen compound catabolic process	16/1380	195/19183	0.329159	0.814631	123054895/123144311/123127923/123073776/123095662/123068347/123190737/123189489/123090631/123050333/123053591/123070270/123181626/123167365/123047069/123045718	LOC123054895/LOC123144311/LOC123127923/LOC123073776/LOC123095662/LOC123068347/LOC123190737/LOC123189489/LOC123090631/LOC123050333/LOC123053591/LOC123070270/LOC123181626/LOC123167365/LOC123047069/LOC123045718	16	10	123054895/123073776/123068347/123190737/123189489/123050333/123053591/123070270/123047069/123045718	6	123144311/123127923/123095662/123090631/123181626/123167365
BP	GO:1901361	organic cyclic compound catabolic process	16/1380	195/19183	0.329159	0.814631	123054895/123144311/123127923/123073776/123095662/123068347/123190737/123189489/123090631/123050333/123053591/123070270/123181626/123167365/123047069/123045718	LOC123054895/LOC123144311/LOC123127923/LOC123073776/LOC123095662/LOC123068347/LOC123190737/LOC123189489/LOC123090631/LOC123050333/LOC123053591/LOC123070270/LOC123181626/LOC123167365/LOC123047069/LOC123045718	16	10	123054895/123073776/123068347/123190737/123189489/123050333/123053591/123070270/123047069/123045718	6	123144311/123127923/123095662/123090631/123181626/123167365
BP	GO:0019362	pyridine nucleotide metabolic process	12/1380	144/19183	0.341483	0.828667	123127923/123095662/123064785/123182795/123189489/123090631/123053591/123070270/123181626/123167365/123063491/123045718	LOC123127923/LOC123095662/LOC123064785/LOC123182795/LOC123189489/LOC123090631/LOC123053591/LOC123070270/LOC123181626/LOC123167365/LOC123063491/LOC123045718	12	5	123189489/123053591/123070270/123063491/123045718	7	123127923/123095662/123064785/123182795/123090631/123181626/123167365
BP	GO:0046496	nicotinamide nucleotide metabolic process	12/1380	144/19183	0.341483	0.828667	123127923/123095662/123064785/123182795/123189489/123090631/123053591/123070270/123181626/123167365/123063491/123045718	LOC123127923/LOC123095662/LOC123064785/LOC123182795/LOC123189489/LOC123090631/LOC123053591/LOC123070270/LOC123181626/LOC123167365/LOC123063491/LOC123045718	12	5	123189489/123053591/123070270/123063491/123045718	7	123127923/123095662/123064785/123182795/123090631/123181626/123167365
BP	GO:0009166	nucleotide catabolic process	9/1380	105/19183	0.342791	0.828667	123127923/123095662/123189489/123090631/123053591/123070270/123181626/123167365/123045718	LOC123127923/LOC123095662/LOC123189489/LOC123090631/LOC123053591/LOC123070270/LOC123181626/LOC123167365/LOC123045718	9	4	123189489/123053591/123070270/123045718	5	123127923/123095662/123090631/123181626/123167365
BP	GO:0006074	(1->3)-beta-D-glucan metabolic process	3/1380	29/19183	0.347416	0.828667	123046969/123069878/123078310	LOC123046969/LOC123069878/LOC123078310	3	3	123046969/123069878/123078310	0
[truncated: 737 more rows]

## Sheet: CWI44183_all_GOenrich
Table S3 Detailed information on GO enrichment and KEGG pathway annotations for differentially expressed genes (DEGs) in CWI44398, CWI78968, and CWI44183
[truncated: 820 more rows]

[truncated: 3 more sheets: CWI44398_all_KEGGenrich, CWI78968_all_KEGGenrich, CWI44183_all_KEGGenrich]
