# Supplementary material
Source: Research Square preprint supplement (doi:10.21203/rs.3.rs-9250361/v1)
Supplement: Supplementary file 3 [file 9a1a90a1bb72dc4b9a0135c6.xlsx]

## Sheet: CWI44398_deg_all
Table S2 Differentially expressed genes (DEGs) between the Treatment and CK of CWI44398, CWI78968, and CWI44183
gene_id	CWI44398_Trtment_1	CWI44398_Trtment_2	CWI44398_Trtment_3	CWI44398_CK_1	CWI44398_CK_2	CWI44398_CK_3	CWI44398_Trtment	CWI44398_CK	log2FoldChange	pvalue	padj	gene_name	gene_chr	gene_start	gene_end	gene_strand	gene_length	gene_biotype	gene_description	Family
123092719	8563.76	7061.85	4973.75	57.7555	50.7094	49.7093	6866.45	52.7247	7.0256	3.4e-135	2.6e-130	LOC123092719	NC_057804.1	462485939	462491199	+	2506	protein_coding	phosphoenolpyruvate carboxykinase (ATP)-like && sp|Q9SLZ0|PCKA_MAIZE Phosphoenolpyruvate carboxykinase (ATP) OS=Zea mays OX=4577 PE=2 SV=1 && PF01293:Phosphoenolpyruvate carboxykinase	VOZ
123128885	104.539	65.4308	71.11	2094.4	2427.09	2360.72	80.36	2294.07	-4.83869	7.97e-79	3.05e-74	LOC123128885	NC_057809.1	600097262	600098628	+	665	protein_coding	photosystem II 10 kDa polypeptide%2C chloroplastic && sp|Q40070|PSBR_HORVU Photosystem II 10 kDa polypeptide, chloroplastic OS=Hordeum vulgare OX=4513 GN=PSBR PE=3 SV=1 && PF04725:Photosystem II 10 kDa polypeptide PsbR	-
123191236	8276.54	11372.8	5383.62	35.4639	31.8177	86.2878	8344.32	51.1898	7.34539	6.52e-77	1.66e-72	LOC123191236	NC_057797.1	785369041	785373362	+	2695	lncRNA	uncharacterized LOC123191236 && - && -	-
123098016	9260.69	7773.18	4610.3	175.293	150.14	88.1637	7214.72	137.865	5.71065	2.91e-65	5.56e-61	LOC123098016	NC_057805.1	375683512	375689888	+	2610	protein_coding	phosphoenolpyruvate carboxykinase (ATP)-like && sp|Q9SLZ0|PCKA_MAIZE Phosphoenolpyruvate carboxykinase (ATP) OS=Zea mays OX=4577 PE=2 SV=1 && PF01293:Phosphoenolpyruvate carboxykinase	VOZ
123100730	14.7833	18.6945	13.8269	726.503	935.638	594.636	15.7683	752.259	-5.57227	8.15e-59	1.25e-54	LOC123100730	NC_057805.1	511720441	511722599	+	1487	protein_coding	metacaspase-1-like && sp|Q7XJE6|MCA1_ARATH Metacaspase-1 OS=Arabidopsis thaliana OX=3702 GN=AMC1 PE=1 SV=1 && PF00656:Caspase domain	LBD
123110791	3376.93	3539.81	3367.85	368.825	394.738	436.129	3428.19	399.897	3.09949	5.63e-55	7.19e-51	LOC123110791	NC_057807.1	130636172	130641590	+	2708	protein_coding	F-box/LRR-repeat protein 3-like%2C transcript variant X1 && - && -	WRKY
123146030	3635.64	2285.41	3218.71	35324.1	40285.2	39684	3046.59	38431.1	-3.65711	5.06e-53	5.54e-49	LOC123146030	NC_057811.1	473165859	473166937	-	673	protein_coding	photosystem II 10 kDa polypeptide%2C chloroplastic-like && sp|Q40070|PSBR_HORVU Photosystem II 10 kDa polypeptide, chloroplastic OS=Hordeum vulgare OX=4513 GN=PSBR PE=3 SV=1 && PF04725:Photosystem II 10 kDa polypeptide PsbR	-
123148217	5366.34	5041.91	2312.06	49.6495	118.322	98.4807	4240.11	88.8174	5.5764	3.53e-48	3.38e-44	LOC123148217	NC_057812.1	558401600	558406475	-	2229	protein_coding	polyamine oxidase 6-like && sp|O64411|PAO1_MAIZE Polyamine oxidase 1 OS=Zea mays OX=4577 GN=MPAO1 PE=1 SV=1 && PF01593:Flavin containing amine oxidoreductase	bHLH
123069564	17743.1	9894.07	11668.9	804.524	976.405	790.659	13102.1	857.196	3.93403	8.92e-48	7.59e-44	LOC123069564	NC_057801.1	251333701	251334436	-	736	protein_coding	late embryogenis abundant protein 41-like && - && -	-
123145848	2033.76	554.293	3481.42	6.07953	10.9373	9.37911	2023.16	8.79865	7.84323	5.67e-44	4.35e-40	LOC123145848	NC_057811.1	457116219	457117149	+	810	protein_coding	dehydrin DHN3-like && sp|P12948|DHN3_HORVU Dehydrin DHN3 OS=Hordeum vulgare OX=4513 GN=DHN3 PE=2 SV=1 && PF00257:Dehydrin	-
123080089	956.692	859.013	957.021	41.5434	65.624	78.7846	924.242	61.984	3.89567	4.2e-43	2.92e-39	LOC123080089	NC_057802.1	512129713	512134485	-	1309	protein_coding	noroxomaritidine/norcraugsodine reductase-like && sp|A0A1C9II22|NR_NARAP Noroxomaritidine/norcraugsodine reductase OS=Narcissus aff. pseudonarcissus MK-2014 OX=1540222 GN=NR PE=1 SV=1 && PF13561:Enoyl-(Acyl carrier protein) reductase	C2H2
123060630	39.0702	57.0183	49.3819	751.835	1035.07	662.165	48.4901	816.356	-4.0703	1.39e-42	8.9e-39	LOC123060630	NC_057800.1	125586499	125590404	+	3407	protein_coding	phosphoenolpyruvate carboxylase 1-like && sp|P29195|CAPP1_SORBI Phosphoenolpyruvate carboxylase 1 OS=Sorghum bicolor OX=4558 GN=PEPC PE=2 SV=1 && PF00311:Phosphoenolpyruvate carboxylase	-
123145845	7078.04	2486.37	10505.5	55.729	133.237	77.8466	6689.97	88.9374	6.23305	2.15e-42	1.27e-38	LOC123145845	NC_057811.1	457078083	457079061	+	861	protein_coding	dehydrin DHN3 && sp|P12948|DHN3_HORVU Dehydrin DHN3 OS=Hordeum vulgare OX=4513 GN=DHN3 PE=2 SV=1 && PF00257:Dehydrin	-
123062592	3748.63	2931.3	8640.85	114.498	111.362	189.458	5106.92	138.439	5.20441	4.61e-39	2.52e-35	LOC123062592	NC_057800.1	612306188	612312702	+	2759	protein_coding	delta-1-pyrroline-5-carboxylate synthase 2 && sp|Q941T1|P5CS2_ORYSJ Delta-1-pyrroline-5-carboxylate synthase 2 OS=Oryza sativa subsp. japonica OX=39947 GN=P5CS2 PE=2 SV=1 && PF00696:Amino acid kinase family|PF00171:Aldehyde dehydrogenase family	B3
123134796	1105.58	1039.42	862.208	59.782	103.407	64.7159	1002.4	75.9684	3.7223	9.15e-39	4.67e-35	LOC123134796	NC_057810.1	672504986	672508670	+	1600	protein_coding	purple acid phosphatase 2-like && sp|Q9SDZ9|PPAF2_IPOBA Purple acid phosphatase 2 OS=Ipomoea batatas OX=4120 GN=PAP2 PE=1 SV=1 && PF16656:Purple acid Phosphatase, N-terminal domain|PF00149:Calcineurin-like phosphoesterase|PF14008:Iron/zinc purple acid phosphatase-like protein C	SRS
123189950	1190.06	1032.87	966.898	138.816	126.276	144.438	1063.28	136.51	2.96105	1.58e-38	7.59e-35	LOC123189950	NC_057797.1	642411702	642416463	-	1775	protein_coding	glutamate dehydrogenase 2%2C mitochondrial-like && sp|A2XW22|DHE2_ORYSI Glutamate dehydrogenase 2, mitochondrial OS=Oryza sativa subsp. indica OX=39946 GN=GDH2 PE=3 SV=1 && PF02812:Glu/Leu/Phe/Val dehydrogenase, dimerisation domain|PF00208:Glutamate/Leucine/Phenylalanine/Valine dehydrogenase	-
123085323	11816.1	6723.48	4253.76	427.593	300.279	283.249	7597.78	337.041	4.49477	4.55e-36	2.05e-32	LOC123085323	NC_057803.1	88475071	88480139	-	2569	protein_coding	phosphoenolpyruvate carboxykinase (ATP)-like%2C transcript variant X1 && sp|Q9SLZ0|PCKA_MAIZE Phosphoenolpyruvate carboxykinase (ATP) OS=Zea mays OX=4577 PE=2 SV=1 && PF01293:Phosphoenolpyruvate carboxykinase	VOZ
123054077	1029.55	893.598	1318.5	101.325	88.4929	124.742	1080.55	104.854	3.36433	5.13e-36	2.18e-32	LOC123054077	NC_057799.1	497256559	497261950	+	1924	protein_coding	glutamate dehydrogenase 2%2C mitochondrial && sp|A2XW22|DHE2_ORYSI Glutamate dehydrogenase 2, mitochondrial OS=Oryza sativa subsp. indica OX=39946 GN=GDH2 PE=3 SV=1 && PF00208:Glutamate/Leucine/Phenylalanine/Valine dehydrogenase|PF02812:Glu/Leu/Phe/Val dehydrogenase, dimerisation domain	-
123091300	12868.9	15681	12801.8	1241.24	2048.26	1721.07	13783.9	1670.19	3.04486	4.35e-34	1.75e-30	LOC123091300	NC_057804.1	104729711	104732967	+	1538	protein_coding	very-long-chain aldehyde decarbonylase GL1-10-like && sp|Q9AV39|GLO1A_ORYSJ Very-long-chain aldehyde decarbonylase GL1-10 OS=Oryza sativa subsp. japonica OX=39947 GN=GL1-10 PE=2 SV=1 && PF04116:Fatty acid hydroxylase superfamily	-
123139414	4995.7	3794.05	4048.33	23717.2	28980.9	31150.9	4279.36	27949.7	-2.70742	6.03e-34	2.31e-30	LOC123139414	NC_057810.1	694939897	694941004	+	763	protein_coding	photosystem II 10 kDa polypeptide%2C chloroplastic-like%2C transcript variant X1 && sp|Q40070|PSBR_HORVU Photosystem II 10 kDa polypeptide, chloroplastic OS=Hordeum vulgare OX=4513 GN=PSBR PE=3 SV=1 && PF04725:Photosystem II 10 kDa polypeptide PsbR	-
123072845	342.128	257.984	451.351	7.09278	5.96581	15.0066	350.488	9.35506	5.21657	2.11e-33	7.68e-30	LOC123072845	NC_057801.1	841001709	841006400	-	1828	protein_coding	vacuolar-processing enzyme-like && sp|Q39119|VPEG_ARATH Vacuolar-processing enzyme gamma-isozyme OS=Arabidopsis thaliana OX=3702 GN=At4g32940 PE=1 SV=2 && PF01650:Peptidase C13 family	-
123078053	15488.7	9508.97	9693.67	982.857	1349.27	1329.02	11563.8	1220.38	3.24412	8.1e-33	2.82e-29	LOC123078053	NC_057802.1	163712189	163712944	-	756	protein_coding	late embryogenesis abundant protein Lea5-like && - && -	-
123055404	493.129	608.507	660.73	67.888	65.624	72.2192	587.455	68.5771	3.09852	8.94e-33	2.98e-29	LOC123055404	NC_057799.1	652487773	652492939	-	2614	lncRNA	uncharacterized LOC123055404 && - && -	-
123172252	50.6856	33.6501	27.6539	699.145	430.533	565.561	37.3299	565.08	-3.92415	1.87e-32	5.98e-29	LOC123172252	NW_025225549.1	31104	36812	-	2275	protein_coding	amino acid transporter AVT1C-like && sp|F4IUW3|AVT1C_ARATH Amino acid transporter AVT1C OS=Arabidopsis thaliana OX=3702 GN=AVT1C PE=1 SV=1 && PF01490:Transmembrane amino acid transporter protein	-
123051568	4.2238	6.54308	11.8517	290.804	465.333	252.298	7.53951	336.145	-5.47199	3.06e-32	9.39e-29	LOC123051568	NC_057799.1	62624911	62626366	-	1255	protein_coding	peroxidase 2-like && sp|A2YPX3|PER2_ORYSI Peroxidase 2 OS=Oryza sativa subsp. indica OX=39946 GN=PRX112 PE=3 SV=2 && PF00141:Peroxidase	NAC
123117018	2562.79	2155.48	2099.72	94.2326	80.5385	211.968	2272.66	128.913	4.13821	3.94e-32	1.16e-28	LOC123117018	NC_057807.1	583600617	583602090	+	987	protein_coding	chitinase 8-like && sp|Q7XCK6|CHI8_ORYSJ Chitinase 8 OS=Oryza sativa subsp. japonica OX=39947 GN=Cht8 PE=2 SV=1 && PF00182:Chitinase class I	NAC
123079164	564.934	553.358	989.614	44.5832	51.7037	54.3989	702.635	50.2286	3.80544	4.19e-32	1.19e-28	LOC123079164	NC_057802.1	398428396	398432941	-	2778	protein_coding	probable sulfate transporter 3.5%2C transcript variant X1 && sp|Q94LW6|SUT35_ARATH Probable sulfate transporter 3.5 OS=Arabidopsis thaliana OX=3702 GN=SULTR3;5 PE=2 SV=1 && PF00916:Sulfate permease family|PF01740:STAS domain	MIKC_MADS
543388	3797.2	2884.56	3368.83	0	0	0	3350.2	0	14.1799	4.61e-32	1.26e-28	LOC543388	NC_057805.1	455544796	455549154	-	1809	protein_coding	ALMT1%2C transcript variant X1 && sp|Q76LB1|ALMT1_WHEAT Aluminum-activated malate transporter 1 OS=Triticum aestivum OX=4565 GN=ALMT1 PE=1 SV=1 && PF11744:Aluminium activated malate transporter	-
123191122	928.181	576.726	775.296	78.0206	67.6126	47.8335	760.068	64.4889	3.56061	6.46e-32	1.71e-28	LOC123191122	NC_057797.1	773100469	773102666	-	2079	protein_coding	oxalate--CoA ligase-like && sp|Q9SMT7|4CLLA_ARATH Oxalate--CoA ligase OS=Arabidopsis thaliana OX=3702 GN=AAE3 PE=1 SV=1 && PF00501:AMP-binding enzyme|PF13193:AMP-binding enzyme C-terminal domain	NAC
100859956	82.3642	123.384	168.886	1322.3	1180.24	1367.47	124.878	1290	-3.36745	2.4e-31	6.14e-28	LOC100859956	NC_057801.1	845043906	845045540	-	1635	protein_coding	myb-related protein MYBAS2 && sp|Q4JL76|MYBA2_ORYSJ Myb-related protein MYBAS2 OS=Oryza sativa subsp. japonica OX=39947 GN=MYBAS2 PE=2 SV=1 && -	MYB
123071410	3089.71	2407.85	11298.6	92.2061	117.328	140.687	5598.72	116.74	5.58334	2.93e-31	7.23e-28	LOC123071410	NC_057801.1	638753842	638760229	+	2623	protein_coding	delta-1-pyrroline-5-carboxylate synthase 2-like && sp|Q941T1|P5CS2_ORYSJ Delta-1-pyrroline-5-carboxylate synthase 2 OS=Oryza sativa subsp. japonica OX=39947 GN=P5CS2 PE=2 SV=1 && PF00696:Amino acid kinase family|PF00171:Aldehyde dehydrogenase family	B3
123046199	504.745	586.073	560.979	40.5302	70.5955	45.0197	550.599	52.0485	3.40369	3.09e-31	7.39e-28	LOC123046199	NC_057798.1	590691893	590697009	+	1793	protein_coding	glutamate dehydrogenase 2%2C mitochondrial && sp|A2XW22|DHE2_ORYSI Glutamate dehydrogenase 2, mitochondrial OS=Oryza sativa subsp. indica OX=39946 GN=GDH2 PE=3 SV=1 && PF00208:Glutamate/Leucine/Phenylalanine/Valine dehydrogenase|PF02812:Glu/Leu/Phe/Val dehydrogenase, dimerisation domain	-
123121414	1025.33	1137.56	1284.92	203.664	175.992	190.396	1149.27	190.017	2.59668	5.52e-31	1.28e-27	LOC123121414	NC_057808.1	312822493	312827115	-	2965	protein_coding	potassium transporter 23-like && sp|Q6H4R6|HAK23_ORYSJ Potassium transporter 23 OS=Oryza sativa subsp. japonica OX=39947 GN=HAK23 PE=2 SV=1 && PF02705:K+ potassium transporter	C3H
123130233	1101.36	691.697	1259.24	75.9941	105.396	96.6049	1017.43	92.665	3.45616	1.66e-30	3.75e-27	LOC123130233	NC_057809.1	51122998	51123865	-	868	pseudogene	- && - && PF04450:Peptidase of plants and bacteria	-
123119787	2041.15	1818.98	1945.65	388.076	313.205	386.419	1935.26	362.567	2.41606	5.93e-30	1.3e-26	LOC123119787	NC_057808.1	117716639	117722077	-	2791	protein_coding	F-box/LRR-repeat protein 3-like%2C transcript variant X2 && - && -	WRKY
123151777	244.981	238.355	254.811	19.2518	10.9373	14.0687	246.049	14.7526	4.06206	6.22e-30	1.32e-26	LOC123151777	NC_057812.1	41930069	41934974	+	2195	lncRNA	uncharacterized LOC123151777%2C transcript variant X4 && - && -	-
123121634	253.428	278.548	262.712	9.11929	7.95442	0	264.896	5.69124	5.56337	1.97e-29	4.08e-26	LOC123121634	NC_057808.1	343078910	343080587	+	1348	protein_coding	WRKY transcription factor WRKY76-like%2C transcript variant X1 && sp|Q6IEK5|WRK76_ORYSI WRKY transcription factor WRKY76 OS=Oryza sativa subsp. indica OX=39946 GN=WRKY76 PE=2 SV=1 && PF03106:WRKY DNA -binding domain	WRKY
novel.3129	605.06	702.914	591.595	68.9013	95.453	94.729	633.19	86.3611	2.87336	8.47e-29	1.71e-25	-	NC_057813.1	208072093	208074571	-	2296	-	- && - && -	-
123055296	542.759	416.888	566.904	59.782	64.6296	67.5296	508.85	63.9804	2.99068	9.52e-29	1.87e-25	LOC123055296	NC_057799.1	642810952	642813107	-	2060	protein_coding	oxalate--CoA ligase-like && sp|Q9SMT7|4CLLA_ARATH Oxalate--CoA ligase OS=Arabidopsis thaliana OX=3702 GN=AAE3 PE=1 SV=1 && PF00501:AMP-binding enzyme|PF13193:AMP-binding enzyme C-terminal domain	NAC
123191268	5537.41	4840.95	4552.02	24902.7	29412.5	22303.5	4976.79	25539.6	-2.35947	1.65e-28	3.16e-25	LOC123191268	NC_057797.1	787559225	787563561	+	1762	protein_coding	uncharacterized LOC123191268 && - && PF07468:Agglutinin domain|PF01117:Aerolysin toxin	-
123045001	553.318	1091.76	841.468	6469.63	6661.83	6682.62	828.849	6604.69	-2.99389	5.79e-28	1.08e-24	LOC123045001	NC_057798.1	375501557	375507450	+	3690	lncRNA	uncharacterized LOC123045001%2C transcript variant X1 && sp|Q40070|PSBR_HORVU Photosystem II 10 kDa polypeptide, chloroplastic OS=Hordeum vulgare OX=4513 GN=PSBR PE=3 SV=1 && -	-
123079750	2056.99	1404.89	6210.27	57.7555	84.5157	123.804	3224.05	88.6918	5.183	2.93e-27	5.33e-24	LOC123079750	NC_057802.1	470249828	470256448	+	2599	protein_coding	delta-1-pyrroline-5-carboxylate synthase 2-like && sp|Q941T1|P5CS2_ORYSJ Delta-1-pyrroline-5-carboxylate synthase 2 OS=Oryza sativa subsp. japonica OX=39947 GN=P5CS2 PE=2 SV=1 && PF00696:Amino acid kinase family|PF00171:Aldehyde dehydrogenase family	B3
123181337	298.834	312.198	1293.81	5.06627	9.94302	8.4412	634.946	7.81683	6.34175	4.13e-27	7.36e-24	LOC123181337	NC_057796.1	257355366	257358869	-	1696	protein_coding	methionine gamma-lyase-like && sp|Q9SGU9|MGL_ARATH Methionine gamma-lyase OS=Arabidopsis thaliana OX=3702 GN=MGL PE=1 SV=1 && PF01053:Cys/Met metabolism PLP-dependent enzyme	-
123105925	234.421	234.616	209.379	20.2651	17.8974	17.8203	226.139	18.6609	3.60012	7.47e-27	1.26e-23	LOC123105925	NC_057806.1	678966793	678969756	-	1603	protein_coding	probable polygalacturonase && sp|A7PZL3|PGLR_VITVI Probable polygalacturonase OS=Vitis vinifera OX=29760 GN=GSVIVT00026920001 PE=1 SV=1 && PF00295:Glycosyl hydrolases family 28	MYB_related
123182085	16.8952	21.4987	17.7775	415.434	215.764	302.007	18.7238	311.068	-4.05121	7.5e-27	1.26e-23	LOC123182085	NC_057796.1	362718376	362721898	+	2237	protein_coding	amino acid permease 3-like%2C transcript variant X1 && sp|Q39134|AAP3_ARATH Amino acid permease 3 OS=Arabidopsis thaliana OX=3702 GN=AAP3 PE=1 SV=2 && PF01490:Transmembrane amino acid transporter protein	MYB_related
123167188	128.826	75.7128	72.0976	1277.71	1379.1	732.509	92.2121	1129.77	-3.617	7.57e-27	1.26e-23	LOC123167188	NC_057814.1	58612193	58613822	+	1331	protein_coding	GDSL esterase/lipase APG-like && sp|Q9LU14|APG2_ARATH GDSL esterase/lipase APG OS=Arabidopsis thaliana OX=3702 GN=APG PE=2 SV=1 && PF00657:GDSL-like Lipase/Acylhydrolase	ERF
123085061	838.425	214.987	272.588	6.07953	6.96012	6.56538	442	6.53501	6.07874	1.67e-26	2.73e-23	LOC123085061	NC_057803.1	46562527	46563163	+	637	protein_coding	uncharacterized LOC123085061 && - && -	-
123121102	29844.3	15668.8	9709.47	756.901	1388.05	637.78	18407.5	927.576	4.31074	3.52e-26	5.61e-23	LOC123121102	NC_057795.1	308386926	308390760	+	1044	protein_coding	ribonuclease 1-like && sp|P80022|RNLE_SOLLC Extracellular ribonuclease LE OS=Solanum lycopersicum OX=4081 PE=1 SV=2 && PF00445:Ribonuclease T2 family	bZIP
123081843	459.339	539.337	470.116	2285.9	2203.37	2841.87	489.597	2443.72	-2.3192	4.19e-26	6.55e-23	LOC123081843	NC_057803.1	114054538	114055689	+	885	protein_coding	uncharacterized LOC123081843 && - && PF09713:Plant protein 1589 of unknown function (A_thal_3526)	-
123115670	536.423	988.94	173.824	11.1458	2.98291	6.56538	566.396	6.89803	6.36266	4.99e-26	7.64e-23	LOC123115670	NC_057807.1	59476701	59477891	+	516	lncRNA	uncharacterized LOC123115670 && - && -	-
123154190	1085.52	1031.94	1399.48	197.585	221.729	213.844	1172.31	211.053	2.47356	5.87e-26	8.82e-23	LOC123154190	NC_057812.1	321470616	321474230	+	3372	lncRNA	uncharacterized LOC123154190 && - && -	-
123074430	859.544	610.376	729.865	46.6097	99.4302	74.095	733.262	73.3783	3.32007	7.53e-26	1.11e-22	LOC123074430	NC_057802.1	163474524	163475293	-	770	protein_coding	late embryogenis abundant protein 41-like && - && -	-
123043400	966.195	1114.19	713.075	6915.46	5235	5258.87	931.154	5803.11	-2.63963	1.18e-25	1.7e-22	LOC123043400	NC_057798.1	50585320	50586777	-	843	protein_coding	ribulose bisphosphate carboxylase small subunit%2C chloroplastic 2-like && sp|P26667|RBS2_WHEAT Ribulose bisphosphate carboxylase small subunit, chloroplastic 2 OS=Triticum aestivum OX=4565 GN=RBCS2 PE=3 SV=1 && PF12338:Ribulose-1,5-bisphosphate carboxylase small subunit|PF00101:Ribulose bisphosphate carboxylase, small chain	M-type_MADS
123180127	675.809	611.311	155.059	6.07953	11.9316	11.2549	480.726	9.75536	5.6198	2.22e-25	3.15e-22	LOC123180127	NC_057796.1	37397149	37398777	-	1313	protein_coding	UPF0014 membrane protein STAR2-like && sp|Q5W7C1|STAR2_ORYSJ UPF0014 membrane protein STAR2 OS=Oryza sativa subsp. japonica OX=39947 GN=STAR2 PE=1 SV=1 && PF03649:Uncharacterised protein family (UPF0014)	-
123050070	506.856	332.762	171.849	5.06627	12.9259	3.75165	337.156	7.24795	5.54476	2.34e-25	3.26e-22	LOC123050070	NC_057799.1	575642942	575643772	-	831	protein_coding	pectinesterase inhibitor 8-like && sp|Q6ETW4|PMEI8_ORYSJ Pectinesterase inhibitor 8 OS=Oryza sativa subsp. japonica OX=39947 GN=PMEI8 PE=2 SV=1 && PF04043:Plant invertase/pectin methylesterase inhibitor	-
123061745	673.697	416.888	502.708	51.676	72.5841	59.0884	531.097	61.1161	3.11877	2.82e-25	3.86e-22	LOC123061745	NC_057800.1	481206028	481207851	+	1824	protein_coding	polyamine oxidase 1-like && sp|Q5NAI7|PAO1_ORYSJ Polyamine oxidase 1 OS=Oryza sativa subsp. japonica OX=39947 GN=PAO1 PE=1 SV=1 && PF01593:Flavin containing amine oxidoreductase	bHLH
123148626	48.5737	27.1071	49.3819	365.785	506.1	394.861	41.6876	422.248	-3.34442	3.55e-25	4.77e-22	LOC123148626	NC_057795.1	679751511	679754584	+	1504	protein_coding	probable protein ABIL4%2C transcript variant X1 && sp|Q6I588|ABIL4_ORYSJ Probable protein ABIL4 OS=Oryza sativa subsp. japonica OX=39947 GN=Os05g0585400 PE=2 SV=1 && -	Nin-like
123055325	1288.26	1016.05	918.504	173.266	210.792	166.01	1074.27	183.356	2.5507	1.02e-24	1.34e-21	LOC123055325	NC_057799.1	645514406	645517750	-	2349	protein_coding	uncharacterized LOC123055325%2C transcript variant X1 && - && -	-
123044580	234.421	315.937	226.169	17.2253	27.8405	20.6341	258.843	21.8999	3.56344	2.04e-24	2.65e-21	LOC123044580	NC_057798.1	244785764	244790082	-	2873	protein_coding	probable mixed-linked glucan synthase 3 && sp|Q6ZF85|CSLF3_ORYSJ Probable mixed-linked glucan synthase 3 OS=Oryza sativa subsp. japonica OX=39947 GN=CSLF3 PE=3 SV=1 && PF03552:Cellulose synthase	LBD
novel.699	268.212	472.971	244.934	25.3314	12.9259	20.6341	328.706	19.6304	4.06664	2.72e-24	3.47e-21	-	NC_057797.1	784790555	784793326	-	2772	-	- && - && -	TCP
123156041	193.239	220.595	385.179	14.1856	17.8974	11.2549	266.338	14.446	4.20731	5.84e-24	7.34e-21	LOC123156041	NC_057813.1	49427536	49432783	+	4397	protein_coding	uncharacterized LOC123156041%2C transcript variant X1 && sp|Q05609|CTR1_ARATH Serine/threonine-protein kinase CTR1 OS=Arabidopsis thaliana OX=3702 GN=CTR1 PE=1 SV=1 && PF00564:PB1 domain|PF07714:Protein tyrosine kinase	NF-YC
123051154	307.282	472.037	421.722	37.4904	55.6809	45.0197	400.347	46.0637	3.11976	8.5e-24	1.05e-20	LOC123051154	NC_057799.1	15917274	15922456	+	3301	protein_coding	formin-like protein 18 && sp|Q0D5P3|FH11_ORYSJ Formin-like protein 11 OS=Oryza sativa subsp. japonica OX=39947 GN=FH11 PE=2 SV=1 && PF02181:Formin Homology 2 Domain	M-type_MADS
542947	2693.73	1891.89	1589.11	173.266	302.268	279.498	2058.24	251.677	3.03133	1.17e-23	1.42e-20	LOC542947	NC_057794.1	266090684	266094858	-	1034	protein_coding	ribonuclease 1 && sp|P42813|RNS1_ARATH Ribonuclease 1 OS=Arabidopsis thaliana OX=3702 GN=RNS1 PE=1 SV=1 && PF00445:Ribonuclease T2 family	bZIP
123080931	2163.64	1412.37	900.726	97.2724	158.094	72.2192	1492.25	109.195	3.7731	1.42e-23	1.7e-20	LOC123080931	NC_057802.1	608196726	608197439	+	714	protein_coding	wheatwin-2 && sp|O64393|WHW2_WHEAT Wheatwin-2 OS=Triticum aestivum OX=4565 GN=PR4B PE=1 SV=1 && PF00967:Barwin family	-
123187226	1324.16	1149.71	957.021	5872.82	4808.45	5224.17	1143.63	5301.81	-2.21298	2.07e-23	2.44e-20	LOC123187226	NC_057797.1	34601996	34603463	-	848	protein_coding	ribulose bisphosphate carboxylase small subunit%2C chloroplastic 2-like && sp|P26667|RBS2_WHEAT Ribulose bisphosphate carboxylase small subunit, chloroplastic 2 OS=Triticum aestivum OX=4565 GN=RBCS2 PE=3 SV=1 && PF12338:Ribulose-1,5-bisphosphate carboxylase small subunit|PF00101:Ribulose bisphosphate carboxylase, small chain	M-type_MADS
novel.2784	172138	72807.7	61148.6	8704.87	7487.1	9495.41	102031	8562.46	3.57484	7.83e-23	9.08e-20	-	NC_057811.1	492575920	492576909	+	891	-	- && - && -	-
123116460	3.16785	10.282	0.987638	164.147	185.935	263.553	4.81249	204.545	-5.38366	8.9e-23	1.02e-19	LOC123116460	NC_057807.1	466959458	466960845	-	775	protein_coding	transcription factor RADIALIS-like && sp|Q6NNN0|RADL3_ARATH Protein RADIALIS-like 3 OS=Arabidopsis thaliana OX=3702 GN=RL3 PE=2 SV=1 && PF00249:Myb-like DNA-binding domain	MYB_related
123123898	131.994	635.614	443.45	12.1591	6.96012	11.2549	403.686	10.1247	5.31735	1.04e-22	1.17e-19	LOC123123898	NC_057808.1	560741424	560744560	-	2601	protein_coding	uncharacterized LOC123123898 && - && -	-
123054799	12986.1	8870.55	9325.28	1355.73	1264.75	2123.43	10394	1581.31	2.71642	3.13e-22	3.48e-19	LOC123054799	NC_057799.1	593947047	593949412	-	1751	protein_coding	adenosylhomocysteinase-like && sp|P32112|SAHH_WHEAT Adenosylhomocysteinase OS=Triticum aestivum OX=4565 GN=SAHH PE=2 SV=1 && PF00670:S-adenosyl-L-homocysteine hydrolase, NAD binding domain|PF05221:S-adenosyl-L-homocysteine hydrolase	bHLH
novel.2931	17.9512	12.1514	6.91347	172.253	234.655	180.079	12.3387	195.663	-3.99461	4.03e-22	4.41e-19	-	NC_057812.1	75979412	75984038	-	4547	-	- && - && -	GeBP
123096278	9524.68	10258.6	8735.66	882.544	930.667	1848.62	9506.32	1220.61	2.96109	7.28e-22	7.86e-19	LOC123096278	NC_057805.1	69575716	69578992	+	1553	protein_coding	very-long-chain aldehyde decarbonylase GL1-10-like && sp|Q9AV39|GLO1A_ORYSJ Very-long-chain aldehyde decarbonylase GL1-10 OS=Oryza sativa subsp. japonica OX=39947 GN=GL1-10 PE=2 SV=1 && PF04116:Fatty acid hydroxylase superfamily	-
123047502	157.337	172.924	187.651	1.01325	1.9886	2.81373	172.637	1.93853	6.46203	8.31e-22	8.84e-19	LOC123047502	NC_057798.1	797143420	797145547	+	2004	protein_coding	oxalate--CoA ligase-like && sp|Q9SMT7|4CLLA_ARATH Oxalate--CoA ligase OS=Arabidopsis thaliana OX=3702 GN=AAE3 PE=1 SV=1 && PF00501:AMP-binding enzyme|PF13193:AMP-binding enzyme C-terminal domain	NAC
123083253	565.99	371.086	267.65	0	0.994302	1.87582	401.575	0.956708	8.68012	1.12e-21	1.18e-18	LOC123083253	NC_057803.1	706328149	706330890	-	1392	protein_coding	uncharacterized LOC123083253 && - && PF01419:Jacalin-like lectin domain|PF03018:Dirigent-like protein	NAC
123190204	14.7833	28.0418	52.3448	1047.7	709.932	346.089	31.7233	701.242	-4.4635	1.37e-21	1.42e-18	LOC123190204	NC_057797.1	682501636	682503770	-	2135	protein_coding	36.4 kDa proline-rich protein-like && sp|Q00451|PRF1_SOLLC 36.4 kDa proline-rich protein OS=Solanum lycopersicum OX=4081 GN=TPRP-F1 PE=2 SV=1 && PF14547:Hydrophobic seed protein	Trihelix
123112441	62.3011	114.971	101.727	1008.19	776.55	573.064	92.9997	785.934	-3.07667	1.61e-21	1.64e-18	LOC123112441	NC_057807.1	457657410	457659164	+	1297	protein_coding	cinnamoyl-CoA reductase 1-like && sp|Q9S9N9|CCR1_ARATH Cinnamoyl-CoA reductase 1 OS=Arabidopsis thaliana OX=3702 GN=CCR1 PE=1 SV=1 && PF01370:NAD dependent epimerase/dehydratase family	NAC
novel.2334	13.7274	24.3029	11.8517	188.465	442.465	256.05	16.6273	295.66	-4.14598	3.22e-21	3.25e-18	-	NC_057808.1	502796720	502799499	+	2780	-	- && - && -	-
100526689	466.73	362.674	829.616	57.7555	54.6866	53.4609	553.007	55.301	3.32208	3.96e-21	3.94e-18	LOC100526689	NC_057795.1	484447855	484452494	-	2025	protein_coding	seven trans-membrane protein && sp|O49621|MLO1_ARATH MLO-like protein 1 OS=Arabidopsis thaliana OX=3702 GN=MLO1 PE=1 SV=1 && PF03094:Mlo family	ARF
123063693	1135.15	1369.37	1960.46	228.995	193.889	279.498	1488.33	234.127	2.668	5.57e-21	5.47e-18	LOC123063693	NC_057800.1	744752164	744757666	-	1851	protein_coding	vacuolar-processing enzyme gamma-isozyme-like && sp|Q39119|VPEG_ARATH Vacuolar-processing enzyme gamma-isozyme OS=Arabidopsis thaliana OX=3702 GN=At4g32940 PE=1 SV=2 && PF01650:Peptidase C13 family	-
123122887	539.591	387.911	337.772	60.7953	53.6923	66.5917	421.758	60.3598	2.80365	6.41e-21	6.21e-18	LOC123122887	NC_057808.1	472350721	472353339	+	2009	protein_coding	UDP-glucose 6-dehydrogenase 4-like && sp|Q2QS14|UGDH4_ORYSJ UDP-glucose 6-dehydrogenase 4 OS=Oryza sativa subsp. japonica OX=39947 GN=UGD4 PE=2 SV=1 && PF03720:UDP-glucose/GDP-mannose dehydrogenase family, UDP binding domain|PF03721:UDP-glucose/GDP-mannose dehydrogenase family, NAD binding domain|PF00984:UDP-glucose/GDP-mannose dehydrogenase family, central domain	MYB_related
123143439	98169.6	85813.5	57950.7	16482.6	10194.6	12195.7	80644.6	12957.6	2.63778	6.8e-21	6.51e-18	LOC123143439	NC_057795.1	629509503	629515258	-	2575	protein_coding	phosphomethylethanolamine N-methyltransferase-like%2C transcript variant X2 && sp|Q944H0|PEAM2_ARATH Phosphomethylethanolamine N-methyltransferase OS=Arabidopsis thaliana OX=3702 GN=NMT2 PE=1 SV=2 && -	-
123182224	3519.48	2452.72	3424.14	576.542	697.006	448.322	3132.12	573.956	2.44827	7.29e-21	6.9e-18	LOC123182224	NC_057796.1	381337750	381346090	-	2888	protein_coding	delta-1-pyrroline-5-carboxylate synthase 1-like && sp|O04226|P5CS1_ORYSJ Delta-1-pyrroline-5-carboxylate synthase 1 OS=Oryza sativa subsp. japonica OX=39947 GN=P5CS1 PE=2 SV=2 && PF00171:Aldehyde dehydrogenase family|PF00696:Amino acid kinase family	B3
123135734	2922.87	1830.19	2619.22	460.017	534.935	418.308	2457.43	471.087	2.3831	9.17e-21	8.56e-18	LOC123135734	NC_057795.1	513889685	513897724	-	2767	protein_coding	delta-1-pyrroline-5-carboxylate synthase 1-like && sp|O04226|P5CS1_ORYSJ Delta-1-pyrroline-5-carboxylate synthase 1 OS=Oryza sativa subsp. japonica OX=39947 GN=P5CS1 PE=2 SV=2 && PF00696:Amino acid kinase family|PF00171:Aldehyde dehydrogenase family	B3
123114428	539.591	647.765	626.163	94.2326	125.282	131.308	604.506	116.941	2.36931	9.68e-21	8.93e-18	LOC123114428	NC_057807.1	706673562	706680389	+	2232	protein_coding	beta-fructofuranosidase%2C insoluble isoenzyme 4-like%2C transcript variant X1 && sp|Q5JJV0|INV4_ORYSJ Beta-fructofuranosidase, insoluble isoenzyme 4 OS=Oryza sativa subsp. japonica OX=39947 GN=CIN4 PE=2 SV=1 && PF08244:Glycosyl hydrolases family 32 C terminal|PF00251:Glycosyl hydrolases family 32 N-terminal domain	-
123121283	1950.34	1728.31	1607.88	6087.63	7165.94	6224.92	1762.17	6492.83	-1.88156	1.71e-20	1.56e-17	LOC123121283	NC_057808.1	294712742	294716059	-	1213	protein_coding	putative glucose-6-phosphate 1-epimerase && sp|P39173|YEAD_ECOLI Putative glucose-6-phosphate 1-epimerase OS=Escherichia coli (strain K12) OX=83333 GN=yeaD PE=1 SV=2 && PF01263:Aldose 1-epimerase	NAC
123070428	705.375	728.152	680.483	2271.72	2625.95	2590.51	704.67	2496.06	-1.82462	2.06e-20	1.85e-17	LOC123070428	NC_057801.1	470056386	470069805	-	2832	protein_coding	chloride channel protein CLC-e-like && sp|Q8GX93|CLCE_ARATH Chloride channel protein CLC-e OS=Arabidopsis thaliana OX=3702 GN=CLC-E PE=2 SV=2 && PF00654:Voltage gated chloride channel	-
123142887	34.8464	102.82	34.5673	1408.42	1007.23	577.753	57.4112	997.802	-4.11546	3.12e-20	2.78e-17	LOC123142887	NC_057811.1	1403779	1407982	-	3951	protein_coding	putative receptor-like protein kinase At3g47110 && sp|Q2R2D5|XA21_ORYSJ Receptor kinase-like protein Xa21 OS=Oryza sativa subsp. japonica OX=39947 GN=XA21 PE=1 SV=1 && PF13855:Leucine rich repeat|PF08263:Leucine rich repeat N-terminal domain|PF07714:Protein tyrosine kinase	C3H
123112440	10.5595	22.4334	43.4561	598.833	438.487	288.877	25.483	442.066	-4.1126	3.32e-20	2.92e-17	LOC123112440	NC_057807.1	457498925	457500600	+	1234	transcribed_pseudogene	cinnamoyl-CoA reductase 1-like && sp|A0A059TC02|CCR1_PETHY Cinnamoyl-CoA reductase 1 OS=Petunia hybrida OX=4102 GN=CCR1 PE=1 SV=1 && PF01370:NAD dependent epimerase/dehydratase family	NAC
123072603	1051.73	939.4	1347.14	251.287	247.581	226.037	1112.76	241.635	2.20339	3.88e-20	3.37e-17	LOC123072603	NC_057801.1	812989559	813007504	+	9154	protein_coding	protein DETOXIFICATION 40-like%2C transcript variant X1 && sp|Q9LVD9|DTX40_ARATH Protein DETOXIFICATION 40 OS=Arabidopsis thaliana OX=3702 GN=DTX40 PE=1 SV=1 && PF01554:MatE	MYB_related
123048840	27.4547	45.8016	23.7033	244.194	301.274	298.256	32.3199	281.241	-3.11646	4.08e-20	3.49e-17	LOC123048840	NC_057799.1	81444678	81446994	-	953	protein_coding	protein RICE FLOWERING LOCUS T 1-like && sp|Q8VWH2|RFT1_ORYSJ Protein RICE FLOWERING LOCUS T 1 OS=Oryza sativa subsp. japonica OX=39947 GN=RFT1 PE=1 SV=1 && PF01161:Phosphatidylethanolamine-binding protein	NAC
123060819	244.981	227.138	170.861	0	0	3.75165	214.327	1.25055	7.36294	4.1e-20	3.49e-17	LOC123060819	NC_057800.1	165473197	165478550	-	1850	protein_coding	putative ubiquitin-conjugating enzyme E2 38%2C transcript variant X1 && sp|Q8VY10|UBC24_ARATH Probable ubiquitin-conjugating enzyme E2 24 OS=Arabidopsis thaliana OX=3702 GN=UBC24 PE=1 SV=1 && PF00179:Ubiquitin-conjugating enzyme	GRAS
123079740	850.041	508.491	605.422	90.1796	111.362	114.425	654.651	105.322	2.63494	4.59e-20	3.87e-17	LOC123079740	NC_057802.1	468526572	468528385	+	1551	protein_coding	probable protein phosphatase 2C 9 && sp|Q5N9N2|P2C09_ORYSJ Probable protein phosphatase 2C 9 OS=Oryza sativa subsp. japonica OX=39947 GN=Os01g0846300 PE=2 SV=1 && PF00481:Protein phosphatase 2C	NAC
123062291	311.506	162.642	489.869	22.2916	16.9031	20.6341	321.339	19.9429	4.00986	4.92e-20	4.09e-17	LOC123062291	NC_057800.1	572642970	572646312	+	2110	protein_coding	probable nucleoredoxin 2%2C transcript variant X3 && sp|Q0JIL1|NRX2_ORYSJ Probable nucleoredoxin 2 OS=Oryza sativa subsp. japonica OX=39947 GN=Os01g0794400 PE=2 SV=1 && -	GATA
123182632	76.0285	63.5614	52.3448	566.409	531.952	328.269	63.9782	475.543	-2.89484	5.86e-20	4.83e-17	LOC123182632	NC_057796.1	429863106	429871159	-	1283	protein_coding	O-methyltransferase ZRP4-like && sp|P47917|ZRP4_MAIZE O-methyltransferase ZRP4 OS=Zea mays OX=4577 GN=ZRP4 PE=2 SV=1 && PF00891:O-methyltransferase domain|PF08100:Dimerisation domain	-
123045312	73.9166	44.8668	81.974	401.249	474.282	437.067	66.9191	437.533	-2.71145	1.05e-19	8.55e-17	LOC123045312	NC_057798.1	432496138	432498854	+	2397	lncRNA	uncharacterized LOC123045312 && - && -	-
123174906	4538.48	3396.79	2471.07	689.013	453.402	555.244	3468.78	565.886	2.61587	1.09e-19	8.78e-17	LOC123174906	NC_057796.1	454938298	454941391	+	1854	protein_coding	phosphomethylethanolamine N-methyltransferase-like && sp|Q944H0|PEAM2_ARATH Phosphomethylethanolamine N-methyltransferase OS=Arabidopsis thaliana OX=3702 GN=NMT2 PE=1 SV=2 && PF13489:Methyltransferase domain|PF08241:Methyltransferase domain	-
123092625	272.435	87.8642	565.917	5.06627	4.97151	7.50329	308.739	5.84702	5.71816	1.19e-19	9.52e-17	LOC123092625	NC_057804.1	447786051	447787924	+	1640	protein_coding	probable protein phosphatase 2C 30 && sp|Q84JI0|P2C30_ORYSJ Probable protein phosphatase 2C 30 OS=Oryza sativa subsp. japonica OX=39947 GN=PP2C30 PE=1 SV=1 && PF00481:Protein phosphatase 2C	NAC
123167959	159.449	199.097	144.195	4.05302	4.97151	15.0066	167.58	8.01037	4.37169	1.43e-19	1.13e-16	LOC123167959	NC_057814.1	602932777	602934827	-	1474	protein_coding	patatin-like protein 2 && sp|A2YW91|PLP2_ORYSI Patatin-like protein 2 OS=Oryza sativa subsp. indica OX=39946 GN=PLP2 PE=3 SV=1 && PF01734:Patatin-like phospholipase	-
123128335	345.296	239.29	548.139	39.5169	32.812	40.3302	377.575	37.553	3.32918	1.55e-19	1.21e-16	LOC123128335	NC_057809.1	535900427	535902593	+	1285	protein_coding	annexin D7-like && sp|Q9LX07|ANXD7_ARATH Annexin D7 OS=Arabidopsis thaliana OX=3702 GN=ANNAT7 PE=2 SV=1 && PF00191:Annexin	MYB
123080128	10.5595	11.2167	14.8146	193.532	131.248	145.376	12.1969	156.719	-3.68215	2.21e-19	1.71e-16	LOC123080128	NC_057802.1	516621613	516625202	-	1828	protein_coding	gibberellin 20 oxidase 2-like && sp|P0C5H5|GAOX2_ORYSI Gibberellin 20 oxidase 2 OS=Oryza sativa subsp. indica OX=39946 GN=20ox2 PE=1 SV=1 && PF03171:2OG-Fe(II) oxygenase superfamily|PF14226:non-haem dioxygenase in morphine synthesis N-terminal	WRKY
123145997	3867.95	2449.92	2804.89	622.138	596.581	722.192	3040.92	646.97	2.23251	3.02e-19	2.32e-16	LOC123145997	NC_057811.1	471590633	471596418	+	1827	protein_coding	betaine aldehyde dehydrogenase 2-like && sp|B3VMC0|BADH2_ORYSI Betaine aldehyde dehydrogenase 2 OS=Oryza sativa subsp. indica OX=39946 GN=BADH2 PE=2 SV=1 && PF00171:Aldehyde dehydrogenase family	bHLH
123124810	44.3499	35.5196	27.6539	371.864	332.097	214.782	35.8411	306.248	-3.09681	4e-19	3.03e-16	LOC123124810	NC_057808.1	332557319	332558275	+	957	protein_coding	uncharacterized LOC123124810 && - && -	-
123187225	2123.52	1931.14	1602.94	8192.16	8053.85	6350.6	1885.87	7532.2	-1.99788	4.5e-19	3.38e-16	LOC123187225	NC_057797.1	34606930	34608374	-	852	protein_coding	ribulose bisphosphate carboxylase small subunit%2C chloroplastic 2 && sp|P26667|RBS2_WHEAT Ribulose bisphosphate carboxylase small subunit, chloroplastic 2 OS=Triticum aestivum OX=4565 GN=RBCS2 PE=3 SV=1 && PF12338:Ribulose-1,5-bisphosphate carboxylase small subunit|PF00101:Ribulose bisphosphate carboxylase, small chain	M-type_MADS
123172866	333.681	148.621	239.996	23.3048	9.94302	10.317	240.766	14.5216	4.05567	4.86e-19	3.62e-16	LOC123172866	NC_057796.1	429426853	429428614	+	1659	protein_coding	cytochrome P450 71A1-like && sp|P24465|C71A1_PERAE Cytochrome P450 71A1 OS=Persea americana OX=3435 GN=CYP71A1 PE=1 SV=2 && PF00067:Cytochrome P450	E2F/DP
123187222	6230.11	5455.06	4595.48	22257.1	20969.8	18307.1	5426.88	20511.4	-1.91825	6.93e-19	5.11e-16	LOC123187222	NC_057797.1	34588221	34589397	-	888	protein_coding	ribulose bisphosphate carboxylase small subunit%2C chloroplastic 1-like && sp|P00871|RBS1_WHEAT Ribulose bisphosphate carboxylase small subunit, chloroplastic 1 OS=Triticum aestivum OX=4565 GN=RBCS1 PE=3 SV=2 && PF00101:Ribulose bisphosphate carboxylase, small chain|PF12338:Ribulose-1,5-bisphosphate carboxylase small subunit	M-type_MADS
123128456	582.885	208.444	610.36	37.4904	19.886	38.4544	467.23	31.9436	3.86933	9.88e-19	7.21e-16	LOC123128456	NC_057809.1	555441810	555443176	+	1367	protein_coding	protein PHOSPHATE-INDUCED 1-like && sp|O82161|PHI1_TOBAC Protein PHOSPHATE-INDUCED 1 OS=Nicotiana tabacum OX=4097 GN=PHI-1 PE=2 SV=1 && PF04674:Phosphate-induced protein 1 conserved region	MYB
123085512	2201.66	2061.07	2366.38	563.369	666.183	484.9	2209.7	571.484	1.95124	1e-18	7.22e-16	LOC123085512	NC_057803.1	117245759	117250224	-	1263	protein_coding	protein IN2-1 homolog B-like && sp|A1XBB7|IN21B_ORYSI Protein IN2-1 homolog B OS=Oryza sativa subsp. indica OX=39946 GN=GSTZ5 PE=1 SV=1 && PF13410:Glutathione S-transferase, C-terminal domain|PF13417:Glutathione S-transferase, N-terminal domain	-
123119188	47.5178	61.6919	50.3695	332.347	263.49	344.213	53.1931	313.35	-2.55651	1.01e-18	7.22e-16	LOC123119188	NC_057808.1	25359905	25361022	+	1045	protein_coding	probable glutathione S-transferase GSTU6 && sp|Q06398|GSTU6_ORYSJ Probable glutathione S-transferase GSTU6 OS=Oryza sativa subsp. japonica OX=39947 GN=GSTU6 PE=2 SV=2 && PF02798:Glutathione S-transferase, N-terminal domain	-
123077365	189.015	94.4073	124.442	995.016	726.835	894.767	135.955	872.206	-2.6837	1.09e-18	7.72e-16	LOC123077365	NC_057802.1	55091623	55093466	-	1739	protein_coding	7-deoxyloganetin glucosyltransferase-like && sp|F8WKW1|UGT2_GARJA 7-deoxyloganetin glucosyltransferase OS=Gardenia jasminoides OX=114476 GN=UGT85A24 PE=1 SV=1 && PF00201:UDP-glucoronosyl and UDP-glucosyl transferase	GRAS
123102606	1219.62	1246.92	1255.29	326.268	308.234	384.544	1240.61	339.682	1.86847	1.28e-18	8.98e-16	LOC123102606	NC_057806.1	128023966	128029653	-	2693	protein_coding	F-box/LRR-repeat protein 3-like%2C transcript variant X1 && - && -	WRKY
123065943	76999.9	63266	36637.4	11258.3	8686.22	7460.15	58967.8	9134.88	2.69048	1.32e-18	9.2e-16	LOC123065943	NC_057794.1	549059650	549065069	-	2167	protein_coding	phosphomethylethanolamine N-methyltransferase-like && sp|Q944H0|PEAM2_ARATH Phosphomethylethanolamine N-methyltransferase OS=Arabidopsis thaliana OX=3702 GN=NMT2 PE=1 SV=2 && PF08241:Methyltransferase domain|PF13489:Methyltransferase domain	-
123090691	51.7416	23.3681	17.7775	361.732	294.313	318.89	30.9624	324.978	-3.39918	1.38e-18	9.52e-16	LOC123090691	NC_057804.1	23441296	23444018	-	1668	protein_coding	uncharacterized LOC123090691 && - && PF04982:HPP family	-
123182417	1680.02	800.125	700.236	12290.8	6947.19	8766.66	1060.13	9334.87	-3.13865	1.59e-18	1.08e-15	LOC123182417	NC_057796.1	405463149	405463974	-	826	protein_coding	chlorophyll a-b binding protein of LHCII type 1-like && sp|P07369|CB2G_SOLLC Chlorophyll a-b binding protein 3C, chloroplastic OS=Solanum lycopersicum OX=4081 GN=CAB3C PE=3 SV=1 && PF00504:Chlorophyll A-B binding protein	ERF
123097934	478.346	188.815	784.185	22.2916	27.8405	34.7027	483.782	28.2783	4.09471	1.59e-18	1.08e-15	LOC123097934	NC_057805.1	363257694	363259547	+	1611	protein_coding	probable protein phosphatase 2C 30 && sp|Q84JI0|P2C30_ORYSJ Probable protein phosphatase 2C 30 OS=Oryza sativa subsp. japonica OX=39947 GN=PP2C30 PE=1 SV=1 && PF00481:Protein phosphatase 2C	NAC
123065072	655.746	318.742	637.027	80.0471	61.6467	55.3368	537.171	65.6769	3.03254	1.63e-18	1.1e-15	LOC123065072	NC_057801.1	151920020	151920850	-	831	protein_coding	embryo-specific protein ATS3A-like && - && PF06232:Embryo-specific protein 3, (ATS3)	-
123112643	639.906	349.588	1289.86	22.2916	40.7664	63.778	759.783	42.2787	4.16504	1.74e-18	1.16e-15	LOC123112643	NC_057807.1	481749201	481757565	-	1974	protein_coding	beta-glucosidase 31-like && sp|B7F7K7|BGL31_ORYSJ Beta-glucosidase 31 OS=Oryza sativa subsp. japonica OX=39947 GN=BGLU31 PE=2 SV=1 && PF00232:Glycosyl hydrolase family 1	NAC
101290659	1796.17	990.81	2726.87	131.723	129.259	253.236	1837.95	171.406	3.42177	2.1e-18	1.39e-15	LOC101290659	NC_057813.1	75392727	75393861	-	1135	protein_coding	uncharacterized LOC101290659 && - && PF07911:Protein of unknown function (DUF1677)	ARF
100859955	73.9166	68.235	62.2212	311.069	335.08	376.102	68.1243	340.75	-2.32341	2.34e-18	1.54e-15	LOC100859955	NC_057814.1	12978196	12982821	+	2830	protein_coding	ent-kaurenoic acid oxidase 1%2C transcript variant X1 && sp|Q9AXH9|KAO1_HORVU Ent-kaurenoic acid oxidase 1 OS=Hordeum vulgare OX=4513 GN=KAO1 PE=1 SV=1 && PF00067:Cytochrome P450	G2-like
123181837	1777.17	1122.61	775.296	133.75	162.071	67.5296	1225.02	121.117	3.33918	2.41e-18	1.56e-15	LOC123181837	NC_057794.1	264827436	264828533	+	934	protein_coding	ribonuclease 1-like && - && PF00445:Ribonuclease T2 family	-
123143229	1940.84	2414.4	3202.91	10480.1	10989	11182.7	2519.38	10883.9	-2.111	2.77e-18	1.77e-15	LOC123143229	NC_057811.1	27291492	27293128	+	1366	protein_coding	peroxidase 70-like && sp|A5H452|PER70_MAIZE Peroxidase 70 OS=Zea mays OX=4577 GN=PER70 PE=1 SV=1 && PF00141:Peroxidase	NAC
123092289	1002.1	405.671	1717.5	0	3.97721	3.75165	1041.76	2.57628	8.65028	2.78e-18	1.77e-15	LOC123092289	NC_057795.1	436480912	436482147	-	1236	protein_coding	RING-H2 finger protein ATL2-like && sp|Q9XF63|ATL3_ARATH RING-H2 finger protein ATL3 OS=Arabidopsis thaliana OX=3702 GN=ATL3 PE=2 SV=1 && PF13639:Ring finger domain	WOX
123164306	4.2238	3.7389	6.91347	102.339	109.373	131.308	4.95873	114.34	-4.52895	2.95e-18	1.87e-15	LOC123164306	NC_057796.1	36096036	36098275	+	1389	protein_coding	bidirectional sugar transporter SWEET14-like && sp|B8BKP4|SWT14_ORYSI Bidirectional sugar transporter SWEET14 OS=Oryza sativa subsp. indica OX=39946 GN=SWEET14 PE=2 SV=1 && PF03083:Sugar efflux transporter for intercellular exchange	DBB
123181391	139.386	145.817	144.195	17.2253	8.94872	12.1928	143.133	12.789	3.48677	3.11e-18	1.95e-15	LOC123181391	NC_057796.1	264386813	264389427	-	2615	protein_coding	subtilisin-like protease 4 && sp|A9QY38|SBT4_LOTJA Subtilisin-like protease 4 OS=Lotus japonicus OX=34305 GN=SBTM4 PE=2 SV=1 && PF05922:Peptidase inhibitor I9|PF02225:PA domain|PF00082:Subtilase family|PF17766:Fibronectin type-III domain	Trihelix
101290633	478.346	470.167	398.018	105.378	103.407	100.357	448.844	103.047	2.12304	3.82e-18	2.38e-15	LOC101290633	NC_057814.1	36559932	36562899	-	2968	protein_coding	arginine decarboxylase 1 && sp|Q9SNN0|SPE1_ORYSJ Arginine decarboxylase 1 OS=Oryza sativa subsp. japonica OX=39947 GN=ADC1 PE=1 SV=1 && PF02784:Pyridoxal-dependent decarboxylase, pyridoxal binding domain	G2-like
123046562	218.582	189.749	279.502	4.05302	2.98291	20.6341	229.278	9.22332	4.61925	3.96e-18	2.44e-15	LOC123046562	NC_057798.1	661455242	661457928	+	1693	protein_coding	ubiquinol oxidase 1b%2C mitochondrial-like%2C transcript variant X2 && sp|O82766|AOX1B_ORYSJ Ubiquinol oxidase 1b, mitochondrial OS=Oryza sativa subsp. japonica OX=39947 GN=AOX1B PE=2 SV=1 && PF01786:Alternative oxidase	-
123046305	360.079	639.353	874.06	61.8085	89.4872	52.523	624.497	67.9396	3.20138	3.98e-18	2.44e-15	LOC123046305	NC_057798.1	614964991	614975066	+	3699	protein_coding	uncharacterized LOC123046305 && - && PF08596:Lethal giant larvae(Lgl) like, C-terminal	-
123120334	232.309	412.214	442.462	2264.62	1744.01	2779.03	362.328	2262.55	-2.64201	4.36e-18	2.65e-15	LOC123120334	NC_057808.1	231181026	231195956	-	2099	protein_coding	uncharacterized LOC123120334%2C transcript variant X3 && - && -	-
123054163	466.73	744.042	978.749	100.312	124.288	86.2878	729.841	103.629	2.8169	4.71e-18	2.83e-15	LOC123054163	NC_057799.1	517951886	517961760	+	3682	protein_coding	uncharacterized LOC123054163%2C transcript variant X1 && sp|Q5DQR4|STB5L_MOUSE Syntaxin-binding protein 5-like OS=Mus musculus OX=10090 GN=Stxbp5l PE=1 SV=1 && PF08596:Lethal giant larvae(Lgl) like, C-terminal	-
123093801	98.2034	65.4308	65.1841	387.063	528.969	411.743	76.2728	442.592	-2.53924	4.73e-18	2.83e-15	LOC123093801	NC_057804.1	642788436	642791598	+	960	protein_coding	MADS-box transcription factor 51-like && sp|Q9XJ61|MAD51_ORYSJ MADS-box transcription factor 51 OS=Oryza sativa subsp. japonica OX=39947 GN=MADS51 PE=2 SV=1 && PF00319:SRF-type transcription factor (DNA-binding and dimerisation domain)	M-type_MADS
123041724	204.854	114.971	308.143	10.1325	12.9259	15.9445	209.323	13.001	4.00529	4.91e-18	2.92e-15	LOC123041724	NC_057798.1	586515090	586516390	+	1206	protein_coding	homeobox-leucine zipper protein HOX22-like && sp|Q01IK0|HOX22_ORYSI Homeobox-leucine zipper protein HOX22 OS=Oryza sativa subsp. indica OX=39946 GN=HOX22 PE=2 SV=2 && PF00046:Homeodomain|PF02183:Homeobox associated leucine zipper	HD-ZIP
100049032	159.449	287.896	160.985	16.2121	19.886	19.6961	202.776	18.5981	3.44655	5.22e-18	3.07e-15	LOC100049032	NC_057797.1	727199360	727200951	-	1308	protein_coding	WRKY DNA-binding transcription factor 70 && sp|K4BIZ9|WRK70_SOLLC WRKY DNA-binding transcription factor 70 OS=Solanum lycopersicum OX=4081 GN=WRKY70 PE=2 SV=1 && PF03106:WRKY DNA -binding domain	WRKY
123090606	15566.8	9694.04	7211.73	1696.19	1863.32	1121.74	10824.2	1560.42	2.79431	5.51e-18	3.22e-15	LOC123090606	NC_057795.1	308151055	308152774	+	1199	protein_coding	ribonuclease 1-like%2C transcript variant X1 && - && PF00445:Ribonuclease T2 family	-
123127933	5105.52	4289.46	3676.98	1238.2	1099.7	1204.28	4357.32	1180.72	1.88372	5.59e-18	3.24e-15	LOC123127933	NC_057809.1	462424178	462427012	-	1773	protein_coding	S-adenosylmethionine synthase 3 && sp|Q4LB22|METK3_HORVU S-adenosylmethionine synthase 3 OS=Hordeum vulgare OX=4513 GN=SAM3 PE=2 SV=1 && PF00438:S-adenosylmethionine synthetase, N-terminal domain|PF02772:S-adenosylmethionine synthetase, central domain|PF02773:S-adenosylmethionine synthetase, C-terminal domain	-
543235	982.034	711.326	817.764	186.439	207.809	209.154	837.042	201.134	2.05665	6.44e-18	3.71e-15	LOC543235	NC_057794.1	300377650	300378411	-	664	protein_coding	uncharacterized LOC543235 && sp|C0HJG8|BSP_BOSSE Basic secretory protease (Fragments) OS=Boswellia serrata OX=613112 PE=1 SV=1 && PF04450:Peptidase of plants and bacteria	-
123156972	69.6928	83.1906	57.283	468.123	342.04	362.972	70.0555	391.045	-2.4795	7.29e-18	4.17e-15	LOC123156972	NC_057813.1	4645729	4652717	+	2639	protein_coding	probable sugar phosphate/phosphate translocator At1g06470 && sp|Q8H184|PT106_ARATH Probable sugar phosphate/phosphate translocator At1g06470 OS=Arabidopsis thaliana OX=3702 GN=At1g06470 PE=2 SV=1 && PF03151:Triose-phosphate Transporter family	ERF
123088179	187.959	351.457	342.71	31.4109	40.7664	34.7027	294.042	35.6267	3.04563	7.69e-18	4.36e-15	LOC123088179	NC_057803.1	691970534	691976934	-	2953	protein_coding	uncharacterized LOC123088179%2C transcript variant X9 && - && -	-
123102262	164.728	113.102	126.418	968.671	795.442	562.747	134.749	775.62	-2.52616	7.75e-18	4.37e-15	LOC123102262	NC_057806.1	49463560	49466500	-	1756	protein_coding	probable glucan 1%2C3-beta-glucosidase A && sp|P0C2S3|GUNC_HUNTH Endoglucanase C OS=Hungateiclostridium thermocellum OX=1515 GN=celC PE=1 SV=1 && PF00150:Cellulase (glycosyl hydrolase family 5)	-
123183175	4.2238	22.4334	14.8146	222.916	180.963	196.023	13.8239	199.967	-3.83893	8.02e-18	4.48e-15	LOC123183175	NC_057796.1	476641689	476642936	+	1248	protein_coding	protein RADIALIS-like 5 && sp|Q8GW75|RADL5_ARATH Protein RADIALIS-like 5 OS=Arabidopsis thaliana OX=3702 GN=RL5 PE=3 SV=1 && -	MYB_related
123147790	961.971	1002.03	2317	129.697	190.906	167.886	1427	162.83	3.1314	9.16e-18	5.08e-15	LOC123147790	NC_057812.1	497296927	497301395	+	2211	protein_coding	phosphomannomutase/phosphoglucomutase-like && sp|Q88C93|ALGC_PSEPK Phosphomannomutase/phosphoglucomutase OS=Pseudomonas putida (strain ATCC 47054 / DSM 6125 / NCIMB 11950 / KT2440) OX=160488 GN=algC PE=3 SV=1 && PF02878:Phosphoglucomutase/phosphomannomutase, alpha/beta/alpha domain I|PF02880:Phosphoglucomutase/phosphomannomutase, alpha/beta/alpha domain III|PF02879:Phosphoglucomutase/phosphomanno…	ARF
123097740	45.4059	31.7807	13.8269	534.998	351.983	257.926	30.3378	381.636	-3.65609	9.78e-18	5.39e-15	LOC123097740	NC_057805.1	334754333	334755348	+	1016	protein_coding	abscisic acid receptor PYL4-like && sp|O80920|PYL4_ARATH Abscisic acid receptor PYL4 OS=Arabidopsis thaliana OX=3702 GN=PYL4 PE=1 SV=1 && PF10604:Polyketide cyclase / dehydrase and lipid transport	MYB_related
123142753	1242.85	557.097	187.651	37.4904	15.9088	13.1308	662.534	22.1767	4.9037	1.01e-17	5.51e-15	LOC123142753	NC_057811.1	478111427	478112243	+	423	protein_coding	uncharacterized LOC123142753 && - && -	-
123117545	73.9166	100.95	61.2336	385.037	616.467	476.459	78.7002	492.654	-2.64459	1.28e-17	6.98e-15	LOC123117545	NC_057807.1	670804283	670805830	-	1068	protein_coding	uncharacterized LOC123117545%2C transcript variant X1 && - && -	-
123103519	318.897	395.389	222.219	11.1458	21.8747	40.3302	312.168	24.4502	3.66849	1.32e-17	7.14e-15	LOC123103519	NC_057806.1	386138625	386140497	+	1465	protein_coding	transcription factor WRKY19-like && sp|Q0DFT7|WRK19_ORYSJ Transcription factor WRKY19 OS=Oryza sativa subsp. japonica OX=39947 GN=WRKY19 PE=2 SV=1 && PF03106:WRKY DNA -binding domain	WRKY
123095709	306.226	278.548	274.563	1182.47	1270.72	927.594	286.446	1126.93	-1.97619	1.33e-17	7.14e-15	LOC123095709	NC_057805.1	11332816	11334823	-	1027	protein_coding	uncharacterized LOC123095709 && - && PF04982:HPP family	-
123043098	64.413	84.1253	16.7898	833.908	550.843	1091.73	55.1094	825.494	-3.90405	1.42e-17	7.54e-15	LOC123043098	NC_057798.1	9562994	9566038	-	870	lncRNA	uncharacterized LOC123043098 && - && -	-
123103140	261.876	229.008	515.547	23.3048	37.7835	34.7027	335.477	31.9304	3.39201	1.43e-17	7.54e-15	LOC123103140	NC_057806.1	320803857	320808940	+	1828	protein_coding	ethanolamine-phosphate cytidylyltransferase-like && sp|Q9ZVI9|PECT1_ARATH Ethanolamine-phosphate cytidylyltransferase OS=Arabidopsis thaliana OX=3702 GN=PECT1 PE=1 SV=1 && PF01467:Cytidylyltransferase-like	FAR1
123115905	28.5107	12.1514	7.90111	182.386	212.781	223.223	16.1877	206.13	-3.68262	1.45e-17	7.61e-15	LOC123115905	NC_057807.1	216509606	216511574	-	1379	lncRNA	uncharacterized LOC123115905 && - && -	-
123064947	57.0214	42.9974	67.1594	330.321	305.251	290.753	55.726	308.775	-2.47176	1.64e-17	8.54e-15	LOC123064947	NC_057801.1	96823649	96825486	-	1739	protein_coding	7-deoxyloganetin glucosyltransferase-like && sp|F8WKW1|UGT2_GARJA 7-deoxyloganetin glucosyltransferase OS=Gardenia jasminoides OX=114476 GN=UGT85A24 PE=1 SV=1 && PF00201:UDP-glucoronosyl and UDP-glucosyl transferase	GRAS
123167704	114.043	113.102	353.574	8.10603	4.97151	5.62747	193.573	6.235	4.9591	2.25e-17	1.16e-14	LOC123167704	NC_057814.1	584624769	584625811	+	1043	protein_coding	ethylene-responsive transcription factor RAP2-13-like && sp|Q9LM15|RA213_ARATH Ethylene-responsive transcription factor RAP2-13 OS=Arabidopsis thaliana OX=3702 GN=RAP2-13 PE=1 SV=1 && PF00847:AP2 domain	ERF
123079252	315.729	134.601	300.242	14.1856	25.8519	20.6341	250.191	20.2238	3.62713	2.64e-17	1.36e-14	LOC123079252	NC_057802.1	413950252	413952041	-	1556	protein_coding	UDP-arabinopyranose mutase 1-like && sp|Q8H8T0|RGP1_ORYSJ UDP-arabinopyranose mutase 1 OS=Oryza sativa subsp. japonica OX=39947 GN=UAM1 PE=1 SV=1 && PF03214:Reversibly glycosylated polypeptide	-
123112916	1057.01	1321.7	1097.27	4666.04	5657.58	3734.76	1158.66	4686.13	-2.01578	4.07e-17	2.08e-14	LOC123112916	NC_057795.1	151242867	151248633	+	2213	protein_coding	probable glucan endo-1%2C6-beta-glucosidase B && sp|Q876J3|EXG_SACU7 Glucan 1,3-beta-glucosidase OS=Saccharomyces uvarum (strain ATCC 76518 / CBS 7001 / CLIB 283 / NBRC 10550 / MCYC 623 / NCYC 2669 / NRRL Y-11845) OX=659244 GN=EXG1 PE=3 SV=1 && PF00150:Cellulase (glycosyl hydrolase family 5)	-
123112380	790.907	356.131	1385.66	15.1988	26.8462	71.2813	844.231	37.7754	4.47845	4.29e-17	2.18e-14	LOC123112380	NC_057807.1	448240353	448241542	+	958	protein_coding	induced stolen tip protein TUB8-like && - && -	-
123184844	31.6785	52.3447	39.5055	226.969	299.285	402.364	41.1762	309.539	-2.90707	4.41e-17	2.22e-14	LOC123184844	NC_057797.1	84017991	84020336	-	958	protein_coding	protein RICE FLOWERING LOCUS T 1-like && sp|Q8VWH2|RFT1_ORYSJ Protein RICE FLOWERING LOCUS T 1 OS=Oryza sativa subsp. japonica OX=39947 GN=RFT1 PE=1 SV=1 && PF01161:Phosphatidylethanolamine-binding protein	NAC
123142892	813.082	907.619	1570.34	213.797	168.037	167.886	1097.02	183.24	2.58213	5.12e-17	2.57e-14	LOC123142892	NC_057811.1	1759195	1764119	-	1978	protein_coding	amino acid transporter AVT1C-like && sp|F4IUW3|AVT1C_ARATH Amino acid transporter AVT1C OS=Arabidopsis thaliana OX=3702 GN=AVT1C PE=1 SV=1 && PF01490:Transmembrane amino acid transporter protein	-
123072181	523.752	388.846	291.353	2074.13	2742.29	1721.07	401.317	2179.16	-2.44135	6.9e-17	3.43e-14	LOC123072181	NC_057801.1	750070936	750071978	-	1043	protein_coding	flowering-promoting factor 1-like protein 2 && sp|Q9LGE3|FLP1_ORYSJ Flowering-promoting factor 1-like protein 1 OS=Oryza sativa subsp. japonica OX=39947 GN=RAA1 PE=1 SV=1 && -	-
100526756	147.833	120.58	238.021	802.497	1130.52	1433.13	168.811	1122.05	-2.73301	9.49e-17	4.69e-14	LOC100526756	NC_057806.1	673079681	673081291	+	1411	protein_coding	jacalin-related lectin 1 && sp|A2WPN7|SALT_ORYSI Salt stress-induced protein OS=Oryza sativa subsp. indica OX=39946 GN=SALT PE=1 SV=2 && PF01419:Jacalin-like lectin domain	NAC
123106601	159.449	178.533	394.068	12.1591	13.9202	24.3857	244.016	16.8217	3.85392	1.02e-16	5e-14	LOC123106601	NC_057806.1	70462491	70463607	+	902	protein_coding	HVA22-like protein e && sp|Q07764|HVA22_HORVU Protein HVA22 OS=Hordeum vulgare OX=4513 GN=HVA22 PE=2 SV=1 && PF03134:TB2/DP1, HVA22 family	GeBP
123092414	43.294	26.1723	24.691	463.057	298.291	194.148	31.3858	318.499	-3.34669	1.07e-16	5.22e-14	LOC123092414	NC_057804.1	411716305	411717398	+	1094	protein_coding	abscisic acid receptor PYL4-like && sp|O80920|PYL4_ARATH Abscisic acid receptor PYL4 OS=Arabidopsis thaliana OX=3702 GN=PYL4 PE=1 SV=1 && PF10604:Polyketide cyclase / dehydrase and lipid transport	MYB_related
123160812	630.403	610.376	555.053	129.697	86.5043	151.004	598.61	122.402	2.28914	1.26e-16	6.09e-14	LOC123160812	NC_057813.1	472874558	472877423	+	1442	protein_coding	GTP-binding nuclear protein Ran-3-like && sp|A2YEQ6|RAN3_ORYSI GTP-binding nuclear protein Ran-3 OS=Oryza sativa subsp. indica OX=39946 GN=RAN3 PE=2 SV=2 && PF00071:Ras family	TALE
123079749	1904.94	1288.99	1964.41	425.567	407.664	437.067	1719.45	423.432	2.02156	1.36e-16	6.56e-14	LOC123079749	NC_057802.1	470145232	470149195	+	1454	protein_coding	NADPH-dependent aldo-keto reductase%2C chloroplastic-like && sp|Q0PGJ6|AKRC9_ARATH NADPH-dependent aldo-keto reductase, chloroplastic OS=Arabidopsis thaliana OX=3702 GN=AKR4C9 PE=1 SV=1 && PF00248:Aldo/keto reductase family	FAR1
123181307	1285.09	960.898	1497.26	313.096	227.695	289.815	1247.75	276.868	2.17194	1.52e-16	7.29e-14	LOC123181307	NC_057796.1	255104517	255107743	-	1555	protein_coding	actin-2 && sp|P0C539|ACT2_ORYSI Actin-2 OS=Oryza sativa subsp. indica OX=39946 GN=ACT2 PE=3 SV=1 && PF00022:Actin	Trihelix
123145889	1691.63	1619.88	1509.11	404.288	520.02	490.528	1606.87	471.612	1.76841	1.67e-16	7.94e-14	LOC123145889	NC_057811.1	459765903	459772222	+	2431	lncRNA	uncharacterized LOC123145889 && - && -	-
123172511	1608.21	914.162	1170.35	123.617	228.69	80.6604	1230.91	144.322	3.09293	2.1e-16	9.95e-14	LOC123172511	NW_025226162.1	64608	65312	-	705	protein_coding	non-specific lipid-transfer protein 4.1-like && sp|Q43767|NLT41_HORVU Non-specific lipid-transfer protein 4.1 OS=Hordeum vulgare OX=4513 GN=LTP4.1 PE=1 SV=1 && PF00234:Protease inhibitor/seed storage/LTP family	ARF
100682479	1011.6	815.081	2084.9	173.266	194.883	135.059	1303.86	167.736	2.95885	2.57e-16	1.21e-13	LOC100682479	NC_057812.1	653539163	653540496	+	1241	protein_coding	vegetative cell wall protein gp1 && sp|Q8LC95|ENL3_ARATH Early nodulin-like protein 3 OS=Arabidopsis thaliana OX=3702 GN=At5g25090 PE=2 SV=2 && PF02298:Plastocyanin-like domain	HD-ZIP
123091534	880.663	800.125	719.001	208.73	227.695	238.229	799.93	224.885	1.8303	2.58e-16	1.21e-13	LOC123091534	NC_057804.1	146018007	146022610	-	2383	protein_coding	vacuolar-sorting receptor 1-like && sp|P93026|VSR1_ARATH Vacuolar-sorting receptor 1 OS=Arabidopsis thaliana OX=3702 GN=VSR1 PE=1 SV=2 && PF02225:PA domain	WRKY
123167272	1363.23	791.713	1800.46	170.227	199.855	248.547	1318.47	206.209	2.67613	2.88e-16	1.34e-13	LOC123167272	NC_057814.1	182606516	182611292	-	1613	protein_coding	zinc finger protein CONSTANS-LIKE 9-like%2C transcript variant X1 && sp|Q9SSE5|COL9_ARATH Zinc finger protein CONSTANS-LIKE 9 OS=Arabidopsis thaliana OX=3702 GN=COL9 PE=1 SV=1 && -	CO-like
123110482	355.855	278.548	388.142	1491.51	1387.05	1136.75	340.849	1338.44	-1.97367	2.96e-16	1.37e-13	LOC123110482	NC_057807.1	73294688	73298079	+	1714	protein_coding	probable glucan 1%2C3-beta-glucosidase A && sp|Q10444|EXG2_SCHPO Glucan 1,3-beta-glucosidase 2 OS=Schizosaccharomyces pombe (strain 972 / ATCC 24843) OX=284812 GN=exg2 PE=3 SV=1 && PF00150:Cellulase (glycosyl hydrolase family 5)	-
123088184	349.52	327.154	515.547	78.0206	78.5499	60.9642	397.407	72.5116	2.45529	3.61e-16	1.66e-13	LOC123088184	NC_057803.1	692344954	692348014	-	3061	protein_coding	arginine decarboxylase 1-like && sp|Q9SNN0|SPE1_ORYSJ Arginine decarboxylase 1 OS=Oryza sativa subsp. japonica OX=39947 GN=ADC1 PE=1 SV=1 && PF02784:Pyridoxal-dependent decarboxylase, pyridoxal binding domain	G2-like
123160938	4391.7	3494.01	6708.04	1047.7	998.28	1049.52	4864.58	1031.84	2.23708	4.13e-16	1.88e-13	LOC123160938	NC_057813.1	160296159	160302027	+	2046	protein_coding	carboxyl-terminal-processing peptidase 3%2C chloroplastic-like && sp|F4J3G5|CTPA3_ARATH Carboxyl-terminal-processing peptidase 3, chloroplastic OS=Arabidopsis thaliana OX=3702 GN=CTPA3 PE=3 SV=1 && PF17820:PDZ domain|PF03572:Peptidase family S41	HSF
123143715	206.966	225.269	193.577	713.331	898.849	715.626	208.604	775.936	-1.89485	4.42e-16	2e-13	LOC123143715	NC_057811.1	83126329	83130603	-	2163	lncRNA	uncharacterized LOC123143715%2C transcript variant X2 && - && -	-
123145442	408.653	273.875	376.29	51.676	73.5784	69.4054	352.939	64.8866	2.4421	4.49e-16	2.02e-13	LOC123145442	NC_057811.1	409523292	409525766	+	1409	protein_coding	annexin D7-like && sp|Q9LX07|ANXD7_ARATH Annexin D7 OS=Arabidopsis thaliana OX=3702 GN=ANNAT7 PE=2 SV=1 && PF00191:Annexin	MYB
123050917	102.427	100.016	528.386	1.01325	5.96581	4.68956	243.61	3.88954	5.96279	5.14e-16	2.3e-13	LOC123050917	NC_057799.1	302834	307165	+	1971	protein_coding	probable protein phosphatase 2C 37 && sp|Q7XP01|P2C37_ORYSJ Probable protein phosphatase 2C 37 OS=Oryza sativa subsp. japonica OX=39947 GN=Os04g0167900 PE=3 SV=2 && PF00481:Protein phosphatase 2C	NAC
543491	2622.98	2430.29	2617.24	472.176	387.778	745.64	2556.84	535.198	2.25581	5.41e-16	2.41e-13	LOC543491	NC_057798.1	725027275	725029630	-	1745	protein_coding	adenosylhomocysteinase-like && sp|P32112|SAHH_WHEAT Adenosylhomocysteinase OS=Triticum aestivum OX=4565 GN=SAHH PE=2 SV=1 && PF00670:S-adenosyl-L-homocysteine hydrolase, NAD binding domain|PF05221:S-adenosyl-L-homocysteine hydrolase	bHLH
123123955	19.0071	21.4987	14.8146	169.213	146.162	129.432	18.4401	148.269	-3.00541	6.88e-16	3.05e-13	LOC123123955	NC_057808.1	565265545	565270408	-	2569	protein_coding	cysteine-rich receptor-like protein kinase 10 && sp|Q0D5R2|CRK10_ORYSJ Cysteine-rich receptor-like protein kinase 10 OS=Oryza sativa subsp. japonica OX=39947 GN=CRK10 PE=2 SV=1 && PF01657:Salt stress response/antifungal|PF00069:Protein kinase domain|PF13966:zinc-binding in reverse transcriptase	bHLH
123182050	166.84	126.188	297.279	19.2518	18.8917	14.0687	196.769	17.4041	3.50103	7.05e-16	3.1e-13	LOC123182050	NC_057796.1	357744662	357749188	-	1899	protein_coding	MLO-like protein 1 && sp|O49621|MLO1_ARATH MLO-like protein 1 OS=Arabidopsis thaliana OX=3702 GN=MLO1 PE=1 SV=1 && PF03094:Mlo family	ARF
123161103	5198.45	2342.42	5772.75	653.549	605.53	807.542	4437.87	688.874	2.68741	7.09e-16	3.11e-13	LOC123161103	NC_057813.1	453548145	453552571	+	1211	protein_coding	reticulon-like protein B2 && sp|Q9SUT9|RTNLB_ARATH Reticulon-like protein B2 OS=Arabidopsis thaliana OX=3702 GN=RTNLB2 PE=1 SV=1 && PF02453:Reticulon	Dof
123125582	516.36	388.846	61.2336	7.09278	13.9202	5.62747	322.147	8.88016	5.18344	7.77e-16	3.38e-13	LOC123125582	NC_057808.1	475634284	475635891	+	1222	protein_coding	chitinase 8-like && sp|Q7XCK6|CHI8_ORYSJ Chitinase 8 OS=Oryza sativa subsp. japonica OX=39947 GN=Cht8 PE=2 SV=1 && PF00182:Chitinase class I	NAC
123097837	5328.33	3989.41	5335.22	1529	1306.51	1461.27	4884.32	1432.26	1.76982	8.09e-16	3.5e-13	LOC123097837	NC_057805.1	348359717	348364238	+	1317	protein_coding	protein IN2-1 homolog B%2C transcript variant X1 && sp|A1XBB7|IN21B_ORYSI Protein IN2-1 homolog B OS=Oryza sativa subsp. indica OX=39946 GN=GSTZ5 PE=1 SV=1 && PF13417:Glutathione S-transferase, N-terminal domain|PF13410:Glutathione S-transferase, C-terminal domain	-
123081004	1126.7	1301.14	2535.27	228.995	308.234	227.912	1654.37	255.047	2.69757	8.83e-16	3.8e-13	LOC123081004	NC_057802.1	613276897	613282560	-	1995	protein_coding	vacuolar-processing enzyme gamma-isozyme-like && sp|Q39119|VPEG_ARATH Vacuolar-processing enzyme gamma-isozyme OS=Arabidopsis thaliana OX=3702 GN=At4g32940 PE=1 SV=2 && PF01650:Peptidase C13 family	-
123150352	1406.53	854.34	2088.85	139.829	123.293	259.801	1449.91	174.308	3.05537	9.25e-16	3.95e-13	LOC123150352	NC_057812.1	191343914	191349248	-	2262	protein_coding	zinc finger protein CONSTANS-LIKE 9-like%2C transcript variant X1 && sp|Q9SSE5|COL9_ARATH Zinc finger protein CONSTANS-LIKE 9 OS=Arabidopsis thaliana OX=3702 GN=COL9 PE=1 SV=1 && PF06203:CCT motif	CO-like
123180032	139.386	135.535	170.861	1140.92	905.809	537.423	148.594	861.386	-2.53508	9.29e-16	3.95e-13	LOC123180032	NC_057796.1	22196182	22198117	+	1936	protein_coding	3-ketoacyl-CoA synthase 12-like && sp|Q9SIB2|KCS12_ARATH 3-ketoacyl-CoA synthase 12 OS=Arabidopsis thaliana OX=3702 GN=KCS12 PE=2 SV=1 && PF08392:FAE1/Type III polyketide synthase-like protein|PF08541:3-Oxoacyl-[acyl-carrier-protein (ACP)] synthase III C terminal	B3
123122326	179.512	161.708	208.392	31.4109	23.8633	30.9511	183.204	28.7417	2.67156	9.65e-16	4.08e-13	LOC123122326	NC_057808.1	424117973	424122681	-	1848	protein_coding	probable serine/threonine-protein kinase PBL19 && sp|Q9LTC0|PBL19_ARATH Probable serine/threonine-protein kinase PBL19 OS=Arabidopsis thaliana OX=3702 GN=PBL19 PE=1 SV=1 && PF07714:Protein tyrosine kinase	Whirly
542994	3847.89	1608.66	3267.11	473.19	542.889	424.874	2907.89	480.318	2.59789	9.88e-16	4.16e-13	LOC542994	NC_057814.1	16713287	16714552	+	1191	protein_coding	probable glutathione S-transferase GSTU6 && sp|Q06398|GSTU6_ORYSJ Probable glutathione S-transferase GSTU6 OS=Oryza sativa subsp. japonica OX=39947 GN=GSTU6 PE=2 SV=2 && PF13410:Glutathione S-transferase, C-terminal domain|PF13417:Glutathione S-transferase, N-terminal domain	-
123043540	470.954	254.245	174.812	26.3446	28.8348	35.6406	300.004	30.2733	3.30672	1.12e-15	4.71e-13	LOC123043540	NC_057798.1	71774995	71780537	-	1396	protein_coding	isoflavone reductase homolog && sp|P52581|IFRH_LUPAL Isoflavone reductase homolog OS=Lupinus albus OX=3870 PE=2 SV=1 && PF05368:NmrA-like family	bHLH
123143693	111.931	107.493	121.48	743.729	656.24	398.612	113.635	599.527	-2.39923	1.21e-15	5.05e-13	LOC123143693	NC_057811.1	80665437	80667251	-	1686	protein_coding	7-deoxyloganetin glucosyltransferase-like && sp|F8WKW1|UGT2_GARJA 7-deoxyloganetin glucosyltransferase OS=Gardenia jasminoides OX=114476 GN=UGT85A24 PE=1 SV=1 && PF00201:UDP-glucoronosyl and UDP-glucosyl transferase	GRAS
100037573	167.896	65.4308	142.22	6.07953	3.97721	6.56538	125.182	5.5407	4.49406	1.25e-15	5.18e-13	LOC100037573	NC_057812.1	223701312	223703381	-	1215	protein_coding	fasciclin-like arabinogalactan protein 7 && sp|Q9SJ81|FLA7_ARATH Fasciclin-like arabinogalactan protein 7 OS=Arabidopsis thaliana OX=3702 GN=FLA7 PE=2 SV=1 && PF02469:Fasciclin domain	HSF
123176732	288.275	297.243	177.775	10.1325	36.7892	13.1308	254.431	20.0175	3.66936	1.36e-15	5.58e-13	LOC123176732	NW_025239729.1	662	2230	-	1042	protein_coding	acid phosphatase 1-like && sp|P27061|PPA1_SOLLC Acid phosphatase 1 OS=Solanum lycopersicum OX=4081 GN=APS1 PE=2 SV=1 && PF03767:HAD superfamily, subfamily IIIB (Acid phosphatase)	MYB
123096144	72.8606	118.71	107.653	1.01325	4.97151	3.75165	99.7411	3.24547	4.93519	1.36e-15	5.58e-13	LOC123096144	NC_057805.1	53252982	53255934	+	1681	protein_coding	protein tas-like && sp|P0A9T4|TAS_ECOLI Protein tas OS=Escherichia coli (strain K12) OX=83333 GN=tas PE=1 SV=1 && PF00248:Aldo/keto reductase family	bHLH
123187235	253.428	183.206	214.317	890.65	723.852	972.614	216.984	862.372	-1.99175	1.39e-15	5.66e-13	LOC123187235	NC_057797.1	34664339	34670002	-	2512	protein_coding	glucose-6-phosphate 1-dehydrogenase 2%2C chloroplastic-like%2C transcript variant X1 && sp|Q9FY99|G6PD2_ARATH Glucose-6-phosphate 1-dehydrogenase 2, chloroplastic OS=Arabidopsis thaliana OX=3702 GN=G6PD2 PE=1 SV=2 && -	FAR1
123070155	182.68	198.162	203.453	669.761	654.251	627.463	194.765	650.492	-1.73939	1.51e-15	6.13e-13	LOC123070155	NC_057801.1	419816063	419820725	-	1843	protein_coding	protein SEH1-like && sp|Q93VR9|SEH1_ARATH Protein SEH1 OS=Arabidopsis thaliana OX=3702 GN=SEH1 PE=1 SV=1 && -	-
123100106	98.2034	255.18	84.9369	0	1.9886	4.68956	146.107	2.22605	6.00972	1.55e-15	6.22e-13	LOC123100106	NC_057805.1	393574300	393576480	+	1815	protein_coding	glutamate decarboxylase 1-like%2C transcript variant X1 && sp|Q42521|DCE1_ARATH Glutamate decarboxylase 1 OS=Arabidopsis thaliana OX=3702 GN=GAD1 PE=1 SV=2 && PF00282:Pyridoxal-dependent decarboxylase conserved domain	GeBP
123113817	328.401	179.467	210.367	1907.96	1108.65	1189.27	239.412	1401.96	-2.55083	1.55e-15	6.22e-13	LOC123113817	NC_057807.1	638553741	638554799	-	1059	protein_coding	chlorophyll a-b binding protein of LHCII type 1-like && sp|P04784|CB21_WHEAT Chlorophyll a-b binding protein, chloroplastic OS=Triticum aestivum OX=4565 GN=WHAB1.6 PE=3 SV=1 && PF00504:Chlorophyll A-B binding protein	ERF
123139303	478.346	337.436	353.574	59.782	27.8405	71.2813	389.785	52.9679	2.87764	1.6e-15	6.39e-13	LOC123139303	NC_057810.1	690063233	690067800	-	1404	protein_coding	probable cinnamyl alcohol dehydrogenase 5 && sp|Q0J6T3|CADH5_ORYSJ Probable cinnamyl alcohol dehydrogenase 5 OS=Oryza sativa subsp. japonica OX=39947 GN=CAD5 PE=3 SV=2 && PF08240:Alcohol dehydrogenase GroES-like domain|PF00107:Zinc-binding dehydrogenase	HB-other
123137523	5278.7	3968.85	3816.23	17503	15217.8	13628.8	4354.59	15449.8	-1.82703	1.63e-15	6.49e-13	LOC123137523	NC_057795.1	549193402	549194470	-	1069	protein_coding	chlorophyll a-b binding protein of LHCII type 1-like && sp|P07369|CB2G_SOLLC Chlorophyll a-b binding protein 3C, chloroplastic OS=Solanum lycopersicum OX=4081 GN=CAB3C PE=3 SV=1 && PF00504:Chlorophyll A-B binding protein	ERF
123043128	66.5249	41.1279	65.1841	271.552	318.177	317.952	57.6123	302.56	-2.39589	1.67e-15	6.6e-13	LOC123043128	NC_057798.1	14878276	14884830	+	2445	protein_coding	cysteine-rich receptor-like protein kinase 26 && sp|Q9LPZ9|SD113_ARATH G-type lectin S-receptor-like serine/threonine-protein kinase SD1-13 OS=Arabidopsis thaliana OX=3702 GN=SD113 PE=1 SV=2 && PF00069:Protein kinase domain	GRAS
123069244	616.675	257.984	402.956	62.8218	61.6467	54.3989	425.872	59.6225	2.83629	1.76e-15	6.91e-13	LOC123069244	NC_057801.1	178456103	178457323	-	1071	protein_coding	heme-binding protein 2-like && - && PF04832:SOUL heme-binding protein	-
123164781	236.533	194.423	351.599	23.3048	22.869	45.0197	260.852	30.3978	3.09701	1.99e-15	7.76e-13	LOC123164781	NC_057814.1	386979721	386986726	+	2239	protein_coding	external alternative NAD(P)H-ubiquinone oxidoreductase B2%2C mitochondrial-like && sp|Q94BV7|NDB2_ARATH External alternative NAD(P)H-ubiquinone oxidoreductase B2, mitochondrial OS=Arabidopsis thaliana OX=3702 GN=NDB2 PE=1 SV=1 && -	-
123191237	318.897	285.091	239.996	1.01325	0	0	281.328	0.337751	9.64403	2.27e-15	8.82e-13	LOC123191237	NC_057797.1	785429746	785430993	+	1020	lncRNA	uncharacterized LOC123191237 && - && -	-
123085100	194.295	40.1932	483.943	4.05302	1.9886	3.75165	239.477	3.26442	6.19568	2.35e-15	9.11e-13	LOC123085100	NC_057803.1	56228896	56231330	+	1624	protein_coding	branched-chain-amino-acid aminotransferase 2%2C chloroplastic-like && sp|Q9M401|BCAT3_ARATH Branched-chain-amino-acid aminotransferase 3, chloroplastic OS=Arabidopsis thaliana OX=3702 GN=BCAT3 PE=1 SV=1 && PF01063:Amino-transferase class IV	MYB_related
123051266	1806.73	1655.4	1106.15	7632.84	5404.03	6312.14	1522.76	6449.67	-2.08258	2.43e-15	9.36e-13	LOC123051266	NC_057799.1	29861064	29862526	-	852	protein_coding	ribulose bisphosphate carboxylase small subunit%2C chloroplastic 2-like && sp|P26667|RBS2_WHEAT Ribulose bisphosphate carboxylase small subunit, chloroplastic 2 OS=Triticum aestivum OX=4565 GN=RBCS2 PE=3 SV=1 && PF00101:Ribulose bisphosphate carboxylase, small chain|PF12338:Ribulose-1,5-bisphosphate carboxylase small subunit	M-type_MADS
123172507	432.94	260.789	379.253	47.6229	73.5784	64.7159	357.661	61.9724	2.52765	2.45e-15	9.38e-13	LOC123172507	NW_025226162.1	35913	36617	-	705	protein_coding	non-specific lipid-transfer protein 4.1-like && sp|Q43767|NLT41_HORVU Non-specific lipid-transfer protein 4.1 OS=Hordeum vulgare OX=4513 GN=LTP4.1 PE=1 SV=1 && PF00234:Protease inhibitor/seed storage/LTP family	ARF
123142945	19.0071	39.2585	37.5303	195.558	255.536	218.533	31.932	223.209	-2.79965	2.77e-15	1.05e-12	LOC123142945	NC_057811.1	5303700	5306025	-	1988	lncRNA	uncharacterized LOC123142945 && - && -	-
123122180	881.719	685.154	456.289	90.1796	63.6353	136.935	674.387	96.9167	2.7973	2.77e-15	1.05e-12	LOC123122180	NC_057808.1	406264401	406265948	-	1548	protein_coding	mitochondrial uncoupling protein 5-like && sp|Q9SJY5|PUMP5_ARATH Mitochondrial uncoupling protein 5 OS=Arabidopsis thaliana OX=3702 GN=PUMP5 PE=2 SV=1 && PF00153:Mitochondrial carrier protein	ERF
123138335	203.799	71.9739	149.133	10.1325	6.96012	3.75165	141.635	6.9481	4.35663	3.21e-15	1.21e-12	LOC123138335	NC_057810.1	619884672	619885821	+	1150	protein_coding	protein PHOSPHATE-INDUCED 1-like && sp|O82161|PHI1_TOBAC Protein PHOSPHATE-INDUCED 1 OS=Nicotiana tabacum OX=4097 GN=PHI-1 PE=2 SV=1 && PF04674:Phosphate-induced protein 1 conserved region	MYB
123121573	220.694	151.426	188.639	16.2121	4.97151	24.3857	186.919	15.1898	3.615	3.31e-15	1.24e-12	LOC123121573	NC_057808.1	336072277	336074268	+	1992	protein_coding	AAA-ATPase At4g25835-like && sp|Q8RY66|AATPD_ARATH AAA-ATPase At4g25835 OS=Arabidopsis thaliana OX=3702 GN=At4g25835 PE=2 SV=1 && PF00004:ATPase family associated with various cellular activities (AAA)|PF14363:Domain associated at C-terminal with AAA	NAC
123182340	122.49	72.9086	40.4932	557.29	518.032	679.048	78.6307	584.79	-2.89732	3.48e-15	1.3e-12	LOC123182340	NC_057794.1	579825780	579826607	-	708	protein_coding	protein RADIALIS-like 3 && sp|Q9SIJ5|RADL2_ARATH Protein RADIALIS-like 2 OS=Arabidopsis thaliana OX=3702 GN=RL2 PE=2 SV=1 && -	MYB_related
novel.1573	17.9512	4.67363	4.93819	180.359	102.413	196.961	9.18766	159.911	-4.1408	3.73e-15	1.39e-12	-	NC_057803.1	617679920	617681653	+	1005	-	- && - && -	-
543327	85.532	94.4073	69.1347	347.546	345.023	344.213	83.0247	345.594	-2.05689	4.46e-15	1.65e-12	LOC543327	NC_057803.1	606933450	606935154	-	1606	protein_coding	gibberellin 20 oxidase 1-A-like && sp|O04707|GAO1A_WHEAT Gibberellin 20 oxidase 1-A OS=Triticum aestivum OX=4565 GN=GA20ox1A PE=2 SV=1 && PF03171:2OG-Fe(II) oxygenase superfamily|PF14226:non-haem dioxygenase in morphine synthesis N-terminal	WRKY
123151266	114.043	58.8877	317.032	3.03976	4.97151	2.81373	163.321	3.60834	5.5027	6.06e-15	2.23e-12	LOC123151266	NC_057812.1	482367961	482369550	-	1103	protein_coding	pre-mRNA cleavage factor Im 25 kDa subunit 1-like && sp|Q94AF0|CFIS1_ARATH Pre-mRNA cleavage factor Im 25 kDa subunit 1 OS=Arabidopsis thaliana OX=3702 GN=CFIS1 PE=1 SV=1 && PF13869:Nucleotide hydrolase	EIL
123058244	178.456	97.2115	100.739	8.10603	11.9316	9.37911	125.469	9.80559	3.67604	6.3e-15	2.31e-12	LOC123058244	NC_057800.1	206927674	206928417	-	744	protein_coding	late embryogenis abundant protein 41-like && - && -	-
123168658	59.1333	29.9112	31.6044	285.738	287.353	220.409	40.2163	264.5	-2.72269	7.43e-15	2.71e-12	LOC123168658	NC_057814.1	27705980	27707268	+	1202	protein_coding	probable glutathione S-transferase GSTU6 && sp|Q06398|GSTU6_ORYSJ Probable glutathione S-transferase GSTU6 OS=Oryza sativa subsp. japonica OX=39947 GN=GSTU6 PE=2 SV=2 && PF13417:Glutathione S-transferase, N-terminal domain|PF13410:Glutathione S-transferase, C-terminal domain	-
123078816	291.442	392.585	568.88	48.6362	58.6638	84.412	417.636	63.904	2.7067	7.72e-15	2.8e-12	LOC123078816	NC_057802.1	349556111	349559335	-	1781	protein_coding	protein phosphatase 2C 50-like && sp|Q6L5H6|P2C50_ORYSJ Protein phosphatase 2C 50 OS=Oryza sativa subsp. japonica OX=39947 GN=PP2C50 PE=1 SV=1 && PF00481:Protein phosphatase 2C	NAC
123040643	1.05595	1.86945	1.97528	138.816	144.174	60.9642	1.63356	114.651	-6.12015	8.99e-15	3.25e-12	LOC123040643	NC_057798.1	101824291	101825744	-	1250	protein_coding	peroxidase 2-like && sp|A2YPX3|PER2_ORYSI Peroxidase 2 OS=Oryza sativa subsp. indica OX=39946 GN=PRX112 PE=3 SV=2 && PF00141:Peroxidase	NAC
123093887	612.452	459.885	510.609	134.763	152.128	126.618	527.649	137.836	1.93655	9.11e-15	3.28e-12	LOC123093887	NC_057804.1	652780208	652782692	+	1886	protein_coding	uncharacterized LOC123093887 && - && PF08387:FBD	-
novel.1298	437.164	231.812	138.269	6.07953	2.98291	23.4478	269.082	10.8367	4.62272	9.49e-15	3.4e-12	-	NC_057801.1	165765625	165766636	-	800	-	- && sp|A3B0Y1|MT3B_ORYSJ Metallothionein-like protein 3B OS=Oryza sativa subsp. japonica OX=39947 GN=MT3B PE=2 SV=1 && -	-
542853	367.471	414.084	134.319	2808.74	2148.69	1900.21	305.291	2285.88	-2.90439	9.65e-15	3.44e-12	LOC542853	NC_057803.1	448422494	448426095	-	1866	protein_coding	ribulose bisphosphate carboxylase/oxygenase activase B%2C chloroplastic%2C transcript variant X1 && sp|Q42450|RCAB_HORVU Ribulose bisphosphate carboxylase/oxygenase activase B, chloroplastic OS=Hordeum vulgare OX=4513 GN=RCAB PE=2 SV=1 && PF00004:ATPase family associated with various cellular activities (AAA)	Trihelix
123058062	559.654	199.097	317.032	44.5832	37.7835	45.0197	358.594	42.4621	3.07708	1.08e-14	3.83e-12	LOC123058062	NC_057800.1	107200347	107201241	-	895	protein_coding	embryo-specific protein ATS3A-like && - && PF06232:Embryo-specific protein 3, (ATS3)	-
123128712	173.176	167.316	805.913	24.3181	9.94302	15.0066	382.135	16.4226	4.54184	1.17e-14	4.12e-12	LOC123128712	NC_057809.1	585010040	585013469	+	3430	protein_coding	filaggrin-2-like && sp|P46526|CS66_WHEAT Cold shock protein CS66 OS=Triticum aestivum OX=4565 GN=CS66 PE=2 SV=1 && PF00257:Dehydrin	-
123168039	42879	56980	32060.7	11099.2	12003.2	10315.1	43973.2	11139.2	1.98099	1.21e-14	4.24e-12	LOC123168039	NC_057814.1	488001423	488006889	-	1827	protein_coding	polyamine oxidase 7-like && sp|O64411|PAO1_MAIZE Polyamine oxidase 1 OS=Zea mays OX=4577 GN=MPAO1 PE=1 SV=1 && PF01593:Flavin containing amine oxidoreductase	bHLH
123132620	1023.22	681.415	1377.76	84.1001	56.6752	187.582	1027.46	109.453	3.22913	1.22e-14	4.26e-12	LOC123132620	NC_057809.1	160744114	160747079	-	979	protein_coding	probable peroxygenase 5 && sp|A0A1I9R3Y5|PXG_PINEL Peroxygenase OS=Pinus elliottii OX=42064 PE=1 SV=1 && PF05042:Caleosin related protein	-
123164058	1053.84	1116.06	1224.67	3399.47	3422.39	2992.88	1131.52	3271.58	-1.53163	1.23e-14	4.26e-12	LOC123164058	NC_057814.1	427540322	427547561	-	3297	protein_coding	phosphoenolpyruvate carboxylase 1-like && sp|P29195|CAPP1_SORBI Phosphoenolpyruvate carboxylase 1 OS=Sorghum bicolor OX=4558 GN=PEPC PE=2 SV=1 && PF00311:Phosphoenolpyruvate carboxylase	-
123148814	397.038	158.903	607.398	34.4506	36.7892	37.5165	387.779	36.2521	3.41853	1.23e-14	4.26e-12	LOC123148814	NC_057812.1	632986865	632990878	+	2081	protein_coding	IAA-amino acid hydrolase ILR1-like 6 && sp|Q5Z678|ILL6_ORYSJ IAA-amino acid hydrolase ILR1-like 6 OS=Oryza sativa subsp. japonica OX=39947 GN=ILL6 PE=2 SV=1 && PF01546:Peptidase family M20/M25/M40	C2H2
123098292	420.268	337.436	1493.31	23.3048	32.812	69.4054	750.338	41.8408	4.16219	1.24e-14	4.29e-12	LOC123098292	NC_057805.1	419190152	419193901	-	1918	protein_coding	glucan endo-1%2C3-beta-glucosidase 1-like%2C transcript variant X1 && sp|Q94CD8|E134_ARATH Glucan endo-1,3-beta-glucosidase 4 OS=Arabidopsis thaliana OX=3702 GN=At3g13560 PE=2 SV=1 && PF00332:Glycosyl hydrolases family 17|PF07983:X8 domain	C2H2
123079278	117.211	139.274	119.504	428.607	471.299	588.07	125.33	495.992	-1.98409	1.26e-14	4.33e-12	LOC123079278	NC_057802.1	416834657	416837614	-	2242	protein_coding	protein DETOXIFICATION 32-like && sp|F4I4Q3|DTX32_ARATH Protein DETOXIFICATION 32 OS=Arabidopsis thaliana OX=3702 GN=DTX32 PE=3 SV=1 && PF01554:MatE	MYB_related
123148048	119.322	299.112	252.835	1406.4	1104.67	1526.92	223.757	1346	-2.58742	1.33e-14	4.54e-12	LOC123148048	NC_057812.1	542341539	542345824	+	2909	protein_coding	beta-galactosidase 9-like && sp|Q5Z7L0|BGAL9_ORYSJ Beta-galactosidase 9 OS=Oryza sativa subsp. japonica OX=39947 GN=Os06g0573600 PE=2 SV=1 && PF01301:Glycosyl hydrolases family 35|PF17834:Beta-sandwich domain in beta galactosidase	MYB_related
123092190	808.858	765.541	2244.9	86.1266	148.151	163.197	1273.1	132.491	3.26385	1.36e-14	4.62e-12	LOC123092190	NC_057804.1	364034761	364058268	-	2881	protein_coding	sucrose synthase 4-like && sp|Q10LP5|SUS4_ORYSJ Sucrose synthase 4 OS=Oryza sativa subsp. japonica OX=39947 GN=SUS4 PE=2 SV=1 && PF00534:Glycosyl transferases group 1|PF00862:Sucrose synthase	HB-other
123169232	190.071	193.488	418.759	32.4241	6.96012	11.2549	267.439	16.8797	3.99057	1.61e-14	5.46e-12	LOC123169232	NC_057814.1	465880411	465882788	-	2185	protein_coding	L-ascorbate oxidase-like && sp|P24792|ASO_CUCMA L-ascorbate oxidase OS=Cucurbita maxima OX=3661 GN=AAO PE=1 SV=2 && PF07732:Multicopper oxidase|PF00394:Multicopper oxidase|PF07731:Multicopper oxidase	bHLH
123179848	1491	3138.81	3088.34	401.249	424.567	576.815	2572.72	467.544	2.46001	1.7e-14	5.73e-12	LOC123179848	NC_057796.1	7627978	7639666	+	6110	protein_coding	rust resistance kinase Lr10-like%2C transcript variant X2 && sp|P93604|LRK10_WHEAT Rust resistance kinase Lr10 OS=Triticum aestivum OX=4565 GN=LRK10 PE=2 SV=1 && PF00069:Protein kinase domain	HD-ZIP
123092373	212.246	89.7337	176.787	10.1325	14.9145	16.8824	159.589	13.9765	3.50894	1.73e-14	5.8e-12	LOC123092373	NC_057804.1	403943637	403947316	+	1441	protein_coding	acetate--CoA ligase CCL3-like && sp|M4IS88|CCL3_HUMLU Acetate--CoA ligase CCL3 OS=Humulus lupulus OX=3486 GN=CCL3 PE=1 SV=1 && PF00501:AMP-binding enzyme|PF13193:AMP-binding enzyme C-terminal domain	NAC
123181917	174.232	133.666	185.676	29.3844	24.8576	23.4478	164.525	25.8966	2.66832	1.82e-14	6.1e-12	LOC123181917	NC_057796.1	342200750	342203027	-	2278	protein_coding	peptide-N4-(N-acetyl-beta-glucosaminyl)asparagine amidase A-like && sp|P81898|PNAA_PRUDU Peptide-N4-(N-acetyl-beta-glucosaminyl)asparagine amidase A OS=Prunus dulcis OX=3755 PE=1 SV=2 && PF12222:Peptide N-acetyl-beta-D-glucosaminyl asparaginase amidase A	M-type_MADS
123190642	6744.36	4568.94	4377.21	548.171	607.519	1294.32	5230.17	816.669	2.67875	1.84e-14	6.12e-12	LOC123190642	NC_057797.1	729833916	729836305	-	1751	protein_coding	adenosylhomocysteinase-like && sp|P32112|SAHH_WHEAT Adenosylhomocysteinase OS=Triticum aestivum OX=4565 GN=SAHH PE=2 SV=1 && PF00670:S-adenosyl-L-homocysteine hydrolase, NAD binding domain|PF05221:S-adenosyl-L-homocysteine hydrolase	bHLH
123052233	254.484	89.7337	96.7885	0	0	3.75165	147.002	1.25055	6.82453	2.03e-14	6.74e-12	LOC123052233	NC_057799.1	140865691	140866925	-	1117	protein_coding	LOB domain-containing protein 37-like && sp|Q9FN11|LBD37_ARATH LOB domain-containing protein 37 OS=Arabidopsis thaliana OX=3702 GN=LBD37 PE=2 SV=1 && PF03195:Lateral organ boundaries (LOB) domain	LBD
123163221	845.817	443.06	604.435	3629.48	2744.27	2486.4	631.104	2953.38	-2.22687	2.16e-14	7.14e-12	LOC123163221	NC_057813.1	121700845	121701950	+	1106	protein_coding	chlorophyll a-b binding protein of LHCII type 1-like && sp|P04784|CB21_WHEAT Chlorophyll a-b binding protein, chloroplastic OS=Triticum aestivum OX=4565 GN=WHAB1.6 PE=3 SV=1 && PF00504:Chlorophyll A-B binding protein	ERF
123086513	475.178	169.185	191.602	0	0	0.937911	278.655	0.312637	9.62965	2.23e-14	7.33e-12	LOC123086513	NC_057795.1	56583062	56583896	+	733	protein_coding	defensin-like protein CAL1 && sp|Q6K209|CAL1_ORYSJ Defensin-like protein CAL1 OS=Oryza sativa subsp. japonica OX=39947 GN=CAL1 PE=1 SV=1 && -	-
123141816	96.0915	166.381	158.022	545.131	978.393	1386.23	140.165	969.919	-2.78983	2.27e-14	7.44e-12	LOC123141816	NC_057795.1	605429278	605430936	+	1536	protein_coding	phospholipase A1-II 7-like && sp|A2Y7R2|PLA7_ORYSI Phospholipase A1-II 7 OS=Oryza sativa subsp. indica OX=39946 GN=OsI_21081 PE=3 SV=1 && PF01764:Lipase (class 3)	Trihelix
123160552	173.176	149.556	177.775	705.225	517.037	813.169	166.836	678.477	-2.02447	2.35e-14	7.63e-12	LOC123160552	NC_057813.1	618266653	618269455	-	1059	protein_coding	carbonic anhydrase%2C chloroplastic-like && sp|P40880|CAHC_HORVU Carbonic anhydrase, chloroplastic OS=Hordeum vulgare OX=4513 PE=2 SV=1 && PF00484:Carbonic anhydrase	bHLH
123061731	263.988	238.355	332.834	46.6097	51.7037	67.5296	278.392	55.281	2.33033	2.36e-14	7.63e-12	LOC123061731	NC_057800.1	478643904	478647134	-	1795	protein_coding	protein phosphatase 2C 50-like && sp|Q6L5H6|P2C50_ORYSJ Protein phosphatase 2C 50 OS=Oryza sativa subsp. japonica OX=39947 GN=PP2C50 PE=1 SV=1 && PF00481:Protein phosphatase 2C	NAC
123096561	277.715	308.46	861.221	49.6495	36.7892	54.3989	482.465	46.9458	3.36089	2.36e-14	7.63e-12	LOC123096561	NC_057805.1	110295222	110303793	+	3605	protein_coding	protein ZINC INDUCED FACILITATOR-LIKE 1-like%2C transcript variant X3 && sp|Q94BZ1|ZIFL1_ARATH Protein ZINC INDUCED FACILITATOR-LIKE 1 OS=Arabidopsis thaliana OX=3702 GN=ZIFL1 PE=2 SV=1 && PF07690:Major Facilitator Superfamily	LBD
123104450	365.359	176.663	750.605	22.2916	18.8917	46.8956	430.876	29.3596	3.87211	2.41e-14	7.75e-12	LOC123104450	NC_057806.1	520651537	520653451	+	1915	protein_coding	serine carboxypeptidase-like 2 && sp|Q9C7Z9|SCP18_ARATH Serine carboxypeptidase-like 18 OS=Arabidopsis thaliana OX=3702 GN=SCPL18 PE=2 SV=2 && PF00450:Serine carboxypeptidase	C3H
123150963	3589.18	2035.83	1414.3	413.408	412.635	408.929	2346.44	411.658	2.51085	2.88e-14	9.24e-12	LOC123150963	NC_057812.1	19693338	19694971	+	1160	protein_coding	acid phosphatase 1-like && sp|P27061|PPA1_SOLLC Acid phosphatase 1 OS=Solanum lycopersicum OX=4081 GN=APS1 PE=2 SV=1 && PF03767:HAD superfamily, subfamily IIIB (Acid phosphatase)	MYB
123125412	202.743	103.755	61.2336	6.07953	1.9886	0.937911	122.577	3.00201	5.36885	3.12e-14	9.95e-12	LOC123125412	NC_057808.1	444620863	444622396	+	1383	protein_coding	chlorophyllase-2-like && sp|O22527|CLH1_ARATH Chlorophyllase-1 OS=Arabidopsis thaliana OX=3702 GN=CLH1 PE=1 SV=1 && PF12740:Chlorophyllase enzyme	-
123134001	279.827	217.791	530.362	28.3711	21.8747	53.4609	342.66	34.5689	3.30596	3.17e-14	1.01e-11	LOC123134001	NC_057810.1	222787160	222790070	+	1031	protein_coding	probable peroxygenase 5 && sp|A0A1I9R3Y5|PXG_PINEL Peroxygenase OS=Pinus elliottii OX=42064 PE=1 SV=1 && PF05042:Caleosin related protein	-
123167622	232.309	106.559	414.808	18.2386	10.9373	23.4478	251.225	17.5412	3.83746	3.26e-14	1.03e-11	LOC123167622	NC_057814.1	158788152	158791622	+	1745	protein_coding	pyruvate dehydrogenase E1 component subunit alpha-2%2C mitochondrial-like && sp|Q654V6|ODPA2_ORYSJ Pyruvate dehydrogenase E1 component subunit alpha-2, mitochondrial OS=Oryza sativa subsp. japonica OX=39947 GN=Os06g0246500 PE=2 SV=1 && PF00676:Dehydrogenase E1 component	E2F/DP
123113236	2893.31	3041.6	4613.26	682.933	1023.14	780.342	3516.05	828.804	2.08487	3.35e-14	1.06e-11	LOC123113236	NC_057807.1	561689596	561694302	-	2709	protein_coding	organic cation/carnitine transporter 7-like%2C transcript variant X2 && sp|Q940M4|OCT7_ARATH Organic cation/carnitine transporter 7 OS=Arabidopsis thaliana OX=3702 GN=OCT7 PE=2 SV=1 && PF07690:Major Facilitator Superfamily	-
123119189	7163.57	7676.9	8376.16	21181.1	19835.3	21812.1	7738.88	20942.8	-1.43625	3.37e-14	1.06e-11	LOC123119189	NC_057808.1	25594468	25598500	+	1400	protein_coding	cysteine synthase-like && sp|P38076|CYSK_WHEAT Cysteine synthase OS=Triticum aestivum OX=4565 GN=CYS1 PE=2 SV=1 && PF00291:Pyridoxal-phosphate dependent enzyme	GeBP
123076919	688.48	388.846	309.131	46.6097	84.5157	64.7159	462.152	65.2804	2.82284	3.43e-14	1.07e-11	LOC123076919	NC_057802.1	15953074	15953878	+	805	protein_coding	probable calcium-binding protein CML16 && sp|Q5ZCK5|CML16_ORYSJ Probable calcium-binding protein CML16 OS=Oryza sativa subsp. japonica OX=39947 GN=CML16 PE=2 SV=1 && PF13499:EF-hand domain pair	HSF
123167101	121.434	113.102	184.688	1093.3	555.815	715.626	139.742	788.248	-2.49584	3.51e-14	1.09e-11	LOC123167101	NC_057814.1	124876138	124879056	+	1681	protein_coding	WAT1-related protein At1g44800-like && sp|Q9LPF1|WTR8_ARATH WAT1-related protein At1g44800 OS=Arabidopsis thaliana OX=3702 GN=At1g44800 PE=1 SV=1 && PF00892:EamA-like transporter family	ERF
123113352	1052.78	1053.44	1078.5	392.129	351.983	340.462	1061.57	361.525	1.55425	3.66e-14	1.13e-11	LOC123113352	NC_057807.1	577880969	577884354	-	1944	protein_coding	COBRA-like protein 3 && sp|Q60E70|COBL3_ORYSJ COBRA-like protein 3 OS=Oryza sativa subsp. japonica OX=39947 GN=BC1L4 PE=2 SV=1 && PF04833:COBRA-like protein	C2H2
123111337	642.018	564.574	1202.94	107.405	167.043	124.742	803.179	133.063	2.59359	4.39e-14	1.35e-11	LOC123111337	NC_057807.1	273740987	273746002	+	1813	protein_coding	ethanolamine-phosphate cytidylyltransferase-like && sp|Q9ZVI9|PECT1_ARATH Ethanolamine-phosphate cytidylyltransferase OS=Arabidopsis thaliana OX=3702 GN=PECT1 PE=1 SV=1 && PF01467:Cytidylyltransferase-like	FAR1
123085039	147.833	170.12	395.055	17.2253	8.94872	27.1994	237.67	17.7912	3.73578	4.63e-14	1.42e-11	LOC123085039	NC_057803.1	45151360	45156631	+	1902	protein_coding	glucan endo-1%2C3-beta-glucosidase 4-like && sp|Q9ZU91|E133_ARATH Glucan endo-1,3-beta-glucosidase 3 OS=Arabidopsis thaliana OX=3702 GN=At2g01630 PE=2 SV=2 && PF07983:X8 domain|PF00332:Glycosyl hydrolases family 17	C2H2
123093269	233.365	718.804	710.112	36.4772	80.5385	38.4544	554.094	51.8233	3.41933	4.69e-14	1.44e-11	LOC123093269	NC_057804.1	564002833	564006621	-	1463	protein_coding	protein SULFUR DEFICIENCY-INDUCED 2-like && sp|Q8L730|SDI2_ARATH Protein SULFUR DEFICIENCY-INDUCED 2 OS=Arabidopsis thaliana OX=3702 GN=At1g04770 PE=2 SV=1 && -	-
123058524	0	0	0.987638	353.626	122.299	275.746	0.329213	250.557	-9.46211	4.75e-14	1.45e-11	LOC123058524	NC_057800.1	518937744	518940489	+	1569	protein_coding	8-amino-7-oxononanoate synthase-like && sp|Q8GW43|BIOF_ARATH 8-amino-7-oxononanoate synthase OS=Arabidopsis thaliana OX=3702 GN=BIOF PE=1 SV=2 && PF00155:Aminotransferase class I and II	-
123147811	162.616	243.963	228.144	0	0.994302	0	211.575	0.331434	9.23378	5.03e-14	1.53e-11	LOC123147811	NC_057812.1	499730123	499731772	-	1344	protein_coding	probable WRKY transcription factor 62 && sp|K4BIZ9|WRK70_SOLLC WRKY DNA-binding transcription factor 70 OS=Solanum lycopersicum OX=4081 GN=WRKY70 PE=2 SV=1 && PF03106:WRKY DNA -binding domain	WRKY
123169615	115.099	149.556	123.455	437.726	467.322	546.802	129.37	483.95	-1.90237	5.07e-14	1.53e-11	LOC123169615	NC_057814.1	565361637	565364537	-	1151	protein_coding	carbonic anhydrase%2C chloroplastic-like && sp|P40880|CAHC_HORVU Carbonic anhydrase, chloroplastic OS=Hordeum vulgare OX=4513 PE=2 SV=1 && PF00484:Carbonic anhydrase	bHLH
123189403	1612.44	913.227	1012.33	277.632	285.365	271.056	1179.33	278.018	2.08448	5.51e-14	1.66e-11	LOC123189403	NC_057797.1	558370026	558371124	-	1013	protein_coding	PLAT domain-containing protein 1-like && sp|O65660|PLAT1_ARATH PLAT domain-containing protein 1 OS=Arabidopsis thaliana OX=3702 GN=PLAT1 PE=1 SV=1 && PF01477:PLAT/LH2 domain	-
123091654	514.248	403.802	1177.26	87.1399	62.641	103.17	698.438	84.3171	3.04966	5.82e-14	1.75e-11	LOC123091654	NC_057804.1	174846263	174856552	+	2407	protein_coding	protein ZINC INDUCED FACILITATOR-LIKE 1-like%2C transcript variant X4 && sp|Q94BZ1|ZIFL1_ARATH Protein ZINC INDUCED FACILITATOR-LIKE 1 OS=Arabidopsis thaliana OX=3702 GN=ZIFL1 PE=2 SV=1 && PF07690:Major Facilitator Superfamily	LBD
123092992	715.935	167.316	179.75	26.3446	21.8747	16.8824	354.334	21.7006	4.0302	6.3e-14	1.88e-11	LOC123092992	NC_057804.1	513689327	513689948	-	622	protein_coding	uncharacterized LOC123092992 && - && -	-
123063611	2210.11	2268.58	531.349	136.789	210.792	103.17	1670.01	150.251	3.47473	6.6e-14	1.97e-11	LOC123063611	NC_057800.1	735489408	735490162	+	755	protein_coding	wheatwin-1 && sp|O64392|WHW1_WHEAT Wheatwin-1 OS=Triticum aestivum OX=4565 GN=PR4A PE=1 SV=1 && PF00967:Barwin family	-
123050885	3.16785	0.934726	5.92583	57.7555	103.407	196.961	3.3428	119.375	-5.16999	7.02e-14	2.08e-11	LOC123050885	NC_057799.1	656223581	656225084	+	1504	protein_coding	peroxidase 47-like && sp|Q9SZB9|PER47_ARATH Peroxidase 47 OS=Arabidopsis thaliana OX=3702 GN=PER47 PE=2 SV=2 && PF00141:Peroxidase	NAC
123091621	5297.71	6721.61	5613.74	16421.8	16300.6	16662.9	5877.69	16461.8	-1.48576	7.29e-14	2.16e-11	LOC123091621	NC_057804.1	170723002	170730419	-	2525	protein_coding	alpha-L-arabinofuranosidase 1-like%2C transcript variant X1 && sp|Q9SG80|ASD1_ARATH Alpha-L-arabinofuranosidase 1 OS=Arabidopsis thaliana OX=3702 GN=ASD1 PE=1 SV=1 && PF06964:Alpha-L-arabinofuranosidase C-terminal domain	GRAS
123050211	96.0915	117.775	56.2954	1.01325	2.98291	3.75165	90.0541	2.5826	5.11112	7.4e-14	2.18e-11	LOC123050211	NC_057799.1	590167730	590169806	-	2077	protein_coding	UDP-glycosyltransferase 88A1-like && sp|D3UAG0|U71K1_MALDO UDP-glycosyltransferase 71K1 OS=Malus domestica OX=3750 GN=UGT71K1 PE=1 SV=1 && -	bHLH
123103511	2078.11	2281.67	2006.88	5626.6	6914.38	5713.76	2122.22	6084.91	-1.51962	7.42e-14	2.18e-11	LOC123103511	NC_057806.1	384381490	384384635	-	1238	protein_coding	putative glucose-6-phosphate 1-epimerase && sp|P39173|YEAD_ECOLI Putative glucose-6-phosphate 1-epimerase OS=Escherichia coli (strain K12) OX=83333 GN=yeaD PE=1 SV=2 && PF01263:Aldose 1-epimerase	NAC
123115823	293.554	148.621	253.823	28.3711	9.94302	31.889	232	23.401	3.30671	7.82e-14	2.29e-11	LOC123115823	NC_057795.1	203813732	203814941	+	1210	protein_coding	NDR1/HIN1-like protein 13 && - && PF03168:Late embryogenesis abundant protein	G2-like
123104153	151.001	95.342	134.319	14.1856	16.9031	15.9445	126.887	15.6777	3.01508	8.42e-14	2.45e-11	LOC123104153	NC_057806.1	476886356	476887629	+	1274	protein_coding	PRELI domain containing protein 3A-like && - && PF04707:PRELI-like family	C2H2
123062739	99.2594	76.6475	225.182	6.07953	8.94872	8.4412	133.696	7.82315	4.09302	8.75e-14	2.54e-11	LOC123062739	NC_057800.1	631206503	631210707	+	1564	protein_coding	magnesium transporter MRS2-E-like && sp|A2WXD3|MRS2E_ORYSI Magnesium transporter MRS2-E OS=Oryza sativa subsp. indica OX=39946 GN=MRS2-E PE=3 SV=1 && -	bHLH
123103751	494.185	461.755	479.992	137.803	115.339	154.755	478.644	135.966	1.81502	9.53e-14	2.75e-11	LOC123103751	NC_057806.1	425708560	425710282	+	1417	protein_coding	probable cinnamyl alcohol dehydrogenase 8D && sp|Q6ERW9|CAD8B_ORYSJ Probable cinnamyl alcohol dehydrogenase 8B OS=Oryza sativa subsp. japonica OX=39947 GN=CAD8B PE=3 SV=2 && PF00107:Zinc-binding dehydrogenase|PF08240:Alcohol dehydrogenase GroES-like domain	HB-other
123167305	14237.4	5730.8	4324.87	1104.45	1154.38	1043.9	8097.69	1100.91	2.87879	9.7e-14	2.79e-11	LOC123167305	NC_057814.1	19132211	19133878	+	1135	protein_coding	acid phosphatase 1-like && sp|P27061|PPA1_SOLLC Acid phosphatase 1 OS=Solanum lycopersicum OX=4081 GN=APS1 PE=2 SV=1 && PF03767:HAD superfamily, subfamily IIIB (Acid phosphatase)	MYB
123045265	228.085	128.992	305.18	26.3446	9.94302	27.1994	220.753	21.1624	3.38089	1.1e-13	3.15e-11	LOC123045265	NC_057798.1	421720871	421724579	+	2262	protein_coding	protein DETOXIFICATION 16-like%2C transcript variant X2 && sp|Q9FHB6|DTX16_ARATH Protein DETOXIFICATION 16 OS=Arabidopsis thaliana OX=3702 GN=DTX16 PE=2 SV=1 && PF01554:MatE	B3
123058066	61.2452	57.953	63.2088	390.103	338.063	215.72	60.8023	314.628	-2.37124	1.11e-13	3.16e-11	LOC123058066	NC_057794.1	474189002	474191194	+	2193	protein_coding	cytochrome P450 94C1-like && sp|Q9ZUX1|C94C1_ARATH Cytochrome P450 94C1 OS=Arabidopsis thaliana OX=3702 GN=CYP94C1 PE=1 SV=1 && PF00067:Cytochrome P450	C2H2
123099302	5.27975	4.67363	1.97528	106.392	60.6524	90.9774	3.97622	86.0072	-4.43875	1.21e-13	3.46e-11	LOC123099302	NC_057795.1	666282283	666283527	+	994	protein_coding	protein RADIALIS-like 3 && sp|Q8GW75|RADL5_ARATH Protein RADIALIS-like 5 OS=Arabidopsis thaliana OX=3702 GN=RL5 PE=3 SV=1 && -	MYB_related
123085463	36.9583	21.4987	27.6539	156.041	207.809	164.134	28.7036	175.995	-2.62145	1.25e-13	3.56e-11	LOC123085463	NC_057803.1	110975167	110976276	-	1035	protein_coding	cysteine-rich repeat secretory protein 55-like%2C transcript variant X1 && sp|Q9LV60|CRR55_ARATH Cysteine-rich repeat secretory protein 55 OS=Arabidopsis thaliana OX=3702 GN=CRRSP55 PE=2 SV=1 && PF01657:Salt stress response/antifungal	G2-like
123092868	255.54	237.42	511.597	48.6362	53.6923	50.6472	334.852	50.9919	2.71515	1.29e-13	3.65e-11	LOC123092868	NC_057804.1	486939255	486945030	+	2008	protein_coding	cytochrome P450 90B2 && sp|Q5CCK3|C90B2_ORYSJ Cytochrome P450 90B2 OS=Oryza sativa subsp. japonica OX=39947 GN=CYP90B2 PE=1 SV=1 && PF00067:Cytochrome P450	GATA
123131001	166.84	105.624	161.973	22.2916	20.8803	16.8824	144.812	20.0181	2.85592	1.46e-13	4.11e-11	LOC123131001	NC_057809.1	554601243	554602893	-	1651	protein_coding	E3 ubiquitin-protein ligase ATL31-like && sp|Q8LGA5|ATL31_ARATH E3 ubiquitin-protein ligase ATL31 OS=Arabidopsis thaliana OX=3702 GN=ATL31 PE=1 SV=2 && PF13639:Ring finger domain	C3H
123187227	732.83	617.854	474.066	2342.64	1955.79	2008.07	608.25	2102.17	-1.78936	1.46e-13	4.11e-11	LOC123187227	NC_057797.1	34595794	34597279	-	873	protein_coding	ribulose bisphosphate carboxylase small subunit%2C chloroplastic 2-like && sp|P26667|RBS2_WHEAT Ribulose bisphosphate carboxylase small subunit, chloroplastic 2 OS=Triticum aestivum OX=4565 GN=RBCS2 PE=3 SV=1 && PF00101:Ribulose bisphosphate carboxylase, small chain	M-type_MADS
123106017	279.827	221.53	416.783	49.6495	61.6467	56.2747	306.047	55.857	2.4535	1.56e-13	4.36e-11	LOC123106017	NC_057806.1	689010975	689015091	-	1748	protein_coding	uncharacterized LOC123106017%2C transcript variant X1 && - && PF12697:Alpha/beta hydrolase family	GRAS
123119482	1051.73	1192.71	987.638	5019.66	4393.82	2886.89	1077.36	4100.12	-1.92805	1.57e-13	4.38e-11	LOC123119482	NC_057808.1	65925720	65930396	-	1342	protein_coding	light-inducible protein CPRF2-like%2C transcript variant X2 && sp|Q99090|CPRF2_PETCR Light-inducible protein CPRF2 OS=Petroselinum crispum OX=4043 GN=CPRF2 PE=2 SV=2 && PF00170:bZIP transcription factor|PF12498:Basic leucine-zipper C terminal	bZIP
123164555	696.928	455.212	1500.22	82.0736	88.4929	140.687	884.121	103.751	3.09021	1.6e-13	4.43e-11	LOC123164555	NC_057814.1	613799931	613805802	+	2125	protein_coding	probable plastidic glucose transporter 3%2C transcript variant X1 && sp|Q9FYG3|PLST2_ARATH Probable plastidic glucose transporter 2 OS=Arabidopsis thaliana OX=3702 GN=At1g67300 PE=2 SV=1 && PF00083:Sugar (and other) transporter	GRAS
123190600	51.7416	123.384	125.43	2.02651	2.98291	6.56538	100.185	3.85826	4.68522	1.69e-13	4.68e-11	LOC123190600	NC_057797.1	725910889	725912745	-	1857	protein_coding	UDP-glycosyltransferase 88A1-like && sp|Q4R1I9|ANGLT_ROSHC Anthocyanidin 5,3-O-glucosyltransferase OS=Rosa hybrid cultivar OX=128735 GN=RhGT1 PE=2 SV=1 && PF00201:UDP-glucoronosyl and UDP-glucosyl transferase	bHLH
123072755	762.397	332.762	238.021	19.2518	55.6809	42.206	444.393	39.0463	3.50714	1.71e-13	4.71e-11	LOC123072755	NC_057801.1	830882608	830883330	+	723	protein_coding	wheatwin-2-like && sp|O64393|WHW2_WHEAT Wheatwin-2 OS=Triticum aestivum OX=4565 GN=PR4B PE=1 SV=1 && PF00967:Barwin family	-
123130325	574.437	164.512	2091.82	3.03976	2.98291	4.68956	943.589	3.57074	8.04299	1.89e-13	5.18e-11	LOC123130325	NC_057795.1	445420590	445423337	+	2245	protein_coding	eukaryotic peptide chain release factor subunit 1-2-like%2C transcript variant X1 && sp|Q9LPV8|ERF1Y_ARATH Eukaryotic peptide chain release factor subunit 1-2 OS=Arabidopsis thaliana OX=3702 GN=ERF1-2 PE=1 SV=1 && PF03463:eRF1 domain 1|PF03465:eRF1 domain 3|PF03464:eRF1 domain 2	SBP
123113787	120.378	183.206	165.923	657.602	544.878	570.25	156.503	590.91	-1.9152	1.89e-13	5.18e-11	LOC123113787	NC_057807.1	632156282	632162960	-	2970	protein_coding	putative chloride channel-like protein CLC-g && sp|P60300|CLCG_ARATH Putative chloride channel-like protein CLC-g OS=Arabidopsis thaliana OX=3702 GN=CLC-G PE=1 SV=2 && PF00654:Voltage gated chloride channel	-
123092844	117.211	175.728	58.2707	0	0	4.68956	117.07	1.56319	6.17883	1.95e-13	5.3e-11	LOC123092844	NC_057804.1	482533965	482536436	-	1909	protein_coding	glutamate decarboxylase 1-like && sp|Q42521|DCE1_ARATH Glutamate decarboxylase 1 OS=Arabidopsis thaliana OX=3702 GN=GAD1 PE=1 SV=2 && PF00282:Pyridoxal-dependent decarboxylase conserved domain	GeBP
123144374	743.389	975.854	1596.02	144.895	184.94	255.112	1105.09	194.982	2.50219	1.96e-13	5.31e-11	LOC123144374	NC_057811.1	178781566	178783589	-	1799	protein_coding	pectate lyase-like && sp|P40973|PLY_LILLO Pectate lyase OS=Lilium longiflorum OX=4690 PE=2 SV=1 && -	HD-ZIP
123103635	805.691	973.984	964.923	295.87	225.707	300.132	914.866	273.903	1.73989	1.97e-13	5.32e-11	LOC123103635	NC_057806.1	403493161	403497768	-	2980	transcribed_pseudogene	potassium transporter 23-like && sp|Q6H4R6|HAK23_ORYSJ Potassium transporter 23 OS=Oryza sativa subsp. japonica OX=39947 GN=HAK23 PE=2 SV=1 && -	C3H
123144745	7.39166	22.4334	20.7404	137.803	144.174	149.128	16.8552	143.701	-3.08165	1.99e-13	5.38e-11	LOC123144745	NC_057811.1	296871886	296880724	-	5211	protein_coding	transcription factor bHLH128-like%2C transcript variant X1 && sp|Q8H102|BH128_ARATH Transcription factor bHLH128 OS=Arabidopsis thaliana OX=3702 GN=BHLH128 PE=1 SV=1 && PF00010:Helix-loop-helix DNA-binding domain	bHLH
123045960	164.728	196.292	170.861	585.661	663.2	528.982	177.294	592.614	-1.74015	2.06e-13	5.53e-11	LOC123045960	NC_057798.1	548646228	548650400	+	1121	protein_coding	adenine phosphoribosyltransferase 2-like && sp|Q42563|APT2_ARATH Adenine phosphoribosyltransferase 2 OS=Arabidopsis thaliana OX=3702 GN=APT2 PE=1 SV=1 && PF00156:Phosphoribosyl transferase domain	bHLH
123096104	15.8393	7.47781	13.8269	175.293	180.963	78.7846	12.3813	145.014	-3.55683	2.06e-13	5.53e-11	LOC123096104	NC_057805.1	48597268	48598895	-	1531	protein_coding	flavonoid O-methyltransferase-like protein Os11g0303600 && sp|Q53QK0|Y1103_ORYSJ Flavonoid O-methyltransferase-like protein Os11g0303600 OS=Oryza sativa subsp. japonica OX=39947 GN=Os11g0303600 PE=2 SV=1 && PF00891:O-methyltransferase domain|PF08100:Dimerisation domain	-
123138046	261.876	134.601	188.639	6.07953	15.9088	28.1373	195.038	16.7086	3.53691	2.09e-13	5.57e-11	LOC123138046	NC_057810.1	568300698	568310007	+	918	protein_coding	universal stress protein A-like protein && sp|Q8LGG8|USPAL_ARATH Universal stress protein A-like protein OS=Arabidopsis thaliana OX=3702 GN=At3g01520 PE=1 SV=2 && PF00582:Universal stress protein family	-
novel.2084	0	4.67363	12.8393	106.392	120.311	132.246	5.83764	119.649	-4.34393	2.12e-13	5.65e-11	-	NC_057806.1	488448929	488450389	-	838	-	- && sp|Q6NNN0|RADL3_ARATH Protein RADIALIS-like 3 OS=Arabidopsis thaliana OX=3702 GN=RL3 PE=2 SV=1 && -	MYB_related
100038338	627.235	364.543	996.527	65.8615	96.4473	118.177	662.768	93.4952	2.82445	2.13e-13	5.65e-11	LOC100038338	NC_057799.1	593985716	593990379	+	1462	protein_coding	abscisic acid-inducible protein kinase-like%2C transcript variant X2 && sp|Q02066|AAIP_WHEAT Abscisic acid-inducible protein kinase (Fragment) OS=Triticum aestivum OX=4565 PE=2 SV=1 && PF00069:Protein kinase domain	LBD
123077847	53.8535	100.016	418.759	3.03976	6.96012	3.75165	190.876	4.58384	5.38102	2.17e-13	5.74e-11	LOC123077847	NC_057802.1	129079842	129085949	-	3205	protein_coding	uncharacterized LOC123077847 && sp|Q6NW58|SPAST_DANRE Spastin OS=Danio rerio OX=7955 GN=spast PE=2 SV=2 && -	Trihelix
123129016	88.6999	74.7781	144.195	9.11929	7.95442	7.50329	102.558	8.19233	3.64756	2.26e-13	5.95e-11	LOC123129016	NC_057809.1	610849042	610854340	-	2562	protein_coding	P-loop NTPase domain-containing protein LPA1-like && sp|B9F4I8|LPA1_ORYSJ P-loop NTPase domain-containing protein LPA1 OS=Oryza sativa subsp. japonica OX=39947 GN=LPA1 PE=2 SV=1 && PF13671:AAA domain	-
123166012	530.087	730.021	799.987	2318.33	2684.62	2102.8	686.698	2368.58	-1.78594	2.37e-13	6.21e-11	LOC123166012	NC_057814.1	210621841	210624760	-	2133	protein_coding	tonoplast dicarboxylate transporter-like && sp|Q8LG88|TDT_ARATH Tonoplast dicarboxylate transporter OS=Arabidopsis thaliana OX=3702 GN=TDT PE=2 SV=2 && PF00939:Sodium:sulfate symporter transmembrane region	-
542941	591.333	866.491	154.072	0	0	0	537.298	0	11.5395	2.38e-13	6.21e-11	LOC542941	NC_057814.1	1197666	1199279	-	1266	protein_coding	uncharacterized LOC542941 && sp|P18674|LECA_MACPO Agglutinin alpha chain OS=Maclura pomifera OX=3496 PE=1 SV=2 && PF01419:Jacalin-like lectin domain|PF03018:Dirigent-like protein	B3
123122744	4899.61	4394.15	7379.63	1359.79	1609.78	1535.36	5557.8	1501.64	1.88795	2.39e-13	6.21e-11	LOC123122744	NC_057808.1	459468040	459472995	-	3017	protein_coding	organic cation/carnitine transporter 7-like%2C transcript variant X3 && sp|Q940M4|OCT7_ARATH Organic cation/carnitine transporter 7 OS=Arabidopsis thaliana OX=3702 GN=OCT7 PE=2 SV=1 && PF07690:Major Facilitator Superfamily	C2H2
123093412	57.0214	32.7154	35.555	245.208	332.097	192.272	41.7639	256.525	-2.62256	2.39e-13	6.21e-11	LOC123093412	NC_057804.1	585096291	585097541	-	1251	protein_coding	ethylene-responsive transcription factor ERF112-like && sp|Q8H0T5|ERF73_ARATH Ethylene-responsive transcription factor ERF073 OS=Arabidopsis thaliana OX=3702 GN=ERF073 PE=1 SV=2 && PF00847:AP2 domain	ERF
123172506	1146.76	545.88	713.075	79.0338	175.992	77.8466	801.906	110.957	2.8536	2.54e-13	6.57e-11	LOC123172506	NW_025226161.1	123860	124586	+	727	protein_coding	non-specific lipid-transfer protein 4.1-like && sp|Q43767|NLT41_HORVU Non-specific lipid-transfer protein 4.1 OS=Hordeum vulgare OX=4513 GN=LTP4.1 PE=1 SV=1 && PF00234:Protease inhibitor/seed storage/LTP family	ARF
123142946	24.2869	29.9112	19.7528	127.67	176.986	156.631	24.6503	153.762	-2.63899	2.57e-13	6.63e-11	LOC123142946	NC_057811.1	5320549	5329826	-	6443	protein_coding	disease resistance protein RGA5-like%2C transcript variant X4 && sp|Q2R8L1|RGA5S_ORYSJ Disease resistance protein RGA5 OS=Oryza sativa subsp. japonica OX=39947 GN=RGA5 PE=2 SV=1 && -	WRKY
123064776	270.323	263.593	251.848	821.749	744.732	739.074	261.921	768.519	-1.55298	2.58e-13	6.63e-11	LOC123064776	NC_057794.1	541515698	541519650	+	1597	protein_coding	probable choline kinase 2 && sp|Q8L518|CK2_ARATH Probable choline kinase 2 OS=Arabidopsis thaliana OX=3702 GN=At1g74320 PE=2 SV=1 && PF01633:Choline/ethanolamine kinase	HD-ZIP
778392	317.841	240.225	1156.52	37.4904	54.6866	30.9511	571.53	41.0427	3.80033	2.7e-13	6.92e-11	LOC778392	NC_057813.1	619637127	619638471	+	1241	protein_coding	vegetative cell wall protein gp1 && sp|Q8LC95|ENL3_ARATH Early nodulin-like protein 3 OS=Arabidopsis thaliana OX=3702 GN=At5g25090 PE=2 SV=2 && PF02298:Plastocyanin-like domain	HD-ZIP
123150153	257.652	224.334	86.9122	0	1.9886	0	189.633	0.662868	8.17786	2.78e-13	7.09e-11	LOC123150153	NC_057812.1	4132042	4135045	-	2297	protein_coding	sucrose_sucrose 1-fructosyltransferase-like && sp|Q9FSV7|SST_FESAR Sucrose:sucrose 1-fructosyltransferase OS=Festuca arundinacea OX=4606 GN=1-SST PE=1 SV=1 && PF00251:Glycosyl hydrolases family 32 N-terminal domain|PF11837:Domain of unknown function (DUF3357)|PF08244:Glycosyl hydrolases family 32 C terminal	-
123148751	0	0	0	68.9013	84.5157	228.85	0	127.422	-9.44937	2.85e-13	7.26e-11	LOC123148751	NC_057812.1	625339307	625370341	+	827	protein_coding	uncharacterized LOC123148751%2C transcript variant X1 && - && -	MYB_related
123051108	364.303	307.525	430.61	95.2459	94.4587	98.4807	367.479	96.0618	1.93526	3.02e-13	7.67e-11	LOC123051108	NC_057799.1	13738165	13744489	+	1811	protein_coding	acetyl-CoA acetyltransferase%2C cytosolic 1-like%2C transcript variant X1 && sp|Q8S4Y1|THIC1_ARATH Acetyl-CoA acetyltransferase, cytosolic 1 OS=Arabidopsis thaliana OX=3702 GN=AAT1 PE=1 SV=1 && PF00108:Thiolase, N-terminal domain|PF02803:Thiolase, C-terminal domain	NF-YB
123070364	404.429	415.018	669.619	72.9543	115.339	109.736	496.355	99.343	2.32025	3.08e-13	7.77e-11	LOC123070364	NC_057801.1	461047377	461050701	-	1939	protein_coding	protein phosphatase 2C 50-like%2C transcript variant X1 && sp|Q6L5H6|P2C50_ORYSJ Protein phosphatase 2C 50 OS=Oryza sativa subsp. japonica OX=39947 GN=PP2C50 PE=1 SV=1 && -	NAC
123051267	7905.9	7050.64	5420.16	23145.8	23196.1	18920.5	6792.23	21754.1	-1.67934	3.15e-13	7.95e-11	LOC123051267	NC_057799.1	29874710	29876040	-	829	protein_coding	ribulose bisphosphate carboxylase small subunit%2C chloroplastic 2-like && sp|P26667|RBS2_WHEAT Ribulose bisphosphate carboxylase small subunit, chloroplastic 2 OS=Triticum aestivum OX=4565 GN=RBCS2 PE=3 SV=1 && PF12338:Ribulose-1,5-bisphosphate carboxylase small subunit|PF00101:Ribulose bisphosphate carboxylase, small chain	M-type_MADS
123081045	39.0702	106.559	95.8009	457.991	465.333	527.106	80.4766	483.477	-2.58363	3.26e-13	8.16e-11	LOC123081045	NC_057802.1	615991318	615992826	-	1509	transcribed_pseudogene	transcription factor MYB59-like && sp|Q4JL76|MYBA2_ORYSJ Myb-related protein MYBAS2 OS=Oryza sativa subsp. japonica OX=39947 GN=MYBAS2 PE=2 SV=1 && -	MYB
123051264	9482.44	8096.6	6385.08	26719.5	25566.5	22912.2	7988.04	25066.1	-1.64984	3.26e-13	8.16e-11	LOC123051264	NC_057799.1	29856489	29857692	-	921	protein_coding	ribulose bisphosphate carboxylase small subunit%2C chloroplastic 1-like && sp|P00871|RBS1_WHEAT Ribulose bisphosphate carboxylase small subunit, chloroplastic 1 OS=Triticum aestivum OX=4565 GN=RBCS1 PE=3 SV=2 && PF00101:Ribulose bisphosphate carboxylase, small chain|PF12338:Ribulose-1,5-bisphosphate carboxylase small subunit	M-type_MADS
123047176	480.458	291.635	679.495	87.1399	92.4701	79.7225	483.862	86.4441	2.48478	3.35e-13	8.36e-11	LOC123047176	NC_057794.1	302922877	302926028	-	1238	protein_coding	calcium uniporter protein 3%2C mitochondrial-like && sp|O64823|MCU2_ARATH Calcium uniporter protein 2, mitochondrial OS=Arabidopsis thaliana OX=3702 GN=At2g23790 PE=2 SV=1 && PF04678:Mitochondrial calcium uniporter	GRAS
123086677	26154.8	26167.7	21363.6	9202.37	8260.66	9343.47	24562	8935.5	1.4588	3.46e-13	8.62e-11	LOC123086677	NC_057803.1	519227276	519230578	+	1559	protein_coding	very-long-chain aldehyde decarbonylase GL1-10-like && sp|Q9AV39|GLO1A_ORYSJ Very-long-chain aldehyde decarbonylase GL1-10 OS=Oryza sativa subsp. japonica OX=39947 GN=GL1-10 PE=2 SV=1 && PF04116:Fatty acid hydroxylase superfamily	-
123156668	115.099	127.123	126.418	528.919	410.647	395.799	122.88	445.121	-1.85623	3.5e-13	8.68e-11	LOC123156668	NC_057813.1	517846009	517848043	+	1205	protein_coding	phosphatidylcholine_diacylglycerol cholinephosphotransferase 1-like && sp|Q9LVZ7|PDCT1_ARATH Phosphatidylcholine:diacylglycerol cholinephosphotransferase 1 OS=Arabidopsis thaliana OX=3702 GN=ROD1 PE=1 SV=1 && PF14360:PAP2 superfamily C-terminal	-
123078846	557.542	320.611	348.636	94.2326	54.6866	77.8466	408.93	75.5886	2.43526	3.51e-13	8.68e-11	LOC123078846	NC_057802.1	354163659	354166151	+	1122	protein_coding	probable cytokinin riboside 5'-monophosphate phosphoribohydrolase LOGL1 && sp|Q8LR50|LOGL1_ORYSJ Probable cytokinin riboside 5'-monophosphate phosphoribohydrolase LOGL1 OS=Oryza sativa subsp. japonica OX=39947 GN=LOGL1 PE=2 SV=1 && PF03641:Possible lysine decarboxylase	WRKY
543221	252.372	139.274	602.459	20.2651	15.9088	36.5785	331.369	24.2508	3.76924	3.59e-13	8.85e-11	LOC543221	NC_057797.1	729871860	729876088	+	1402	protein_coding	abscisic acid-inducible protein kinase-like%2C transcript variant X1 && sp|Q02066|AAIP_WHEAT Abscisic acid-inducible protein kinase (Fragment) OS=Triticum aestivum OX=4565 PE=2 SV=1 && PF00069:Protein kinase domain	LBD
123078872	480.458	593.551	533.325	1495.56	1547.13	1476.27	535.778	1506.32	-1.49095	4.25e-13	1.04e-10	LOC123078872	NC_057802.1	357246753	357254865	-	3134	protein_coding	chloride channel protein CLC-e-like%2C transcript variant X1 && sp|Q8GX93|CLCE_ARATH Chloride channel protein CLC-e OS=Arabidopsis thaliana OX=3702 GN=CLC-E PE=2 SV=2 && PF00654:Voltage gated chloride channel	-
123146261	1644.12	1683.44	1770.84	616.059	578.684	676.234	1699.46	623.659	1.44614	4.34e-13	1.06e-10	LOC123146261	NC_057811.1	486488693	486490111	-	1189	protein_coding	aquaporin PIP1-5-like && sp|Q9AR14|PIP15_MAIZE Aquaporin PIP1-5 OS=Zea mays OX=4577 GN=PIP1-5 PE=2 SV=1 && PF00230:Major intrinsic protein	C3H
123070169	475.178	415.953	2194.53	4.05302	11.9316	15.0066	1028.55	10.3304	6.63494	4.73e-13	1.15e-10	LOC123070169	NC_057801.1	424000711	424006768	-	3727	protein_coding	S-type anion channel SLAH2-like%2C transcript variant X4 && sp|Q9FLV9|SLAH3_ARATH S-type anion channel SLAH3 OS=Arabidopsis thaliana OX=3702 GN=SLAH3 PE=1 SV=1 && PF03595:Voltage-dependent anion channel	GRF
123064864	373.807	319.676	681.47	31.4109	66.6183	81.5983	458.318	59.8758	2.93439	5.03e-13	1.22e-10	LOC123064864	NC_057794.1	542091411	542094198	-	1458	protein_coding	protein phosphatase 2C 50-like && sp|Q6L5H6|P2C50_ORYSJ Protein phosphatase 2C 50 OS=Oryza sativa subsp. japonica OX=39947 GN=PP2C50 PE=1 SV=1 && PF00481:Protein phosphatase 2C	HB-other
123087073	1313.6	639.353	1082.45	210.757	106.39	205.403	1011.8	174.183	2.53784	5.33e-13	1.29e-10	LOC123087073	NC_057803.1	574664719	574668098	-	2185	protein_coding	monoacylglycerol lipase-like && sp|Q55EQ3|Y9086_DICDI Uncharacterized abhydrolase domain-containing protein DDB_G0269086 OS=Dictyostelium discoideum OX=44689 GN=DDB_G0269086 PE=1 SV=2 && PF12146:Serine aminopeptidase, S33	G2-like
123086458	648.354	643.091	735.79	213.797	235.65	226.975	675.745	225.474	1.58345	5.46e-13	1.32e-10	LOC123086458	NC_057803.1	475010670	475015344	+	2318	protein_coding	vacuolar-sorting receptor 1-like && sp|P93484|VSR1_PEA Vacuolar-sorting receptor 1 OS=Pisum sativum OX=3888 GN=BP80 PE=1 SV=1 && PF02225:PA domain	WRKY
100873101	499.465	501.013	536.288	170.227	158.094	172.576	512.255	166.965	1.61721	6.28e-13	1.51e-10	LOC100873101	NC_057808.1	258783451	258785079	-	1629	protein_coding	transcription factor MYB44 && sp|Q9FDW1|MYB44_ARATH Transcription factor MYB44 OS=Arabidopsis thaliana OX=3702 GN=MYB44 PE=1 SV=1 && PF13921:Myb-like DNA-binding domain	MYB
123110445	1476.22	1844.21	1244.42	6175.78	5528.32	4248.74	1521.62	5317.61	-1.80505	6.4e-13	1.54e-10	LOC123110445	NC_057807.1	66259130	66263716	+	1254	protein_coding	light-inducible protein CPRF2-like && sp|Q99090|CPRF2_PETCR Light-inducible protein CPRF2 OS=Petroselinum crispum OX=4043 GN=CPRF2 PE=2 SV=2 && PF12498:Basic leucine-zipper C terminal|PF00170:bZIP transcription factor	bZIP
123095624	739.166	497.274	1261.21	73.9676	56.6752	161.321	832.551	97.3212	3.09516	6.52e-13	1.56e-10	LOC123095624	NC_057805.1	6662976	6665441	-	839	protein_coding	glutathione transferase FosA-like && - && PF18029:Glyoxalase-like domain	-
123083062	6.33571	3.7389	2.96291	80.0471	168.037	57.2126	4.34584	101.766	-4.55952	6.61e-13	1.58e-10	LOC123083062	NC_057803.1	676047205	676048988	+	1453	protein_coding	GDSL esterase/lipase APG-like && sp|Q9LU14|APG2_ARATH GDSL esterase/lipase APG OS=Arabidopsis thaliana OX=3702 GN=APG PE=2 SV=1 && PF00657:GDSL-like Lipase/Acylhydrolase	ERF
123076848	162.616	214.052	265.675	1197.67	1107.65	665.917	214.114	990.412	-2.20896	6.84e-13	1.62e-10	LOC123076848	NC_057802.1	9262750	9264369	+	1517	protein_coding	WAT1-related protein At3g18200-like && sp|Q9LV20|WTR17_ARATH WAT1-related protein At3g18200 OS=Arabidopsis thaliana OX=3702 GN=At3g18200 PE=2 SV=1 && PF00892:EamA-like transporter family	ERF
123099237	194.295	84.1253	529.374	20.2651	3.97721	8.4412	269.265	10.8945	4.63097	6.85e-13	1.62e-10	LOC123099237	NC_057805.1	515013082	515015311	-	1275	protein_coding	cold-regulated protein 27-like%2C transcript variant X1 && - && -	-
123157708	227.029	250.507	200.491	702.185	800.413	649.973	226.009	717.524	-1.66627	7.06e-13	1.67e-10	LOC123157708	NC_057813.1	251493938	251496186	-	2109	protein_coding	cytochrome P450 78A9-like && sp|Q9SLP1|C78A9_ARATH Cytochrome P450 78A9 OS=Arabidopsis thaliana OX=3702 GN=CYP78A9 PE=1 SV=1 && PF00067:Cytochrome P450	bHLH
123160937	219.638	147.687	173.824	613.019	610.502	626.525	180.383	616.682	-1.7749	7.27e-13	1.71e-10	LOC123160937	NC_057813.1	720938317	720939199	-	727	protein_coding	synapsin-1-like && - && -	-
123166195	89.7558	57.0183	82.9616	280.671	369.88	340.462	76.5786	330.338	-2.11141	7.51e-13	1.76e-10	LOC123166195	NC_057814.1	67326985	67328889	-	1457	protein_coding	GDSL esterase/lipase At5g45910-like && sp|Q9FJ45|GDL83_ARATH GDSL esterase/lipase At5g45910 OS=Arabidopsis thaliana OX=3702 GN=At5g45910 PE=2 SV=1 && PF00657:GDSL-like Lipase/Acylhydrolase	B3
123106062	7609.18	6059.83	3926.85	1471.25	1314.47	779.404	5865.29	1188.37	2.30332	7.7e-13	1.8e-10	LOC123106062	NC_057806.1	692696894	692702451	+	1189	protein_coding	transcription factor bHLH167-like && sp|F4I4E1|BH167_ARATH Transcription factor bHLH167 OS=Arabidopsis thaliana OX=3702 GN=BHLH167 PE=2 SV=1 && -	bHLH
123044576	115.099	135.535	46.419	4.05302	3.97721	0	99.0176	2.67674	5.23113	7.78e-13	1.82e-10	LOC123044576	NC_057798.1	244431211	244437309	-	3142	protein_coding	probable mixed-linked glucan synthase 8 && sp|Q84S18|CSLF8_ORYSJ Probable mixed-linked glucan synthase 8 OS=Oryza sativa subsp. japonica OX=39947 GN=CSFL8 PE=2 SV=1 && PF03552:Cellulose synthase	G2-like
123138338	22.175	9.34726	10.864	177.319	167.043	89.1016	14.1288	144.488	-3.36373	7.83e-13	1.82e-10	LOC123138338	NC_057810.1	621125209	621127226	-	1916	protein_coding	7-deoxyloganetin glucosyltransferase-like && sp|F8WKW1|UGT2_GARJA 7-deoxyloganetin glucosyltransferase OS=Gardenia jasminoides OX=114476 GN=UGT85A24 PE=1 SV=1 && PF00201:UDP-glucoronosyl and UDP-glucosyl transferase	GRAS
778385	194.295	145.817	75.0605	1.01325	6.96012	13.1308	138.391	7.03471	4.28404	8.16e-13	1.89e-10	LOC778385	NC_057803.1	608706523	608710415	-	2432	protein_coding	beta-fructofuranosidase%2C insoluble isoenzyme 4%2C transcript variant X1 && sp|Q5JJV0|INV4_ORYSJ Beta-fructofuranosidase, insoluble isoenzyme 4 OS=Oryza sativa subsp. japonica OX=39947 GN=CIN4 PE=2 SV=1 && PF00251:Glycosyl hydrolases family 32 N-terminal domain|PF08244:Glycosyl hydrolases family 32 C terminal	-
123080442	235.477	126.188	185.676	24.3181	20.8803	34.7027	182.447	26.6337	2.77238	8.43e-13	1.95e-10	LOC123080442	NC_057802.1	554536860	554538776	-	1495	protein_coding	heavy metal-associated isoprenylated plant protein 35-like && sp|Q84J88|HIP36_ARATH Heavy metal-associated isoprenylated plant protein 36 OS=Arabidopsis thaliana OX=3702 GN=HIPP36 PE=1 SV=1 && PF00403:Heavy-metal-associated domain	-
123093841	387.534	331.828	551.102	108.418	100.425	83.4741	423.488	97.4389	2.12039	8.68e-13	2e-10	LOC123093841	NC_057804.1	646730264	646734741	-	3005	protein_coding	uncharacterized LOC123093841%2C transcript variant X2 && - && PF00561:alpha/beta hydrolase fold	GRAS
123092301	161.56	42.9974	337.772	3.03976	8.94872	6.56538	180.777	6.18462	4.86658	8.7e-13	2e-10	LOC123092301	NC_057795.1	436896155	436897374	+	1220	protein_coding	RING-H2 finger protein ATL2-like && sp|Q940Q4|ATL13_ARATH RING-H2 finger protein ATL13 OS=Arabidopsis thaliana OX=3702 GN=ATL13 PE=2 SV=2 && PF13639:Ring finger domain	WOX
123065334	795.131	427.17	3999.93	0	0.994302	0	1740.75	0.331434	12.2736	8.81e-13	2.02e-10	LOC123065334	NC_057801.1	264318616	264321279	+	2095	protein_coding	tonoplast dicarboxylate transporter-like && sp|Q8LG88|TDT_ARATH Tonoplast dicarboxylate transporter OS=Arabidopsis thaliana OX=3702 GN=TDT PE=2 SV=2 && PF00939:Sodium:sulfate symporter transmembrane region	-
123041749	8.44761	13.0862	9.87638	114.498	125.282	73.1571	10.4701	104.312	-3.30969	9.52e-13	2.18e-10	LOC123041749	NC_057798.1	599876828	599879844	+	2516	protein_coding	ferric reduction oxidase 2-like%2C transcript variant X1 && sp|P92949|FRO2_ARATH Ferric reduction oxidase 2 OS=Arabidopsis thaliana OX=3702 GN=FRO2 PE=1 SV=2 && PF01794:Ferric reductase like transmembrane component|PF08022:FAD-binding domain|PF08030:Ferric reductase NAD binding domain	NAC
123177067	417.101	152.36	74.0729	12.1591	14.9145	7.50329	214.511	11.5256	4.22028	9.54e-13	2.18e-10	LOC123177067	NW_025244954.1	4	1926	+	1267	protein_coding	GDSL esterase/lipase At4g28780-like && sp|Q9SVU5|GDL67_ARATH GDSL esterase/lipase At4g28780 OS=Arabidopsis thaliana OX=3702 GN=At4g28780 PE=2 SV=1 && PF00657:GDSL-like Lipase/Acylhydrolase	ERF
100125736	215.414	52.3447	430.61	6.07953	13.9202	10.317	232.79	10.1056	4.52427	1.01e-12	2.29e-10	LOC100125736	NC_057814.1	538284604	538287075	+	1411	protein_coding	probable protein phosphatase 2C 59 && sp|Q5Z6F5|P2C59_ORYSJ Probable protein phosphatase 2C 59 OS=Oryza sativa subsp. japonica OX=39947 GN=Os06g0698300 PE=2 SV=1 && PF00481:Protein phosphatase 2C	HB-other
123044360	173.176	52.3447	110.615	0	0	3.75165	112.045	1.25055	6.4333	1.05e-12	2.39e-10	LOC123044360	NC_057798.1	204641522	204642752	-	1113	protein_coding	LOB domain-containing protein 37-like && sp|Q9FN11|LBD37_ARATH LOB domain-containing protein 37 OS=Arabidopsis thaliana OX=3702 GN=LBD37 PE=2 SV=1 && PF03195:Lateral organ boundaries (LOB) domain	LBD
novel.700	39.0702	39.2585	47.4066	226.969	220.735	161.321	41.9118	203.008	-2.27544	1.06e-12	2.4e-10	-	NC_057797.1	784850355	784855488	-	4955	-	- && sp|Q9ZT94|POLR2_ARATH Retrovirus-related Pol polyprotein from transposon RE2 OS=Arabidopsis thaliana OX=3702 GN=RE2 PE=4 SV=1 && -	LBD
123139405	59.1333	61.6919	263.699	0	0	0	128.175	0	9.47201	1.08e-12	2.44e-10	LOC123139405	NC_057794.1	406736676	406737739	-	1064	protein_coding	E3 ubiquitin-protein ligase EL5-like && sp|Q9XF63|ATL3_ARATH RING-H2 finger protein ATL3 OS=Arabidopsis thaliana OX=3702 GN=ATL3 PE=2 SV=1 && PF13639:Ring finger domain	WOX
123119218	21517.1	20617.3	16794.8	7247.81	7586.53	6790.48	19643.1	7208.27	1.4463	1.15e-12	2.58e-10	LOC123119218	NC_057808.1	28984970	28990729	-	3029	protein_coding	5-methyltetrahydropteroyltriglutamate--homocysteine methyltransferase 1-like%2C transcript variant X2 && sp|Q2QLY5|METE1_ORYSJ 5-methyltetrahydropteroyltriglutamate--homocysteine methyltransferase 1 OS=Oryza sativa subsp. japonica OX=39947 GN=Os12g0623900 PE=2 SV=1 && PF08267:Cobalamin-independent synthase, N-terminal domain|PF01717:Cobalamin-independent synthase, Catalytic domain	-
123052230	140.441	64.4961	127.405	8.10603	11.9316	9.37911	110.781	9.80559	3.49644	1.22e-12	2.73e-10	LOC123052230	NC_057799.1	139910534	139912520	+	974	protein_coding	classical arabinogalactan protein 9-like && - && -	-
123121546	460.395	88.799	411.845	20.2651	6.96012	28.1373	320.346	18.4542	4.11443	1.31e-12	2.93e-10	LOC123121546	NC_057808.1	331597965	331599795	+	1428	protein_coding	protein TIFY 10c-like && sp|A2Z1N3|TI10C_ORYSI Protein TIFY 10c OS=Oryza sativa subsp. indica OX=39946 GN=TIFY10C PE=3 SV=1 && PF06200:tify domain|PF09425:Divergent CCT motif	-
123055288	83.4201	93.4726	94.8133	393.143	359.937	280.436	90.5687	344.505	-1.92642	1.39e-12	3.09e-10	LOC123055288	NC_057794.1	447927317	447936549	-	3402	protein_coding	pyrimidine-specific ribonucleoside hydrolase RihA-like%2C transcript variant X3 && - && PF01156:Inosine-uridine preferring nucleoside hydrolase	-
123041880	278.771	187.88	344.686	23.3048	42.755	55.3368	270.446	40.4655	2.73734	1.42e-12	3.14e-10	LOC123041880	NC_057794.1	152071470	152072691	+	1222	protein_coding	NDR1/HIN1-like protein 13 && - && PF03168:Late embryogenesis abundant protein	G2-like
123074874	112.987	284.157	337.772	33.4374	27.8405	27.1994	244.972	29.4924	3.0557	1.42e-12	3.14e-10	LOC123074874	NC_057802.1	436568715	436572107	+	2051	protein_coding	serine carboxypeptidase-like 18 && sp|Q9C7Z9|SCP18_ARATH Serine carboxypeptidase-like 18 OS=Arabidopsis thaliana OX=3702 GN=SCPL18 PE=2 SV=2 && PF00450:Serine carboxypeptidase	C3H
123092545	317.841	249.572	619.249	65.8615	58.6638	65.6538	395.554	63.3931	2.64131	1.43e-12	3.16e-10	LOC123092545	NC_057804.1	430806499	430809519	-	3021	protein_coding	receptor-like protein kinase HERK 1 && sp|Q9LX66|HERK_ARATH Receptor-like protein kinase HERK 1 OS=Arabidopsis thaliana OX=3702 GN=HERK1 PE=1 SV=1 && PF12819:Malectin-like domain|PF07714:Protein tyrosine kinase	GRAS
123143907	8954.46	4942.83	1174.3	88.1531	39.7721	18.7582	5023.87	48.8945	6.68372	1.44e-12	3.18e-10	LOC123143907	NC_057811.1	108150035	108154330	+	2963	transcribed_pseudogene	putative linoleate 9S-lipoxygenase 3 && sp|Q7G794|LOX3_ORYSJ Putative linoleate 9S-lipoxygenase 3 OS=Oryza sativa subsp. japonica OX=39947 GN=Os03g0700400 PE=3 SV=1 && -	NF-YA
123110224	1165.77	725.347	691.347	230.009	208.803	222.285	860.821	220.366	1.96549	1.55e-12	3.4e-10	LOC123110224	NC_057807.1	27660517	27662577	-	1114	protein_coding	noroxomaritidine/norcraugsodine reductase-like && sp|A0A1C9II22|NR_NARAP Noroxomaritidine/norcraugsodine reductase OS=Narcissus aff. pseudonarcissus MK-2014 OX=1540222 GN=NR PE=1 SV=1 && PF13561:Enoyl-(Acyl carrier protein) reductase	C2H2
123063737	114.043	123.384	300.242	919.022	1075.84	1597.26	179.223	1197.37	-2.73994	1.57e-12	3.43e-10	LOC123063737	NC_057800.1	748817016	748818501	-	1331	protein_coding	transcription factor MYB59-like && sp|Q4JL76|MYBA2_ORYSJ Myb-related protein MYBAS2 OS=Oryza sativa subsp. japonica OX=39947 GN=MYBAS2 PE=2 SV=1 && PF00249:Myb-like DNA-binding domain	MYB
123052082	165.784	174.794	159.01	23.3048	13.9202	36.5785	166.529	24.6012	2.75464	1.58e-12	3.44e-10	LOC123052082	NC_057799.1	121414263	121420724	-	2999	protein_coding	sucrose synthase 2-like && sp|P31923|SUS2_HORVU Sucrose synthase 2 OS=Hordeum vulgare OX=4513 GN=SS2 PE=1 SV=1 && PF00534:Glycosyl transferases group 1|PF00862:Sucrose synthase	HB-other
100415822	404.429	200.966	766.407	42.5567	47.7265	65.6538	457.268	51.979	3.13574	1.62e-12	3.53e-10	LOC100415822	NC_057803.1	648361725	648365012	-	1268	protein_coding	hypersensitive-induced response protein 4 && sp|Q9FHM7|HIR4_ARATH Hypersensitive-induced response protein 4 OS=Arabidopsis thaliana OX=3702 GN=HIR4 PE=1 SV=1 && PF01145:SPFH domain / Band 7 family	-
123088588	437.164	499.144	140.245	51.676	31.8177	24.3857	358.851	35.9598	3.32104	1.65e-12	3.57e-10	LOC123088588	NC_057803.1	748237547	748241237	+	2301	protein_coding	sucrose_sucrose 1-fructosyltransferase-like && sp|Q9FSV7|SST_FESAR Sucrose:sucrose 1-fructosyltransferase OS=Festuca arundinacea OX=4606 GN=1-SST PE=1 SV=1 && PF08244:Glycosyl hydrolases family 32 C terminal|PF11837:Domain of unknown function (DUF3357)|PF00251:Glycosyl hydrolases family 32 N-terminal domain	-
123085396	176.344	66.3655	262.712	12.1591	15.9088	10.317	168.474	12.795	3.71988	1.66e-12	3.6e-10	LOC123085396	NC_057803.1	100541779	100546441	-	1795	protein_coding	uncharacterized WD repeat-containing protein C2A9.03-like%2C transcript variant X1 && sp|Q9Y7K5|YGI3_SCHPO Uncharacterized WD repeat-containing protein C2A9.03 OS=Schizosaccharomyces pombe (strain 972 / ATCC 24843) OX=284812 GN=SPBC2A9.03 PE=4 SV=2 && PF00400:WD domain, G-beta repeat	C3H
123114125	124.602	213.118	165.923	590.727	660.217	629.339	167.881	626.761	-1.89882	1.67e-12	3.61e-10	LOC123114125	NC_057795.1	170231894	170246077	+	2267	lncRNA	uncharacterized LOC123114125%2C transcript variant X2 && - && -	NF-YB
123071396	842.649	553.358	582.707	104.365	169.031	176.327	659.571	149.908	2.1364	1.77e-12	3.82e-10	LOC123071396	NC_057801.1	636877260	636879451	+	1926	protein_coding	probable protein phosphatase 2C 9 && sp|Q5N9N2|P2C09_ORYSJ Probable protein phosphatase 2C 9 OS=Oryza sativa subsp. japonica OX=39947 GN=Os01g0846300 PE=2 SV=1 && PF00481:Protein phosphatase 2C	NAC
123052021	875.383	419.692	411.845	108.418	107.385	104.108	568.973	106.637	2.41521	1.9e-12	4.08e-10	LOC123052021	NC_057799.1	114880656	114885017	-	1241	protein_coding	UMP-CMP kinase 3%2C transcript variant X1 && sp|Q6K7H2|KCY4_ORYSJ UMP-CMP kinase 4 OS=Oryza sativa subsp. japonica OX=39947 GN=Os02g0778400 PE=2 SV=1 && PF00406:Adenylate kinase	-
123052098	2562.79	2042.38	2919.46	741.702	710.926	916.339	2508.21	789.656	1.66716	2.15e-12	4.6e-10	LOC123052098	NC_057799.1	122599728	122601962	-	1286	protein_coding	protein TIFY 10b-like && sp|Q8H395|TI10B_ORYSJ Protein TIFY 10b OS=Oryza sativa subsp. japonica OX=39947 GN=TIFY10B PE=1 SV=1 && PF06200:tify domain|PF09425:Divergent CCT motif	-
123120481	1274.53	853.405	2335.76	215.823	168.037	316.076	1487.9	233.312	2.67249	2.17e-12	4.63e-10	LOC123120481	NC_057808.1	247044066	247047631	-	2418	protein_coding	F-box/LRR-repeat protein 3-like && sp|Q8RWU5|FBL3_ARATH F-box/LRR-repeat protein 3 OS=Arabidopsis thaliana OX=3702 GN=FBL3 PE=2 SV=1 && -	WRKY
606368	2883.8	2042.38	3903.15	716.371	862.06	637.78	2943.11	738.737	1.99424	2.22e-12	4.73e-10	LOC606368	NC_057794.1	481434076	481446869	-	2620	protein_coding	delta-1-pyrroline-5-carboxylate synthase 1 && sp|O04226|P5CS1_ORYSJ Delta-1-pyrroline-5-carboxylate synthase 1 OS=Oryza sativa subsp. japonica OX=39947 GN=P5CS1 PE=2 SV=2 && PF00171:Aldehyde dehydrogenase family|PF00696:Amino acid kinase family	B3
123143035	14.7833	10.282	11.8517	107.405	128.265	78.7846	12.3057	104.818	-3.09484	2.32e-12	4.93e-10	LOC123143035	NC_057795.1	621588835	621591558	+	1710	protein_coding	probable polygalacturonase At1g80170 && sp|Q94AJ5|PGLR5_ARATH Probable polygalacturonase At1g80170 OS=Arabidopsis thaliana OX=3702 GN=At1g80170 PE=1 SV=1 && PF00295:Glycosyl hydrolases family 28	NAC
542812	344.24	300.982	306.168	849.107	868.026	969.8	317.13	895.644	-1.49833	2.43e-12	5.14e-10	LOC542812	NC_057808.1	413663113	413664399	-	1085	protein_coding	dehydration-responsive element-binding protein 1B && sp|Q8GUW4|DRE1B_ORYSI Dehydration-responsive element-binding protein 1B OS=Oryza sativa subsp. indica OX=39946 GN=DREB1B PE=2 SV=1 && PF00847:AP2 domain	ERF
123044677	186.903	260.789	211.355	53.7025	47.7265	50.6472	219.682	50.6921	2.11649	2.44e-12	5.15e-10	LOC123044677	NC_057798.1	262173349	262176598	-	2145	protein_coding	protein DETOXIFICATION 40-like && sp|Q9LVD9|DTX40_ARATH Protein DETOXIFICATION 40 OS=Arabidopsis thaliana OX=3702 GN=DTX40 PE=1 SV=1 && PF01554:MatE	MYB_related
123190328	2848.96	1767.57	1904.17	607.953	622.433	672.482	2173.56	634.289	1.77663	2.49e-12	5.24e-10	LOC123190328	NC_057797.1	696830392	696832738	+	773	protein_coding	late embryogenesis abundant protein At5g17165-like && sp|F4KFM8|LEA65_ARATH Late embryogenesis abundant protein At5g17165 OS=Arabidopsis thaliana OX=3702 GN=At5g17165 PE=3 SV=1 && -	-
123150847	1.05595	5.60836	4.93819	67.888	174.003	61.9022	3.8675	101.264	-4.69032	2.51e-12	5.27e-10	LOC123150847	NC_057812.1	65067056	65068721	+	1340	protein_coding	GDSL esterase/lipase APG-like && sp|Q9LU14|APG2_ARATH GDSL esterase/lipase APG OS=Arabidopsis thaliana OX=3702 GN=APG PE=2 SV=1 && PF00657:GDSL-like Lipase/Acylhydrolase	ERF
123092582	340.016	165.446	682.458	20.2651	42.755	46.8956	395.974	36.6386	3.43209	2.54e-12	5.32e-10	LOC123092582	NC_057804.1	436910769	436913264	+	2362	protein_coding	heat shock cognate 70 kDa protein-like && sp|P09189|HSP7C_PETHY Heat shock cognate 70 kDa protein OS=Petunia hybrida OX=4102 GN=HSP70 PE=2 SV=1 && PF00012:Hsp70 protein	GATA
123079150	80.2523	33.6501	45.4314	341.467	262.496	289.815	53.1113	297.926	-2.49275	2.62e-12	5.47e-10	LOC123079150	NC_057802.1	396871777	396873711	-	1935	protein_coding	disease resistance protein RGA2-like && - && PF00931:NB-ARC domain|PF18052:Rx N-terminal domain	GRAS
123169574	418.157	200.966	64.1965	19.2518	7.95442	8.4412	227.773	11.8825	4.26382	2.63e-12	5.47e-10	LOC123169574	NC_057814.1	4879575	4883156	-	2289	protein_coding	sucrose_sucrose 1-fructosyltransferase-like && sp|Q9FSV7|SST_FESAR Sucrose:sucrose 1-fructosyltransferase OS=Festuca arundinacea OX=4606 GN=1-SST PE=1 SV=1 && PF08244:Glycosyl hydrolases family 32 C terminal|PF00251:Glycosyl hydrolases family 32 N-terminal domain	-
123162779	1125.64	606.637	1520.96	183.399	158.094	251.36	1084.41	197.618	2.45555	2.94e-12	6.11e-10	LOC123162779	NC_057813.1	149920978	149926743	-	2185	protein_coding	zinc finger protein CONSTANS-LIKE 9-like%2C transcript variant X1 && sp|Q9SSE5|COL9_ARATH Zinc finger protein CONSTANS-LIKE 9 OS=Arabidopsis thaliana OX=3702 GN=COL9 PE=1 SV=1 && PF00643:B-box zinc finger	CO-like
542857	3747.57	2569.56	2746.62	940.3	924.701	1061.72	3021.25	975.572	1.63066	3.05e-12	6.32e-10	LOC542857	NC_057804.1	110736868	110740543	-	1888	protein_coding	protein disulfide-isomerase-like && sp|P52589|PDI_WHEAT Protein disulfide-isomerase OS=Triticum aestivum OX=4565 GN=PDI PE=2 SV=1 && PF00085:Thioredoxin|PF13848:Thioredoxin-like domain	MYB_related
123161773	544.871	234.616	97.7762	10.1325	28.8348	17.8203	292.421	18.9292	3.94827	3.3e-12	6.82e-10	LOC123161773	NC_057813.1	735156067	735158166	-	1444	protein_coding	GDSL esterase/lipase At5g55050-like && sp|Q9M8Y5|LTL1_ARATH GDSL esterase/lipase LTL1 OS=Arabidopsis thaliana OX=3702 GN=LTL1 PE=2 SV=1 && PF00657:GDSL-like Lipase/Acylhydrolase	ERF
123099951	95.0356	54.2141	489.869	7.09278	3.97721	8.4412	213.039	6.50373	5.03118	3.34e-12	6.87e-10	LOC123099951	NC_057805.1	314869193	314870833	-	1365	protein_coding	galactinol synthase 2-like && sp|C7G304|GOLS2_SOLLC Galactinol synthase 2 OS=Solanum lycopersicum OX=4081 GN=GOLS2 PE=2 SV=1 && PF01501:Glycosyl transferase family 8	-
123113276	2130.91	2381.68	2191.57	903.823	664.194	785.97	2234.72	784.662	1.51004	3.4e-12	6.99e-10	LOC123113276	NC_057807.1	569733132	569736581	-	1821	protein_coding	ATP sulfurylase 4%2C chloroplastic-like && sp|Q9S7D8|APS4_ARATH ATP sulfurylase 4, chloroplastic OS=Arabidopsis thaliana OX=3702 GN=APS4 PE=2 SV=1 && PF01747:ATP-sulfurylase|PF14306:PUA-like domain	-
123086818	208.022	730.021	566.904	58.7687	78.5499	35.6406	501.649	57.6531	3.12286	3.42e-12	7.01e-10	LOC123086818	NC_057803.1	542322328	542323913	+	1483	protein_coding	jasmonate-induced oxygenase 2-like && sp|Q9FFF6|JOX2_ARATH Jasmonate-induced oxygenase 2 OS=Arabidopsis thaliana OX=3702 GN=JOX2 PE=1 SV=1 && PF14226:non-haem dioxygenase in morphine synthesis N-terminal|PF03171:2OG-Fe(II) oxygenase superfamily	Dof
123112412	158.393	98.1462	205.429	847.08	1001.26	539.299	153.989	795.881	-2.37034	3.84e-12	7.83e-10	LOC123112412	NC_057807.1	452847696	452851654	-	1914	protein_coding	beta-glucosidase 30-like && sp|Q0J0N4|BGL30_ORYSJ Beta-glucosidase 30 OS=Oryza sativa subsp. japonica OX=39947 GN=BGLU30 PE=2 SV=1 && PF00232:Glycosyl hydrolase family 1	EIL
123167340	309.394	230.877	375.303	77.0073	60.6524	74.095	305.191	70.5849	2.11182	3.89e-12	7.92e-10	LOC123167340	NC_057814.1	421821625	421825272	+	1746	protein_coding	probable cinnamyl alcohol dehydrogenase 5%2C transcript variant X1 && sp|Q0J6T3|CADH5_ORYSJ Probable cinnamyl alcohol dehydrogenase 5 OS=Oryza sativa subsp. japonica OX=39947 GN=CAD5 PE=3 SV=2 && PF00107:Zinc-binding dehydrogenase|PF08240:Alcohol dehydrogenase GroES-like domain	HB-other
123110850	1600.82	1355.35	1235.54	358.692	519.026	433.315	1397.24	437.011	1.67666	4.25e-12	8.63e-10	LOC123110850	NC_057795.1	111521156	111525682	-	1757	protein_coding	CBL-interacting protein kinase 17-like && sp|Q75L42|CIPKH_ORYSJ CBL-interacting protein kinase 17 OS=Oryza sativa subsp. japonica OX=39947 GN=CIPK17 PE=2 SV=1 && PF03822:NAF domain|PF00069:Protein kinase domain	bHLH
123141207	140.441	84.1253	83.9492	6.07953	8.94872	14.0687	102.839	9.69897	3.39779	4.34e-12	8.79e-10	LOC123141207	NC_057795.1	596898294	596900056	-	1763	protein_coding	anthocyanidin 5%2C3-O-glucosyltransferase-like && sp|Q4R1I9|ANGLT_ROSHC Anthocyanidin 5,3-O-glucosyltransferase OS=Rosa hybrid cultivar OX=128735 GN=RhGT1 PE=2 SV=1 && PF00201:UDP-glucoronosyl and UDP-glucosyl transferase	bHLH
123163020	1181.61	699.175	906.652	281.685	216.758	254.174	929.145	250.872	1.88869	4.43e-12	8.93e-10	LOC123163020	NC_057813.1	158892178	158895041	-	1455	protein_coding	anthranilate O-methyltransferase 2-like && sp|B6SU46|AAMT2_MAIZE Anthranilate O-methyltransferase 2 OS=Zea mays OX=4577 GN=AAMT2 PE=1 SV=1 && PF03492:SAM dependent carboxyl methyltransferase	MYB_related
123100016	680.032	1058.11	807.888	2541.24	2589.16	3080.1	848.677	2736.84	-1.68891	4.43e-12	8.93e-10	LOC123100016	NC_057805.1	350883459	350884439	-	717	protein_coding	uncharacterized LOC123100016 && - && PF09713:Plant protein 1589 of unknown function (A_thal_3526)	-
123093875	1381.18	486.058	243.947	73.9676	58.6638	26.2615	703.729	52.9643	3.73314	4.9e-12	9.85e-10	LOC123093875	NC_057804.1	651745489	651748063	+	1022	protein_coding	stem 28 kDa glycoprotein-like && sp|P15490|VSPA_SOYBN Stem 28 kDa glycoprotein OS=Glycine max OX=3847 GN=VSPA PE=2 SV=1 && PF03767:HAD superfamily, subfamily IIIB (Acid phosphatase)	MYB
123184888	707.487	387.911	522.461	148.948	86.5043	106.922	539.286	114.125	2.24049	4.91e-12	9.85e-10	LOC123184888	NC_057797.1	93024172	93025561	+	1390	protein_coding	probable carboxylesterase 18 && sp|Q940G6|GID1C_ARATH Gibberellin receptor GID1C OS=Arabidopsis thaliana OX=3702 GN=GID1C PE=1 SV=1 && PF07859:alpha/beta hydrolase fold	MYB_related
123072843	369.583	427.17	975.787	71.941	109.373	92.8532	590.846	91.3892	2.69254	5.45e-12	1.09e-09	LOC123072843	NC_057801.1	840968521	840974048	-	1934	protein_coding	vacuolar-processing enzyme gamma-isozyme-like && sp|Q39119|VPEG_ARATH Vacuolar-processing enzyme gamma-isozyme OS=Arabidopsis thaliana OX=3702 GN=At4g32940 PE=1 SV=2 && PF01650:Peptidase C13 family	-
123188911	204.854	200.031	184.688	1078.1	796.436	543.051	196.525	805.863	-2.03565	5.65e-12	1.13e-09	LOC123188911	NC_057797.1	434775810	434780315	+	1808	protein_coding	amino acid permease 6-like && sp|P92934|AAP6_ARATH Amino acid permease 6 OS=Arabidopsis thaliana OX=3702 GN=AAP6 PE=1 SV=1 && PF01490:Transmembrane amino acid transporter protein	MYB_related
123121084	5979.85	4369.84	3988.08	20007.7	16255.8	13120.4	4779.26	16461.3	-1.78426	5.69e-12	1.13e-09	LOC123121084	NC_057808.1	285107711	285120556	-	3148	protein_coding	bifunctional aspartokinase/homoserine dehydrogenase 2%2C chloroplastic-like%2C transcript variant X1 && sp|P49080|AKH2_MAIZE Bifunctional aspartokinase/homoserine dehydrogenase 2, chloroplastic OS=Zea mays OX=4577 GN=AKHSDH2 PE=2 SV=1 && PF00742:Homoserine dehydrogenase|PF01842:ACT domain|PF03447:Homoserine dehydrogenase, NAD binding domain|PF00696:Amino acid kinase family	bHLH
123080061	2575.46	1448.83	930.355	324.241	235.65	334.834	1651.55	298.242	2.46903	6.07e-12	1.21e-09	LOC123080061	NC_057802.1	508175199	508176861	-	1557	protein_coding	flavonoid O-methyltransferase-like protein Os11g0303600 && sp|Q53QK0|Y1103_ORYSJ Flavonoid O-methyltransferase-like protein Os11g0303600 OS=Oryza sativa subsp. japonica OX=39947 GN=Os11g0303600 PE=2 SV=1 && PF08100:Dimerisation domain|PF00891:O-methyltransferase domain	-
123104404	602.948	891.729	549.127	196.571	131.248	179.141	681.268	168.987	2.01158	6.34e-12	1.25e-09	LOC123104404	NC_057806.1	510665731	510667197	-	1467	protein_coding	mitochondrial uncoupling protein 5-like && sp|Q9SJY5|PUMP5_ARATH Mitochondrial uncoupling protein 5 OS=Arabidopsis thaliana OX=3702 GN=PUMP5 PE=2 SV=1 && PF00153:Mitochondrial carrier protein	ERF
123085462	52.7975	73.8434	87.8998	4.05302	2.98291	5.62747	71.5136	4.22113	4.0772	6.37e-12	1.26e-09	LOC123085462	NC_057803.1	110568207	110570701	-	2353	protein_coding	heat shock cognate 70 kDa protein-like && sp|P09189|HSP7C_PETHY Heat shock cognate 70 kDa protein OS=Petunia hybrida OX=4102 GN=HSP70 PE=2 SV=1 && PF00012:Hsp70 protein	GATA
123063255	271.379	242.094	328.884	59.782	31.8177	70.3434	280.786	53.981	2.37739	6.56e-12	1.29e-09	LOC123063255	NC_057800.1	690290917	690292831	-	1496	protein_coding	heavy metal-associated isoprenylated plant protein 35-like && sp|Q84J88|HIP36_ARATH Heavy metal-associated isoprenylated plant protein 36 OS=Arabidopsis thaliana OX=3702 GN=HIPP36 PE=1 SV=1 && PF00403:Heavy-metal-associated domain	-
123113816	652.578	329.024	471.103	2689.18	2198.4	1564.44	484.235	2150.67	-2.15151	6.92e-12	1.36e-09	LOC123113816	NC_057807.1	638562092	638563089	-	998	protein_coding	chlorophyll a-b binding protein of LHCII type 1-like && sp|P04784|CB21_WHEAT Chlorophyll a-b binding protein, chloroplastic OS=Triticum aestivum OX=4565 GN=WHAB1.6 PE=3 SV=1 && PF00504:Chlorophyll A-B binding protein	ERF
123040206	2.1119	13.0862	1.97528	87.1399	100.425	111.611	5.72445	99.7253	-4.09586	7.03e-12	1.38e-09	LOC123040206	NC_057798.1	34748740	34754943	+	2115	protein_coding	amino acid transporter AVT1C-like && sp|F4IUW3|AVT1C_ARATH Amino acid transporter AVT1C OS=Arabidopsis thaliana OX=3702 GN=AVT1C PE=1 SV=1 && PF01490:Transmembrane amino acid transporter protein	-
123122135	789.851	714.131	1073.56	286.751	226.701	243.857	859.182	252.436	1.76718	7.22e-12	1.41e-09	LOC123122135	NC_057808.1	401523542	401528598	-	1947	protein_coding	beta-glucosidase 31-like && sp|B7F7K7|BGL31_ORYSJ Beta-glucosidase 31 OS=Oryza sativa subsp. japonica OX=39947 GN=BGLU31 PE=2 SV=1 && PF00232:Glycosyl hydrolase family 1	NAC
123110517	267.156	84.1253	154.072	8.10603	15.9088	20.6341	168.451	14.883	3.49487	7.23e-12	1.41e-09	LOC123110517	NC_057807.1	80311049	80312196	-	952	protein_coding	HVA22-like protein e && sp|Q07764|HVA22_HORVU Protein HVA22 OS=Hordeum vulgare OX=4513 GN=HVA22 PE=2 SV=1 && PF03134:TB2/DP1, HVA22 family	GeBP
123113372	513.192	349.588	309.131	95.2459	99.4302	98.4807	390.637	97.7189	1.99847	7.62e-12	1.48e-09	LOC123113372	NC_057807.1	580683402	580685989	+	1999	protein_coding	UDP-glucose 6-dehydrogenase 4 && sp|Q2QS14|UGDH4_ORYSJ UDP-glucose 6-dehydrogenase 4 OS=Oryza sativa subsp. japonica OX=39947 GN=UGD4 PE=2 SV=1 && PF03720:UDP-glucose/GDP-mannose dehydrogenase family, UDP binding domain|PF03721:UDP-glucose/GDP-mannose dehydrogenase family, NAD binding domain|PF00984:UDP-glucose/GDP-mannose dehydrogenase family, central domain	MYB_related
123155757	491.017	297.243	716.038	61.8085	99.4302	102.232	501.433	87.8237	2.51237	8.02e-12	1.55e-09	LOC123155757	NC_057813.1	78505656	78515387	-	1755	protein_coding	choline/ethanolaminephosphotransferase 1-like%2C transcript variant X2 && sp|O82567|AAPT1_ARATH Choline/ethanolaminephosphotransferase 1 OS=Arabidopsis thaliana OX=3702 GN=AAPT1 PE=1 SV=1 && PF01066:CDP-alcohol phosphatidyltransferase	G2-like
123123326	2116.13	968.376	1084.43	6283.19	6022.49	5820.68	1389.64	6042.12	-2.12059	8.07e-12	1.56e-09	LOC123123326	NC_057808.1	511120432	511121497	-	1066	protein_coding	chlorophyll a-b binding protein of LHCII type 1-like && sp|P04784|CB21_WHEAT Chlorophyll a-b binding protein, chloroplastic OS=Triticum aestivum OX=4565 GN=WHAB1.6 PE=3 SV=1 && PF00504:Chlorophyll A-B binding protein	ERF
123188028	157.337	153.295	526.411	23.3048	24.8576	31.889	279.014	26.6838	3.38511	8.08e-12	1.56e-09	LOC123188028	NC_057797.1	141169435	141182031	-	1302	protein_coding	putative anthocyanidin reductase && sp|Q5XLY0|ANR_GINBI Putative anthocyanidin reductase OS=Ginkgo biloba OX=3311 PE=2 SV=1 && PF01370:NAD dependent epimerase/dehydratase family	M-type_MADS
123060502	2296.69	779.561	902.701	11341.4	7410.54	6936.79	1326.32	8562.89	-2.6909	8.19e-12	1.58e-09	LOC123060502	NC_057794.1	500099399	500100465	-	1067	protein_coding	chlorophyll a-b binding protein of LHCII type 1-like && sp|P07369|CB2G_SOLLC Chlorophyll a-b binding protein 3C, chloroplastic OS=Solanum lycopersicum OX=4081 GN=CAB3C PE=3 SV=1 && PF00504:Chlorophyll A-B binding protein	ERF
100240699	1374.85	809.473	1032.08	4109.76	3085.32	4095.86	1072.13	3763.65	-1.81194	8.37e-12	1.61e-09	LOC100240699	NC_057809.1	567677990	567681166	+	2090	protein_coding	ferredoxin-nitrite reductase && sp|Q42997|NIR_ORYSJ Ferredoxin--nitrite reductase, chloroplastic OS=Oryza sativa subsp. japonica OX=39947 GN=Os01g0357100 PE=2 SV=1 && PF01077:Nitrite and sulphite reductase 4Fe-4S domain|PF03460:Nitrite/Sulfite reductase ferredoxin-like half domain	-
123147421	180.568	141.144	250.86	19.2518	17.8974	41.2681	190.857	26.1391	2.86313	8.7e-12	1.67e-09	LOC123147421	NC_057812.1	437363831	437369375	+	2205	protein_coding	external alternative NAD(P)H-ubiquinone oxidoreductase B2%2C mitochondrial-like && sp|Q94BV7|NDB2_ARATH External alternative NAD(P)H-ubiquinone oxidoreductase B2, mitochondrial OS=Arabidopsis thaliana OX=3702 GN=NDB2 PE=1 SV=1 && PF07992:Pyridine nucleotide-disulphide oxidoreductase	-
123180387	3411.78	2564.89	2590.58	758.927	782.516	1092.67	2855.75	878.037	1.70125	8.98e-12	1.72e-09	LOC123180387	NC_057796.1	74479023	74484235	+	1993	protein_coding	alanine aminotransferase 2%2C transcript variant X1 && sp|P52894|ALA2_HORVU Alanine aminotransferase 2 OS=Hordeum vulgare OX=4513 PE=1 SV=1 && PF00155:Aminotransferase class I and II	-
123121415	53.8535	46.7363	274.563	2.02651	3.97721	1.87582	125.051	2.62651	5.57666	9.25e-12	1.76e-09	LOC123121415	NC_057808.1	313070465	313072893	+	2429	protein_coding	U-box domain-containing protein 19-like && sp|O80742|PUB19_ARATH U-box domain-containing protein 19 OS=Arabidopsis thaliana OX=3702 GN=PUB19 PE=2 SV=1 && PF04564:U-box domain	bHLH
123074733	151.001	49.5405	327.896	1.01325	3.97721	12.1928	176.146	5.72777	4.92802	9.63e-12	1.83e-09	LOC123074733	NC_057802.1	393260041	393260793	+	753	protein_coding	uncharacterized LOC123074733 && - && -	-
543313	0	0	0	55.729	47.7265	172.576	0	92.0104	-8.97981	9.78e-12	1.85e-09	LOC543313	NC_057797.1	64653771	64655365	-	1345	protein_coding	peroxidase-like && sp|Q05855|PER1_WHEAT Peroxidase OS=Triticum aestivum OX=4565 PE=2 SV=1 && PF00141:Peroxidase	NAC
123176938	2.1119	3.7389	6.91347	133.75	42.755	98.4807	4.25476	91.6617	-4.42185	9.97e-12	1.88e-09	LOC123176938	NC_057796.1	476518600	476519870	+	840	protein_coding	protein RADIALIS-like 3 && sp|Q6NNN0|RADL3_ARATH Protein RADIALIS-like 3 OS=Arabidopsis thaliana OX=3702 GN=RL3 PE=2 SV=1 && -	MYB_related
123122849	1851.08	932.857	1188.13	292.83	278.405	378.916	1324.02	316.717	2.06314	9.98e-12	1.88e-09	LOC123122849	NC_057808.1	468077110	468078189	+	1080	protein_coding	uncharacterized LOC123122849 && - && -	-
123169904	15.8393	28.9765	15.8022	112.471	174.997	130.37	20.206	139.279	-2.77877	1.01e-11	1.9e-09	LOC123169904	NC_057814.1	162452685	162453590	+	906	protein_coding	pathogenesis-related protein PRB1-2-like && sp|P35792|PR12_HORVU Pathogenesis-related protein PRB1-2 OS=Hordeum vulgare OX=4513 PE=2 SV=1 && PF00188:Cysteine-rich secretory protein family	M-type_MADS
123124668	479.402	242.094	429.623	72.9543	88.4929	85.3499	383.706	82.2657	2.2207	1.08e-11	2.03e-09	LOC123124668	NC_057808.1	279334553	279335604	-	956	protein_coding	holotricin-3-like && - && -	-
123046266	476.234	438.386	505.671	1134.84	1642.59	1692.93	473.43	1490.12	-1.6544	1.09e-11	2.03e-09	LOC123046266	NC_057798.1	606739343	606742989	-	1845	protein_coding	F-box protein PP2-A13-like && sp|Q9LEX0|P2A13_ARATH F-box protein PP2-A13 OS=Arabidopsis thaliana OX=3702 GN=PP2A13 PE=1 SV=1 && PF14299:Phloem protein 2	GRAS
123111836	29.5666	21.4987	15.8022	135.776	136.219	120.991	22.2892	130.995	-2.55914	1.09e-11	2.04e-09	LOC123111836	NC_057807.1	356152936	356157474	-	1825	protein_coding	enolase 1%2C chloroplastic-like && sp|Q9C9C4|ENO1_ARATH Enolase 1, chloroplastic OS=Arabidopsis thaliana OX=3702 GN=ENO1 PE=1 SV=1 && PF03952:Enolase, N-terminal domain|PF00113:Enolase, C-terminal TIM barrel domain	C3H
123055981	1624.05	1572.21	1159.49	487.375	506.1	491.466	1451.92	494.98	1.55248	1.1e-11	2.06e-09	LOC123055981	NC_057799.1	587526488	587533399	+	2567	protein_coding	uncharacterized LOC123055981 && sp|Q5FB34|ANRCS_VITVI Anthocyanidin reductase ((2S)-flavan-3-ol-forming) OS=Vitis vinifera OX=29760 GN=ANR PE=1 SV=1 && PF01370:NAD dependent epimerase/dehydratase family	GeBP
123147926	11215.3	8284.48	8789.98	2496.66	3044.55	3618.46	9429.9	3053.22	1.62683	1.12e-11	2.08e-09	LOC123147926	NC_057812.1	516870652	516876343	-	1983	protein_coding	spermine synthase-like%2C transcript variant X4 && sp|Q94BN2|SPSY_ARATH Spermine synthase OS=Arabidopsis thaliana OX=3702 GN=SPMS PE=1 SV=1 && PF01564:Spermine/spermidine synthase domain|PF17284:Spermidine synthase tetramerisation domain	NAC
123150984	986.258	1279.64	1131.83	395.169	395.732	428.625	1132.58	406.509	1.47833	1.27e-11	2.35e-09	LOC123150984	NC_057812.1	221099986	221106610	-	2286	protein_coding	probable amino-acid acetyltransferase NAGS2%2C chloroplastic && sp|B5X4Z4|NAGS2_ARATH Probable amino-acid acetyltransferase NAGS2, chloroplastic OS=Arabidopsis thaliana OX=3702 GN=NAGS2 PE=1 SV=1 && PF00583:Acetyltransferase (GNAT) family|PF00696:Amino acid kinase family	MYB_related
123054128	555.43	530.924	1393.56	151.988	140.197	90.0395	826.637	127.408	2.69846	1.35e-11	2.49e-09	LOC123054128	NC_057799.1	509963809	509971020	-	2940	protein_coding	SPX domain-containing membrane protein OsI_17046%2C transcript variant X1 && sp|B8AT51|SPXM2_ORYSI SPX domain-containing membrane protein OsI_17046 OS=Oryza sativa subsp. indica OX=39946 GN=OsI_17046 PE=3 SV=1 && PF03105:SPX domain|PF07690:Major Facilitator Superfamily	C3H
123110709	69.6928	60.7572	56.2954	2.02651	3.97721	1.87582	62.2484	2.62651	4.57078	1.38e-11	2.55e-09	LOC123110709	NC_057807.1	116700003	116700918	-	916	protein_coding	protein TsetseEP-like && - && -	-
123062759	432.94	369.217	350.612	1243.26	953.536	1365.6	384.256	1187.47	-1.62813	1.41e-11	2.6e-09	LOC123062759	NC_057800.1	633055424	633057370	-	1947	protein_coding	amidophosphoribosyltransferase%2C chloroplastic-like && sp|Q9SI61|ASE1_ARATH Amidophosphoribosyltransferase 1, chloroplastic OS=Arabidopsis thaliana OX=3702 GN=ASE1 PE=2 SV=1 && PF00156:Phosphoribosyl transferase domain|PF13537:Glutamine amidotransferase domain	-
123102278	172.12	205.64	455.301	41.5434	42.755	37.5165	277.687	40.605	2.77435	1.44e-11	2.65e-09	LOC123102278	NC_057806.1	52849598	52858495	+	6472	protein_coding	protein NETWORKED 1D-like%2C transcript variant X6 && sp|Q9LUI2|NET1A_ARATH Protein NETWORKED 1A OS=Arabidopsis thaliana OX=3702 GN=NET1A PE=1 SV=1 && PF07765:KIP1-like protein	bHLH
780687	145.721	49.5405	73.0852	1.01325	2.98291	6.56538	89.449	3.52051	4.64771	1.47e-11	2.69e-09	LOC780687	NC_057814.1	4634267	4637253	-	2265	protein_coding	sucrose_sucrose 1-fructosyltransferase && sp|Q9FSV7|SST_FESAR Sucrose:sucrose 1-fructosyltransferase OS=Festuca arundinacea OX=4606 GN=1-SST PE=1 SV=1 && PF08244:Glycosyl hydrolases family 32 C terminal|PF00251:Glycosyl hydrolases family 32 N-terminal domain	-
novel.2302	971.475	631.875	601.472	140.842	141.191	229.788	734.94	170.607	2.10577	1.47e-11	2.69e-09	-	NC_057808.1	105411630	105412539	+	868	-	- && - && -	-
123164646	3.16785	3.7389	0.987638	81.0603	50.7094	65.6538	2.63147	65.8078	-4.64064	1.48e-11	2.7e-09	LOC123164646	NC_057814.1	27770244	27772493	-	2019	protein_coding	7-deoxyloganetin glucosyltransferase-like%2C transcript variant X2 && sp|F8WLS6|UGT6_CATRO 7-deoxyloganetin glucosyltransferase OS=Catharanthus roseus OX=4058 GN=UGT85A23 PE=1 SV=1 && PF00201:UDP-glucoronosyl and UDP-glucosyl transferase	GRAS
100682467	1847.91	1140.37	2035.52	239.128	280.393	503.658	1674.6	341.06	2.29509	1.55e-11	2.81e-09	LOC100682467	NC_057811.1	144588885	144591843	+	982	protein_coding	probable peroxygenase 5 && sp|A0A1I9R3Y5|PXG_PINEL Peroxygenase OS=Pinus elliottii OX=42064 PE=1 SV=1 && PF05042:Caleosin related protein	-
123151651	229.141	39.2585	442.462	7.09278	15.9088	6.56538	236.954	9.85567	4.58897	1.56e-11	2.84e-09	LOC123151651	NC_057812.1	522650101	522651927	-	1827	protein_coding	berberine bridge enzyme-like Cyn d 4 && sp|Q5QJ60|CYND4_CYNDA Berberine bridge enzyme-like Cyn d 4 OS=Cynodon dactylon OX=28909 PE=1 SV=1 && PF01565:FAD binding domain|PF08031:Berberine and berberine like	CPP
123121908	182.68	147.687	277.526	36.4772	31.8177	43.1439	202.631	37.1462	2.44618	1.59e-11	2.88e-09	LOC123121908	NC_057808.1	377169235	377171983	+	2181	protein_coding	tonoplast dicarboxylate transporter-like && sp|Q8LG88|TDT_ARATH Tonoplast dicarboxylate transporter OS=Arabidopsis thaliana OX=3702 GN=TDT PE=2 SV=2 && PF00939:Sodium:sulfate symporter transmembrane region	-
123159121	353.744	229.943	595.546	59.782	82.5271	47.8335	393.077	63.3809	2.63335	1.61e-11	2.91e-09	LOC123159121	NC_057813.1	594967917	594972154	+	2131	protein_coding	IAA-amino acid hydrolase ILR1-like 6%2C transcript variant X1 && sp|Q5Z678|ILL6_ORYSJ IAA-amino acid hydrolase ILR1-like 6 OS=Oryza sativa subsp. japonica OX=39947 GN=ILL6 PE=2 SV=1 && PF01546:Peptidase family M20/M25/M40	C2H2
123062578	1026.38	553.358	614.311	129.697	193.889	180.079	731.351	167.888	2.12235	1.62e-11	2.91e-09	LOC123062578	NC_057800.1	610719542	610721778	+	1971	protein_coding	probable protein phosphatase 2C 9 && sp|Q5N9N2|P2C09_ORYSJ Probable protein phosphatase 2C 9 OS=Oryza sativa subsp. japonica OX=39947 GN=Os01g0846300 PE=2 SV=1 && PF00481:Protein phosphatase 2C	NAC
123074244	2195.32	1603.99	1358	370.851	354.966	584.319	1719.1	436.712	1.97642	1.63e-11	2.93e-09	LOC123074244	NC_057802.1	94868968	94870111	-	961	protein_coding	protein PHLOEM PROTEIN 2-LIKE A1-like && sp|C0HJV2|LEC_LUFAC Lectin OS=Luffa acutangula OX=56866 PE=1 SV=1 && PF14299:Phloem protein 2	GRAS
123143588	1393.86	776.757	740.729	5410.78	3875.79	3302.39	970.447	4196.32	-2.11265	1.65e-11	2.96e-09	LOC123143588	NC_057811.1	69621969	69622961	+	993	protein_coding	chlorophyll a-b binding protein of LHCII type 1-like && sp|P04784|CB21_WHEAT Chlorophyll a-b binding protein, chloroplastic OS=Triticum aestivum OX=4565 GN=WHAB1.6 PE=3 SV=1 && PF00504:Chlorophyll A-B binding protein	ERF
123112699	1189	888.924	734.803	303.976	270.45	226.037	937.576	266.821	1.81323	1.67e-11	2.99e-09	LOC123112699	NC_057807.1	488133478	488134939	+	1462	protein_coding	mitochondrial uncoupling protein 5-like && sp|Q9SJY5|PUMP5_ARATH Mitochondrial uncoupling protein 5 OS=Arabidopsis thaliana OX=3702 GN=PUMP5 PE=2 SV=1 && PF00153:Mitochondrial carrier protein	ERF
123040799	32.7345	27.1071	12.8393	129.697	159.088	251.36	24.2269	180.048	-2.8966	1.72e-11	3.07e-09	LOC123040799	NC_057798.1	130676062	130678367	-	937	protein_coding	protein RICE FLOWERING LOCUS T 1-like && sp|Q8VWH2|RFT1_ORYSJ Protein RICE FLOWERING LOCUS T 1 OS=Oryza sativa subsp. japonica OX=39947 GN=RFT1 PE=1 SV=1 && PF01161:Phosphatidylethanolamine-binding protein	NAC
123044947	210.134	108.428	228.144	30.3976	28.8348	30.0132	182.236	29.7485	2.61401	1.74e-11	3.1e-09	LOC123044947	NC_057798.1	369730157	369733486	+	1862	protein_coding	fasciclin-like arabinogalactan protein 15 && sp|Q66GR0|FLA17_ARATH Fasciclin-like arabinogalactan protein 17 OS=Arabidopsis thaliana OX=3702 GN=FLA17 PE=2 SV=1 && PF02469:Fasciclin domain	-
123085614	55.9654	11.2167	17.7775	450.898	258.519	212.906	28.3199	307.441	-3.44836	1.89e-11	3.36e-09	LOC123085614	NC_057803.1	138611486	138612597	-	1112	protein_coding	abscisic acid receptor PYL4-like && sp|O80920|PYL4_ARATH Abscisic acid receptor PYL4 OS=Arabidopsis thaliana OX=3702 GN=PYL4 PE=1 SV=1 && PF10604:Polyketide cyclase / dehydrase and lipid transport	MYB_related
123103637	50.6856	62.6266	163.948	2.02651	5.96581	0.937911	92.4201	2.97674	4.96654	1.9e-11	3.36e-09	LOC123103637	NC_057806.1	403843321	403845882	+	2562	protein_coding	U-box domain-containing protein 19-like && sp|Q9XIJ5|PUB18_ARATH U-box domain-containing protein 18 OS=Arabidopsis thaliana OX=3702 GN=PUB18 PE=1 SV=1 && PF04564:U-box domain	bHLH
123054058	230.197	140.209	207.404	34.4506	37.7835	45.0197	192.603	39.0846	2.29862	1.92e-11	3.4e-09	LOC123054058	NC_057799.1	494841662	494843015	+	1253	protein_coding	homeobox-leucine zipper protein HOX22-like && sp|Q01IK0|HOX22_ORYSI Homeobox-leucine zipper protein HOX22 OS=Oryza sativa subsp. indica OX=39946 GN=HOX22 PE=2 SV=2 && PF02183:Homeobox associated leucine zipper|PF00046:Homeodomain	HD-ZIP
123144473	581.829	821.624	4134.25	13.1723	34.8006	23.4478	1845.9	23.8069	6.27657	1.97e-11	3.49e-09	LOC123144473	NC_057811.1	207685805	207688714	-	2549	lncRNA	uncharacterized LOC123144473 && - && -	-
123062886	375.919	335.567	373.327	83.0868	99.4302	125.68	361.604	102.732	1.81399	2e-11	3.53e-09	LOC123062886	NC_057800.1	647042333	647045117	+	1575	protein_coding	fructokinase-1-like && sp|Q0JGZ6|SCRK1_ORYSJ Fructokinase-1 OS=Oryza sativa subsp. japonica OX=39947 GN=FRK1 PE=1 SV=2 && PF00294:pfkB family carbohydrate kinase	MIKC_MADS
123044356	130.938	176.663	363.451	36.4772	26.8462	25.3236	223.684	29.549	2.92193	2.01e-11	3.53e-09	LOC123044356	NC_057798.1	203771639	203773439	+	1138	protein_coding	classical arabinogalactan protein 9-like && - && -	-
123119552	1043.28	962.768	739.741	259.393	243.604	335.772	915.263	279.59	1.71034	2.15e-11	3.78e-09	LOC123119552	NC_057808.1	76055179	76057060	+	1786	protein_coding	UDP-glycosyltransferase 79-like && sp|Q7XT97|UGT79_ORYSJ UDP-glycosyltransferase 79 OS=Oryza sativa subsp. japonica OX=39947 GN=UGT79 PE=1 SV=2 && PF00201:UDP-glucoronosyl and UDP-glucosyl transferase	GRAS
123127978	267.156	355.196	290.366	1315.2	1071.86	795.349	304.239	1060.8	-1.80121	2.28e-11	3.98e-09	LOC123127978	NC_057809.1	475733994	475742191	+	2963	protein_coding	uncharacterized LOC123127978%2C transcript variant X1 && sp|Q9XIN0|LHW_ARATH Transcription factor LHW OS=Arabidopsis thaliana OX=3702 GN=LHW PE=1 SV=1 && PF14215:bHLH-MYC and R2R3-MYB transcription factors N-terminal	bHLH
123185680	6.33571	0	0	87.1399	81.5328	60.9642	2.1119	76.5456	-5.24561	2.47e-11	4.32e-09	LOC123185680	NC_057797.1	605437824	605441823	+	899	protein_coding	uncharacterized LOC123185680%2C transcript variant X1 && - && -	-
123043673	168.952	153.295	621.224	33.4374	26.8462	28.1373	314.491	29.4736	3.41596	2.65e-11	4.61e-09	LOC123043673	NC_057798.1	96448005	96453208	+	2462	protein_coding	probable inactive receptor kinase At5g58300 && sp|Q9LVM0|Y5830_ARATH Probable inactive receptor kinase At5g58300 OS=Arabidopsis thaliana OX=3702 GN=At5g58300 PE=1 SV=1 && PF00069:Protein kinase domain|PF13855:Leucine rich repeat	ERF
123063055	73.9166	152.36	176.787	728.53	569.735	583.381	134.355	627.215	-2.22122	2.65e-11	4.61e-09	LOC123063055	NC_057800.1	663125753	663128937	+	2800	protein_coding	transcription factor bHLH77-like%2C transcript variant X1 && sp|Q9CAA9|BH049_ARATH Transcription factor bHLH49 OS=Arabidopsis thaliana OX=3702 GN=BHLH49 PE=1 SV=1 && PF00010:Helix-loop-helix DNA-binding domain	bHLH
123150619	3.16785	0	1.97528	148.948	57.6695	48.7714	1.71438	85.1298	-5.67274	2.73e-11	4.73e-09	LOC123150619	NC_057812.1	15768354	15769422	+	981	protein_coding	probable glutathione S-transferase GSTU6 && sp|Q06398|GSTU6_ORYSJ Probable glutathione S-transferase GSTU6 OS=Oryza sativa subsp. japonica OX=39947 GN=GSTU6 PE=2 SV=2 && PF13417:Glutathione S-transferase, N-terminal domain	-
123112512	1525.85	1750.74	1248.37	4020.59	4004.06	4224.35	1508.32	4083	-1.43662	2.78e-11	4.8e-09	LOC123112512	NC_057795.1	142667834	142669150	+	1145	protein_coding	peroxidase A2-like && sp|Q9FG34|PER54_ARATH Peroxidase 54 OS=Arabidopsis thaliana OX=3702 GN=PER54 PE=2 SV=1 && PF00141:Peroxidase	NAC
123150588	1238.63	688.893	1498.25	318.162	231.672	213.844	1141.92	254.559	2.16557	2.79e-11	4.81e-09	LOC123150588	NC_057812.1	199448639	199451805	-	1467	protein_coding	anthranilate O-methyltransferase 2-like && sp|D9J0Z7|AAMT1_MAIZE Anthranilate O-methyltransferase 1 OS=Zea mays OX=4577 GN=AAMT1 PE=1 SV=1 && PF03492:SAM dependent carboxyl methyltransferase	MYB_related
123145988	721.215	628.136	369.377	154.015	131.248	94.729	572.909	126.664	2.17802	3.06e-11	5.27e-09	LOC123145988	NC_057811.1	470593563	470597708	-	1474	protein_coding	probable cinnamyl alcohol dehydrogenase 5 && sp|Q0J6T3|CADH5_ORYSJ Probable cinnamyl alcohol dehydrogenase 5 OS=Oryza sativa subsp. japonica OX=39947 GN=CAD5 PE=3 SV=2 && PF00107:Zinc-binding dehydrogenase|PF08240:Alcohol dehydrogenase GroES-like domain	HB-other
123153285	72.8606	45.8016	52.3448	218.863	294.313	221.347	57.0023	244.841	-2.10578	3.1e-11	5.32e-09	LOC123153285	NC_057812.1	3473731	3475890	+	1084	protein_coding	uncharacterized LOC123153285%2C transcript variant X2 && - && -	-
123070687	3808.82	2863.07	5459.66	656.589	1120.58	402.364	4043.85	726.51	2.47681	3.12e-11	5.35e-09	LOC123070687	NC_057801.1	518583927	518586681	-	2132	protein_coding	BURP domain-containing protein 3-like && sp|Q942D4|BURP3_ORYSJ BURP domain-containing protein 3 OS=Oryza sativa subsp. japonica OX=39947 GN=BURP3 PE=2 SV=1 && PF03181:BURP domain	-
123160612	920.789	592.616	1164.43	219.876	258.519	204.465	892.61	227.62	1.9714	3.19e-11	5.45e-09	LOC123160612	NC_057813.1	556608119	556609832	+	1372	protein_coding	uncharacterized LOC123160612 && - && PF03350:Uncharacterized protein family, UPF0114	-
123154145	166.84	65.4308	58.2707	0	0	2.81373	96.8472	0.937911	6.63531	3.19e-11	5.45e-09	LOC123154145	NC_057812.1	133324651	133325792	-	1142	protein_coding	uncharacterized LOC123154145 && - && PF05553:Cotton fibre expressed protein	-
123098276	1182.67	157.034	175.8	4.05302	1.9886	3.75165	505.166	3.26442	7.27303	3.2e-11	5.45e-09	LOC123098276	NC_057805.1	418213673	418214309	-	637	protein_coding	uncharacterized LOC123098276 && - && -	-
543420	19501.3	20694.8	28418.3	6226.45	8547.02	5190.4	22871.5	6654.62	1.78114	3.27e-11	5.55e-09	LOC543420	NC_057802.1	21336872	21337628	-	757	protein_coding	non-specific lipid-transfer protein 4.1 && sp|Q43767|NLT41_HORVU Non-specific lipid-transfer protein 4.1 OS=Hordeum vulgare OX=4513 GN=LTP4.1 PE=1 SV=1 && PF00234:Protease inhibitor/seed storage/LTP family	ARF
123190205	470.954	205.64	176.787	2099.46	1603.81	1192.09	284.46	1631.79	-2.52105	3.27e-11	5.55e-09	LOC123190205	NC_057797.1	682434820	682435777	-	958	protein_coding	36.4 kDa proline-rich protein-like && sp|Q00451|PRF1_SOLLC 36.4 kDa proline-rich protein OS=Solanum lycopersicum OX=4081 GN=TPRP-F1 PE=2 SV=1 && PF14547:Hydrophobic seed protein	Trihelix
123134141	69.6928	46.7363	272.588	7.09278	0.994302	3.75165	129.672	3.94624	5.04222	3.36e-11	5.68e-09	LOC123134141	NC_057810.1	361130749	361138864	-	1192	protein_coding	2-oxoglutarate-dependent dioxygenase DAO-like && sp|Q01IX6|DAO_ORYSI 2-oxoglutarate-dependent dioxygenase DAO OS=Oryza sativa subsp. indica OX=39946 GN=DAO PE=3 SV=1 && PF14226:non-haem dioxygenase in morphine synthesis N-terminal|PF03171:2OG-Fe(II) oxygenase superfamily	Dof
123040652	5.27975	0	1.97528	81.0603	132.242	41.2681	2.41834	84.8569	-5.17507	3.41e-11	5.75e-09	LOC123040652	NC_057798.1	103134409	103135968	-	1560	protein_coding	aspartyl protease family protein 2-like && - && PF14543:Xylanase inhibitor N-terminal|PF14541:Xylanase inhibitor C-terminal	-
123123437	3548	3146.29	3290.81	1235.16	1473.56	1166.76	3328.36	1291.82	1.36542	3.52e-11	5.92e-09	LOC123123437	NC_057808.1	523304672	523307174	-	1519	protein_coding	B2 protein-like && sp|C6TAQ0|NRPB_SOYBN DCD domain-containing protein NRP-B OS=Glycine max OX=3847 GN=NRP-B PE=2 SV=1 && PF10539:Development and cell death domain	-
123106502	39.0702	22.4334	21.728	182.386	146.162	134.121	27.7439	154.223	-2.48006	3.57e-11	5.99e-09	LOC123106502	NC_057806.1	42539696	42541618	+	563	protein_coding	glutaredoxin-C1-like && sp|Q7G8Y5|GRXC1_ORYSJ Glutaredoxin-C1 OS=Oryza sativa subsp. japonica OX=39947 GN=GRXC1 PE=3 SV=1 && PF00462:Glutaredoxin	-
123160498	369.583	235.551	183.701	18.2386	56.6752	33.7648	262.945	36.2262	2.85866	3.58e-11	5.99e-09	LOC123160498	NC_057813.1	178209463	178213867	+	2676	protein_coding	probable galactinol--sucrose galactosyltransferase 1%2C transcript variant X1 && sp|Q84VX0|RFS1_ARATH Probable galactinol--sucrose galactosyltransferase 1 OS=Arabidopsis thaliana OX=3702 GN=RFS1 PE=2 SV=1 && PF05691:Raffinose synthase or seed imbibition protein Sip1	-
123042414	148.889	76.6475	44.4437	0	3.97721	0	89.9934	1.32574	6.09861	3.79e-11	6.33e-09	LOC123042414	NC_057798.1	745407769	745408373	+	605	protein_coding	uncharacterized LOC123042414 && - && -	-
123085112	2656.77	981.462	890.85	263.446	164.06	71.2813	1509.69	166.262	3.18332	3.8e-11	6.34e-09	LOC123085112	NC_057803.1	58568205	58570072	+	1868	protein_coding	allene oxide synthase 2-like && sp|Q7XYS3|C74A2_ORYSJ Allene oxide synthase 2 OS=Oryza sativa subsp. japonica OX=39947 GN=CYP74A2 PE=2 SV=2 && PF00067:Cytochrome P450	MYB
123187957	2865.85	1705.87	2781.19	549.184	567.747	835.679	2450.97	650.87	1.91259	3.81e-11	6.34e-09	LOC123187957	NC_057797.1	128811764	128814095	-	1371	protein_coding	protein TIFY 10b-like && sp|Q8H395|TI10B_ORYSJ Protein TIFY 10b OS=Oryza sativa subsp. japonica OX=39947 GN=TIFY10B PE=1 SV=1 && PF09425:Divergent CCT motif|PF06200:tify domain	-
123172901	17.9512	5.60836	3.95055	158.068	103.407	81.5983	9.17003	114.358	-3.65664	3.82e-11	6.34e-09	LOC123172901	NC_057796.1	429980379	429981955	-	1335	protein_coding	acetylserotonin O-methyltransferase 1-like && sp|Q6EPG8|ASMT1_ORYSJ Acetylserotonin O-methyltransferase 1 OS=Oryza sativa subsp. japonica OX=39947 GN=ASMT1 PE=1 SV=1 && PF08100:Dimerisation domain|PF00891:O-methyltransferase domain	-
123061548	117.211	164.512	159.997	612.006	436.499	935.098	147.24	661.201	-2.16634	3.88e-11	6.44e-09	LOC123061548	NC_057800.1	438595447	438600069	+	1760	protein_coding	S-adenosyl-L-methionine-dependent uroporphyrinogen III methyltransferase%2C chloroplastic-like && sp|Q42606|UPM1_ARATH S-adenosyl-L-methionine-dependent uroporphyrinogen III methyltransferase, chloroplastic OS=Arabidopsis thaliana OX=3702 GN=UPM1 PE=1 SV=1 && PF00590:Tetrapyrrole (Corrin/Porphyrin) Methylases	-
novel.881	30.6226	140.209	66.1718	0	0	0	79.0011	0	8.77553	3.97e-11	6.57e-09	-	NC_057798.1	811663933	811666493	-	2375	-	- && - && -	TCP
123091779	1284.04	425.3	1740.22	137.803	173.009	188.52	1149.85	166.444	2.78797	4.05e-11	6.69e-09	LOC123091779	NC_057804.1	194373560	194375089	+	1530	protein_coding	xylanase inhibitor protein 1-like && sp|Q7GCM7|XIP1_ORYSJ Xylanase inhibitor protein 1 OS=Oryza sativa subsp. japonica OX=39947 GN=RIXI PE=1 SV=1 && PF00704:Glycosyl hydrolases family 18	C2H2
123111072	24.2869	25.2376	15.8022	191.505	123.293	106.922	21.7756	140.573	-2.68971	4.08e-11	6.72e-09	LOC123111072	NC_057807.1	217445170	217447997	-	1770	protein_coding	amino acid permease 6-like && sp|P92934|AAP6_ARATH Amino acid permease 6 OS=Arabidopsis thaliana OX=3702 GN=AAP6 PE=1 SV=1 && PF01490:Transmembrane amino acid transporter protein	MYB_related
123145061	31.6785	31.7807	36.5426	202.651	127.271	159.445	33.3339	163.122	-2.29054	4.28e-11	7.04e-09	LOC123145061	NC_057811.1	351404764	351406789	+	2026	protein_coding	uncharacterized LOC123145061 && - && PF03087:Arabidopsis protein of unknown function	-
123181005	50.6856	28.9765	201.478	0	0	0	93.7134	0	9.02003	4.34e-11	7.11e-09	LOC123181005	NC_057796.1	206630253	206637075	-	2301	protein_coding	very-long-chain aldehyde decarbonylase GL1-5-like && sp|B8BHF1|GLO15_ORYSI Very-long-chain aldehyde decarbonylase GL1-5 OS=Oryza sativa subsp. indica OX=39946 GN=GL1-5 PE=2 SV=1 && PF12076:WAX2 C-terminal domain|PF04116:Fatty acid hydroxylase superfamily	FAR1
123103118	359.023	484.188	644.928	147.935	117.328	101.294	496.046	122.186	2.02242	4.35e-11	7.11e-09	LOC123103118	NC_057806.1	315881580	315885154	+	2003	protein_coding	protein DETOXIFICATION 21-like%2C transcript variant X2 && sp|Q8W488|DTX21_ARATH Protein DETOXIFICATION 21 OS=Arabidopsis thaliana OX=3702 GN=DTX21 PE=1 SV=1 && PF01554:MatE	MYB
novel.447	0	3.7389	0.987638	135.776	33.8063	91.9153	1.57551	87.1659	-5.74121	4.46e-11	7.29e-09	-	NC_057796.1	476631867	476632976	+	735	-	- && sp|F4JVB8|RADL1_ARATH Protein RADIALIS-like 1 OS=Arabidopsis thaliana OX=3702 GN=RL1 PE=2 SV=1 && -	MYB_related
123097949	195.351	105.624	236.046	29.3844	32.812	20.6341	179.007	27.6101	2.69803	4.48e-11	7.3e-09	LOC123097949	NC_057805.1	365174771	365180460	+	1994	protein_coding	uncharacterized WD repeat-containing protein C2A9.03-like%2C transcript variant X1 && sp|Q9Y7K5|YGI3_SCHPO Uncharacterized WD repeat-containing protein C2A9.03 OS=Schizosaccharomyces pombe (strain 972 / ATCC 24843) OX=284812 GN=SPBC2A9.03 PE=4 SV=2 && PF00400:WD domain, G-beta repeat	C3H
123188684	47.5178	76.6475	60.2459	0	0	0	61.4704	0	8.41295	4.55e-11	7.4e-09	LOC123188684	NC_057797.1	366693934	366696028	-	2095	protein_coding	probable carboxylesterase 15 && sp|Q9FG13|CXE15_ARATH Probable carboxylesterase 15 OS=Arabidopsis thaliana OX=3702 GN=CXE15 PE=2 SV=1 && PF07859:alpha/beta hydrolase fold	NAC
123091751	516.36	512.23	225.182	2215.99	1686.34	1712.63	417.924	1871.65	-2.16303	4.58e-11	7.44e-09	LOC123091751	NC_057804.1	187901835	187905429	+	1840	protein_coding	ribulose bisphosphate carboxylase/oxygenase activase B%2C chloroplastic%2C transcript variant X2 && sp|Q42450|RCAB_HORVU Ribulose bisphosphate carboxylase/oxygenase activase B, chloroplastic OS=Hordeum vulgare OX=4513 GN=RCAB PE=2 SV=1 && PF00004:ATPase family associated with various cellular activities (AAA)	Trihelix
123093769	127.77	177.598	158.022	19.2518	33.8063	33.7648	154.463	28.941	2.41446	4.75e-11	7.69e-09	LOC123093769	NC_057804.1	639496475	639500759	+	1714	protein_coding	flavanone 3-dioxygenase 2-like && sp|Q8W2X5|FL3H2_ORYSJ Flavanone 3-dioxygenase 2 OS=Oryza sativa subsp. japonica OX=39947 GN=F3H-2 PE=1 SV=1 && PF03171:2OG-Fe(II) oxygenase superfamily|PF14226:non-haem dioxygenase in morphine synthesis N-terminal	STAT
novel.448	1.05595	9.34726	12.8393	200.624	62.641	128.494	7.7475	130.586	-4.06234	4.86e-11	7.85e-09	-	NC_057796.1	476636824	476638296	+	882	-	- && sp|Q6NNN0|RADL3_ARATH Protein RADIALIS-like 3 OS=Arabidopsis thaliana OX=3702 GN=RL3 PE=2 SV=1 && -	MYB_related
123173684	2520.55	1045.02	2133.3	262.433	509.083	256.988	1899.63	342.834	2.47015	5.06e-11	8.17e-09	LOC123173684	NW_025228251.1	16677	17493	-	817	protein_coding	non-specific lipid-transfer protein 4.1-like && sp|Q42842|NLT43_HORVU Non-specific lipid-transfer protein 4.3 OS=Hordeum vulgare OX=4513 GN=LTP4.3 PE=2 SV=1 && PF00234:Protease inhibitor/seed storage/LTP family	ARF
123145399	928.181	683.285	1182.2	262.433	262.496	296.38	931.223	273.77	1.76584	5.12e-11	8.23e-09	LOC123145399	NC_057811.1	403987426	403989405	-	1899	protein_coding	zinc finger protein CONSTANS-LIKE 16-like && sp|Q8RWD0|COL16_ARATH Zinc finger protein CONSTANS-LIKE 16 OS=Arabidopsis thaliana OX=3702 GN=COL16 PE=1 SV=2 && PF06203:CCT motif|PF00643:B-box zinc finger	CO-like
123048723	0	0	0	141.856	86.5043	22.5099	0	83.6233	-8.83976	5.14e-11	8.25e-09	LOC123048723	NC_057799.1	63266228	63267841	-	1614	protein_coding	aspartyl protease family protein 2-like && - && -	-
123122863	588.165	498.209	390.117	1380.05	1508.36	1415.31	492.164	1434.57	-1.54372	5.15e-11	8.26e-09	LOC123122863	NC_057808.1	469099633	469102099	-	1736	protein_coding	two pore potassium channel a-like%2C transcript variant X1 && sp|Q850M0|KCO1_ORYSJ Two pore potassium channel a OS=Oryza sativa subsp. japonica OX=39947 GN=TPKA PE=1 SV=1 && PF07885:Ion channel	C3H
123053566	2154.14	1111.39	1985.15	309.043	360.932	538.361	1750.23	402.778	2.11899	5.19e-11	8.3e-09	LOC123053566	NC_057799.1	422394923	422400144	-	1919	protein_coding	betaine aldehyde dehydrogenase-like && sp|Q40024|BADH_HORVU Betaine aldehyde dehydrogenase OS=Hordeum vulgare OX=4513 PE=2 SV=1 && PF00171:Aldehyde dehydrogenase family	bHLH
123060454	246.037	79.4517	278.514	14.1856	29.8291	16.8824	201.334	20.299	3.30986	5.2e-11	8.3e-09	LOC123060454	NC_057800.1	90746675	90748494	+	1820	protein_coding	UDP-glycosyltransferase 75C1-like && sp|F8WKW0|UGT1_GARJA Crocetin glucosyltransferase, chloroplastic OS=Gardenia jasminoides OX=114476 GN=UGT75L6 PE=1 SV=1 && PF00201:UDP-glucoronosyl and UDP-glucosyl transferase	ERF
123095798	519.528	607.572	1191.09	177.319	164.06	156.631	772.73	166.004	2.21899	5.21e-11	8.3e-09	LOC123095798	NC_057805.1	16342859	16347111	-	2976	protein_coding	linoleate 9S-lipoxygenase 1-like && sp|P29114|LOX1_HORVU Linoleate 9S-lipoxygenase 1 OS=Hordeum vulgare OX=4513 GN=LOX1.1 PE=1 SV=2 && PF00305:Lipoxygenase|PF01477:PLAT/LH2 domain	NF-YA
123052896	92.9237	115.906	145.183	578.568	502.123	342.338	118.004	474.343	-2.006	5.55e-11	8.83e-09	LOC123052896	NC_057799.1	311633392	311639237	-	1885	protein_coding	amino acid permease 6-like && sp|P92934|AAP6_ARATH Amino acid permease 6 OS=Arabidopsis thaliana OX=3702 GN=AAP6 PE=1 SV=1 && PF01490:Transmembrane amino acid transporter protein	MYB_related
123122549	223.862	338.371	710.112	60.7953	77.5556	52.523	424.115	63.6246	2.73752	5.59e-11	8.87e-09	LOC123122549	NC_057808.1	443679694	443683309	-	1918	protein_coding	protein PIN-LIKES 7-like%2C transcript variant X2 && sp|Q9FKY4|PILS7_ARATH Protein PIN-LIKES 7 OS=Arabidopsis thaliana OX=3702 GN=PILS7 PE=2 SV=1 && PF03547:Membrane transport protein	FAR1
123138415	110.875	110.298	85.9245	335.387	378.829	306.697	102.366	340.304	-1.73306	5.66e-11	8.96e-09	LOC123138415	NC_057810.1	635281847	635288998	-	3262	protein_coding	mitogen-activated protein kinase kinase kinase 3-like && sp|Q39008|M3K1_ARATH Mitogen-activated protein kinase kinase kinase 1 OS=Arabidopsis thaliana OX=3702 GN=MEKK1 PE=1 SV=2 && -	WRKY
123123804	133.05	40.1932	130.368	4.05302	8.94872	6.56538	101.204	6.52237	3.95276	5.91e-11	9.33e-09	LOC123123804	NC_057795.1	355072248	355073213	-	966	protein_coding	probable glutathione S-transferase GSTU6 && sp|Q06398|GSTU6_ORYSJ Probable glutathione S-transferase GSTU6 OS=Oryza sativa subsp. japonica OX=39947 GN=GSTU6 PE=2 SV=2 && PF13417:Glutathione S-transferase, N-terminal domain|PF13410:Glutathione S-transferase, C-terminal domain	-
123071421	403.373	354.261	333.822	121.591	110.368	122.866	363.819	118.275	1.62065	5.95e-11	9.38e-09	LOC123071421	NC_057801.1	642117808	642122018	+	1749	protein_coding	phosphatidylinositol_ceramide inositolphosphotransferase-like%2C transcript variant X1 && sp|B8ACH9|IPCS_ORYSI Phosphatidylinositol:ceramide inositolphosphotransferase OS=Oryza sativa subsp. indica OX=39946 GN=ERH1 PE=3 SV=1 && -	-
101290610	76.0285	35.5196	179.75	5.06627	0.994302	3.75165	97.0994	3.27074	4.89187	6.57e-11	1.03e-08	LOC101290610	NC_057798.1	139440772	139443440	-	1712	protein_coding	beta-glucosidase 26 && sp|A3BMZ5|BGL26_ORYSJ Beta-glucosidase 26 OS=Oryza sativa subsp. japonica OX=39947 GN=BGLU26 PE=1 SV=1 && PF00232:Glycosyl hydrolase family 1	C2H2
123068745	174.232	112.167	98.7638	13.1723	25.8519	14.0687	128.388	17.6976	2.85902	6.73e-11	1.06e-08	LOC123068745	NC_057801.1	80635444	80636725	+	1282	protein_coding	2-alkenal reductase (NADP(+)-dependent)-like && sp|Q9SLN8|DBR_TOBAC 2-alkenal reductase (NADP(+)-dependent) OS=Nicotiana tabacum OX=4097 GN=DBR PE=1 SV=1 && PF16884:N-terminal domain of oxidoreductase|PF00107:Zinc-binding dehydrogenase	-
123058536	104.539	88.799	108.64	3.03976	11.9316	15.9445	100.659	10.3053	3.27858	6.93e-11	1.09e-08	LOC123058536	NC_057800.1	521126746	521127816	-	971	protein_coding	heat stress transcription factor C-1b-like && sp|Q942D6|HFC1B_ORYSJ Heat stress transcription factor C-1b OS=Oryza sativa subsp. japonica OX=39947 GN=HSFC1B PE=2 SV=1 && PF00447:HSF-type DNA-binding	HSF
123078532	117.211	64.4961	344.686	14.1856	4.97151	13.1308	175.464	10.7626	4.02602	6.96e-11	1.09e-08	LOC123078532	NC_057802.1	299420874	299422757	+	1174	protein_coding	dnaJ homolog subfamily B member 7-like && sp|Q7Z6W7|DNJB7_HUMAN DnaJ homolog subfamily B member 7 OS=Homo sapiens OX=9606 GN=DNAJB7 PE=2 SV=2 && PF00226:DnaJ domain	C2H2
123097521	1635.67	1579.69	6884.83	413.408	390.761	383.606	3366.73	395.925	3.08807	6.99e-11	1.09e-08	LOC123097521	NC_057805.1	295332768	295346193	+	2976	protein_coding	sucrose synthase 4 && sp|Q10LP5|SUS4_ORYSJ Sucrose synthase 4 OS=Oryza sativa subsp. japonica OX=39947 GN=SUS4 PE=2 SV=1 && PF00862:Sucrose synthase|PF00534:Glycosyl transferases group 1	HB-other
123096736	801.467	885.185	296.291	6813.12	4105.47	2555.81	660.981	4491.47	-2.76446	7e-11	1.09e-08	LOC123096736	NC_057805.1	122028946	122032675	+	1857	protein_coding	ribulose bisphosphate carboxylase/oxygenase activase B%2C chloroplastic-like && sp|Q42450|RCAB_HORVU Ribulose bisphosphate carboxylase/oxygenase activase B, chloroplastic OS=Hordeum vulgare OX=4513 GN=RCAB PE=2 SV=1 && PF00004:ATPase family associated with various cellular activities (AAA)	Trihelix
123059822	82.3642	299.112	262.712	1809.67	2008.49	876.009	214.729	1564.72	-2.86426	7.1e-11	1.1e-08	LOC123059822	NC_057800.1	12010954	12012633	-	1477	protein_coding	WAT1-related protein At3g18200-like && sp|Q9LV20|WTR17_ARATH WAT1-related protein At3g18200 OS=Arabidopsis thaliana OX=3702 GN=At3g18200 PE=2 SV=1 && PF00892:EamA-like transporter family	ERF
123103148	246.037	200.031	221.231	62.8218	62.641	42.206	222.433	55.8896	1.99416	7.38e-11	1.14e-08	LOC123103148	NC_057806.1	321864494	321865708	-	1215	protein_coding	uncharacterized LOC123103148 && - && PF03168:Late embryogenesis abundant protein	-
123128719	287.219	97.2115	984.675	1.01325	3.97721	3.75165	456.368	2.91404	7.28661	7.52e-11	1.16e-08	LOC123128719	NC_057809.1	585423666	585424607	+	828	protein_coding	dehydrin DHN3-like && sp|P12948|DHN3_HORVU Dehydrin DHN3 OS=Hordeum vulgare OX=4513 GN=DHN3 PE=2 SV=1 && PF00257:Dehydrin	-
123188399	365.359	144.883	638.014	49.6495	52.698	41.2681	382.752	47.8719	2.99943	7.8e-11	1.2e-08	LOC123188399	NC_057797.1	210419107	210419932	+	826	protein_coding	probable glutathione S-transferase GSTU6 && sp|Q06398|GSTU6_ORYSJ Probable glutathione S-transferase GSTU6 OS=Oryza sativa subsp. japonica OX=39947 GN=GSTU6 PE=2 SV=2 && PF13410:Glutathione S-transferase, C-terminal domain|PF13417:Glutathione S-transferase, N-terminal domain	-
123169475	122.49	55.1488	119.504	2.02651	11.9316	7.50329	99.0478	7.15381	3.78677	7.83e-11	1.21e-08	LOC123169475	NC_057796.1	331092372	331093400	-	1029	protein_coding	probable calcium-binding protein CML15 && sp|Q6L4D4|CML15_ORYSJ Probable calcium-binding protein CML15 OS=Oryza sativa subsp. japonica OX=39947 GN=CML15 PE=2 SV=1 && PF13499:EF-hand domain pair	FAR1
123071879	96.0915	104.689	125.43	388.076	318.177	348.903	108.737	351.719	-1.69301	7.85e-11	1.21e-08	LOC123071879	NC_057801.1	704508365	704510773	+	1734	protein_coding	probable proline transporter 2 && sp|Q60DN5|PROT1_ORYSJ Proline transporter 1 OS=Oryza sativa subsp. japonica OX=39947 GN=PROT1 PE=2 SV=1 && PF01490:Transmembrane amino acid transporter protein	-
123055284	175.288	132.731	177.775	22.2916	12.9259	38.4544	161.931	24.5573	2.71611	7.93e-11	1.22e-08	LOC123055284	NC_057799.1	641739655	641740925	+	1271	protein_coding	NDR1/HIN1-like protein 10 && sp|Q9SJ52|NHL10_ARATH NDR1/HIN1-like protein 10 OS=Arabidopsis thaliana OX=3702 GN=NHL10 PE=2 SV=1 && PF03168:Late embryogenesis abundant protein	-
123142935	10238.5	12275.8	7866.54	3344.75	2823.82	1683.55	10126.9	2617.37	1.95208	8.26e-11	1.27e-08	LOC123142935	NC_057811.1	4658416	4662318	-	2901	protein_coding	lipoxygenase 2.2%2C chloroplastic-like && sp|Q8GSM3|LOX22_HORVU Lipoxygenase 2.2, chloroplastic OS=Hordeum vulgare OX=4513 GN=LOX2.2 PE=1 SV=1 && PF00305:Lipoxygenase	NF-YA
123169240	5087.57	2462.07	764.432	29.3844	52.698	6.56538	2771.36	29.5493	6.55225	8.36e-11	1.28e-08	LOC123169240	NC_057814.1	29746948	29749544	+	1325	protein_coding	uncharacterized LOC123169240 && - && PF01419:Jacalin-like lectin domain|PF03018:Dirigent-like protein	NAC
123071222	482.57	126.188	729.865	49.6495	22.869	51.5851	446.207	41.3678	3.43033	8.49e-11	1.3e-08	LOC123071222	NC_057801.1	603798794	603801550	-	1897	protein_coding	trans-cinnamate 4-monooxygenase && sp|P48522|TCMO_CATRO Trans-cinnamate 4-monooxygenase OS=Catharanthus roseus OX=4058 GN=CYP73A4 PE=2 SV=1 && PF00067:Cytochrome P450	B3
123097932	524.808	307.525	626.163	97.2724	134.231	105.046	486.165	112.183	2.11531	8.53e-11	1.3e-08	LOC123097932	NC_057805.1	362715080	362717617	+	1210	protein_coding	tropinone reductase homolog At5g06060-like && sp|Q9LHT0|TRNHF_ARATH Tropinone reductase homolog At5g06060 OS=Arabidopsis thaliana OX=3702 GN=At5g06060 PE=2 SV=1 && PF13561:Enoyl-(Acyl carrier protein) reductase	C2H2
123127312	299.89	265.462	567.892	55.729	91.4758	69.4054	377.748	72.2034	2.38713	8.73e-11	1.33e-08	LOC123127312	NC_057809.1	218108758	218110785	+	1780	protein_coding	pectate lyase-like && sp|P40973|PLY_LILLO Pectate lyase OS=Lilium longiflorum OX=4690 PE=2 SV=1 && PF04431:Pectate lyase, N terminus|PF00544:Pectate lyase	HD-ZIP
123190924	464.618	263.593	342.71	79.0338	71.5898	105.046	356.974	85.2232	2.06476	8.76e-11	1.33e-08	LOC123190924	NC_057797.1	755736865	755738063	+	982	protein_coding	heavy metal-associated isoprenylated plant protein 39-like && sp|O03982|HIP39_ARATH Heavy metal-associated isoprenylated plant protein 39 OS=Arabidopsis thaliana OX=3702 GN=HIPP39 PE=2 SV=1 && PF00403:Heavy-metal-associated domain	SBP
123176443	9.50356	9.34726	11.8517	111.458	71.5898	73.1571	10.2342	85.4016	-3.0602	8.91e-11	1.35e-08	LOC123176443	NW_025236493.1	3429	5239	+	1811	rRNA	18S ribosomal RNA && - && -	-
123191436	82.3642	71.9739	67.1594	309.043	396.727	216.658	73.8325	307.476	-2.05852	9.58e-11	1.45e-08	LOC123191436	NC_057794.1	88519950	88524871	+	2212	protein_coding	probable glucan endo-1%2C6-beta-glucosidase B && sp|Q876J3|EXG_SACU7 Glucan 1,3-beta-glucosidase OS=Saccharomyces uvarum (strain ATCC 76518 / CBS 7001 / CLIB 283 / NBRC 10550 / MCYC 623 / NCYC 2669 / NRRL Y-11845) OX=659244 GN=EXG1 PE=3 SV=1 && PF00150:Cellulase (glycosyl hydrolase family 5)	-
123167682	29.5666	8.41253	13.8269	199.611	170.026	94.729	17.2687	154.789	-3.17416	9.59e-11	1.45e-08	LOC123167682	NC_057814.1	408886538	408889904	-	1847	protein_coding	uncharacterized LOC123167682 && - && -	-
123121951	0	0	1.97528	156.041	129.259	48.7714	0.658425	111.357	-7.39727	9.88e-11	1.49e-08	LOC123121951	NC_057808.1	381798316	381800161	+	1395	protein_coding	cinnamoyl-CoA reductase 1-like && sp|Q9S9N9|CCR1_ARATH Cinnamoyl-CoA reductase 1 OS=Arabidopsis thaliana OX=3702 GN=CCR1 PE=1 SV=1 && PF01370:NAD dependent epimerase/dehydratase family	NAC
123114275	1702.19	1418.91	454.314	135.776	50.7094	197.899	1191.81	128.128	3.21683	9.96e-11	1.5e-08	LOC123114275	NC_057807.1	691261125	691262904	-	1061	protein_coding	probable thiol methyltransferase 2 && sp|Q6AWU6|HOL3_ARATH Probable thiol methyltransferase 2 OS=Arabidopsis thaliana OX=3702 GN=HOL3 PE=1 SV=1 && PF05724:Thiopurine S-methyltransferase (TPMT)	-
123141838	195.351	219.661	177.775	514.733	820.299	629.339	197.595	654.79	-1.7282	1e-10	1.51e-08	LOC123141838	NC_057795.1	605475941	605477685	+	1622	protein_coding	phospholipase A1-II 7-like && sp|A2Y7R2|PLA7_ORYSI Phospholipase A1-II 7 OS=Oryza sativa subsp. indica OX=39946 GN=OsI_21081 PE=3 SV=1 && PF01764:Lipase (class 3)	Trihelix
123165986	505.801	166.381	868.134	45.5964	71.5898	60.0263	513.439	59.0708	3.11923	1.02e-10	1.53e-08	LOC123165986	NC_057814.1	42255945	42259060	-	1267	protein_coding	hypersensitive-induced response protein 4-like && sp|Q9FHM7|HIR4_ARATH Hypersensitive-induced response protein 4 OS=Arabidopsis thaliana OX=3702 GN=HIR4 PE=1 SV=1 && PF01145:SPFH domain / Band 7 family	-
123149532	537.479	354.261	788.135	144.895	114.345	125.68	559.958	128.307	2.1257	1.04e-10	1.55e-08	LOC123149532	NC_057812.1	706681006	706686573	+	2070	protein_coding	probable plastidic glucose transporter 3%2C transcript variant X3 && sp|Q9FYG3|PLST2_ARATH Probable plastidic glucose transporter 2 OS=Arabidopsis thaliana OX=3702 GN=At1g67300 PE=2 SV=1 && PF00083:Sugar (and other) transporter	GRAS
123092756	2700.07	1961.06	3838.95	607.953	616.467	931.346	2833.36	718.589	1.97905	1.05e-10	1.57e-08	LOC123092756	NC_057804.1	467175458	467179425	+	1799	protein_coding	uncharacterized LOC123092756 && - && -	-
123046237	46.4618	53.2794	132.344	2.02651	4.97151	3.75165	77.3616	3.58322	4.42955	1.08e-10	1.61e-08	LOC123046237	NC_057798.1	600609271	600612060	+	2041	protein_coding	1-aminocyclopropane-1-carboxylate synthase-like && sp|P31531|1A1C_SOYBN 1-aminocyclopropane-1-carboxylate synthase OS=Glycine max OX=3847 GN=ACS1 PE=2 SV=1 && PF00155:Aminotransferase class I and II	-
123061433	546.983	595.42	2292.31	89.1664	117.328	172.576	1144.9	126.357	3.17912	1.08e-10	1.61e-08	LOC123061433	NC_057800.1	406859368	406863199	+	1188	protein_coding	dnaJ homolog subfamily B member 7-like && sp|Q9FL54|DNAJ6_ARATH Chaperone protein dnaJ 6 OS=Arabidopsis thaliana OX=3702 GN=ATJ6 PE=2 SV=1 && PF00226:DnaJ domain	C2H2
123077892	782.46	722.543	741.716	0	3.97721	14.0687	748.906	6.01529	6.9518	1.09e-10	1.62e-08	LOC123077892	NC_057802.1	136913215	136918569	-	1764	protein_coding	putative ubiquitin-conjugating enzyme E2 38%2C transcript variant X1 && sp|Q8VY10|UBC24_ARATH Probable ubiquitin-conjugating enzyme E2 24 OS=Arabidopsis thaliana OX=3702 GN=UBC24 PE=1 SV=1 && PF00179:Ubiquitin-conjugating enzyme	GRAS
123091054	67.5809	84.1253	44.4437	325.255	294.313	228.85	65.3833	282.806	-2.11134	1.11e-10	1.64e-08	LOC123091054	NC_057804.1	66529412	66536652	-	2027	protein_coding	calmodulin calcium-dependent NAD kinase-like && sp|Q0WUY1|NADKC_ARATH Calmodulin calcium-dependent NAD kinase OS=Arabidopsis thaliana OX=3702 GN=NADKC PE=1 SV=1 && PF06414:Zeta toxin	-
123128593	655.746	545.88	1758	132.736	127.271	193.21	986.541	151.072	2.70669	1.11e-10	1.64e-08	LOC123128593	NC_057809.1	568179996	568181231	+	1121	protein_coding	allene oxide cyclase%2C chloroplastic-like && sp|A2XID3|AOC_ORYSI Allene oxide cyclase, chloroplastic OS=Oryza sativa subsp. indica OX=39946 GN=AOC PE=2 SV=1 && PF06351:Allene oxide cyclase	-
123098649	154.169	153.295	212.342	808.577	602.547	483.962	173.269	631.695	-1.86592	1.12e-10	1.65e-08	LOC123098649	NC_057805.1	464338883	464343759	+	1948	protein_coding	serine/threonine-protein kinase RIPK-like && sp|Q9ZUF4|RIPK_ARATH Serine/threonine-protein kinase RIPK OS=Arabidopsis thaliana OX=3702 GN=RIPK PE=1 SV=1 && PF07714:Protein tyrosine kinase	Trihelix
123095908	2115.07	1474.06	5102.14	581.608	380.818	452.073	2897.09	471.5	2.61932	1.13e-10	1.67e-08	LOC123095908	NC_057805.1	27113719	27116242	+	1627	protein_coding	UV-B-induced protein At3g17800%2C chloroplastic-like && sp|Q9LVJ0|UVB31_ARATH UV-B-induced protein At3g17800, chloroplastic OS=Arabidopsis thaliana OX=3702 GN=At3g17800 PE=2 SV=1 && PF05542:Protein of unknown function (DUF760)	bZIP
123060559	424.492	316.872	274.563	31.4109	39.7721	92.8532	338.643	54.6787	2.62718	1.19e-10	1.74e-08	LOC123060559	NC_057800.1	109309649	109310951	-	1085	protein_coding	cold and drought-regulated protein CORA-like%2C transcript variant X2 && - && -	-
123061511	2898.59	2182.59	1702.69	6964.1	6362.54	7592.39	2261.29	6973.01	-1.62474	1.19e-10	1.75e-08	LOC123061511	NC_057800.1	430094804	430096375	-	678	protein_coding	MYB-like transcription factor TCL2%2C transcript variant X1 && sp|B3H4X8|TCL2_ARATH MYB-like transcription factor TCL2 OS=Arabidopsis thaliana OX=3702 GN=TCL2 PE=1 SV=1 && -	MYB_related
123105435	212.246	85.0601	173.824	953.472	981.376	528.982	157.044	821.277	-2.38802	1.22e-10	1.79e-08	LOC123105435	NC_057795.1	35280912	35282707	-	1796	protein_coding	3-ketoacyl-CoA synthase 12-like && sp|Q9SIB2|KCS12_ARATH 3-ketoacyl-CoA synthase 12 OS=Arabidopsis thaliana OX=3702 GN=KCS12 PE=2 SV=1 && PF08392:FAE1/Type III polyketide synthase-like protein|PF08541:3-Oxoacyl-[acyl-carrier-protein (ACP)] synthase III C terminal	B3
123076153	574.437	567.379	562.954	1532.04	1627.67	1254.93	568.257	1471.55	-1.37265	1.23e-10	1.79e-08	LOC123076153	NC_057802.1	58361442	58369600	-	2862	protein_coding	ectonucleotide pyrophosphatase/phosphodiesterase family member 1-like && sp|P06802|ENPP1_MOUSE Ectonucleotide pyrophosphatase/phosphodiesterase family member 1 OS=Mus musculus OX=10090 GN=Enpp1 PE=1 SV=4 && -	MYB_related
123125060	0	11.2167	13.8269	129.697	96.4473	116.301	8.34788	114.148	-3.7572	1.23e-10	1.79e-08	LOC123125060	NC_057808.1	388889908	388891225	-	720	protein_coding	protein RADIALIS-like 3 && sp|Q6NNN0|RADL3_ARATH Protein RADIALIS-like 3 OS=Arabidopsis thaliana OX=3702 GN=RL3 PE=2 SV=1 && PF00249:Myb-like DNA-binding domain	MYB_related
123068746	980.978	1327.31	1558.49	425.567	435.504	428.625	1288.93	429.899	1.58426	1.23e-10	1.79e-08	LOC123068746	NC_057801.1	80642080	80643329	+	1250	protein_coding	2-alkenal reductase (NADP(+)-dependent)-like && sp|Q9SLN8|DBR_TOBAC 2-alkenal reductase (NADP(+)-dependent) OS=Nicotiana tabacum OX=4097 GN=DBR PE=1 SV=1 && PF00107:Zinc-binding dehydrogenase|PF16884:N-terminal domain of oxidoreductase	-
123184887	124.602	57.0183	89.8751	6.07953	9.94302	11.2549	90.4985	9.09249	3.3091	1.23e-10	1.79e-08	LOC123184887	NC_057797.1	92872142	92873565	+	1424	protein_coding	probable carboxylesterase 18 && sp|Q9LT10|CXE18_ARATH Probable carboxylesterase 18 OS=Arabidopsis thaliana OX=3702 GN=CXE18 PE=1 SV=1 && PF07859:alpha/beta hydrolase fold	MYB_related
123160920	198.519	276.679	320.982	64.8483	75.567	62.8401	265.393	67.7518	1.97069	1.28e-10	1.85e-08	LOC123160920	NC_057813.1	436050070	436052780	-	1347	protein_coding	pre-mRNA cleavage factor Im 25 kDa subunit 1-like && sp|Q94AF0|CFIS1_ARATH Pre-mRNA cleavage factor Im 25 kDa subunit 1 OS=Arabidopsis thaliana OX=3702 GN=CFIS1 PE=1 SV=1 && PF13869:Nucleotide hydrolase	EIL
123052036	70.7487	71.9739	87.8998	6.07953	11.9316	8.4412	76.8741	8.81745	3.12335	1.29e-10	1.86e-08	LOC123052036	NC_057799.1	116856336	116860400	+	1655	protein_coding	2-hydroxy-6-oxo-6-phenylhexa-2%2C4-dienoate hydrolase-like && sp|O05235|YUGF_BACSU Uncharacterized hydrolase YugF OS=Bacillus subtilis (strain 168) OX=224308 GN=yugF PE=3 SV=1 && PF00561:alpha/beta hydrolase fold	CAMTA
543449	1442.43	784.235	1000.48	224.942	211.786	353.593	1075.71	263.44	2.02896	1.3e-10	1.88e-08	LOC543449	NC_057813.1	458980424	458982434	+	1476	protein_coding	flavone O-methyltransferase 1-like && sp|Q84N28|FOMT1_WHEAT Flavone O-methyltransferase 1 OS=Triticum aestivum OX=4565 GN=OMT1 PE=1 SV=1 && PF08100:Dimerisation domain|PF00891:O-methyltransferase domain	C3H
123065893	172.12	132.731	169.874	35.4639	21.8747	9.37911	158.242	22.2392	2.83658	1.39e-10	2e-08	LOC123065893	NC_057801.1	626146256	626147459	+	854	protein_coding	uncharacterized LOC123065893 && - && -	-
123090789	485.737	420.627	801.962	162.121	130.254	138.811	569.442	143.728	1.98636	1.43e-10	2.05e-08	LOC123090789	NC_057804.1	30167940	30173647	-	3020	protein_coding	probable linoleate 9S-lipoxygenase 4 && sp|Q53RB0|LOX4_ORYSJ Probable linoleate 9S-lipoxygenase 4 OS=Oryza sativa subsp. japonica OX=39947 GN=Os03g0700700 PE=2 SV=1 && PF00305:Lipoxygenase|PF01477:PLAT/LH2 domain	NF-YA
123119536	469.898	139.274	296.291	39.5169	46.7322	49.7093	301.821	45.3195	2.73402	1.45e-10	2.08e-08	LOC123119536	NC_057808.1	73649681	73650824	+	960	protein_coding	HVA22-like protein e && sp|Q07764|HVA22_HORVU Protein HVA22 OS=Hordeum vulgare OX=4513 GN=HVA22 PE=2 SV=1 && PF03134:TB2/DP1, HVA22 family	GeBP
101290675	23.2309	16.8251	47.4066	181.372	173.009	170.7	29.1542	175.027	-2.58688	1.5e-10	2.15e-08	LOC101290675	NC_057799.1	12006717	12008274	+	1450	protein_coding	putative 12-oxophytodienoate reductase 4 && sp|Q69TH8|OPR4_ORYSJ Putative 12-oxophytodienoate reductase 4 OS=Oryza sativa subsp. japonica OX=39947 GN=OPR4 PE=2 SV=1 && PF00724:NADH:flavin oxidoreductase / NADH oxidase family	NAC
123116229	81.3082	66.3655	50.3695	0	3.97721	0	66.0144	1.32574	5.65305	1.52e-10	2.17e-08	LOC123116229	NC_057807.1	402263309	402265119	+	1499	protein_coding	WRKY transcription factor WRKY76-like && sp|Q6IEK5|WRK76_ORYSI WRKY transcription factor WRKY76 OS=Oryza sativa subsp. indica OX=39946 GN=WRKY76 PE=2 SV=1 && PF03106:WRKY DNA -binding domain	WRKY
123159768	618.787	322.48	323.945	81.0603	74.5727	113.487	421.738	89.7068	2.23147	1.53e-10	2.18e-08	LOC123159768	NC_057813.1	99923506	99926359	+	1290	transcribed_pseudogene	annexin D1-like && sp|P93157|ANX1_GOSHI Annexin Gh1 (Fragment) OS=Gossypium hirsutum OX=3635 GN=AnnGh1 PE=1 SV=2 && PF00191:Annexin	MYB
123087273	133.05	114.971	112.591	26.3446	24.8576	15.0066	120.204	22.0696	2.44878	1.54e-10	2.19e-08	LOC123087273	NC_057803.1	591945883	591949053	+	2213	protein_coding	protein NRT1/ PTR FAMILY 8.3-like && sp|P46032|PTR2_ARATH Protein NRT1/ PTR FAMILY 8.3 OS=Arabidopsis thaliana OX=3702 GN=NPF8.3 PE=1 SV=1 && PF00854:POT family	G2-like
123164703	80.2523	75.7128	87.8998	345.52	257.524	250.422	81.2883	284.489	-1.80718	1.55e-10	2.21e-08	LOC123164703	NC_057814.1	487462172	487464188	+	1183	protein_coding	phosphatidylcholine_diacylglycerol cholinephosphotransferase 1-like && sp|Q9LVZ7|PDCT1_ARATH Phosphatidylcholine:diacylglycerol cholinephosphotransferase 1 OS=Arabidopsis thaliana OX=3702 GN=ROD1 PE=1 SV=1 && PF14360:PAP2 superfamily C-terminal	-
123054800	3335.75	2315.32	2314.04	750.821	571.724	982.931	2655.03	768.492	1.78837	1.58e-10	2.23e-08	LOC123054800	NC_057799.1	593978640	593981978	+	1665	protein_coding	serine hydroxymethyltransferase 4 && sp|O23254|GLYC4_ARATH Serine hydroxymethyltransferase 4 OS=Arabidopsis thaliana OX=3702 GN=SHM4 PE=1 SV=1 && PF00464:Serine hydroxymethyltransferase	HSF
123092481	74.9725	53.2794	134.319	4.05302	0.994302	9.37911	87.5236	4.80881	4.17157	1.6e-10	2.26e-08	LOC123092481	NC_057794.1	59700276	59702815	+	2540	pseudogene	- && - && PF13855:Leucine rich repeat|PF08263:Leucine rich repeat N-terminal domain	ERF
123085324	165.784	123.384	100.739	497.508	473.288	387.357	129.969	452.718	-1.80157	1.64e-10	2.31e-08	LOC123085324	NC_057803.1	88820203	88829170	-	1983	protein_coding	imidazole glycerol phosphate synthase hisHF%2C chloroplastic-like%2C transcript variant X1 && sp|Q9SZ30|HIS4_ARATH Imidazole glycerol phosphate synthase hisHF, chloroplastic OS=Arabidopsis thaliana OX=3702 GN=HISN4 PE=2 SV=1 && PF00977:Histidine biosynthesis protein|PF00117:Glutamine amidotransferase class-I	-
123072164	605.06	670.199	719.988	221.903	213.775	272.932	665.082	236.203	1.49313	1.64e-10	2.32e-08	LOC123072164	NC_057801.1	747504876	747509791	-	2289	protein_coding	2-hydroxyacyl-CoA lyase-like && sp|Q0JMH0|HACL_ORYSJ 2-hydroxyacyl-CoA lyase OS=Oryza sativa subsp. japonica OX=39947 GN=Os01g0505400 PE=3 SV=3 && PF00205:Thiamine pyrophosphate enzyme, central domain|PF02776:Thiamine pyrophosphate enzyme, N-terminal TPP binding domain|PF02775:Thiamine pyrophosphate enzyme, C-terminal TPP binding domain	-
123165176	284.051	436.517	425.672	1211.85	1050.98	1212.72	382.08	1158.52	-1.59966	1.66e-10	2.33e-08	LOC123165176	NC_057814.1	65997314	66006102	+	6063	protein_coding	disease resistance protein RGA5-like && sp|Q9STE7|R13L3_ARATH Putative disease resistance RPP13-like protein 3 OS=Arabidopsis thaliana OX=3702 GN=RPP13L3 PE=3 SV=1 && -	NAC
123104996	703.263	593.551	661.718	206.704	261.502	237.292	652.844	235.166	1.47272	1.67e-10	2.35e-08	LOC123104996	NC_057806.1	583362426	583365784	-	3187	protein_coding	heat stress transcription factor A-2a-like%2C transcript variant X2 && sp|Q84MN7|HFA2A_ORYSJ Heat stress transcription factor A-2a OS=Oryza sativa subsp. japonica OX=39947 GN=HSFA2A PE=2 SV=1 && -	HSF
123185787	705.375	393.52	505.671	85.1134	106.39	166.01	534.855	119.171	2.16441	1.67e-10	2.35e-08	LOC123185787	NC_057797.1	641714001	641715419	+	1314	protein_coding	homeobox-leucine zipper protein HOX22-like && sp|Q01IK0|HOX22_ORYSI Homeobox-leucine zipper protein HOX22 OS=Oryza sativa subsp. indica OX=39946 GN=HOX22 PE=2 SV=2 && PF00046:Homeodomain|PF02183:Homeobox associated leucine zipper	HD-ZIP
123095178	59.1333	93.4726	134.319	7.09278	4.97151	14.0687	95.6415	8.71099	3.44942	1.72e-10	2.41e-08	LOC123095178	NC_057804.1	548240306	548243769	-	2962	lncRNA	uncharacterized LOC123095178%2C transcript variant X1 && - && -	-
123066806	6.33571	9.34726	7.90111	109.431	64.6296	61.9022	7.86136	78.6544	-3.3162	1.75e-10	2.45e-08	LOC123066806	NC_057801.1	815855613	815858805	+	3193	protein_coding	receptor-like protein 6 && sp|Q5MR23|9DC3_SOLPI Receptor-like protein 9DC3 OS=Solanum pimpinellifolium OX=4084 GN=9DC3 PE=3 SV=1 && PF08263:Leucine rich repeat N-terminal domain|PF13855:Leucine rich repeat	MYB_related
123141561	164.728	74.7781	223.206	9.11929	12.9259	25.3236	154.238	15.7896	3.28164	1.78e-10	2.49e-08	LOC123141561	NC_057811.1	329149104	329150944	-	1841	protein_coding	ethylene-responsive transcription factor ERF054-like && sp|Q9SKT1|ERF53_ARATH Ethylene-responsive transcription factor ERF053 OS=Arabidopsis thaliana OX=3702 GN=ERF053 PE=1 SV=1 && PF00847:AP2 domain	ERF
123098181	929.237	454.277	664.681	201.638	118.322	96.6049	682.731	138.855	2.29834	1.79e-10	2.5e-08	LOC123098181	NC_057805.1	400854968	400856819	-	1852	protein_coding	allene oxide synthase 2-like && sp|Q7XYS3|C74A2_ORYSJ Allene oxide synthase 2 OS=Oryza sativa subsp. japonica OX=39947 GN=CYP74A2 PE=2 SV=2 && PF00067:Cytochrome P450	MYB
123062844	348.464	275.744	260.736	864.306	786.493	789.721	294.981	813.507	-1.46414	1.86e-10	2.58e-08	LOC123062844	NC_057800.1	643175117	643180597	+	2132	protein_coding	uncharacterized protein At3g49140-like && sp|Q0WMN5|Y3913_ARATH Uncharacterized protein At3g49140 OS=Arabidopsis thaliana OX=3702 GN=At3g49140 PE=1 SV=2 && -	FAR1
100415857	10017.8	4398.82	5759.91	1912.01	1645.57	1480.96	6725.51	1679.51	2.00158	1.86e-10	2.58e-08	LOC100415857	NC_057798.1	112187804	112189376	-	1573	protein_coding	vegetative cell wall protein gp1 && - && -	-
123143960	109.819	105.624	109.628	314.109	312.211	328.269	108.357	318.196	-1.55442	1.88e-10	2.61e-08	LOC123143960	NC_057811.1	112561636	112565427	+	1152	protein_coding	OVARIAN TUMOR DOMAIN-containing deubiquitinating enzyme 2-like && sp|Q9LPT6|OTU2_ARATH OVARIAN TUMOR DOMAIN-containing deubiquitinating enzyme 2 OS=Arabidopsis thaliana OX=3702 GN=OTU2 PE=1 SV=1 && PF02338:OTU-like cysteine protease	-
123069825	1719.09	649.635	1624.66	222.916	285.365	310.449	1331.13	272.91	2.28576	1.89e-10	2.61e-08	LOC123069825	NC_057794.1	582667518	582668470	+	839	protein_coding	late embryogenesis abundant protein Lea14-A-like && sp|P46518|LEA14_GOSHI Late embryogenesis abundant protein Lea14-A OS=Gossypium hirsutum OX=3635 GN=LEA14-A PE=2 SV=1 && PF03168:Late embryogenesis abundant protein	NAC
123139332	3896.46	2418.14	2394.04	863.293	803.396	1016.7	2902.88	894.462	1.6982	1.93e-10	2.66e-08	LOC123139332	NC_057810.1	691815817	691821515	+	1795	protein_coding	betaine aldehyde dehydrogenase 2-like && sp|B3VMC0|BADH2_ORYSI Betaine aldehyde dehydrogenase 2 OS=Oryza sativa subsp. indica OX=39946 GN=BADH2 PE=2 SV=1 && PF00171:Aldehyde dehydrogenase family	bHLH
123053389	3455.07	5880.36	6622.11	1589.8	1556.08	1620.71	5319.18	1588.86	1.74325	1.98e-10	2.73e-08	LOC123053389	NC_057799.1	397399556	397407431	-	2907	protein_coding	chloride channel protein CLC-c-like && sp|Q96282|CLCC_ARATH Chloride channel protein CLC-c OS=Arabidopsis thaliana OX=3702 GN=CLC-C PE=1 SV=1 && PF00654:Voltage gated chloride channel	-
123147487	432.94	440.256	680.483	161.107	154.117	134.121	517.893	149.782	1.79024	1.99e-10	2.74e-08	LOC123147487	NC_057812.1	449173265	449177825	-	1802	protein_coding	lysine histidine transporter 2-like && sp|Q9FKS8|LHT1_ARATH Lysine histidine transporter 1 OS=Arabidopsis thaliana OX=3702 GN=LHT1 PE=1 SV=1 && PF01490:Transmembrane amino acid transporter protein	MYB_related
123089595	171.064	156.099	79.0111	19.2518	21.8747	21.572	135.391	20.8995	2.69477	2.01e-10	2.76e-08	LOC123089595	NC_057795.1	216581904	216584302	-	958	protein_coding	bidirectional sugar transporter SWEET3a-like && sp|Q5NAZ9|SWT3B_ORYSJ Bidirectional sugar transporter SWEET3b OS=Oryza sativa subsp. japonica OX=39947 GN=SWEET3B PE=3 SV=2 && PF03083:Sugar efflux transporter for intercellular exchange	DBB
123190446	2416.02	1986.29	1966.39	877.478	858.083	848.81	2122.9	861.457	1.30111	2.02e-10	2.77e-08	LOC123190446	NC_057794.1	66176159	66182134	-	1371	protein_coding	CBL-interacting protein kinase 17-like && sp|Q75L42|CIPKH_ORYSJ CBL-interacting protein kinase 17 OS=Oryza sativa subsp. japonica OX=39947 GN=CIPK17 PE=2 SV=1 && PF00069:Protein kinase domain|PF03822:NAF domain	bHLH
123084961	146.777	73.8434	237.033	11.1458	19.886	20.6341	152.551	17.222	3.14398	2.07e-10	2.83e-08	LOC123084961	NC_057803.1	36368044	36371938	-	1824	protein_coding	aminotransferase ALD1 homolog%2C transcript variant X1 && sp|Q6VMN7|ALD1_ORYSJ Aminotransferase ALD1 homolog OS=Oryza sativa subsp. japonica OX=39947 GN=ALD1 PE=2 SV=1 && PF00155:Aminotransferase class I and II	-
123141283	106.651	23.3681	66.1718	0	0	0	65.397	0	8.49916	2.09e-10	2.85e-08	LOC123141283	NC_057811.1	111932933	111933440	-	508	protein_coding	uncharacterized LOC123141283 && - && -	-
123132549	1074.96	634.679	1499.23	206.704	280.393	266.367	1069.62	251.155	2.09016	2.2e-10	3e-08	LOC123132549	NC_057809.1	147002478	147011860	-	2151	protein_coding	succinate-semialdehyde dehydrogenase%2C mitochondrial-like && sp|B9F3B6|SSDH_ORYSJ Succinate-semialdehyde dehydrogenase, mitochondrial OS=Oryza sativa subsp. japonica OX=39947 GN=ALDH5F1 PE=3 SV=1 && PF00171:Aldehyde dehydrogenase family	bHLH
123047427	201.687	128.057	403.944	43.5699	24.8576	32.8269	244.563	33.7515	2.85762	2.4e-10	3.26e-08	LOC123047427	NC_057798.1	788927553	788932354	+	2136	protein_coding	fructan 6-exohydrolase-like%2C transcript variant X1 && sp|Q2UXF7|6FEH_WHEAT Fructan 6-exohydrolase OS=Triticum aestivum OX=4565 GN=6-FEH PE=1 SV=1 && PF08244:Glycosyl hydrolases family 32 C terminal|PF00251:Glycosyl hydrolases family 32 N-terminal domain	-
123087349	582.885	305.655	749.617	75.9941	75.567	144.438	546.053	98.6665	2.46686	2.46e-10	3.34e-08	LOC123087349	NC_057803.1	595629415	595631745	+	728	protein_coding	glutathione transferase FosA-like && - && PF00903:Glyoxalase/Bleomycin resistance protein/Dioxygenase superfamily	-
123138796	2284.02	929.118	2345.64	0	0	6.56538	1852.93	2.18846	9.7107	2.47e-10	3.35e-08	LOC123138796	NC_057794.1	401493104	401494507	-	1328	protein_coding	E3 ubiquitin-protein ligase EL5-like && sp|Q9LRB7|EL5_ORYSJ E3 ubiquitin-protein ligase EL5 OS=Oryza sativa subsp. japonica OX=39947 GN=EL5.1 PE=1 SV=1 && PF13639:Ring finger domain	WOX
123069789	124.602	150.491	183.701	890.65	730.812	393.923	152.931	671.795	-2.13444	2.51e-10	3.4e-08	LOC123069789	NC_057794.1	582263063	582268861	+	3032	protein_coding	uncharacterized AAA domain-containing protein C16E9.10c-like && sp|Q6NW58|SPAST_DANRE Spastin OS=Danio rerio OX=7955 GN=spast PE=2 SV=2 && PF17862:AAA+ lid domain|PF00004:ATPase family associated with various cellular activities (AAA)	Trihelix
100682406	984.146	945.943	1731.33	379.97	317.182	307.635	1220.47	334.929	1.86568	2.57e-10	3.47e-08	LOC100682406	NC_057808.1	196510292	196530147	+	2080	protein_coding	2-oxoisovalerate dehydrogenase subunit alpha 2%2C mitochondrial && sp|Q84JL2|ODBA2_ARATH 2-oxoisovalerate dehydrogenase subunit alpha 2, mitochondrial OS=Arabidopsis thaliana OX=3702 GN=At5g09300 PE=1 SV=1 && PF00676:Dehydrogenase E1 component	E2F/DP
123054464	5634.55	2392.9	1781.7	562.356	723.852	434.253	3269.72	573.487	2.51135	2.57e-10	3.47e-08	LOC123054464	NC_057799.1	555857155	555859567	+	794	protein_coding	late embryogenesis abundant protein At5g17165-like && sp|F4KFM8|LEA65_ARATH Late embryogenesis abundant protein At5g17165 OS=Arabidopsis thaliana OX=3702 GN=At5g17165 PE=3 SV=1 && -	-
542993	205.91	48.6058	262.712	6.07953	18.8917	12.1928	172.409	12.388	3.79705	2.61e-10	3.51e-08	LOC542993	NC_057796.1	265738744	265739760	-	1017	protein_coding	probable glutathione S-transferase GSTU6 && sp|Q06398|GSTU6_ORYSJ Probable glutathione S-transferase GSTU6 OS=Oryza sativa subsp. japonica OX=39947 GN=GSTU6 PE=2 SV=2 && PF13410:Glutathione S-transferase, C-terminal domain|PF13417:Glutathione S-transferase, N-terminal domain	-
123181194	1895.43	1413.31	1633.55	359.705	625.416	302.007	1647.43	429.043	1.94117	2.68e-10	3.6e-08	LOC123181194	NC_057796.1	237137275	237137873	+	599	protein_coding	non-specific lipid-transfer protein 2P-like && sp|Q10ST8|NLTPX_ORYSJ Non-specific lipid-transfer protein 2 OS=Oryza sativa subsp. japonica OX=39947 GN=LTP-2 PE=1 SV=1 && PF14368:Probable lipid transfer	bHLH
123060777	957.748	569.248	1037.02	257.367	229.684	252.298	854.672	246.45	1.7938	2.78e-10	3.73e-08	LOC123060777	NC_057800.1	154403890	154405941	+	1949	protein_coding	cytochrome P450 71A1-like && sp|A0A068Q6L2|C7317_PRUMU Cytochrome P450 736A117 OS=Prunus mume OX=102107 GN=CYP736A117 PE=2 SV=1 && PF00067:Cytochrome P450	E2F/DP
123112409	165.784	37.389	180.738	11.1458	8.94872	8.4412	127.97	9.51191	3.75049	2.89e-10	3.87e-08	LOC123112409	NC_057807.1	452212491	452216832	-	1545	protein_coding	lysine-specific demethylase JMJ30-like && sp|Q8RWR1|JMJ30_ARATH Lysine-specific demethylase JMJ30 OS=Arabidopsis thaliana OX=3702 GN=JMJ30 PE=1 SV=1 && PF13621:Cupin-like domain	NAC
123145578	136.218	107.493	101.727	348.559	333.091	407.991	115.146	363.214	-1.65883	2.92e-10	3.9e-08	LOC123145578	NC_057811.1	427961165	427963266	+	1720	protein_coding	uncharacterized LOC123145578%2C transcript variant X3 && - && -	-
123062787	271.379	221.53	164.936	817.696	619.45	706.247	219.282	714.465	-1.70466	2.93e-10	3.92e-08	LOC123062787	NC_057800.1	637384485	637389833	-	3019	protein_coding	receptor protein-tyrosine kinase CEPR2-like && sp|Q9C7T7|CEPR2_ARATH Receptor protein-tyrosine kinase CEPR2 OS=Arabidopsis thaliana OX=3702 GN=CEPR2 PE=1 SV=1 && PF13855:Leucine rich repeat|PF08263:Leucine rich repeat N-terminal domain	-
123151312	72.8606	125.253	374.315	0	0	0	190.81	0	10.046	2.96e-10	3.94e-08	LOC123151312	NC_057812.1	441981446	441983377	+	1932	protein_coding	purine-uracil permease NCS1-like && sp|Q9LZD0|NCS1_ARATH Purine-uracil permease NCS1 OS=Arabidopsis thaliana OX=3702 GN=NCS1 PE=1 SV=1 && PF02133:Permease for cytosine/purines, uracil, thiamine, allantoin	-
123120870	218.582	111.232	346.661	20.2651	43.7493	23.4478	225.492	29.1541	2.95145	2.99e-10	3.98e-08	LOC123120870	NC_057794.1	300387954	300389103	-	1150	protein_coding	uncharacterized LOC123120870 && sp|C0HJG8|BSP_BOSSE Basic secretory protease (Fragments) OS=Boswellia serrata OX=613112 PE=1 SV=1 && PF04450:Peptidase of plants and bacteria	-
123104274	831.033	429.974	546.164	153.001	137.214	181.017	602.39	157.077	1.93833	3.01e-10	4e-08	LOC123104274	NC_057806.1	490392988	490394987	+	1280	protein_coding	chloroplast envelope quinone oxidoreductase homolog && sp|Q9SV68|QORH_ARATH Chloroplast envelope quinone oxidoreductase homolog OS=Arabidopsis thaliana OX=3702 GN=CEQORH PE=1 SV=1 && PF08240:Alcohol dehydrogenase GroES-like domain|PF13602:Zinc-binding dehydrogenase	HB-other
123124773	110.875	28.0418	156.047	5.06627	4.97151	5.62747	98.3212	5.22175	4.23282	3.02e-10	4e-08	LOC123124773	NC_057808.1	322187395	322187959	+	565	protein_coding	uncharacterized LOC123124773 && - && -	-
123111084	826.81	1094.56	1834.04	277.632	299.285	358.282	1251.81	311.733	2.0055	3.09e-10	4.08e-08	LOC123111084	NC_057807.1	219887365	219890684	+	2035	protein_coding	2-oxoisovalerate dehydrogenase subunit alpha 2%2C mitochondrial-like%2C transcript variant X2 && sp|Q84JL2|ODBA2_ARATH 2-oxoisovalerate dehydrogenase subunit alpha 2, mitochondrial OS=Arabidopsis thaliana OX=3702 GN=At5g09300 PE=1 SV=1 && PF00676:Dehydrogenase E1 component	E2F/DP
123180973	644.13	338.371	2031.57	58.7687	87.4986	145.376	1004.69	97.2145	3.36858	3.11e-10	4.11e-08	LOC123180973	NC_057796.1	202575613	202579626	-	1347	protein_coding	uncharacterized LOC123180973 && - && PF07063:Domain of unknown function (DUF1338)	-
123151125	121.434	128.057	150.121	339.44	467.322	536.485	133.204	447.749	-1.74913	3.12e-10	4.11e-08	LOC123151125	NC_057812.1	463824240	463825783	-	1455	protein_coding	peroxidase 47-like && sp|Q9SZB9|PER47_ARATH Peroxidase 47 OS=Arabidopsis thaliana OX=3702 GN=PER47 PE=2 SV=2 && PF00141:Peroxidase	NAC
123111429	291.442	285.091	235.058	93.2194	76.5613	75.0329	270.531	81.6045	1.72971	3.16e-10	4.16e-08	LOC123111429	NC_057807.1	286095706	286101242	+	2365	protein_coding	phosphoinositide phospholipase C 6-like && sp|Q8GV43|PLCD6_ARATH Phosphoinositide phospholipase C 6 OS=Arabidopsis thaliana OX=3702 GN=PLC6 PE=2 SV=2 && PF00387:Phosphatidylinositol-specific phospholipase C, Y domain|PF00388:Phosphatidylinositol-specific phospholipase C, X domain|PF00168:C2 domain	NF-X1
123083371	1117.2	907.619	572.83	123.617	265.479	115.363	865.882	168.153	2.36465	3.23e-10	4.24e-08	LOC123083371	NC_057803.1	717969362	717971536	-	1245	pseudogene	- && sp|Q53QK0|Y1103_ORYSJ Flavonoid O-methyltransferase-like protein Os11g0303600 OS=Oryza sativa subsp. japonica OX=39947 GN=Os11g0303600 PE=2 SV=1 && PF08100:Dimerisation domain|PF00891:O-methyltransferase domain	-
123055645	116.155	60.7572	234.07	883.558	1597.84	601.201	136.994	1027.53	-2.90737	3.23e-10	4.24e-08	LOC123055645	NC_057799.1	62214260	62218878	+	2183	protein_coding	peroxidase 70-like && sp|A5H452|PER70_MAIZE Peroxidase 70 OS=Zea mays OX=4577 GN=PER70 PE=1 SV=1 && PF00141:Peroxidase	NAC
123092723	299.89	430.909	342.71	1799.54	1025.13	1068.28	357.836	1297.65	-1.85797	3.27e-10	4.28e-08	LOC123092723	NC_057804.1	462984164	462990031	+	3522	protein_coding	beta-galactosidase 6-like && sp|Q10NX8|BGAL6_ORYSJ Beta-galactosidase 6 OS=Oryza sativa subsp. japonica OX=39947 GN=Os03g0255100 PE=1 SV=2 && PF01301:Glycosyl hydrolases family 35|PF02140:Galactose binding lectin domain|PF17834:Beta-sandwich domain in beta galactosidase	MYB_related
123102303	573.381	1094.56	903.689	3830.1	3530.77	2328.83	857.211	3229.9	-1.91341	3.31e-10	4.33e-08	LOC123102303	NC_057806.1	56901736	56906313	-	1256	protein_coding	light-inducible protein CPRF2-like && sp|Q99090|CPRF2_PETCR Light-inducible protein CPRF2 OS=Petroselinum crispum OX=4043 GN=CPRF2 PE=2 SV=2 && PF12498:Basic leucine-zipper C terminal|PF00170:bZIP transcription factor	bZIP
123148255	13.7274	2.80418	2.96291	65.8615	82.5271	112.549	6.49815	86.9793	-3.76721	3.4e-10	4.44e-08	LOC123148255	NC_057812.1	562691255	562694870	-	3295	protein_coding	probable methyltransferase PMT24 && sp|Q9SD39|PMTR_ARATH Probable methyltransferase PMT27 OS=Arabidopsis thaliana OX=3702 GN=At3g51070 PE=3 SV=1 && PF03141:Putative S-adenosyl-L-methionine-dependent methyltransferase	NF-YB
123087453	19.0071	135.535	55.3077	0	0	0	69.95	0	8.60006	3.49e-10	4.54e-08	LOC123087453	NC_057803.1	604280318	604283536	-	2760	protein_coding	uncharacterized LOC123087453 && - && -	-
123146360	49794.4	30276.7	27684.5	10621.9	10117	12220	35918.5	10986.3	1.709	3.52e-10	4.58e-08	LOC123146360	NC_057811.1	492580751	492581793	+	742	lncRNA	uncharacterized LOC123146360 && - && -	C3H
123068318	95.0356	129.927	115.554	596.807	492.18	296.38	113.505	461.789	-2.02308	3.53e-10	4.59e-08	LOC123068318	NC_057801.1	21992490	21997668	-	2385	pseudogene	- && sp|Q339N5|CSLH1_ORYSJ Cellulose synthase-like protein H1 OS=Oryza sativa subsp. japonica OX=39947 GN=CSLH1 PE=2 SV=2 && PF03552:Cellulose synthase	LBD
123080881	52.7975	47.671	30.6168	170.227	184.94	320.766	43.6951	225.311	-2.36793	3.59e-10	4.65e-08	LOC123080881	NC_057802.1	604149408	604150513	+	1010	protein_coding	glycine-rich cell wall structural protein 2-like && sp|Q08655|ASR1_SOLLC Abscisic stress-ripening protein 1 OS=Solanum lycopersicum OX=4081 GN=ASR1 PE=2 SV=1 && PF02496:ABA/WDS induced protein	-
123124586	72.8606	93.4726	75.0605	0	1.9886	0	80.4646	0.662868	6.94224	3.6e-10	4.65e-08	LOC123124586	NC_057808.1	235370190	235372230	-	1241	protein_coding	transcription factor WRKY19-like && sp|Q9SHB5|WRK55_ARATH WRKY transcription factor 55 OS=Arabidopsis thaliana OX=3702 GN=WRKY55 PE=2 SV=1 && PF03106:WRKY DNA -binding domain	WRKY
123096495	1134.09	839.384	606.41	203.664	288.348	184.769	859.962	225.593	1.93061	3.79e-10	4.9e-08	LOC123096495	NC_057805.1	100865497	100869772	-	2317	protein_coding	vacuolar-sorting receptor 1-like && sp|O22925|VSR2_ARATH Vacuolar-sorting receptor 2 OS=Arabidopsis thaliana OX=3702 GN=VSR2 PE=2 SV=1 && PF02225:PA domain	WRKY
123046595	1316.77	751.52	481.967	195.558	185.935	118.177	850.086	166.556	2.35189	3.94e-10	5.08e-08	LOC123046595	NC_057798.1	666457806	666460364	+	784	protein_coding	late embryogenesis abundant protein At5g17165-like && sp|F4KFM8|LEA65_ARATH Late embryogenesis abundant protein At5g17165 OS=Arabidopsis thaliana OX=3702 GN=At5g17165 PE=3 SV=1 && -	-
123168972	255.54	139.274	180.738	1270.62	649.279	665.917	191.851	861.939	-2.16851	4.18e-10	5.38e-08	LOC123168972	NC_057814.1	158417167	158418141	+	975	protein_coding	chlorophyll a-b binding protein of LHCII type 1-like && sp|P04784|CB21_WHEAT Chlorophyll a-b binding protein, chloroplastic OS=Triticum aestivum OX=4565 GN=WHAB1.6 PE=3 SV=1 && PF00504:Chlorophyll A-B binding protein	ERF
123132542	576.549	346.783	381.228	102.339	98.4359	142.563	434.854	114.446	1.92438	4.3e-10	5.52e-08	LOC123132542	NC_057809.1	146203792	146205638	-	1113	protein_coding	FCS-Like Zinc finger 12-like && sp|F4IE21|FLZ12_ARATH FCS-Like Zinc finger 12 OS=Arabidopsis thaliana OX=3702 GN=FLZ12 PE=1 SV=2 && PF04570:zinc-finger of the FCS-type, C2-C2	ERF
123072609	1617.72	1785.33	1492.32	642.403	688.057	704.371	1631.79	678.277	1.26649	4.32e-10	5.54e-08	LOC123072609	NC_057801.1	813638743	813646466	-	1901	protein_coding	protein DETOXIFICATION 40-like && sp|Q9LVD9|DTX40_ARATH Protein DETOXIFICATION 40 OS=Arabidopsis thaliana OX=3702 GN=DTX40 PE=1 SV=1 && PF01554:MatE	MYB_related
123076900	68.6368	26.1723	212.342	4.05302	3.97721	0.937911	102.384	2.98938	5.10936	4.37e-10	5.6e-08	LOC123076900	NC_057802.1	13967433	13976172	+	2179	protein_coding	metal tolerance protein 7-like%2C transcript variant X3 && sp|Q9LDU0|MTP7_ORYSJ Metal tolerance protein 7 OS=Oryza sativa subsp. japonica OX=39947 GN=MTP7 PE=2 SV=1 && PF01545:Cation efflux family|PF16916:Dimerisation domain of Zinc Transporter	Dof
123190477	4269.21	2621.91	4081.91	1238.2	1117.6	1320.58	3657.67	1225.46	1.5775	4.42e-10	5.65e-08	LOC123190477	NC_057797.1	715388526	715393780	-	2522	protein_coding	polyamine oxidase 3-like%2C transcript variant X3 && sp|Q7X809|PAO3_ORYSJ Polyamine oxidase 3 OS=Oryza sativa subsp. japonica OX=39947 GN=PAO3 PE=1 SV=2 && -	bHLH
123104363	1069.68	501.013	2003.92	84.1001	57.6695	232.602	1191.54	124.791	3.25413	4.47e-10	5.7e-08	LOC123104363	NC_057806.1	504370451	504376187	-	1946	protein_coding	beta-glucosidase 31-like && sp|B7F7K7|BGL31_ORYSJ Beta-glucosidase 31 OS=Oryza sativa subsp. japonica OX=39947 GN=BGLU31 PE=2 SV=1 && PF00232:Glycosyl hydrolase family 1	NAC
123049405	502.633	94.4073	438.511	40.5302	22.869	44.0818	345.184	35.827	3.26705	4.48e-10	5.71e-08	LOC123049405	NC_057794.1	338845366	338846327	-	962	protein_coding	probable glutathione S-transferase GSTU6 && sp|Q06398|GSTU6_ORYSJ Probable glutathione S-transferase GSTU6 OS=Oryza sativa subsp. japonica OX=39947 GN=GSTU6 PE=2 SV=2 && PF13410:Glutathione S-transferase, C-terminal domain|PF13417:Glutathione S-transferase, N-terminal domain	-
123078151	187.959	167.316	188.639	42.5567	57.6695	36.5785	181.305	45.6016	1.99229	4.57e-10	5.82e-08	LOC123078151	NC_057802.1	178355384	178357635	+	1434	protein_coding	peroxidase 1-like && sp|P37834|PER1_ORYSJ Peroxidase 1 OS=Oryza sativa subsp. japonica OX=39947 GN=PRX74 PE=2 SV=2 && PF00141:Peroxidase	NAC
123041662	60.1892	31.7807	66.1718	266.486	258.519	193.21	52.7139	239.405	-2.18581	4.59e-10	5.83e-08	LOC123041662	NC_057798.1	564710746	564711938	+	1083	protein_coding	putative GEM-like protein 8 && sp|Q9FMW4|GEML8_ARATH Putative GEM-like protein 8 OS=Arabidopsis thaliana OX=3702 GN=At5g23370 PE=3 SV=1 && PF02893:GRAM domain	MYB
123147928	929.237	1010.44	623.2	249.261	218.747	306.697	854.292	258.235	1.72571	4.63e-10	5.87e-08	LOC123147928	NC_057812.1	517519659	517523401	-	1440	protein_coding	probable cinnamyl alcohol dehydrogenase 5 && sp|Q0J6T3|CADH5_ORYSJ Probable cinnamyl alcohol dehydrogenase 5 OS=Oryza sativa subsp. japonica OX=39947 GN=CAD5 PE=3 SV=2 && PF08240:Alcohol dehydrogenase GroES-like domain|PF00107:Zinc-binding dehydrogenase	HB-other
123079699	596.612	770.214	587.645	2042.72	1513.33	1859.88	651.49	1805.31	-1.47014	4.66e-10	5.89e-08	LOC123079699	NC_057802.1	463876830	463879105	-	2276	protein_coding	uncharacterized LOC123079699 && - && -	WOX
123111350	59.1333	71.0392	40.4932	3.03976	0	1.87582	56.8885	1.63853	5.12087	4.66e-10	5.89e-08	LOC123111350	NC_057807.1	275538396	275540698	+	1298	protein_coding	WRKY transcription factor 22-like && sp|Q9SHB5|WRK55_ARATH WRKY transcription factor 55 OS=Arabidopsis thaliana OX=3702 GN=WRKY55 PE=2 SV=1 && PF03106:WRKY DNA -binding domain	WRKY
123077410	460.395	331.828	297.279	113.484	92.4701	110.674	363.167	105.543	1.78217	4.69e-10	5.91e-08	LOC123077410	NC_057802.1	60066045	60066907	-	863	protein_coding	monothiol glutaredoxin-S2-like && sp|Q5SMY5|GRXS2_ORYSJ Monothiol glutaredoxin-S2 OS=Oryza sativa subsp. japonica OX=39947 GN=GRXS2 PE=2 SV=1 && -	-
123069135	1353.73	1194.58	1069.61	207.717	250.564	457.701	1205.97	305.327	1.98099	4.72e-10	5.95e-08	LOC123069135	NC_057801.1	157125978	157128153	-	1132	protein_coding	protein PHLOEM PROTEIN 2-LIKE A1-like && sp|C0HJV2|LEC_LUFAC Lectin OS=Luffa acutangula OX=56866 PE=1 SV=1 && PF14299:Phloem protein 2	GRAS
123187890	957.748	549.619	501.72	140.842	206.815	152.88	669.696	166.846	2.00467	4.83e-10	6.08e-08	LOC123187890	NC_057797.1	118254797	118258110	-	1001	protein_coding	UMP-CMP kinase 3 && sp|Q6K7H2|KCY4_ORYSJ UMP-CMP kinase 4 OS=Oryza sativa subsp. japonica OX=39947 GN=Os02g0778400 PE=2 SV=1 && PF00406:Adenylate kinase	-
123088071	92.9237	67.3003	76.0481	287.764	322.154	226.037	78.7574	278.652	-1.82447	4.99e-10	6.26e-08	LOC123088071	NC_057803.1	677439212	677441896	+	1491	protein_coding	cysteine synthase-like && sp|P32260|CYSKP_SPIOL Cysteine synthase, chloroplastic/chromoplastic OS=Spinacia oleracea OX=3562 GN=CYSK PE=1 SV=2 && PF00291:Pyridoxal-phosphate dependent enzyme	GeBP
123097626	141.497	215.922	239.008	606.939	675.131	618.084	198.809	633.385	-1.6706	4.99e-10	6.26e-08	LOC123097626	NC_057805.1	312764278	312772043	+	2423	protein_coding	alpha-L-arabinofuranosidase 1-like%2C transcript variant X1 && sp|Q9SG80|ASD1_ARATH Alpha-L-arabinofuranosidase 1 OS=Arabidopsis thaliana OX=3702 GN=ASD1 PE=1 SV=1 && PF06964:Alpha-L-arabinofuranosidase C-terminal domain	GRAS
123151037	2461.42	2144.26	7765.8	650.509	627.405	720.316	4123.83	666.077	2.6302	5e-10	6.26e-08	LOC123151037	NC_057812.1	204902547	204907974	-	2012	protein_coding	carboxyl-terminal-processing peptidase 3%2C chloroplastic-like && sp|F4J3G5|CTPA3_ARATH Carboxyl-terminal-processing peptidase 3, chloroplastic OS=Arabidopsis thaliana OX=3702 GN=CTPA3 PE=3 SV=1 && PF03572:Peptidase family S41|PF17820:PDZ domain	HSF
123053616	53.8535	53.2794	239.008	0	0	1.87582	115.38	0.625274	7.47347	5.1e-10	6.37e-08	LOC123053616	NC_057794.1	416882999	416885178	+	2079	protein_coding	eukaryotic peptide chain release factor subunit 1-2-like && sp|P35614|ERF1Z_ARATH Eukaryotic peptide chain release factor subunit 1-3 OS=Arabidopsis thaliana OX=3702 GN=ERF1-3 PE=1 SV=1 && PF03464:eRF1 domain 2|PF03465:eRF1 domain 3|PF03463:eRF1 domain 1	SBP
123111526	52373.1	39699.7	33830.6	120241	123329	104173	41967.8	115914	-1.46571	5.25e-10	6.54e-08	LOC123111526	NC_057807.1	303212564	303213567	-	879	protein_coding	ribulose bisphosphate carboxylase small subunit%2C chloroplastic 3 && sp|Q40004|RBS_HORVU Ribulose bisphosphate carboxylase small subunit, chloroplastic OS=Hordeum vulgare OX=4513 GN=RBCS PE=2 SV=1 && PF00101:Ribulose bisphosphate carboxylase, small chain|PF12338:Ribulose-1,5-bisphosphate carboxylase small subunit	M-type_MADS
123040649	7.39166	8.41253	8.88874	115.511	97.4416	44.0818	8.23098	85.6781	-3.37685	5.3e-10	6.6e-08	LOC123040649	NC_057798.1	102839651	102841195	-	1545	protein_coding	protein ASPARTIC PROTEASE IN GUARD CELL 1-like && - && PF14543:Xylanase inhibitor N-terminal|PF14541:Xylanase inhibitor C-terminal	-
123071370	517.416	764.606	727.889	1960.65	1739.03	1822.36	669.97	1840.68	-1.45765	5.51e-10	6.85e-08	LOC123071370	NC_057801.1	631148447	631150703	+	2257	protein_coding	uncharacterized LOC123071370 && - && -	WOX
123168575	72.8606	71.0392	416.783	9.11929	8.94872	15.0066	186.894	11.0249	4.08055	5.62e-10	6.98e-08	LOC123168575	NC_057814.1	190869443	190876029	+	1369	pseudogene	- && sp|I6YGS0|EPHA_MYCTU Epoxide hydrolase A OS=Mycobacterium tuberculosis (strain ATCC 25618 / H37Rv) OX=83332 GN=ephA PE=1 SV=1 && PF00561:alpha/beta hydrolase fold	FAR1
123049298	61.2452	115.906	59.2583	1.01325	6.96012	8.4412	78.8032	5.47152	3.83832	5.66e-10	7.01e-08	LOC123049298	NC_057799.1	335985253	335990159	-	1143	protein_coding	transcription factor BHLH6-like && sp|Q2HIV9|BH035_ARATH Transcription factor bHLH35 OS=Arabidopsis thaliana OX=3702 GN=BHLH35 PE=2 SV=1 && PF00010:Helix-loop-helix DNA-binding domain	bHLH
123105975	270.323	195.358	154.072	588.701	731.806	740.95	206.584	687.152	-1.73495	5.73e-10	7.09e-08	LOC123105975	NC_057806.1	682786632	682789130	+	1743	protein_coding	MADS-box transcription factor 51-like%2C transcript variant X3 && sp|Q9XJ61|MAD51_ORYSJ MADS-box transcription factor 51 OS=Oryza sativa subsp. japonica OX=39947 GN=MADS51 PE=2 SV=1 && PF00319:SRF-type transcription factor (DNA-binding and dimerisation domain)	M-type_MADS
123044226	191.127	122.449	479.005	25.3314	26.8462	43.1439	264.194	31.7738	3.05365	5.8e-10	7.16e-08	LOC123044226	NC_057798.1	182683169	182685126	-	1468	protein_coding	protein STRICTOSIDINE SYNTHASE-LIKE 4-like && sp|B5X3B2|APMAP_SALSA Adipocyte plasma membrane-associated protein OS=Salmo salar OX=8030 GN=apmap PE=2 SV=1 && PF03088:Strictosidine synthase	MYB_related
123092288	372.751	553.358	448.388	1204.76	1244.87	1302.76	458.165	1250.79	-1.44831	5.86e-10	7.22e-08	LOC123092288	NC_057804.1	388359579	388373805	+	3084	protein_coding	alpha-L-arabinofuranosidase 1-like%2C transcript variant X1 && sp|Q9SG80|ASD1_ARATH Alpha-L-arabinofuranosidase 1 OS=Arabidopsis thaliana OX=3702 GN=ASD1 PE=1 SV=1 && -	C3H
123138142	712.767	716.935	923.442	291.817	297.296	293.566	784.381	294.227	1.41465	5.86e-10	7.22e-08	LOC123138142	NC_057810.1	580559454	580561414	-	1883	protein_coding	zinc finger protein CONSTANS-LIKE 16-like && sp|Q8RWD0|COL16_ARATH Zinc finger protein CONSTANS-LIKE 16 OS=Arabidopsis thaliana OX=3702 GN=COL16 PE=1 SV=2 && PF06203:CCT motif|PF00643:B-box zinc finger	CO-like
123093132	42.238	240.225	291.353	15.1988	16.9031	14.0687	191.272	15.3902	3.63682	6.07e-10	7.47e-08	LOC123093132	NC_057804.1	533848651	533859562	+	9738	lncRNA	uncharacterized LOC123093132 && sp|Q9MAX3|SUT12_ARATH Sulfate transporter 1.2 OS=Arabidopsis thaliana OX=3702 GN=SULTR1;2 PE=1 SV=1 && -	MIKC_MADS
778386	254.484	241.159	113.578	47.6229	22.869	23.4478	203.074	31.3132	2.69948	6.13e-10	7.52e-08	LOC778386	NC_057808.1	564471354	564475486	-	2261	protein_coding	beta-fructofuranosidase%2C insoluble isoenzyme 4%2C transcript variant X1 && sp|Q5JJV0|INV4_ORYSJ Beta-fructofuranosidase, insoluble isoenzyme 4 OS=Oryza sativa subsp. japonica OX=39947 GN=CIN4 PE=2 SV=1 && PF08244:Glycosyl hydrolases family 32 C terminal|PF00251:Glycosyl hydrolases family 32 N-terminal domain	-
100141381	628.291	94.4073	1775.77	0	2.98291	0.937911	832.824	1.30694	9.31517	6.32e-10	7.74e-08	LOC100141381	NC_057809.1	585428825	585429740	+	807	protein_coding	dehydrin WZY2 && sp|P12948|DHN3_HORVU Dehydrin DHN3 OS=Hordeum vulgare OX=4513 GN=DHN3 PE=2 SV=1 && PF00257:Dehydrin	-
123040757	894.39	526.251	856.282	237.101	104.402	177.265	758.975	172.923	2.13388	6.48e-10	7.92e-08	LOC123040757	NC_057794.1	133628463	133630469	-	2007	protein_coding	leucine-rich repeat extensin-like protein 4 && sp|Q9T0K5|LRX3_ARATH Leucine-rich repeat extensin-like protein 3 OS=Arabidopsis thaliana OX=3702 GN=LRX3 PE=1 SV=1 && PF13855:Leucine rich repeat	C3H
123165686	206.966	115.906	352.587	18.2386	45.7379	17.8203	225.153	27.2656	3.04672	6.48e-10	7.92e-08	LOC123165686	NC_057814.1	417995249	417996918	-	1113	protein_coding	pre-mRNA cleavage factor Im 25 kDa subunit 1-like%2C transcript variant X2 && sp|Q94AF0|CFIS1_ARATH Pre-mRNA cleavage factor Im 25 kDa subunit 1 OS=Arabidopsis thaliana OX=3702 GN=CFIS1 PE=1 SV=1 && PF13869:Nucleotide hydrolase	EIL
123039823	370.639	599.159	64.1965	0	0	0	344.665	0	10.899	6.82e-10	8.32e-08	LOC123039823	NC_057798.1	2916943	2932523	-	1667	protein_coding	tau-cadinol synthase-like && sp|Q5GJ59|TPS7_MAIZE Tau-cadinol synthase OS=Zea mays OX=4577 GN=TPS7 PE=1 SV=1 && PF03936:Terpene synthase family, metal binding domain|PF01397:Terpene synthase, N-terminal domain	GRAS
123148920	259.764	88.799	307.155	20.2651	35.7949	30.9511	218.573	29.0037	2.91224	6.95e-10	8.47e-08	LOC123148920	NC_057812.1	645618167	645621660	-	1283	protein_coding	non-specific lipid transfer protein GPI-anchored 9-like && - && PF14368:Probable lipid transfer	-
123103334	1153.1	1896.56	1498.25	4166.5	4194.96	4464.46	1515.97	4275.31	-1.49558	7.04e-10	8.56e-08	LOC123103334	NC_057795.1	9602107	9606834	+	3995	protein_coding	protein PHOTOSYSTEM I ASSEMBLY 2%2C chloroplastic-like && sp|A2Y3B5|GPA1_ORYSI Guanine nucleotide-binding protein alpha-1 subunit OS=Oryza sativa subsp. indica OX=39946 GN=GPA1 PE=2 SV=2 && -	-
123111239	259.764	429.039	347.649	1372.96	863.054	1346.84	345.484	1194.28	-1.78882	7.12e-10	8.65e-08	LOC123111239	NC_057807.1	255031443	255045264	-	2261	protein_coding	uncharacterized LOC123111239%2C transcript variant X5 && - && -	-
123050221	91.8677	192.554	116.541	28.3711	11.9316	14.0687	133.654	18.1238	2.88715	7.2e-10	8.73e-08	LOC123050221	NC_057799.1	591651419	591653013	-	1303	protein_coding	WRKY DNA-binding transcription factor 70-like && sp|K4BIZ9|WRK70_SOLLC WRKY DNA-binding transcription factor 70 OS=Solanum lycopersicum OX=4081 GN=WRKY70 PE=2 SV=1 && PF03106:WRKY DNA -binding domain	WRKY
123137891	1991.52	1339.46	3034.02	618.085	493.174	575.878	2121.67	562.379	1.91554	7.22e-10	8.73e-08	LOC123137891	NC_057810.1	541651667	541654755	+	1270	protein_coding	probable tocopherol O-methyltransferase%2C chloroplastic && sp|Q6ZIK0|GTOMC_ORYSJ Probable tocopherol O-methyltransferase, chloroplastic OS=Oryza sativa subsp. japonica OX=39947 GN=VTE4 PE=2 SV=1 && PF08241:Methyltransferase domain	-
543339	67.5809	57.953	77.0358	0	7.95442	0.937911	67.5232	2.96411	4.51571	7.33e-10	8.86e-08	LOC543339	NC_057808.1	51915529	51916719	+	956	protein_coding	germin-like protein 8-4 && sp|Q6ZCR3|GL812_ORYSJ Germin-like protein 8-12 OS=Oryza sativa subsp. japonica OX=39947 GN=Os08g0231400 PE=2 SV=1 && PF00190:Cupin	E2F/DP
123045377	1323.11	1035.68	835.542	359.705	370.875	376.102	1064.77	368.894	1.52904	7.36e-10	8.87e-08	LOC123045377	NC_057798.1	449588579	449590211	-	1313	protein_coding	uncharacterized LOC123045377 && sp|Q56XJ7|Y4276_ARATH Uncharacterized protein At4g22758 OS=Arabidopsis thaliana OX=3702 GN=At4g22758 PE=2 SV=1 && -	HSF
123074222	630.403	272.94	438.511	107.405	115.339	83.4741	447.285	102.073	2.13155	7.37e-10	8.87e-08	LOC123074222	NC_057802.1	90776895	90777794	-	900	protein_coding	embryo-specific protein ATS3A-like && - && PF06232:Embryo-specific protein 3, (ATS3)	-
123136589	805.691	704.783	856.282	311.069	247.581	319.828	788.919	292.826	1.42955	7.59e-10	9.13e-08	LOC123136589	NC_057810.1	206181172	206186505	-	2043	protein_coding	4-coumarate--CoA ligase 3-like && sp|Q6ETN3|4CL3_ORYSJ 4-coumarate--CoA ligase 3 OS=Oryza sativa subsp. japonica OX=39947 GN=4CL3 PE=1 SV=1 && PF00501:AMP-binding enzyme|PF13193:AMP-binding enzyme C-terminal domain	C2H2
123182213	172.12	133.666	82.9616	17.2253	25.8519	21.572	129.582	21.5497	2.58684	7.62e-10	9.15e-08	LOC123182213	NC_057794.1	578097456	578098192	-	737	protein_coding	oleosin G-like && sp|A6MGW7|OLE_LILLO Oleosin OS=Lilium longiflorum OX=4690 PE=1 SV=1 && PF01277:Oleosin	ERF
123094945	958.803	1009.5	725.914	2324.41	2194.43	2405.74	898.074	2308.19	-1.36184	7.75e-10	9.29e-08	LOC123094945	NC_057804.1	433188020	433189063	-	757	protein_coding	uncharacterized LOC123094945 && - && -	-
100037546	2552.23	1877.86	1763.92	763.994	778.539	780.342	2064.67	774.292	1.41482	7.99e-10	9.56e-08	LOC100037546	NC_057803.1	511502492	511506158	+	1851	protein_coding	protein disulfide-isomerase-like && sp|P52589|PDI_WHEAT Protein disulfide-isomerase OS=Triticum aestivum OX=4565 GN=PDI PE=2 SV=1 && PF00085:Thioredoxin|PF13848:Thioredoxin-like domain	MYB_related
123181822	178.456	129.927	1191.09	0	0.994302	0.937911	499.825	0.644071	9.58685	8.07e-10	9.65e-08	LOC123181822	NC_057796.1	328467344	328469614	+	2141	protein_coding	eukaryotic peptide chain release factor subunit 1-2-like && sp|Q9LPV8|ERF1Y_ARATH Eukaryotic peptide chain release factor subunit 1-2 OS=Arabidopsis thaliana OX=3702 GN=ERF1-2 PE=1 SV=1 && PF03464:eRF1 domain 2|PF03465:eRF1 domain 3|PF03463:eRF1 domain 1	SBP
123111103	2497.32	1630.16	2647.86	445.832	512.066	843.182	2258.45	600.36	1.91105	8.1e-10	9.66e-08	LOC123111103	NC_057795.1	118973011	118977795	+	1936	protein_coding	alanine aminotransferase 2%2C transcript variant X1 && sp|P52894|ALA2_HORVU Alanine aminotransferase 2 OS=Hordeum vulgare OX=4513 PE=1 SV=1 && PF00155:Aminotransferase class I and II	-
123052445	313.617	446.799	234.07	38.5037	69.6012	11.2549	331.496	39.7866	3.06138	8.11e-10	9.66e-08	LOC123052445	NC_057799.1	182581032	182585043	-	2827	protein_coding	probable mixed-linked glucan synthase 3 && sp|Q6ZF85|CSLF3_ORYSJ Probable mixed-linked glucan synthase 3 OS=Oryza sativa subsp. japonica OX=39947 GN=CSLF3 PE=3 SV=1 && PF03552:Cellulose synthase	LBD
123160779	44.3499	40.1932	127.405	0	2.98291	0.937911	70.6495	1.30694	5.75573	8.14e-10	9.69e-08	LOC123160779	NC_057794.1	499679575	499681091	-	1074	protein_coding	non-specific lipid transfer protein GPI-anchored 2-like%2C transcript variant X2 && sp|Q9LZH5|LTPG2_ARATH Non-specific lipid transfer protein GPI-anchored 2 OS=Arabidopsis thaliana OX=3702 GN=LTPG2 PE=2 SV=1 && PF14368:Probable lipid transfer	-
123127829	145.721	139.274	301.23	22.2916	29.8291	43.1439	195.408	31.7549	2.61876	8.2e-10	9.74e-08	LOC123127829	NC_057809.1	447125705	447127643	-	1939	protein_coding	ethylene-responsive transcription factor ERF054-like && sp|Q9SKT1|ERF53_ARATH Ethylene-responsive transcription factor ERF053 OS=Arabidopsis thaliana OX=3702 GN=ERF053 PE=1 SV=1 && PF00847:AP2 domain	ERF
123056765	297.778	70.1044	81.974	11.1458	12.9259	14.0687	149.952	12.7135	3.55745	8.49e-10	1.01e-07	LOC123056765	NC_057794.1	463235983	463238302	-	1592	protein_coding	phospholipase A1-II 7-like && sp|A2Y7R2|PLA7_ORYSI Phospholipase A1-II 7 OS=Oryza sativa subsp. indica OX=39946 GN=OsI_21081 PE=3 SV=1 && PF01764:Lipase (class 3)	Trihelix
123154669	103.483	138.339	186.664	24.3181	34.8006	21.572	142.829	26.8969	2.41071	9.03e-10	1.07e-07	LOC123154669	NC_057812.1	678882988	678883836	+	849	protein_coding	ethylene-responsive transcription factor RAP2-13-like && sp|Q9LM15|RA213_ARATH Ethylene-responsive transcription factor RAP2-13 OS=Arabidopsis thaliana OX=3702 GN=RAP2-13 PE=1 SV=1 && PF00847:AP2 domain	ERF
123190292	153.113	232.747	353.574	27.3579	34.8006	61.9022	246.478	41.3535	2.57283	9.04e-10	1.07e-07	LOC123190292	NC_057797.1	693168315	693169729	-	1415	protein_coding	ubiquinol oxidase 1b%2C mitochondrial-like && sp|O82766|AOX1B_ORYSJ Ubiquinol oxidase 1b, mitochondrial OS=Oryza sativa subsp. japonica OX=39947 GN=AOX1B PE=2 SV=1 && PF01786:Alternative oxidase	-
123049142	54.9095	121.514	64.1965	0	0.994302	0	80.2068	0.331434	7.83535	9.12e-10	1.08e-07	LOC123049142	NC_057799.1	181954173	181960298	-	3071	protein_coding	probable mixed-linked glucan synthase 8 && sp|Q84S18|CSLF8_ORYSJ Probable mixed-linked glucan synthase 8 OS=Oryza sativa subsp. japonica OX=39947 GN=CSFL8 PE=2 SV=1 && PF03552:Cellulose synthase	G2-like
123170534	325.233	290.7	321.97	69.9145	97.4416	113.487	312.634	93.6145	1.73809	9.29e-10	1.1e-07	LOC123170534	NC_057814.1	268356811	268359912	-	1722	protein_coding	monodehydroascorbate reductase 4%2C cytosolic && sp|Q6ZJ08|MDAR4_ORYSJ Monodehydroascorbate reductase 4, cytosolic OS=Oryza sativa subsp. japonica OX=39947 GN=MDAR4 PE=1 SV=1 && PF07992:Pyridine nucleotide-disulphide oxidoreductase	WRKY
123154515	58.0773	94.4073	143.208	15.1988	6.96012	11.2549	98.5641	11.138	3.14757	9.32e-10	1.1e-07	LOC123154515	NC_057812.1	199759698	199762096	-	2106	pseudogene	- && sp|W8JMU7|CYQ32_CATRO Cytochrome P450 81Q32 OS=Catharanthus roseus OX=4058 GN=CYP81Q32 PE=2 SV=1 && -	G2-like
123102909	242.869	308.46	735.79	46.6097	80.5385	79.7225	429.04	68.9569	2.63673	9.33e-10	1.1e-07	LOC123102909	NC_057806.1	254555251	254558535	-	1859	protein_coding	2-oxoisovalerate dehydrogenase subunit alpha 2%2C mitochondrial-like && sp|Q84JL2|ODBA2_ARATH 2-oxoisovalerate dehydrogenase subunit alpha 2, mitochondrial OS=Arabidopsis thaliana OX=3702 GN=At5g09300 PE=1 SV=1 && PF00676:Dehydrogenase E1 component	E2F/DP
123157477	263.988	180.402	254.811	72.9543	59.6581	46.8956	233.067	59.836	1.96266	9.4e-10	1.1e-07	LOC123157477	NC_057813.1	215878529	215881404	-	1576	protein_coding	cytochrome b561 and DOMON domain-containing protein At4g12980-like && sp|Q9SV71|B561O_ARATH Cytochrome b561 and DOMON domain-containing protein At4g12980 OS=Arabidopsis thaliana OX=3702 GN=At4g12980 PE=2 SV=1 && PF04526:Protein of unknown function (DUF568)|PF03188:Eukaryotic cytochrome b561	bZIP
123103520	324.177	368.282	345.673	100.312	79.5442	132.246	346.044	104.034	1.73289	9.57e-10	1.12e-07	LOC123103520	NC_057806.1	386343714	386345848	+	1479	protein_coding	transcription factor WRKY19-like && sp|Q0DFT7|WRK19_ORYSJ Transcription factor WRKY19 OS=Oryza sativa subsp. japonica OX=39947 GN=WRKY19 PE=2 SV=1 && PF03106:WRKY DNA -binding domain	WRKY
123113818	4205.85	2371.4	2713.04	10873.2	10479.9	8248.93	3096.76	9867.37	-1.672	9.64e-10	1.13e-07	LOC123113818	NC_057807.1	638570373	638571369	-	997	protein_coding	chlorophyll a-b binding protein of LHCII type 1-like && sp|P04784|CB21_WHEAT Chlorophyll a-b binding protein, chloroplastic OS=Triticum aestivum OX=4565 GN=WHAB1.6 PE=3 SV=1 && PF00504:Chlorophyll A-B binding protein	ERF
123137700	1257.64	1446.02	1230.6	578.568	524.992	544.927	1311.42	549.495	1.25509	1.01e-09	1.18e-07	LOC123137700	NC_057810.1	509319650	509322389	+	1886	protein_coding	S-adenosylmethionine synthase 2-like && sp|Q4LB23|METK2_HORVU S-adenosylmethionine synthase 2 OS=Hordeum vulgare OX=4513 GN=SAM2 PE=2 SV=1 && PF02773:S-adenosylmethionine synthetase, C-terminal domain|PF02772:S-adenosylmethionine synthetase, central domain|PF00438:S-adenosylmethionine synthetase, N-terminal domain	-
123053236	2193.21	945.943	2538.23	439.752	449.425	447.384	1892.46	445.52	2.08658	1.01e-09	1.18e-07	LOC123053236	NC_057794.1	404671878	404675655	+	1721	protein_coding	UDP-glucuronic acid decarboxylase 2-like && sp|Q9LZI2|UXS2_ARATH UDP-glucuronic acid decarboxylase 2 OS=Arabidopsis thaliana OX=3702 GN=UXS2 PE=1 SV=1 && PF16363:GDP-mannose 4,6 dehydratase	FAR1
123121276	68.6368	27.1071	139.257	1.01325	2.98291	4.68956	78.3336	2.89524	4.74422	1.02e-09	1.19e-07	LOC123121276	NC_057808.1	293923356	293924811	+	1456	protein_coding	probable protein phosphatase 2C 68 && sp|Q0J2L7|P2C68_ORYSJ Probable protein phosphatase 2C 68 OS=Oryza sativa subsp. japonica OX=39947 GN=Os09g0325700 PE=2 SV=2 && PF00481:Protein phosphatase 2C	NAC
123113028	14051.5	6029.92	15373.6	2499.7	2946.12	3179.52	11818.3	2875.11	2.0393	1.05e-09	1.22e-07	LOC123113028	NC_057807.1	538323914	538325468	-	1477	protein_coding	11S globulin seed storage protein 2-like && - && PF00190:Cupin	-
123073907	2.1119	2.80418	1.97528	44.5832	41.7607	68.4675	2.29712	51.6038	-4.48453	1.14e-09	1.32e-07	LOC123073907	NC_057802.1	28535583	28537835	-	1983	protein_coding	RNA exonuclease 4-like && sp|Q08237|REXO4_YEAST RNA exonuclease 4 OS=Saccharomyces cerevisiae (strain ATCC 204508 / S288c) OX=559292 GN=REX4 PE=1 SV=1 && -	C2H2
123156589	1723.31	1756.35	1804.42	515.746	623.428	800.976	1761.36	646.717	1.44518	1.14e-09	1.32e-07	LOC123156589	NC_057813.1	43135251	43139680	-	2158	lncRNA	uncharacterized LOC123156589%2C transcript variant X1 && - && -	-
123124492	57.0214	21.4987	74.0729	0	0	0	50.8643	0	8.13727	1.16e-09	1.34e-07	LOC123124492	NC_057808.1	134802491	134803415	+	925	protein_coding	uncharacterized LOC123124492 && - && -	-
123080262	601.892	877.708	1650.34	145.909	230.678	255.112	1043.31	210.566	2.30854	1.16e-09	1.35e-07	LOC123080262	NC_057802.1	530081641	530085094	+	1828	protein_coding	selenium-binding protein 1-like && sp|O23264|SEBP1_ARATH Selenium-binding protein 1 OS=Arabidopsis thaliana OX=3702 GN=SBP1 PE=1 SV=1 && PF05694:56kDa selenium binding protein (SBP56)	-
123134252	573.381	288.83	390.117	64.8483	76.5613	128.494	417.443	89.9678	2.21199	1.17e-09	1.35e-07	LOC123134252	NC_057810.1	475131537	475132433	+	897	protein_coding	uncharacterized LOC123134252 && - && PF04520:Senescence regulator	-
123071688	20.0631	23.3681	17.7775	104.365	86.5043	150.066	20.4029	113.645	-2.47701	1.23e-09	1.41e-07	LOC123071688	NC_057801.1	681368252	681370734	+	1719	protein_coding	extensin-1-like%2C transcript variant X1 && - && PF01190:Pollen proteins Ole e I like	-
123102066	28376.6	21438.9	16617	7663.24	8350.15	7034.34	22144.2	7682.58	1.52726	1.23e-09	1.42e-07	LOC123102066	NC_057806.1	21201562	21207328	-	2722	protein_coding	5-methyltetrahydropteroyltriglutamate--homocysteine methyltransferase 1-like && sp|Q2QLY5|METE1_ORYSJ 5-methyltetrahydropteroyltriglutamate--homocysteine methyltransferase 1 OS=Oryza sativa subsp. japonica OX=39947 GN=Os12g0623900 PE=2 SV=1 && PF08267:Cobalamin-independent synthase, N-terminal domain|PF01717:Cobalamin-independent synthase, Catalytic domain	-
123051907	270.323	243.963	227.157	607.953	715.898	604.953	247.148	642.934	-1.37961	1.24e-09	1.42e-07	LOC123051907	NC_057799.1	97121078	97124193	-	1102	lncRNA	uncharacterized LOC123051907 && sp|Q6AVI1|GIF1_ORYSJ GRF-interacting factor 1 OS=Oryza sativa subsp. japonica OX=39947 GN=GIF1 PE=1 SV=1 && -	-
123143139	31.6785	33.6501	38.5179	129.697	176.986	130.37	34.6155	145.684	-2.07256	1.25e-09	1.43e-07	LOC123143139	NC_057811.1	17749829	17754985	+	2511	protein_coding	uncharacterized LOC123143139 && - && PF04578:Protein of unknown function, DUF594|PF13968:Domain of unknown function (DUF4220)	TCP
123115661	112.987	33.6501	41.4808	375.917	297.296	494.279	62.7059	389.164	-2.63813	1.27e-09	1.45e-07	LOC123115661	NC_057807.1	56103747	56104366	+	620	protein_coding	glutaredoxin-C1-like && sp|Q7G8Y5|GRXC1_ORYSJ Glutaredoxin-C1 OS=Oryza sativa subsp. japonica OX=39947 GN=GRXC1 PE=3 SV=1 && PF00462:Glutaredoxin	-
123086830	502.633	644.026	431.598	117.537	19.886	80.6604	526.086	72.6946	2.85568	1.29e-09	1.48e-07	LOC123086830	NC_057803.1	543040563	543043474	-	1625	protein_coding	protein tas-like && sp|P0A9T4|TAS_ECOLI Protein tas OS=Escherichia coli (strain K12) OX=83333 GN=tas PE=1 SV=1 && PF00248:Aldo/keto reductase family	bHLH
123054629	6695.79	5540.12	6795.94	2592.92	2516.58	2943.17	6343.95	2684.22	1.24081	1.33e-09	1.51e-07	LOC123054629	NC_057799.1	575330519	575335803	-	2407	protein_coding	polyamine oxidase 3%2C transcript variant X1 && sp|Q7X809|PAO3_ORYSJ Polyamine oxidase 3 OS=Oryza sativa subsp. japonica OX=39947 GN=PAO3 PE=1 SV=2 && PF01593:Flavin containing amine oxidoreductase	bHLH
123183286	308.338	315.937	283.452	1383.09	880.952	743.764	302.576	1002.6	-1.72817	1.35e-09	1.54e-07	LOC123183286	NC_057796.1	484394292	484400545	+	3070	protein_coding	peroxisomal biogenesis factor 6-like && sp|Q6NW58|SPAST_DANRE Spastin OS=Danio rerio OX=7955 GN=spast PE=2 SV=2 && PF17862:AAA+ lid domain|PF00004:ATPase family associated with various cellular activities (AAA)	Trihelix
123128714	366.415	186.01	274.563	54.7157	78.5499	62.8401	275.663	65.3686	2.07529	1.38e-09	1.57e-07	LOC123128714	NC_057809.1	585163565	585169817	+	1913	protein_coding	protein DETOXIFICATION 19-like && sp|Q9LUH2|DTX19_ARATH Protein DETOXIFICATION 19 OS=Arabidopsis thaliana OX=3702 GN=DTX19 PE=2 SV=1 && PF01554:MatE	B3
123136622	762.397	296.308	1174.3	80.0471	143.18	133.183	744.336	118.803	2.64684	1.46e-09	1.66e-07	LOC123136622	NC_057810.1	211406315	211415599	-	2102	protein_coding	succinate-semialdehyde dehydrogenase%2C mitochondrial-like && sp|B9F3B6|SSDH_ORYSJ Succinate-semialdehyde dehydrogenase, mitochondrial OS=Oryza sativa subsp. japonica OX=39947 GN=ALDH5F1 PE=3 SV=1 && PF00171:Aldehyde dehydrogenase family	bHLH
123068293	96.0915	161.708	203.453	817.696	932.656	420.184	153.751	723.512	-2.23337	1.5e-09	1.7e-07	LOC123068293	NC_057801.1	16729521	16731203	+	1452	protein_coding	WAT1-related protein At3g18200-like && sp|Q9LV20|WTR17_ARATH WAT1-related protein At3g18200 OS=Arabidopsis thaliana OX=3702 GN=At3g18200 PE=2 SV=1 && PF00892:EamA-like transporter family	ERF
123095797	1208.01	1110.45	1809.35	441.779	503.117	439.88	1375.94	461.592	1.57575	1.51e-09	1.71e-07	LOC123095797	NC_057805.1	16302515	16308267	-	3090	protein_coding	probable linoleate 9S-lipoxygenase 4 && sp|Q53RB0|LOX4_ORYSJ Probable linoleate 9S-lipoxygenase 4 OS=Oryza sativa subsp. japonica OX=39947 GN=Os03g0700700 PE=2 SV=1 && PF01477:PLAT/LH2 domain|PF00305:Lipoxygenase	NF-YA
123186344	89.7558	72.9086	46.419	8.10603	4.97151	8.4412	69.6945	7.17292	3.27774	1.56e-09	1.77e-07	LOC123186344	NC_057797.1	741696505	741697144	+	640	protein_coding	uncharacterized LOC123186344 && - && -	-
123128159	1100.3	869.295	996.527	400.235	399.71	407.991	988.708	402.645	1.29579	1.57e-09	1.77e-07	LOC123128159	NC_057809.1	506043726	506049942	+	3280	protein_coding	heat shock 70 kDa protein 17-like && sp|F4JMJ1|HSP7R_ARATH Heat shock 70 kDa protein 17 OS=Arabidopsis thaliana OX=3702 GN=HSP70-17 PE=2 SV=1 && PF00012:Hsp70 protein	LBD
123148878	778.236	544.011	448.388	115.511	159.088	199.775	590.211	158.125	1.89904	1.58e-09	1.79e-07	LOC123148878	NC_057812.1	641122787	641138944	-	2688	protein_coding	glutathione synthetase%2C chloroplastic-like%2C transcript variant X1 && sp|O23732|GSHB_BRAJU Glutathione synthetase, chloroplastic OS=Brassica juncea OX=3707 GN=GSH2 PE=2 SV=1 && PF03917:Eukaryotic glutathione synthase, ATP binding domain|PF03199:Eukaryotic glutathione synthase	-
123145002	426.604	498.209	536.288	144.895	123.293	196.961	487.034	155.05	1.65056	1.62e-09	1.82e-07	LOC123145002	NC_057811.1	340146670	340150846	-	2462	protein_coding	uncharacterized LOC123145002%2C transcript variant X5 && sp|A2WSI7|RAN1_ORYSI GTP-binding nuclear protein Ran-1 OS=Oryza sativa subsp. indica OX=39946 GN=RAN1 PE=2 SV=2 && -	-
123087970	270.323	252.376	236.046	565.396	727.829	710.937	252.915	668.054	-1.40166	1.65e-09	1.86e-07	LOC123087970	NC_057803.1	665893824	665895277	+	938	protein_coding	dormancy-associated protein homolog 3-like && sp|Q8LD26|DRMH3_ARATH Dormancy-associated protein homolog 3 OS=Arabidopsis thaliana OX=3702 GN=At1g56220 PE=1 SV=1 && PF05564:Dormancy/auxin associated protein	Trihelix
123055182	881.719	830.037	1022.21	271.552	225.707	386.419	911.32	294.559	1.62879	1.68e-09	1.89e-07	LOC123055182	NC_057799.1	633598837	633600716	-	1792	protein_coding	chaperone protein dnaJ C76%2C chloroplastic-like && sp|Q9FMX6|DJC76_ARATH Chaperone protein dnaJ C76, chloroplastic OS=Arabidopsis thaliana OX=3702 GN=DJC76 PE=2 SV=1 && PF13370:4Fe-4S single cluster domain of Ferredoxin I|PF00226:DnaJ domain	-
123169275	333.681	160.773	904.677	55.729	63.6353	51.5851	466.377	56.9832	3.03302	1.69e-09	1.89e-07	LOC123169275	NC_057814.1	565962261	565963560	+	1266	pseudogene	- && sp|Q8LC95|ENL3_ARATH Early nodulin-like protein 3 OS=Arabidopsis thaliana OX=3702 GN=At5g25090 PE=2 SV=2 && -	NF-YB
123061990	6066.44	3978.19	6775.2	1099.38	2011.47	826.3	5606.61	1312.38	2.09499	1.7e-09	1.9e-07	LOC123061990	NC_057800.1	520878084	520880814	-	2023	protein_coding	BURP domain-containing protein 3-like && sp|Q942D4|BURP3_ORYSJ BURP domain-containing protein 3 OS=Oryza sativa subsp. japonica OX=39947 GN=BURP3 PE=2 SV=1 && PF03181:BURP domain	-
123112109	158.393	74.7781	109.628	593.767	348.006	479.273	114.266	473.682	-2.05362	1.81e-09	2.02e-07	LOC123112109	NC_057807.1	403432535	403435826	+	1462	protein_coding	protein SRG1-like%2C transcript variant X1 && sp|Q94LP4|ODD11_ORYSJ 2-oxoglutarate-dependent dioxygenase 11 OS=Oryza sativa subsp. japonica OX=39947 GN=2ODD11 PE=1 SV=1 && PF03171:2OG-Fe(II) oxygenase superfamily|PF14226:non-haem dioxygenase in morphine synthesis N-terminal	STAT
123111848	2985.17	4298.8	3172.29	1376	1362.19	1338.4	3485.42	1358.86	1.35903	1.83e-09	2.04e-07	LOC123111848	NC_057807.1	358801390	358806104	-	2962	protein_coding	potassium transporter 23-like && sp|Q6H4R6|HAK23_ORYSJ Potassium transporter 23 OS=Oryza sativa subsp. japonica OX=39947 GN=HAK23 PE=2 SV=1 && PF02705:K+ potassium transporter	C3H
123069776	4.2238	20.564	3.95055	80.0471	111.362	130.37	9.57944	107.26	-3.46831	1.88e-09	2.1e-07	LOC123069776	NC_057794.1	581953651	581956010	-	2012	protein_coding	glucan endo-1%2C3-beta-glucosidase 13-like && sp|Q94CD8|E134_ARATH Glucan endo-1,3-beta-glucosidase 4 OS=Arabidopsis thaliana OX=3702 GN=At3g13560 PE=2 SV=1 && PF07983:X8 domain|PF00332:Glycosyl hydrolases family 17	ERF
123098050	3705.33	2361.12	3968.33	1050.74	956.519	1289.63	3344.93	1098.96	1.60568	1.95e-09	2.17e-07	LOC123098050	NC_057805.1	380388883	380392976	+	1675	protein_coding	uncharacterized LOC123098050 && - && -	-
123120215	154.169	77.5823	333.822	19.2518	15.9088	29.0753	188.524	21.412	3.1357	1.98e-09	2.2e-07	LOC123120215	NC_057808.1	220328963	220333237	+	2136	protein_coding	purple acid phosphatase 22-like%2C transcript variant X1 && sp|Q8S340|PPA22_ARATH Purple acid phosphatase 22 OS=Arabidopsis thaliana OX=3702 GN=PAP22 PE=2 SV=1 && PF16656:Purple acid Phosphatase, N-terminal domain|PF14008:Iron/zinc purple acid phosphatase-like protein C|PF00149:Calcineurin-like phosphoesterase	C3H
123103278	340.016	227.138	304.193	101.325	77.5556	71.2813	290.449	83.3874	1.80078	2.05e-09	2.27e-07	LOC123103278	NC_057806.1	340692377	340693954	-	1578	protein_coding	transcription factor MYB44-like && sp|O23160|MYB73_ARATH Transcription factor MYB73 OS=Arabidopsis thaliana OX=3702 GN=MYB73 PE=1 SV=1 && PF13921:Myb-like DNA-binding domain	MYB
123123028	208.022	157.969	181.725	52.6892	52.698	51.5851	182.572	52.3241	1.80229	2.07e-09	2.29e-07	LOC123123028	NC_057795.1	342863013	342866048	+	1242	protein_coding	calcium uniporter protein 2%2C mitochondrial-like && sp|O64823|MCU2_ARATH Calcium uniporter protein 2, mitochondrial OS=Arabidopsis thaliana OX=3702 GN=At2g23790 PE=2 SV=1 && PF04678:Mitochondrial calcium uniporter	GRAS
123128610	151.001	90.6684	218.268	17.2253	5.96581	29.0753	153.312	17.4221	3.13237	2.1e-09	2.32e-07	LOC123128610	NC_057809.1	573151863	573154570	-	1749	protein_coding	serine/threonine-protein kinase RIPK-like && sp|Q9ZUF4|RIPK_ARATH Serine/threonine-protein kinase RIPK OS=Arabidopsis thaliana OX=3702 GN=RIPK PE=1 SV=1 && PF07714:Protein tyrosine kinase	Trihelix
123122133	347.408	166.381	253.823	64.8483	47.7265	63.778	255.871	58.7843	2.12071	2.1e-09	2.32e-07	LOC123122133	NC_057808.1	401529626	401535484	-	2284	protein_coding	beta-glucosidase 31-like%2C transcript variant X1 && sp|B7F7K7|BGL31_ORYSJ Beta-glucosidase 31 OS=Oryza sativa subsp. japonica OX=39947 GN=BGLU31 PE=2 SV=1 && PF00232:Glycosyl hydrolase family 1	NAC
123138923	3512.09	1361.9	6457.18	6.07953	39.7721	0.937911	3777.06	15.5965	7.92086	2.1e-09	2.32e-07	LOC123138923	NC_057810.1	666813863	666814800	+	827	protein_coding	dehydrin DHN3-like && sp|P12948|DHN3_HORVU Dehydrin DHN3 OS=Hordeum vulgare OX=4513 GN=DHN3 PE=2 SV=1 && PF00257:Dehydrin	-
123063075	144.665	234.616	208.392	619.098	591.61	544.927	195.891	585.212	-1.57748	2.12e-09	2.33e-07	LOC123063075	NC_057800.1	666160478	666168215	-	4109	pseudogene	- && sp|C0LGH3|Y5614_ARATH Probable LRR receptor-like serine/threonine-protein kinase At1g56140 OS=Arabidopsis thaliana OX=3702 GN=At1g56140 PE=2 SV=2 && PF11721:Malectin domain|PF13855:Leucine rich repeat	ERF
123182881	1256.58	613.18	632.088	5492.85	2503.65	3365.23	833.95	3787.24	-2.18339	2.14e-09	2.35e-07	LOC123182881	NC_057796.1	454775256	454776406	-	1151	protein_coding	chlorophyll a-b binding protein of LHCII type 1-like && sp|P04784|CB21_WHEAT Chlorophyll a-b binding protein, chloroplastic OS=Triticum aestivum OX=4565 GN=WHAB1.6 PE=3 SV=1 && PF00504:Chlorophyll A-B binding protein	ERF
123087122	209.078	83.1906	57.283	4.05302	4.97151	15.9445	116.517	8.32301	3.79581	2.14e-09	2.36e-07	LOC123087122	NC_057803.1	580194369	580195496	+	725	protein_coding	chemocyanin-like && sp|P60496|BABL_LILLO Chemocyanin OS=Lilium longiflorum OX=4690 PE=1 SV=1 && PF02298:Plastocyanin-like domain	MYB
123171290	593.444	239.29	576.781	100.312	59.6581	114.425	469.838	91.4652	2.35989	2.16e-09	2.37e-07	LOC123171290	NC_057796.1	403104585	403105651	-	1067	protein_coding	protein LURP-one-related 8-like && sp|Q9ZVI6|LOR8_ARATH Protein LURP-one-related 8 OS=Arabidopsis thaliana OX=3702 GN=At2g38640 PE=2 SV=1 && PF04525:LURP-one-related	AP2
123167789	78.1404	86.9295	382.216	0	0	0	182.429	0	9.98112	2.16e-09	2.37e-07	LOC123167789	NC_057814.1	389534915	389536877	+	1963	protein_coding	purine-uracil permease NCS1-like && sp|Q9LZD0|NCS1_ARATH Purine-uracil permease NCS1 OS=Arabidopsis thaliana OX=3702 GN=NCS1 PE=1 SV=1 && PF02133:Permease for cytosine/purines, uracil, thiamine, allantoin	-
123186219	8.44761	14.9556	0	119.564	68.6069	173.514	7.80107	120.561	-3.94311	2.18e-09	2.39e-07	LOC123186219	NC_057797.1	723549111	723550005	+	807	protein_coding	phylloplanin-like && - && -	-
123055362	565.99	367.347	477.029	129.697	51.7037	127.556	470.122	102.985	2.18991	2.2e-09	2.4e-07	LOC123055362	NC_057799.1	647957778	647959703	-	1699	protein_coding	uncharacterized LOC123055362 && - && -	-
123120023	90.8118	72.9086	92.838	326.268	227.695	288.877	85.5195	280.947	-1.717	2.2e-09	2.4e-07	LOC123120023	NC_057808.1	190864892	190867736	-	2209	protein_coding	amino acid permease 6-like%2C transcript variant X1 && sp|P92934|AAP6_ARATH Amino acid permease 6 OS=Arabidopsis thaliana OX=3702 GN=AAP6 PE=1 SV=1 && PF01490:Transmembrane amino acid transporter protein	MYB_related
123156316	636.738	474.841	559.003	130.71	197.866	204.465	556.861	177.68	1.6471	2.2e-09	2.4e-07	LOC123156316	NC_057813.1	181948687	181955553	-	2392	protein_coding	probable amino-acid acetyltransferase NAGS2%2C chloroplastic && sp|B5X4Z4|NAGS2_ARATH Probable amino-acid acetyltransferase NAGS2, chloroplastic OS=Arabidopsis thaliana OX=3702 GN=NAGS2 PE=1 SV=1 && PF00583:Acetyltransferase (GNAT) family|PF00696:Amino acid kinase family	MYB_related
123077759	874.327	359.869	614.311	170.227	148.151	133.183	616.169	150.52	2.03321	2.22e-09	2.41e-07	LOC123077759	NC_057802.1	114587615	114588718	+	975	protein_coding	heme-binding protein 2-like && - && PF04832:SOUL heme-binding protein	-
543428	2481.48	1088.02	5685.83	270.539	600.559	386.419	3085.11	419.172	2.87967	2.23e-09	2.42e-07	LOC543428	NC_057813.1	170873141	170876159	-	1451	protein_coding	formate dehydrogenase%2C mitochondrial && sp|Q9ZRI8|FDH_HORVU Formate dehydrogenase, mitochondrial OS=Hordeum vulgare OX=4513 PE=2 SV=1 && PF00389:D-isomer specific 2-hydroxyacid dehydrogenase, catalytic domain|PF02826:D-isomer specific 2-hydroxyacid dehydrogenase, NAD binding domain	bHLH
123057209	304.114	169.185	213.33	61.8085	58.6638	55.3368	228.876	58.603	1.96487	2.25e-09	2.45e-07	LOC123057209	NC_057794.1	466969157	466970488	+	1167	protein_coding	uncharacterized LOC123057209 && - && PF06749:Protein of unknown function (DUF1218)	B3
novel.1172	181.624	170.12	216.293	469.137	546.866	504.596	189.345	506.866	-1.42077	2.27e-09	2.46e-07	-	NC_057800.1	745614640	745619164	-	2631	-	- && sp|Q9SQI8|ODP24_ARATH Dihydrolipoyllysine-residue acetyltransferase component 4 of pyruvate dehydrogenase complex, chloroplastic OS=Arabidopsis thaliana OX=3702 GN=LTA2 PE=1 SV=1 && -	-
123112381	550.15	287.896	569.867	29.3844	41.7607	122.866	469.304	64.6705	2.85648	2.28e-09	2.47e-07	LOC123112381	NC_057807.1	448471742	448472908	+	956	protein_coding	skin secretory protein xP2-like && - && -	-
123113747	196.407	156.099	251.848	49.6495	32.812	58.1505	201.451	46.8706	2.10205	2.3e-09	2.48e-07	LOC123113747	NC_057795.1	164467692	164472852	-	1760	protein_coding	GDSL esterase/lipase At1g09390-like && sp|O80522|GDL2_ARATH GDSL esterase/lipase At1g09390 OS=Arabidopsis thaliana OX=3702 GN=At1g09390 PE=2 SV=1 && PF00657:GDSL-like Lipase/Acylhydrolase	ERF
123044142	1047.5	632.809	494.807	207.717	203.832	139.749	725.04	183.766	1.98039	2.32e-09	2.5e-07	LOC123044142	NC_057798.1	170593634	170597841	-	1502	protein_coding	UMP-CMP kinase 3%2C transcript variant X2 && sp|Q7XI40|KCY3_ORYSJ UMP-CMP kinase 3 OS=Oryza sativa subsp. japonica OX=39947 GN=URA6 PE=2 SV=1 && PF00406:Adenylate kinase	-
123119447	65.469	75.7128	84.9369	340.453	286.359	199.775	75.3729	275.529	-1.86878	2.32e-09	2.5e-07	LOC123119447	NC_057808.1	59432010	59435077	-	1682	protein_coding	probable glucan 1%2C3-beta-glucosidase A && sp|P0C2S3|GUNC_HUNTH Endoglucanase C OS=Hungateiclostridium thermocellum OX=1515 GN=celC PE=1 SV=1 && PF00150:Cellulase (glycosyl hydrolase family 5)	-
123078648	97.1475	88.799	93.8256	15.1988	13.9202	22.5099	93.2574	17.2096	2.43387	2.39e-09	2.57e-07	LOC123078648	NC_057802.1	321327758	321331157	+	1907	protein_coding	AAA-ATPase At3g50940-like && sp|Q147F9|AATPC_ARATH AAA-ATPase At3g50940 OS=Arabidopsis thaliana OX=3702 GN=At3g50940 PE=2 SV=1 && PF00004:ATPase family associated with various cellular activities (AAA)|PF14363:Domain associated at C-terminal with AAA	NAC
123111722	49.6297	21.4987	200.491	2.02651	0	2.81373	90.5397	1.61341	5.79875	2.42e-09	2.6e-07	LOC123111722	NC_057807.1	334504557	334505991	+	1435	protein_coding	probable protein phosphatase 2C 68 && sp|Q0J2L7|P2C68_ORYSJ Probable protein phosphatase 2C 68 OS=Oryza sativa subsp. japonica OX=39947 GN=Os09g0325700 PE=2 SV=2 && PF00481:Protein phosphatase 2C	NAC
123176968	0	5.60836	7.90111	119.564	44.7436	70.3434	4.50315	78.217	-4.09921	2.44e-09	2.62e-07	LOC123176968	NC_057796.1	476612135	476613313	+	697	protein_coding	protein RADIALIS-like 3 && sp|Q6NNN0|RADL3_ARATH Protein RADIALIS-like 3 OS=Arabidopsis thaliana OX=3702 GN=RL3 PE=2 SV=1 && -	MYB_related
123141547	531.143	200.031	200.491	43.5699	63.6353	53.4609	310.555	53.5554	2.53467	2.45e-09	2.63e-07	LOC123141547	NC_057811.1	323463049	323463948	-	900	protein_coding	uncharacterized LOC123141547 && - && PF04520:Senescence regulator	-
123190330	1630.39	429.039	2256.75	137.803	172.014	282.311	1438.73	197.376	2.86524	2.51e-09	2.69e-07	LOC123190330	NC_057794.1	64035661	64037029	+	1061	protein_coding	probable glutathione S-transferase GSTF1 && sp|O65857|GSTF1_ORYSJ Probable glutathione S-transferase GSTF1 OS=Oryza sativa subsp. japonica OX=39947 GN=GSTF1 PE=1 SV=2 && PF00043:Glutathione S-transferase, C-terminal domain|PF02798:Glutathione S-transferase, N-terminal domain	CAMTA
123113980	658.913	309.394	140.245	37.4904	50.7094	61.9022	369.517	50.034	2.88317	2.52e-09	2.7e-07	LOC123113980	NC_057807.1	660510588	660511495	+	797	protein_coding	actin-depolymerizing factor 3-like && sp|Q84TB6|ADF3_ORYSJ Actin-depolymerizing factor 3 OS=Oryza sativa subsp. japonica OX=39947 GN=ADF3 PE=1 SV=1 && PF00241:Cofilin/tropomyosin-type actin-binding protein	bHLH
123127932	2351.6	2062.01	1961.45	939.287	964.473	873.195	2125.02	925.652	1.19893	2.56e-09	2.74e-07	LOC123127932	NC_057809.1	462296828	462299648	-	1943	protein_coding	S-adenosylmethionine synthase 2 && sp|Q4LB23|METK2_HORVU S-adenosylmethionine synthase 2 OS=Hordeum vulgare OX=4513 GN=SAM2 PE=2 SV=1 && PF02773:S-adenosylmethionine synthetase, C-terminal domain|PF00438:S-adenosylmethionine synthetase, N-terminal domain|PF02772:S-adenosylmethionine synthetase, central domain	-
123110172	8929.12	7551.65	6355.45	2837.11	2900.38	3393.36	7612.07	3043.62	1.32245	2.73e-09	2.91e-07	LOC123110172	NC_057807.1	21412313	21418096	-	2746	protein_coding	5-methyltetrahydropteroyltriglutamate--homocysteine methyltransferase 1-like && sp|Q2QLY5|METE1_ORYSJ 5-methyltetrahydropteroyltriglutamate--homocysteine methyltransferase 1 OS=Oryza sativa subsp. japonica OX=39947 GN=Os12g0623900 PE=2 SV=1 && PF01717:Cobalamin-independent synthase, Catalytic domain|PF08267:Cobalamin-independent synthase, N-terminal domain	-
123127708	1413.92	601.029	668.631	115.511	190.906	241.043	894.526	182.487	2.29243	2.76e-09	2.94e-07	LOC123127708	NC_057809.1	417589189	417590748	+	1560	protein_coding	uncharacterized LOC123127708 && - && PF04520:Senescence regulator	-
100859946	266.1	164.512	164.936	530.945	701.977	955.732	198.516	729.551	-1.87903	2.77e-09	2.95e-07	LOC100859946	NC_057802.1	542421215	542455691	-	1074	protein_coding	MADS-box transcription factor 51 && sp|Q9XJ61|MAD51_ORYSJ MADS-box transcription factor 51 OS=Oryza sativa subsp. japonica OX=39947 GN=MADS51 PE=2 SV=1 && PF00319:SRF-type transcription factor (DNA-binding and dimerisation domain)	MIKC_MADS
123175009	220.694	360.804	272.588	912.942	784.505	790.659	284.695	829.369	-1.54154	2.85e-09	3.03e-07	LOC123175009	NW_025229334.1	18280	21156	-	2877	pseudogene	- && - && -	-
123043064	775.068	389.781	540.238	109.431	105.396	190.396	568.362	135.075	2.07159	2.86e-09	3.03e-07	LOC123043064	NC_057794.1	195577649	195582857	+	809	protein_coding	probable calcium-binding protein CML18 && sp|Q0DJV6|CML18_ORYSJ Probable calcium-binding protein CML18 OS=Oryza sativa subsp. japonica OX=39947 GN=CML18 PE=2 SV=1 && PF13499:EF-hand domain pair	HSF
123156484	1206.95	1397.42	1769.85	3960.81	3819.12	3418.69	1458.07	3732.87	-1.35612	2.88e-09	3.05e-07	LOC123156484	NC_057813.1	448119137	448126384	-	3282	protein_coding	phosphoenolpyruvate carboxylase 1-like && sp|P29195|CAPP1_SORBI Phosphoenolpyruvate carboxylase 1 OS=Sorghum bicolor OX=4558 GN=PEPC PE=2 SV=1 && PF00311:Phosphoenolpyruvate carboxylase	-
123096135	280.883	142.078	152.096	558.303	802.402	849.748	191.686	736.818	-1.94412	2.92e-09	3.08e-07	LOC123096135	NC_057805.1	52124640	52126444	-	1043	protein_coding	LOB domain-containing protein 39-like && sp|Q9FN11|LBD37_ARATH LOB domain-containing protein 37 OS=Arabidopsis thaliana OX=3702 GN=LBD37 PE=2 SV=1 && PF03195:Lateral organ boundaries (LOB) domain	LBD
123045639	2234.39	1298.33	1247.39	490.415	477.265	530.858	1593.37	499.513	1.67323	2.92e-09	3.08e-07	LOC123045639	NC_057798.1	493304683	493305646	+	876	protein_coding	PLAT domain-containing protein 3-like && sp|O65660|PLAT1_ARATH PLAT domain-containing protein 1 OS=Arabidopsis thaliana OX=3702 GN=PLAT1 PE=1 SV=1 && PF01477:PLAT/LH2 domain	-
123111652	767.676	626.266	620.237	267.499	225.707	275.746	671.393	256.317	1.38882	2.92e-09	3.08e-07	LOC123111652	NC_057807.1	324634417	324638770	-	1611	protein_coding	phosphoenolpyruvate/phosphate translocator 1%2C chloroplastic-like && sp|Q69VR7|PPT1_ORYSJ Phosphoenolpyruvate/phosphate translocator 1, chloroplastic OS=Oryza sativa subsp. japonica OX=39947 GN=PPT1 PE=2 SV=1 && PF03151:Triose-phosphate Transporter family	HB-other
123145655	329.457	72.9086	461.227	20.2651	18.8917	44.0818	287.864	27.7462	3.37197	3.01e-09	3.17e-07	LOC123145655	NC_057811.1	436092177	436095596	-	3064	protein_coding	nitrate reductase [NAD(P)H]-like && sp|P27968|NIA7_HORVU Nitrate reductase [NAD(P)H] OS=Hordeum vulgare OX=4513 GN=NAR-7 PE=2 SV=1 && PF00173:Cytochrome b5-like Heme/Steroid binding domain|PF00174:Oxidoreductase molybdopterin binding domain|PF00970:Oxidoreductase FAD-binding domain|PF00175:Oxidoreductase NAD-binding domain|PF03404:Mo-co oxidoreductase dimerisation domain	C3H
123181004	118.267	110.298	360.488	8.10603	28.8348	2.81373	196.351	13.2515	3.89319	3.05e-09	3.21e-07	LOC123181004	NC_057796.1	206583056	206590294	-	2235	protein_coding	very-long-chain aldehyde decarbonylase GL1-5-like && sp|B8BHF1|GLO15_ORYSI Very-long-chain aldehyde decarbonylase GL1-5 OS=Oryza sativa subsp. indica OX=39946 GN=GL1-5 PE=2 SV=1 && PF12076:WAX2 C-terminal domain|PF04116:Fatty acid hydroxylase superfamily	FAR1
123182459	10.5595	20.564	31.6044	168.2	107.385	114.425	20.9093	130.003	-2.63139	3.08e-09	3.24e-07	LOC123182459	NC_057796.1	409286754	409288857	-	1901	protein_coding	polygalacturonase At1g48100-like && sp|Q949Z1|PGLR4_ARATH Polygalacturonase At1g48100 OS=Arabidopsis thaliana OX=3702 GN=At1g48100 PE=2 SV=1 && PF00295:Glycosyl hydrolases family 28	C3H
123094003	404.429	900.141	571.843	1941.4	2161.61	3221.73	625.471	2441.58	-1.9644	3.1e-09	3.25e-07	LOC123094003	NC_057804.1	662526593	662528849	-	1445	protein_coding	metacaspase-1-like && sp|Q7XJE6|MCA1_ARATH Metacaspase-1 OS=Arabidopsis thaliana OX=3702 GN=AMC1 PE=1 SV=1 && PF00656:Caspase domain	LBD
123185195	276.659	135.535	238.021	6.07953	38.7778	32.8269	216.738	25.8947	3.06212	3.13e-09	3.28e-07	LOC123185195	NC_057797.1	218754976	218755954	+	979	protein_coding	uncharacterized LOC123185195 && - && PF04520:Senescence regulator	-
123167458	250.26	56.0836	334.809	18.2386	17.8974	29.0753	213.718	21.7371	3.2949	3.21e-09	3.35e-07	LOC123167458	NC_057814.1	557122129	557124837	-	878	protein_coding	non-specific lipid transfer protein GPI-anchored 9-like && - && PF14368:Probable lipid transfer	-
123169398	123.546	156.099	69.1347	12.1591	9.94302	24.3857	116.26	15.4959	2.90214	3.24e-09	3.38e-07	LOC123169398	NC_057814.1	606182674	606184131	+	1347	protein_coding	WRKY transcription factor WRKY28-like && sp|Q6IEL0|WRK71_ORYSI WRKY transcription factor WRKY71 OS=Oryza sativa subsp. indica OX=39946 GN=WRKY71 PE=1 SV=1 && PF03106:WRKY DNA -binding domain	WRKY
123086747	309.394	274.809	173.824	31.4109	76.5613	43.1439	252.676	50.372	2.32648	3.26e-09	3.4e-07	LOC123086747	NC_057803.1	533265228	533273367	+	1699	protein_coding	serine carboxypeptidase-like 19 && sp|Q8VZU3|SCP19_ARATH Serine carboxypeptidase-like 19 OS=Arabidopsis thaliana OX=3702 GN=SCPL19 PE=1 SV=1 && PF00450:Serine carboxypeptidase	C3H
123164287	15942.7	17577.5	17086.1	8432.3	7438.38	7583.95	16868.8	7818.21	1.10946	3.41e-09	3.54e-07	LOC123164287	NC_057814.1	208666815	208669874	-	1675	protein_coding	serine--glyoxylate aminotransferase-like && sp|Q56YA5|SGAT_ARATH Serine--glyoxylate aminotransferase OS=Arabidopsis thaliana OX=3702 GN=AGT1 PE=1 SV=2 && PF00266:Aminotransferase class-V	-
123131816	2.1119	4.67363	7.90111	77.0073	58.6638	45.0197	4.89555	60.2303	-3.61062	3.41e-09	3.54e-07	LOC123131816	NC_057809.1	31121835	31124396	+	2443	protein_coding	wall-associated receptor kinase 2-like && sp|Q9LMP1|WAK2_ARATH Wall-associated receptor kinase 2 OS=Arabidopsis thaliana OX=3702 GN=WAK2 PE=1 SV=1 && PF00069:Protein kinase domain|PF13947:Wall-associated receptor kinase galacturonan-binding	WRKY
123121961	162.616	436.517	350.612	73.9676	65.624	40.3302	316.582	59.9739	2.40235	3.45e-09	3.58e-07	LOC123121961	NC_057808.1	382408345	382412999	+	2323	protein_coding	3-hydroxy-3-methylglutaryl-coenzyme A reductase 3-like && sp|O24594|HMDH_MAIZE 3-hydroxy-3-methylglutaryl-coenzyme A reductase OS=Zea mays OX=4577 GN=HMGR PE=3 SV=1 && -	HSF
123100277	59.1333	819.755	698.26	10.1325	7.95442	5.62747	525.716	7.90481	6.05713	3.47e-09	3.6e-07	LOC123100277	NC_057805.1	451490221	451493462	-	1349	protein_coding	protein SULFUR DEFICIENCY-INDUCED 2-like && sp|Q8L730|SDI2_ARATH Protein SULFUR DEFICIENCY-INDUCED 2 OS=Arabidopsis thaliana OX=3702 GN=At1g04770 PE=2 SV=1 && -	-
123077841	850.041	150.491	1139.73	94.2326	89.4872	45.9577	713.422	76.5592	3.2207	3.53e-09	3.65e-07	LOC123077841	NC_057802.1	127872871	127873685	-	815	protein_coding	late embryogenesis abundant protein Lea14-A-like && sp|P46518|LEA14_GOSHI Late embryogenesis abundant protein Lea14-A OS=Gossypium hirsutum OX=3635 GN=LEA14-A PE=2 SV=1 && PF03168:Late embryogenesis abundant protein	NAC
123160071	2.1119	3.7389	1.97528	56.7422	47.7265	39.3923	2.60869	47.9537	-4.18726	3.6e-09	3.72e-07	LOC123160071	NC_057813.1	416085530	416086964	-	1346	protein_coding	peroxidase 47-like && sp|Q9SZB9|PER47_ARATH Peroxidase 47 OS=Arabidopsis thaliana OX=3702 GN=PER47 PE=2 SV=2 && PF00141:Peroxidase	NAC
123135655	4045.35	2841.57	2128.36	8719.05	8925.85	9296.58	3005.09	8980.49	-1.57947	3.64e-09	3.76e-07	LOC123135655	NC_057795.1	511697217	511700027	-	1111	protein_coding	uncharacterized LOC123135655%2C transcript variant X1 && - && -	-
123114869	0	2.80418	1.97528	74.9808	57.6695	30.0132	1.59315	54.2212	-5.04975	3.65e-09	3.76e-07	LOC123114869	NC_057807.1	457500564	457510598	+	1273	protein_coding	uncharacterized LOC123114869 && - && PF03108:MuDR family transposase	-
123180783	138.33	88.799	180.738	33.4374	17.8974	17.8203	135.955	23.0517	2.56251	3.65e-09	3.76e-07	LOC123180783	NC_057796.1	143743086	143744301	-	1216	protein_coding	NDR1/HIN1-like protein 13 && - && PF03168:Late embryogenesis abundant protein	G2-like
542871	531.143	400.063	561.966	117.537	197.866	128.494	497.724	147.966	1.75002	3.68e-09	3.78e-07	LOC542871	NW_025240898.1	531	1291	+	761	protein_coding	non-specific lipid-transfer protein Cw18 && sp|Q43871|NLTP8_HORVU Non-specific lipid-transfer protein Cw18 OS=Hordeum vulgare OX=4513 GN=CW18 PE=1 SV=1 && PF00234:Protease inhibitor/seed storage/LTP family	ARF
123044494	1095.02	494.47	529.374	111.458	212.781	126.618	706.288	150.286	2.23231	3.75e-09	3.85e-07	LOC123044494	NC_057798.1	225407077	225408675	+	1497	protein_coding	remorin 4.1-like && sp|Q7XII4|REM41_ORYSJ Remorin 4.1 OS=Oryza sativa subsp. japonica OX=39947 GN=REM4.1 PE=1 SV=1 && -	-
123190524	731.774	404.736	710.112	140.842	192.895	194.148	615.541	175.962	1.80585	3.82e-09	3.92e-07	LOC123190524	NC_057794.1	68165416	68166556	-	980	protein_coding	hydrophobic protein LTI6B && sp|A2Y075|LTI6B_ORYSI Hydrophobic protein LTI6B OS=Oryza sativa subsp. indica OX=39946 GN=LTI6B PE=3 SV=2 && -	-
123053499	3001.01	1235.71	1608.86	373.891	547.861	522.417	1948.53	481.389	2.01684	3.83e-09	3.92e-07	LOC123053499	NC_057799.1	413211975	413213083	+	1010	protein_coding	PLAT domain-containing protein 3-like && sp|Q9SIE7|PLAT2_ARATH PLAT domain-containing protein 2 OS=Arabidopsis thaliana OX=3702 GN=PLAT2 PE=2 SV=1 && PF01477:PLAT/LH2 domain	-
123060558	2848.96	1829.26	1233.56	340.453	548.855	579.629	1970.59	489.646	2.00853	3.85e-09	3.93e-07	LOC123060558	NC_057800.1	109305790	109306923	-	950	protein_coding	cold and drought-regulated protein CORA-like && - && -	-
123145546	157.337	122.449	191.602	33.4374	31.8177	45.9577	157.129	37.0709	2.08114	3.87e-09	3.96e-07	LOC123145546	NC_057811.1	423678855	423682507	-	2274	protein_coding	endoglucanase 7-like && sp|Q6Z5P2|GUN7_ORYSJ Endoglucanase 7 OS=Oryza sativa subsp. japonica OX=39947 GN=GLU10 PE=2 SV=1 && PF00759:Glycosyl hydrolase family 9	WRKY
123145716	307.282	352.392	560.979	123.617	120.311	99.4186	406.884	114.449	1.8306	3.88e-09	3.96e-07	LOC123145716	NC_057811.1	444077543	444078711	+	1059	protein_coding	allene oxide cyclase%2C chloroplastic-like && sp|A2XID3|AOC_ORYSI Allene oxide cyclase, chloroplastic OS=Oryza sativa subsp. indica OX=39946 GN=AOC PE=2 SV=1 && PF06351:Allene oxide cyclase	-
123043399	2558.57	2157.35	1479.48	7543.68	5028.19	6477.22	2065.13	6349.69	-1.62051	3.89e-09	3.96e-07	LOC123043399	NC_057798.1	50580106	50581727	-	895	protein_coding	ribulose bisphosphate carboxylase small subunit%2C chloroplastic 2-like && sp|P26667|RBS2_WHEAT Ribulose bisphosphate carboxylase small subunit, chloroplastic 2 OS=Triticum aestivum OX=4565 GN=RBCS2 PE=3 SV=1 && PF12338:Ribulose-1,5-bisphosphate carboxylase small subunit|PF00101:Ribulose bisphosphate carboxylase, small chain	M-type_MADS
novel.89	112.987	112.167	83.9492	465.084	399.71	254.174	103.034	372.989	-1.85569	3.89e-09	3.96e-07	-	NC_057794.1	520440379	520443198	+	2643	-	- && - && -	B3
123080180	537.479	429.974	530.362	1168.28	1272.71	1152.69	499.272	1197.89	-1.26294	3.92e-09	3.98e-07	LOC123080180	NC_057802.1	522830218	522834258	+	1648	protein_coding	BTB/POZ and TAZ domain-containing protein 2-like && sp|Q94BN0|BT2_ARATH BTB/POZ and TAZ domain-containing protein 2 OS=Arabidopsis thaliana OX=3702 GN=BT2 PE=1 SV=1 && PF02135:TAZ zinc finger|PF00651:BTB/POZ domain	C2H2
123071983	44.3499	29.9112	46.419	170.227	159.088	140.687	40.2267	156.667	-1.96393	3.95e-09	4.01e-07	LOC123071983	NC_057801.1	719243426	719246857	+	2882	protein_coding	uncharacterized LOC123071983%2C transcript variant X4 && - && -	-
123098411	165.784	83.1906	69.1347	7.09278	11.9316	18.7582	106.037	12.5942	3.06637	3.99e-09	4.04e-07	LOC123098411	NC_057805.1	434818024	434821784	-	1721	protein_coding	aminotransferase ALD1 homolog && sp|Q6VMN7|ALD1_ORYSJ Aminotransferase ALD1 homolog OS=Oryza sativa subsp. japonica OX=39947 GN=ALD1 PE=2 SV=1 && PF00155:Aminotransferase class I and II	-
123144134	741.278	319.676	1395.53	105.378	140.197	161.321	818.829	135.632	2.59338	4.06e-09	4.11e-07	LOC123144134	NC_057811.1	137112846	137122778	-	2072	protein_coding	succinate-semialdehyde dehydrogenase%2C mitochondrial && sp|B9F3B6|SSDH_ORYSJ Succinate-semialdehyde dehydrogenase, mitochondrial OS=Oryza sativa subsp. japonica OX=39947 GN=ALDH5F1 PE=3 SV=1 && PF00171:Aldehyde dehydrogenase family	bHLH
543067	94006	89624.3	63627.6	36138.7	26910.8	24803.1	82419.3	29284.2	1.49286	4.13e-09	4.18e-07	LOC543067	NC_057796.1	454988793	454994194	-	2439	protein_coding	phosphomethylethanolamine N-methyltransferase%2C transcript variant X2 && sp|Q944H0|PEAM2_ARATH Phosphomethylethanolamine N-methyltransferase OS=Arabidopsis thaliana OX=3702 GN=NMT2 PE=1 SV=2 && PF13489:Methyltransferase domain|PF08241:Methyltransferase domain	-
123093378	71.8047	26.1723	102.714	3.03976	3.97721	4.68956	66.8971	3.90218	4.09432	4.16e-09	4.2e-07	LOC123093378	NC_057804.1	579675966	579677500	-	1535	pseudogene	- && - && -	NF-YC
123062501	142.553	72.9086	591.595	2.02651	0.994302	0	269.019	1.00694	8.08154	4.23e-09	4.26e-07	LOC123062501	NC_057800.1	600729050	600730539	-	992	protein_coding	ATP-dependent Clp protease adapter protein CLPS2%2C chloroplastic-like && - && PF02617:ATP-dependent Clp protease adaptor protein ClpS	-
123080444	60.1892	19.6292	10.864	191.505	235.65	263.553	30.2275	230.236	-2.93639	4.29e-09	4.32e-07	LOC123080444	NC_057802.1	554719675	554720354	-	680	protein_coding	flowering-promoting factor 1-like protein 2 && sp|Q9LGE3|FLP1_ORYSJ Flowering-promoting factor 1-like protein 1 OS=Oryza sativa subsp. japonica OX=39947 GN=RAA1 PE=1 SV=1 && -	-
123092890	104.539	23.3681	347.649	8.10603	8.94872	6.56538	158.519	7.87338	4.33268	4.3e-09	4.33e-07	LOC123092890	NC_057804.1	490938599	490941251	+	1861	protein_coding	branched-chain-amino-acid aminotransferase 2%2C chloroplastic-like && sp|Q9M401|BCAT3_ARATH Branched-chain-amino-acid aminotransferase 3, chloroplastic OS=Arabidopsis thaliana OX=3702 GN=BCAT3 PE=1 SV=1 && PF01063:Amino-transferase class IV	MYB_related
123071433	4898.56	2724.73	1776.76	916.995	679.108	568.374	3133.35	721.493	2.11869	4.42e-09	4.44e-07	LOC123071433	NC_057801.1	643310022	643316359	-	2889	protein_coding	alpha-glucan phosphorylase%2C H isozyme-like && sp|Q9LKJ3|PHSH_WHEAT Alpha-glucan phosphorylase, H isozyme OS=Triticum aestivum OX=4565 PE=2 SV=1 && PF00343:Carbohydrate phosphorylase	GeBP
123148247	127.77	49.5405	107.653	9.11929	13.9202	13.1308	94.9877	12.0568	2.97451	4.47e-09	4.49e-07	LOC123148247	NC_057812.1	560826669	560827945	-	1277	protein_coding	heavy metal-associated isoprenylated plant protein 26-like && sp|Q9SZN7|HIP26_ARATH Heavy metal-associated isoprenylated plant protein 26 OS=Arabidopsis thaliana OX=3702 GN=HIPP26 PE=1 SV=1 && -	MIKC_MADS
123063492	5.27975	11.2167	12.8393	95.2459	91.4758	52.523	9.77859	79.7482	-3.01881	4.58e-09	4.59e-07	LOC123063492	NC_057800.1	722011882	722015619	+	3648	protein_coding	probably inactive leucine-rich repeat receptor-like protein kinase At3g28040 && sp|Q9LRT1|Y3804_ARATH Probably inactive leucine-rich repeat receptor-like protein kinase At3g28040 OS=Arabidopsis thaliana OX=3702 GN=At3g28040 PE=1 SV=1 && PF08263:Leucine rich repeat N-terminal domain|PF13855:Leucine rich repeat|PF00069:Protein kinase domain	CO-like
123129199	499.465	132.731	299.254	0	1.9886	7.50329	310.483	3.16397	6.60289	4.64e-09	4.64e-07	LOC123129199	NC_057809.1	619988509	619989354	+	725	lncRNA	uncharacterized LOC123129199 && - && -	C3H
123170543	106.651	152.36	185.676	14.1856	39.7721	20.6341	148.229	24.8639	2.57645	4.66e-09	4.65e-07	LOC123170543	NC_057796.1	386308437	386309240	+	804	protein_coding	uncharacterized LOC123170543 && - && -	-
123137321	17.9512	13.0862	7.90111	105.378	98.4359	62.8401	12.9795	88.8848	-2.77966	4.72e-09	4.71e-07	LOC123137321	NC_057810.1	422029352	422032126	+	2321	protein_coding	BTB/POZ domain-containing protein At1g67900-like && sp|Q9C9V6|Y1790_ARATH BTB/POZ domain-containing protein At1g67900 OS=Arabidopsis thaliana OX=3702 GN=At1g67900 PE=1 SV=1 && PF03000:NPH3 family	MYB
123061068	84.4761	224.334	396.043	20.2651	28.8348	39.3923	234.951	29.4974	2.99219	4.8e-09	4.78e-07	LOC123061068	NC_057800.1	228014822	228018817	+	2970	pseudogene	- && sp|Q9F234|AGL2_BACTQ Alpha-glucosidase 2 OS=Bacillus thermoamyloliquefaciens OX=1425 PE=3 SV=1 && -	FAR1
123163979	5194.22	2547.13	4812.76	1217.93	1186.2	1410.62	4184.7	1271.58	1.71839	4.84e-09	4.82e-07	LOC123163979	NC_057814.1	433265993	433271181	+	1212	protein_coding	reticulon-like protein B2 && sp|Q9SUT9|RTNLB_ARATH Reticulon-like protein B2 OS=Arabidopsis thaliana OX=3702 GN=RTNLB2 PE=1 SV=1 && PF02453:Reticulon	Dof
123187034	183.735	161.708	128.393	37.4904	21.8747	45.0197	157.945	34.7949	2.18025	5.02e-09	4.99e-07	LOC123187034	NC_057794.1	17404326	17406317	+	1992	protein_coding	xylan glycosyltransferase MUCI21-like && sp|Q9SS43|MUC21_ARATH Xylan glycosyltransferase MUCI21 OS=Arabidopsis thaliana OX=3702 GN=MUCI21 PE=1 SV=1 && PF04577:Protein of unknown function (DUF563)	C2H2
123099115	35.9023	4.67363	13.8269	180.359	151.134	136.935	18.1343	156.143	-3.11829	5.08e-09	5.04e-07	LOC123099115	NC_057805.1	507156447	507157106	+	660	protein_coding	lipid transfer protein EARLI 1-like%2C transcript variant X1 && sp|Q39176|ERLI1_ARATH Lipid transfer protein EARLI 1 OS=Arabidopsis thaliana OX=3702 GN=EARLI1 PE=1 SV=1 && PF14547:Hydrophobic seed protein	Trihelix
123135422	1639.89	2227.45	2439.47	7108.99	4612.57	6390.93	2102.27	6037.5	-1.52192	5.13e-09	5.08e-07	LOC123135422	NC_057810.1	18140730	18146595	+	3122	protein_coding	nitrate reductase [NADH]-like && sp|P27967|NIA1_HORVU Nitrate reductase [NADH] OS=Hordeum vulgare OX=4513 PE=3 SV=1 && PF00174:Oxidoreductase molybdopterin binding domain|PF00173:Cytochrome b5-like Heme/Steroid binding domain|PF00175:Oxidoreductase NAD-binding domain|PF03404:Mo-co oxidoreductase dimerisation domain|PF00970:Oxidoreductase FAD-binding domain	C3H
123109243	149.945	44.8668	300.242	8.10603	13.9202	19.6961	165.018	13.9075	3.56469	5.35e-09	5.29e-07	LOC123109243	NC_057794.1	152919078	152919894	+	817	protein_coding	uncharacterized LOC123109243 && - && PF10604:Polyketide cyclase / dehydrase and lipid transport	-
123168668	331.569	348.653	349.624	86.1266	97.4416	142.563	343.282	108.71	1.65743	5.71e-09	5.65e-07	LOC123168668	NC_057814.1	451713962	451716573	+	1157	protein_coding	GTP-binding nuclear protein Ran-3 && sp|A2YEQ6|RAN3_ORYSI GTP-binding nuclear protein Ran-3 OS=Oryza sativa subsp. indica OX=39946 GN=RAN3 PE=2 SV=2 && PF00071:Ras family	TALE
123136614	30.6226	23.3681	19.7528	136.789	90.4815	123.804	24.5812	117.025	-2.25422	5.72e-09	5.65e-07	LOC123136614	NC_057810.1	210604566	210606828	-	1857	protein_coding	probable cation transporter HKT6 && sp|Q6H501|HKT6_ORYSJ Probable cation transporter HKT6 OS=Oryza sativa subsp. japonica OX=39947 GN=HKT6 PE=2 SV=2 && PF02386:Cation transport protein	-
123125059	2.1119	23.3681	16.7898	114.498	130.254	127.556	14.09	124.102	-3.12579	5.75e-09	5.67e-07	LOC123125059	NC_057808.1	388880581	388881944	-	694	protein_coding	protein RADIALIS-like 3 && sp|Q6NNN0|RADL3_ARATH Protein RADIALIS-like 3 OS=Arabidopsis thaliana OX=3702 GN=RL3 PE=2 SV=1 && -	MYB_related
123143192	4644.07	3959.5	4087.83	2046.77	1854.37	1873.95	4230.47	1925.03	1.13592	5.81e-09	5.72e-07	LOC123143192	NC_057811.1	25208164	25212059	-	2408	protein_coding	luminal-binding protein 2 && sp|P24067|BIP2_MAIZE Luminal-binding protein 2 OS=Zea mays OX=4577 GN=BIPE2 PE=1 SV=3 && PF00012:Hsp70 protein	GATA
123090954	122.49	131.796	207.404	455.964	512.066	474.583	153.897	480.871	-1.64337	6e-09	5.9e-07	LOC123090954	NC_057804.1	53561238	53562538	-	1135	protein_coding	glutathione S-transferase 2%2C transcript variant X1 && sp|P30111|GSTF2_WHEAT Glutathione S-transferase 2 OS=Triticum aestivum OX=4565 GN=GSTA2 PE=3 SV=1 && PF02798:Glutathione S-transferase, N-terminal domain|PF00043:Glutathione S-transferase, C-terminal domain	CAMTA
123062941	4.2238	3.7389	1.97528	68.9013	42.755	40.3302	3.31266	50.6622	-3.93733	6.12e-09	6.01e-07	LOC123062941	NC_057800.1	650631176	650635163	-	1644	protein_coding	gibberellin 20 oxidase 2-like && sp|P0C5H5|GAOX2_ORYSI Gibberellin 20 oxidase 2 OS=Oryza sativa subsp. indica OX=39946 GN=20ox2 PE=1 SV=1 && PF03171:2OG-Fe(II) oxygenase superfamily|PF14226:non-haem dioxygenase in morphine synthesis N-terminal	WRKY
123106867	35.9023	68.235	52.3448	1.01325	1.9886	0	52.1607	1.00062	5.72971	6.13e-09	6.01e-07	LOC123106867	NC_057806.1	323547553	323549686	+	1302	protein_coding	probable WRKY transcription factor 47 && sp|Q9SHB5|WRK55_ARATH WRKY transcription factor 55 OS=Arabidopsis thaliana OX=3702 GN=WRKY55 PE=2 SV=1 && PF03106:WRKY DNA -binding domain	WRKY
123084698	1982.02	2378.88	2135.27	4790.67	4882.02	4533.86	2165.39	4735.52	-1.1288	6.15e-09	6.02e-07	LOC123084698	NC_057803.1	3851439	3860030	-	3526	protein_coding	phosphoinositide phosphatase SAC2-like && sp|Q94A27|SAC2_ARATH Phosphoinositide phosphatase SAC2 OS=Arabidopsis thaliana OX=3702 GN=SAC2 PE=2 SV=1 && PF02383:SacI homology domain	MYB
123119800	664.193	299.112	542.213	142.869	130.254	131.308	501.84	134.81	1.89585	6.3e-09	6.16e-07	LOC123119800	NC_057808.1	119222061	119222852	-	792	protein_coding	rapid alkalinization factor-like && sp|Q9LUS7|RLF23_ARATH Rapid alkalinization factor 23 OS=Arabidopsis thaliana OX=3702 GN=RALF23 PE=1 SV=1 && PF05498:Rapid ALkalinization Factor (RALF)	HSF
123103336	63063.5	51946.5	43240.8	141016	143237	115159	52750.2	133137	-1.33567	6.33e-09	6.19e-07	LOC123103336	NC_057806.1	354356714	354357899	+	975	protein_coding	ribulose bisphosphate carboxylase small subunit%2C chloroplastic 3 && sp|Q40004|RBS_HORVU Ribulose bisphosphate carboxylase small subunit, chloroplastic OS=Hordeum vulgare OX=4513 GN=RBCS PE=2 SV=1 && PF00101:Ribulose bisphosphate carboxylase, small chain|PF12338:Ribulose-1,5-bisphosphate carboxylase small subunit	M-type_MADS
123143423	997.874	454.277	415.796	2712.48	2122.84	2515.48	622.649	2450.27	-1.97695	6.73e-09	6.57e-07	LOC123143423	NC_057795.1	629356998	629358112	+	1115	protein_coding	chlorophyll a-b binding protein of LHCII type 1-like && sp|P04784|CB21_WHEAT Chlorophyll a-b binding protein, chloroplastic OS=Triticum aestivum OX=4565 GN=WHAB1.6 PE=3 SV=1 && PF00504:Chlorophyll A-B binding protein	ERF
123080435	604.004	843.123	700.236	1867.43	1667.44	1717.32	715.787	1750.73	-1.28996	6.82e-09	6.65e-07	LOC123080435	NC_057802.1	552739087	552744696	-	3467	protein_coding	uncharacterized LOC123080435 && sp|Q68CP4|HGNAT_HUMAN Heparan-alpha-glucosaminide N-acetyltransferase OS=Homo sapiens OX=9606 GN=HGSNAT PE=1 SV=2 && -	HD-ZIP
123150422	224.918	305.655	197.528	36.4772	50.7094	80.6604	242.7	55.949	2.11477	6.87e-09	6.69e-07	LOC123150422	NC_057812.1	194086669	194088479	-	1811	protein_coding	uncharacterized LOC123150422 && - && -	-
novel.2030	24.2869	23.3681	39.5055	101.325	148.151	169.762	29.0535	139.746	-2.26657	6.9e-09	6.71e-07	-	NC_057806.1	633259689	633260581	+	578	-	- && - && -	-
123165904	93.9796	39.2585	89.8751	2.02651	10.9373	2.81373	74.3711	5.25919	3.82408	7.05e-09	6.85e-07	LOC123165904	NC_057814.1	438390351	438391636	+	1188	protein_coding	late embryogenesis abundant protein 31-like && sp|Q9LJ97|LEA31_ARATH Late embryogenesis abundant protein 31 OS=Arabidopsis thaliana OX=3702 GN=RAB28 PE=1 SV=1 && PF04927:Seed maturation protein	-
123085250	322.065	217.791	205.429	78.0206	71.5898	49.7093	248.428	66.4399	1.90352	7.11e-09	6.9e-07	LOC123085250	NC_057803.1	76908014	76910896	-	1683	protein_coding	glucan endo-1%2C3-beta-glucosidase 7-like && sp|Q9M069|E137_ARATH Glucan endo-1,3-beta-glucosidase 7 OS=Arabidopsis thaliana OX=3702 GN=At4g34480 PE=1 SV=2 && PF00332:Glycosyl hydrolases family 17	BES1
123143589	276.659	118.71	104.69	1147	631.382	677.172	166.686	818.519	-2.29729	7.12e-09	6.9e-07	LOC123143589	NC_057811.1	69708537	69709509	+	973	pseudogene	- && sp|P04784|CB21_WHEAT Chlorophyll a-b binding protein, chloroplastic OS=Triticum aestivum OX=4565 GN=WHAB1.6 PE=3 SV=1 && PF00504:Chlorophyll A-B binding protein	ERF
123076914	987.314	776.757	470.116	3116.77	2975.95	1918.97	744.729	2670.56	-1.84248	7.18e-09	6.94e-07	LOC123076914	NC_057802.1	15359042	15360464	+	1423	protein_coding	receptor-like protein 6 && sp|O49879|CF0_SOLLC Receptor-like protein Cf-9 homolog OS=Solanum lycopersicum OX=4081 GN=HCR9-0 PE=2 SV=2 && PF08263:Leucine rich repeat N-terminal domain	MYB_related
123070761	28.5107	33.6501	31.6044	155.028	149.145	98.4807	31.2551	134.218	-2.1002	7.19e-09	6.95e-07	LOC123070761	NC_057801.1	535688642	535690702	-	2061	protein_coding	putative disease resistance protein RGA3 && - && PF18052:Rx N-terminal domain	GRAS
123085416	513.192	297.243	445.425	130.71	117.328	141.625	418.62	129.887	1.68749	7.2e-09	6.95e-07	LOC123085416	NC_057803.1	102606724	102610664	-	1105	transcribed_pseudogene	tropinone reductase homolog At5g06060-like && sp|Q9LHT0|TRNHF_ARATH Tropinone reductase homolog At5g06060 OS=Arabidopsis thaliana OX=3702 GN=At5g06060 PE=2 SV=1 && PF13561:Enoyl-(Acyl carrier protein) reductase	C2H2
123099210	99.2594	67.3003	235.058	19.2518	16.9031	15.0066	133.873	17.0539	2.97371	7.41e-09	7.14e-07	LOC123099210	NC_057805.1	512983862	512986790	-	1688	protein_coding	uncharacterized LOC123099210 && - && -	-
123182125	100.315	39.2585	250.86	4.05302	11.9316	12.1928	130.145	9.3925	3.78823	7.48e-09	7.2e-07	LOC123182125	NC_057796.1	367307554	367310297	-	1791	protein_coding	protein NRT1/ PTR FAMILY 5.10-like && sp|Q0WP01|PTR9_ARATH Protein NRT1/ PTR FAMILY 5.10 OS=Arabidopsis thaliana OX=3702 GN=NPF5.10 PE=2 SV=1 && PF00854:POT family	MYB_related
123044106	361.135	300.982	107.653	19.2518	32.812	55.3368	256.59	35.8002	2.83835	7.59e-09	7.3e-07	LOC123044106	NC_057798.1	165041675	165042712	-	1038	protein_coding	probable calcium-binding protein CML46 && - && -	Dof
123121756	236.533	133.666	236.046	55.729	45.7379	50.6472	202.081	50.7047	1.99405	7.72e-09	7.42e-07	LOC123121756	NC_057808.1	359166521	359168474	+	1954	protein_coding	probable carboxylesterase 2 && sp|Q9SX78|CXE2_ARATH Probable carboxylesterase 2 OS=Arabidopsis thaliana OX=3702 GN=CXE2 PE=2 SV=1 && PF07859:alpha/beta hydrolase fold	MYB_related
123114105	143.609	148.621	115.554	368.825	440.476	341.4	135.928	383.567	-1.4964	7.96e-09	7.63e-07	LOC123114105	NC_057807.1	674467594	674470057	+	2360	protein_coding	uncharacterized LOC123114105 && - && -	-
123151620	41.1821	29.9112	18.7651	122.604	140.197	145.376	29.9528	136.059	-2.18718	8.03e-09	7.69e-07	LOC123151620	NC_057812.1	511952510	511953566	+	846	protein_coding	heavy metal-associated isoprenylated plant protein 28-like && sp|F4IC29|HIP28_ARATH Heavy metal-associated isoprenylated plant protein 28 OS=Arabidopsis thaliana OX=3702 GN=HIPP28 PE=3 SV=1 && PF00403:Heavy-metal-associated domain	MIKC_MADS
123072701	3.16785	0	0	36.4772	52.698	73.1571	1.05595	54.1108	-5.75627	8.12e-09	7.77e-07	LOC123072701	NC_057801.1	827047107	827048360	+	1254	protein_coding	cationic peroxidase SPC4-like && sp|P84516|PER1_SORBI Cationic peroxidase SPC4 OS=Sorghum bicolor OX=4558 GN=Sb03g046810 PE=1 SV=2 && PF00141:Peroxidase	NAC
123080409	1062.29	1001.09	1059.74	504.601	375.846	377.04	1041.04	419.162	1.31269	8.14e-09	7.77e-07	LOC123080409	NC_057802.1	550268790	550274601	+	1942	protein_coding	serine carboxypeptidase 1-like && sp|P07519|CBP1_HORVU Serine carboxypeptidase 1 OS=Hordeum vulgare OX=4513 GN=CBP1 PE=1 SV=4 && PF00450:Serine carboxypeptidase	NAC
123062750	146.777	237.42	250.86	50.6627	41.7607	65.6538	211.686	52.6924	2.00561	8.23e-09	7.84e-07	LOC123062750	NC_057800.1	632649404	632654013	+	1833	protein_coding	protein NRT1/ PTR FAMILY 5.10-like && sp|Q0WP01|PTR9_ARATH Protein NRT1/ PTR FAMILY 5.10 OS=Arabidopsis thaliana OX=3702 GN=NPF5.10 PE=2 SV=1 && PF00854:POT family	MYB_related
123110802	812.026	411.279	625.175	187.452	165.054	201.651	616.16	184.719	1.7373	8.23e-09	7.84e-07	LOC123110802	NC_057807.1	133015648	133016421	-	774	protein_coding	rapid alkalinization factor-like && sp|Q9LUS7|RLF23_ARATH Rapid alkalinization factor 23 OS=Arabidopsis thaliana OX=3702 GN=RALF23 PE=1 SV=1 && PF05498:Rapid ALkalinization Factor (RALF)	HSF
123141617	170.008	97.2115	141.232	12.1591	24.8576	33.7648	136.151	23.5938	2.52339	8.24e-09	7.84e-07	LOC123141617	NC_057811.1	347142779	347143718	+	819	protein_coding	uncharacterized LOC123141617 && - && -	-
123189059	667.361	910.423	693.322	317.149	279.399	233.54	757.035	276.696	1.45276	8.28e-09	7.87e-07	LOC123189059	NC_057797.1	480083843	480087779	+	2392	protein_coding	protein NUCLEAR FUSION DEFECTIVE 4-like%2C transcript variant X1 && - && PF06813:Nodulin-like	NF-YC
123182113	532.199	1860.1	2947.11	357.679	211.786	246.671	1779.81	272.045	2.71001	8.31e-09	7.89e-07	LOC123182113	NC_057796.1	366274753	366276190	-	1270	protein_coding	isoflavone reductase homolog IRL-like && sp|P52580|IFRH_MAIZE Isoflavone reductase homolog IRL OS=Zea mays OX=4577 GN=IRL PE=2 SV=1 && PF05368:NmrA-like family	bHLH
123098400	239.701	224.334	190.614	849.107	490.191	657.476	218.216	665.591	-1.609	8.34e-09	7.91e-07	LOC123098400	NC_057805.1	434129125	434130618	+	1494	protein_coding	probable serine acetyltransferase 4 && sp|Q10QH1|SAT4_ORYSJ Probable serine acetyltransferase 4 OS=Oryza sativa subsp. japonica OX=39947 GN=SAT4 PE=2 SV=1 && PF00132:Bacterial transferase hexapeptide (six repeats)|PF06426:Serine acetyltransferase, N-terminal	HRT-like
123045089	95.0356	30.846	88.8874	7.09278	6.96012	3.75165	71.5897	5.93485	3.59637	8.6e-09	8.14e-07	LOC123045089	NC_057798.1	392976009	392976952	-	851	protein_coding	uncharacterized LOC123045089 && - && -	-
123181216	592.388	308.46	718.013	139.829	141.191	148.19	539.62	143.07	1.91478	8.73e-09	8.26e-07	LOC123181216	NC_057796.1	240416856	240419948	-	1262	protein_coding	calcium uniporter protein 2%2C mitochondrial-like && sp|O64823|MCU2_ARATH Calcium uniporter protein 2, mitochondrial OS=Arabidopsis thaliana OX=3702 GN=At2g23790 PE=2 SV=1 && PF04678:Mitochondrial calcium uniporter	GRAS
123154502	1.05595	3.7389	0	79.0338	31.8177	47.8335	1.59828	52.895	-5.01475	8.81e-09	8.32e-07	LOC123154502	NC_057812.1	85185443	85187386	+	1944	protein_coding	berberine bridge enzyme-like Cyn d 4 && sp|Q5QJ60|CYND4_CYNDA Berberine bridge enzyme-like Cyn d 4 OS=Cynodon dactylon OX=28909 PE=1 SV=1 && PF01565:FAD binding domain|PF08031:Berberine and berberine like	CPP
123079499	2706.4	1383.39	1511.09	587.687	578.684	570.25	1866.96	578.874	1.6892	8.86e-09	8.36e-07	LOC123079499	NC_057802.1	442060757	442092564	+	1859	protein_coding	calmodulin-3-like && sp|P27164|CALM3_PETHY Calmodulin-related protein OS=Petunia hybrida OX=4102 GN=CAM53 PE=2 SV=2 && -	HSF
123166823	611.396	531.859	424.684	183.399	188.917	205.403	522.646	192.573	1.43996	9.06e-09	8.53e-07	LOC123166823	NC_057814.1	165387977	165391650	-	1224	protein_coding	probable peroxygenase 5%2C transcript variant X1 && sp|Q9CAB8|PXG5_ARATH Probable peroxygenase 5 OS=Arabidopsis thaliana OX=3702 GN=PXG5 PE=2 SV=1 && PF05042:Caleosin related protein	bZIP
123115654	55.9654	25.2376	36.5426	153.001	160.083	199.775	39.2485	170.953	-2.12868	9.11e-09	8.57e-07	LOC123115654	NC_057807.1	55628144	55628685	+	542	protein_coding	glutaredoxin-C1-like && sp|Q7G8Y5|GRXC1_ORYSJ Glutaredoxin-C1 OS=Oryza sativa subsp. japonica OX=39947 GN=GRXC1 PE=3 SV=1 && PF00462:Glutaredoxin	-
123093898	25.3428	53.2794	49.3819	180.359	154.117	209.154	42.668	181.21	-2.0823	9.25e-09	8.69e-07	LOC123093898	NC_057804.1	653124823	653126514	+	1372	protein_coding	uncharacterized LOC123093898%2C transcript variant X2 && - && -	-
123053219	1072.85	896.402	987.638	463.057	393.744	376.102	985.629	410.968	1.2621	9.26e-09	8.7e-07	LOC123053219	NC_057799.1	374326576	374328249	-	1296	protein_coding	uncharacterized LOC123053219 && sp|Q56XJ7|Y4276_ARATH Uncharacterized protein At4g22758 OS=Arabidopsis thaliana OX=3702 GN=At4g22758 PE=2 SV=1 && -	HSF
123123944	206.966	166.381	111.603	20.2651	45.7379	17.8203	161.65	27.9411	2.53372	9.44e-09	8.85e-07	LOC123123944	NC_057808.1	564463628	564469155	-	2216	protein_coding	beta-fructofuranosidase%2C insoluble isoenzyme 4-like%2C transcript variant X2 && sp|Q5JJV0|INV4_ORYSJ Beta-fructofuranosidase, insoluble isoenzyme 4 OS=Oryza sativa subsp. japonica OX=39947 GN=CIN4 PE=2 SV=1 && PF00251:Glycosyl hydrolases family 32 N-terminal domain|PF08244:Glycosyl hydrolases family 32 C terminal	-
123054208	44.3499	58.8877	137.282	7.09278	9.94302	4.68956	80.1731	7.24179	3.47323	9.45e-09	8.85e-07	LOC123054208	NC_057799.1	524679516	524684871	+	2029	protein_coding	anthocyanin regulatory R-S protein-like%2C transcript variant X2 && sp|P13027|ARRS_MAIZE Anthocyanin regulatory R-S protein OS=Zea mays OX=4577 GN=R-S PE=2 SV=1 && PF14215:bHLH-MYC and R2R3-MYB transcription factors N-terminal|PF00010:Helix-loop-helix DNA-binding domain	bHLH
542825	880.663	644.026	785.172	338.427	260.507	240.105	769.954	279.68	1.46117	9.49e-09	8.87e-07	LOC542825	NC_057807.1	338288386	338290341	+	1956	protein_coding	delta(8)-fatty-acid desaturase 2 && sp|Q3EBF7|SLD2_ARATH Delta(8)-fatty-acid desaturase 2 OS=Arabidopsis thaliana OX=3702 GN=SLD2 PE=1 SV=1 && PF00173:Cytochrome b5-like Heme/Steroid binding domain|PF00487:Fatty acid desaturase	-
123051583	143.609	141.144	177.775	45.5964	43.7493	27.1994	154.176	38.8484	1.99128	9.6e-09	8.96e-07	LOC123051583	NC_057799.1	64456770	64461312	-	1731	protein_coding	UDP-glucuronic acid decarboxylase 4-like && sp|Q8S8T4|UXS4_ARATH UDP-glucuronic acid decarboxylase 4 OS=Arabidopsis thaliana OX=3702 GN=UXS4 PE=2 SV=1 && PF16363:GDP-mannose 4,6 dehydratase	FAR1
123049482	549.095	364.543	240.984	99.2989	102.413	99.4186	384.874	100.377	1.93847	9.61e-09	8.96e-07	LOC123049482	NC_057799.1	425081095	425082461	-	1025	protein_coding	disease resistance protein RGA5-like && sp|F2VYU4|PIK1_ORYSJ Disease resistance protein Pik-1 OS=Oryza sativa subsp. japonica OX=39947 GN=PIK-1 PE=1 SV=1 && -	-
123041632	43.294	21.4987	223.206	1.01325	2.98291	4.68956	95.9996	2.89524	5.04038	9.74e-09	9.08e-07	LOC123041632	NC_057798.1	556852041	556853815	-	1215	protein_coding	peroxygenase-like && sp|A2XVG1|PXG_ORYSI Peroxygenase OS=Oryza sativa subsp. indica OX=39946 GN=PXG PE=1 SV=1 && PF05042:Caleosin related protein	NAC
123138921	72.8606	10.282	58.2707	0	0	0	47.1378	0	8.02683	9.93e-09	9.24e-07	LOC123138921	NC_057810.1	666760655	666761608	+	852	protein_coding	dehydrin DHN3-like && sp|P12948|DHN3_HORVU Dehydrin DHN3 OS=Hordeum vulgare OX=4513 GN=DHN3 PE=2 SV=1 && PF00257:Dehydrin	-
123146958	186.903	64.4961	98.7638	420.5	503.117	713.751	116.721	545.789	-2.22784	9.94e-09	9.24e-07	LOC123146958	NC_057812.1	714714209	714715360	-	916	lncRNA	uncharacterized LOC123146958 && - && -	-
123045549	1506.84	3512.7	4671.53	742.715	845.157	732.509	3230.36	773.46	2.06237	1.01e-08	9.39e-07	LOC123045549	NC_057798.1	476419520	476427209	-	3029	protein_coding	chloride channel protein CLC-c-like && sp|Q96282|CLCC_ARATH Chloride channel protein CLC-c OS=Arabidopsis thaliana OX=3702 GN=CLC-C PE=1 SV=1 && PF00654:Voltage gated chloride channel	-
123094036	241.813	77.5823	441.474	7.09278	27.8405	34.7027	253.623	23.212	3.44644	1.01e-08	9.39e-07	LOC123094036	NC_057804.1	667554001	667556266	-	1312	protein_coding	uncharacterized LOC123094036%2C transcript variant X1 && - && -	-
123091131	288.275	99.081	120.492	663.681	848.14	784.094	169.282	765.305	-2.17849	1.05e-08	9.75e-07	LOC123091131	NC_057804.1	78824067	78825953	-	1099	protein_coding	LOB domain-containing protein 39-like && sp|Q9FN11|LBD37_ARATH LOB domain-containing protein 37 OS=Arabidopsis thaliana OX=3702 GN=LBD37 PE=2 SV=1 && PF03195:Lateral organ boundaries (LOB) domain	LBD
123092902	1060.17	665.525	835.542	270.539	92.4701	63.778	853.747	142.262	2.58623	1.06e-08	9.85e-07	LOC123092902	NC_057804.1	494496853	494498708	-	1856	protein_coding	allene oxide synthase 2-like && sp|Q7XYS3|C74A2_ORYSJ Allene oxide synthase 2 OS=Oryza sativa subsp. japonica OX=39947 GN=CYP74A2 PE=2 SV=2 && PF00067:Cytochrome P450	MYB
123092862	725.438	807.603	832.579	2512.87	2335.62	1554.12	788.54	2134.2	-1.43626	1.07e-08	9.91e-07	LOC123092862	NC_057804.1	483953641	483958169	+	1688	protein_coding	metal tolerance protein 4-like && sp|Q10PP8|MTP4_ORYSJ Metal tolerance protein 4 OS=Oryza sativa subsp. japonica OX=39947 GN=MTP4 PE=2 SV=1 && PF16916:Dimerisation domain of Zinc Transporter|PF01545:Cation efflux family	Dof
123100437	36.9583	57.953	96.7885	247.234	313.205	257.926	63.8999	272.788	-2.09214	1.1e-08	1.02e-06	LOC123100437	NC_057795.1	679747217	679748842	+	1626	protein_coding	uncharacterized mitochondrial protein AtMg00810-like && sp|Q9ZT94|POLR2_ARATH Retrovirus-related Pol polyprotein from transposon RE2 OS=Arabidopsis thaliana OX=3702 GN=RE2 PE=4 SV=1 && -	WRKY
123049624	28.5107	24.3029	14.8146	86.1266	133.237	121.928	22.5427	113.764	-2.33775	1.11e-08	1.02e-06	LOC123049624	NC_057799.1	477728692	477730326	+	1522	protein_coding	GEM-like protein 7 && sp|Q9FTA0|GEML4_ARATH GEM-like protein 4 OS=Arabidopsis thaliana OX=3702 GN=At5g08350 PE=2 SV=1 && PF02893:GRAM domain	MYB
123162571	92.9237	34.5849	197.528	0	8.94872	7.50329	108.345	5.484	4.29689	1.12e-08	1.03e-06	LOC123162571	NC_057813.1	488034757	488035460	+	607	protein_coding	cysteine-rich and transmembrane domain-containing protein WIH2-like && - && -	-
123123564	128.826	125.253	346.661	19.2518	43.7493	22.5099	200.247	28.5037	2.81314	1.13e-08	1.04e-06	LOC123123564	NC_057808.1	533772232	533773877	-	1547	protein_coding	GEM-like protein 5 && sp|Q9LYV6|GEML5_ARATH GEM-like protein 5 OS=Arabidopsis thaliana OX=3702 GN=At5g13200 PE=1 SV=1 && PF02893:GRAM domain	MYB
123134311	227.029	197.227	259.749	68.9013	80.5385	47.8335	228.002	65.7578	1.79516	1.15e-08	1.06e-06	LOC123134311	NC_057810.1	505690763	505691649	-	792	protein_coding	uncharacterized LOC123134311%2C transcript variant X2 && - && -	-
123187547	305.17	220.595	204.441	75.9941	71.5898	78.7846	243.402	75.4561	1.68866	1.17e-08	1.07e-06	LOC123187547	NC_057797.1	70062522	70064572	-	1434	protein_coding	stress-related protein-like && sp|Q9SW70|SRP_VITRI Stress-related protein OS=Vitis riparia OX=96939 GN=SRP PE=2 SV=1 && PF05755:Rubber elongation factor protein (REF)	-
123093946	121.434	166.381	123.455	424.553	349	387.357	137.09	386.97	-1.49576	1.19e-08	1.09e-06	LOC123093946	NC_057804.1	658071536	658073280	+	1314	protein_coding	2-oxoglutarate-dependent dioxygenase 11-like%2C transcript variant X1 && sp|Q94LP4|ODD11_ORYSJ 2-oxoglutarate-dependent dioxygenase 11 OS=Oryza sativa subsp. japonica OX=39947 GN=2ODD11 PE=1 SV=1 && PF03171:2OG-Fe(II) oxygenase superfamily|PF14226:non-haem dioxygenase in morphine synthesis N-terminal	STAT
123092640	310.45	57.0183	1926.88	4.05302	0.994302	3.75165	764.783	2.93299	8.02562	1.19e-08	1.09e-06	LOC123092640	NC_057794.1	59713700	59716113	-	1795	protein_coding	uncharacterized LOC123092640%2C transcript variant X1 && - && -	E2F/DP
123098192	1013.71	1311.42	1347.14	558.303	438.487	450.197	1224.09	482.329	1.34394	1.19e-08	1.09e-06	LOC123098192	NC_057805.1	402125700	402130799	+	4417	protein_coding	alpha%2Calpha-trehalose-phosphate synthase [UDP-forming] 6-like%2C transcript variant X1 && sp|Q94AH8|TPS6_ARATH Alpha,alpha-trehalose-phosphate synthase [UDP-forming] 6 OS=Arabidopsis thaliana OX=3702 GN=TPS6 PE=1 SV=2 && -	-
novel.299	332.625	157.034	172.837	38.5037	53.6923	53.4609	220.832	48.5523	2.18339	1.21e-08	1.1e-06	-	NC_057795.1	603104035	603105011	+	977	-	- && - && -	-
123054318	14.7833	4.67363	15.8022	280.671	175.992	32.8269	11.7531	163.163	-3.80028	1.22e-08	1.11e-06	LOC123054318	NC_057799.1	538670859	538672989	-	2131	protein_coding	vegetative cell wall protein gp1-like && sp|Q00451|PRF1_SOLLC 36.4 kDa proline-rich protein OS=Solanum lycopersicum OX=4081 GN=TPRP-F1 PE=2 SV=1 && PF14547:Hydrophobic seed protein	Trihelix
123113416	143.609	147.687	187.651	470.15	428.544	389.233	159.649	429.309	-1.42675	1.23e-08	1.12e-06	LOC123113416	NC_057807.1	584870550	584872769	+	1919	protein_coding	probable N-acetyltransferase HLS1 && sp|Q42381|HLS1_ARATH Probable N-acetyltransferase HLS1 OS=Arabidopsis thaliana OX=3702 GN=HLS1 PE=1 SV=1 && PF00583:Acetyltransferase (GNAT) family	-
123165004	305.17	435.582	352.587	131.723	109.373	135.997	364.446	125.698	1.53605	1.26e-08	1.14e-06	LOC123165004	NC_057814.1	523756906	523759074	-	2053	protein_coding	alpha-1%2C3-arabinosyltransferase XAT3-like && sp|Q10I20|XAT3_ORYSJ Alpha-1,3-arabinosyltransferase XAT3 OS=Oryza sativa subsp. japonica OX=39947 GN=XAT3 PE=1 SV=1 && PF04577:Protein of unknown function (DUF563)	C2H2
123166092	496.297	536.533	571.843	228.995	226.701	213.844	534.891	223.18	1.26134	1.28e-08	1.16e-06	LOC123166092	NC_057814.1	82930602	82933815	+	1544	protein_coding	dehydrodolichyl diphosphate synthase CPT3-like && sp|K7WCI9|CPT3_SOLLC Dehydrodolichyl diphosphate synthase CPT3 OS=Solanum lycopersicum OX=4081 GN=CPT3 PE=1 SV=1 && -	-
123114983	621.955	444.93	685.421	224.942	104.402	146.314	584.102	158.553	1.88153	1.28e-08	1.17e-06	LOC123114983	NC_057795.1	187674511	187676621	-	2111	protein_coding	leucine-rich repeat extensin-like protein 4 && sp|Q9T0K5|LRX3_ARATH Leucine-rich repeat extensin-like protein 3 OS=Arabidopsis thaliana OX=3702 GN=LRX3 PE=1 SV=1 && PF13855:Leucine rich repeat	C3H
123106084	1.05595	9.34726	8.88874	55.729	61.6467	90.0395	6.43065	69.1384	-3.40927	1.31e-08	1.19e-06	LOC123106084	NC_057806.1	694843261	694845964	+	2704	protein_coding	uncharacterized LOC123106084 && - && PF04578:Protein of unknown function, DUF594|PF13968:Domain of unknown function (DUF4220)	-
123167324	5252.3	4370.78	3575.25	1543.19	2008.49	1574.75	4399.44	1708.81	1.36431	1.32e-08	1.19e-06	LOC123167324	NC_057814.1	552773890	552787700	-	2413	protein_coding	glutathione synthetase%2C chloroplastic-like%2C transcript variant X2 && sp|O23732|GSHB_BRAJU Glutathione synthetase, chloroplastic OS=Brassica juncea OX=3707 GN=GSH2 PE=2 SV=1 && PF03199:Eukaryotic glutathione synthase|PF03917:Eukaryotic glutathione synthase, ATP binding domain	-
123146663	0	6.54308	0.987638	106.392	34.8006	53.4609	2.51024	64.8844	-4.64906	1.33e-08	1.2e-06	LOC123146663	NC_057795.1	666682231	666683474	+	672	protein_coding	protein RADIALIS-like 3 && sp|Q6NNN0|RADL3_ARATH Protein RADIALIS-like 3 OS=Arabidopsis thaliana OX=3702 GN=RL3 PE=2 SV=1 && -	MYB_related
123137699	2001.03	1589.03	1750.09	820.736	768.596	778.466	1780.05	789.266	1.17324	1.34e-08	1.21e-06	LOC123137699	NC_057810.1	509151025	509153852	+	1822	protein_coding	S-adenosylmethionine synthase 3 && sp|Q4LB22|METK3_HORVU S-adenosylmethionine synthase 3 OS=Hordeum vulgare OX=4513 GN=SAM3 PE=2 SV=1 && PF00438:S-adenosylmethionine synthetase, N-terminal domain|PF02772:S-adenosylmethionine synthetase, central domain|PF02773:S-adenosylmethionine synthetase, C-terminal domain	-
123056965	187.959	991.744	1622.69	130.71	100.425	114.425	934.131	115.187	3.01986	1.34e-08	1.21e-06	LOC123056965	NC_057794.1	464948951	464950657	-	1238	transcribed_pseudogene	isoflavone reductase homolog IRL-like && sp|P52580|IFRH_MAIZE Isoflavone reductase homolog IRL OS=Zea mays OX=4577 GN=IRL PE=2 SV=1 && PF05368:NmrA-like family	bHLH
123046695	386.478	508.491	528.386	1079.12	1160.35	1314.01	474.452	1184.49	-1.3196	1.36e-08	1.23e-06	LOC123046695	NC_057798.1	683438243	683442615	-	3673	protein_coding	uncharacterized LOC123046695 && sp|D1FP57|LIN2_LOTJA Putative E3 ubiquitin-protein ligase LIN-2 OS=Lotus japonicus OX=34305 GN=LIN PE=1 SV=1 && PF04564:U-box domain	GeBP
123164645	6523.67	4758.69	7333.21	1881.61	2215.31	2720.88	6205.19	2272.6	1.44904	1.39e-08	1.25e-06	LOC123164645	NC_057814.1	422140589	422146467	+	1954	protein_coding	spermine synthase-like%2C transcript variant X2 && sp|Q94BN2|SPSY_ARATH Spermine synthase OS=Arabidopsis thaliana OX=3702 GN=SPMS PE=1 SV=1 && PF17284:Spermidine synthase tetramerisation domain|PF01564:Spermine/spermidine synthase domain	NAC
123180703	659.969	389.781	798.012	170.227	37.7835	99.4186	615.921	102.476	2.58776	1.4e-08	1.26e-06	LOC123180703	NC_057796.1	122072510	122074636	-	2127	protein_coding	leucine-rich repeat extensin-like protein 4 && sp|Q9T0K5|LRX3_ARATH Leucine-rich repeat extensin-like protein 3 OS=Arabidopsis thaliana OX=3702 GN=LRX3 PE=1 SV=1 && PF13855:Leucine rich repeat	C3H
123120385	127.77	114.037	165.923	12.1591	36.7892	26.2615	135.91	25.0699	2.4369	1.41e-08	1.26e-06	LOC123120385	NC_057808.1	236325388	236326609	-	1222	protein_coding	uncharacterized LOC123120385 && - && PF03168:Late embryogenesis abundant protein	-
123148586	31.6785	57.953	76.0481	353.626	207.809	205.403	55.2266	255.612	-2.20783	1.41e-08	1.27e-06	LOC123148586	NC_057795.1	678944965	678950657	+	2959	protein_coding	uncharacterized LOC123148586 && sp|Q6NW58|SPAST_DANRE Spastin OS=Danio rerio OX=7955 GN=spast PE=2 SV=2 && PF00004:ATPase family associated with various cellular activities (AAA)|PF17862:AAA+ lid domain	Trihelix
123175146	55.9654	85.9948	76.0481	300.936	184.94	321.704	72.6694	269.193	-1.88746	1.46e-08	1.3e-06	LOC123175146	NW_025229534.1	18020	20528	+	1735	transcribed_pseudogene	uncharacterized LOC123175146 && - && -	-
123110640	166.84	171.99	255.798	54.7157	38.7778	61.9022	198.209	51.7986	1.93514	1.51e-08	1.35e-06	LOC123110640	NC_057807.1	104906649	104910907	+	2702	protein_coding	probable inactive purple acid phosphatase 1 && sp|Q9LMX4|PPA1_ARATH Probable inactive purple acid phosphatase 1 OS=Arabidopsis thaliana OX=3702 GN=PAP1 PE=2 SV=1 && PF00149:Calcineurin-like phosphoesterase|PF14008:Iron/zinc purple acid phosphatase-like protein C|PF16656:Purple acid Phosphatase, N-terminal domain|PF17808:Fn3-like domain from Purple Acid Phosphatase	GRAS
123112640	124.602	76.6475	184.688	22.2916	14.9145	28.1373	128.646	21.7812	2.55955	1.55e-08	1.38e-06	LOC123112640	NC_057807.1	481742460	481748414	-	1958	protein_coding	beta-glucosidase 31-like && sp|B7F7K7|BGL31_ORYSJ Beta-glucosidase 31 OS=Oryza sativa subsp. japonica OX=39947 GN=BGLU31 PE=2 SV=1 && PF00232:Glycosyl hydrolase family 1	NAC
123060421	149.945	108.428	192.589	28.3711	23.8633	44.0818	150.321	32.1054	2.22385	1.55e-08	1.38e-06	LOC123060421	NC_057794.1	499552033	499553294	+	1262	protein_coding	uncharacterized protein At5g19025-like && sp|P0C8Q9|Y5902_ARATH Uncharacterized protein At5g19025 OS=Arabidopsis thaliana OX=3702 GN=At5g19025 PE=2 SV=3 && -	-
123150068	285.107	363.608	580.731	29.3844	119.316	40.3302	409.815	63.0103	2.70188	1.57e-08	1.4e-06	LOC123150068	NC_057812.1	103899291	103901826	-	1441	protein_coding	bidirectional sugar transporter SWEET15-like && sp|Q6K602|SWT15_ORYSJ Bidirectional sugar transporter SWEET15 OS=Oryza sativa subsp. japonica OX=39947 GN=SWEET15 PE=2 SV=1 && PF03083:Sugar efflux transporter for intercellular exchange	DBB
123185728	116.155	53.2794	84.9369	243.181	377.835	385.482	84.7903	335.499	-1.9873	1.58e-08	1.41e-06	LOC123185728	NC_057797.1	621568854	621570060	+	1116	protein_coding	putative GEM-like protein 8 && sp|Q9FMW4|GEML8_ARATH Putative GEM-like protein 8 OS=Arabidopsis thaliana OX=3702 GN=At5g23370 PE=3 SV=1 && PF02893:GRAM domain	MYB
123157457	115.099	179.467	184.688	490.415	410.647	543.051	159.751	481.371	-1.59015	1.59e-08	1.42e-06	LOC123157457	NC_057813.1	722812608	722816901	+	3410	protein_coding	leucine-rich repeat receptor-like kinase protein FLORAL ORGAN NUMBER1 && sp|Q5Z9N5|FON1_ORYSJ Leucine-rich repeat receptor-like kinase protein FLORAL ORGAN NUMBER1 OS=Oryza sativa subsp. japonica OX=39947 GN=FON1 PE=1 SV=1 && PF13855:Leucine rich repeat|PF00069:Protein kinase domain	STAT
123051071	137.274	123.384	130.368	35.4639	37.7835	36.5785	130.342	36.6086	1.8316	1.61e-08	1.43e-06	LOC123051071	NC_057799.1	11779978	11788064	-	5886	protein_coding	disease resistance protein PIK6-NP-like%2C transcript variant X1 && sp|Q2R8L1|RGA5S_ORYSJ Disease resistance protein RGA5 OS=Oryza sativa subsp. japonica OX=39947 GN=RGA5 PE=2 SV=1 && -	NAC
123189408	171.064	195.358	192.589	529.932	464.339	422.998	186.337	472.423	-1.34145	1.62e-08	1.43e-06	LOC123189408	NC_057797.1	559316754	559321156	-	1957	protein_coding	glutathione hydrolase 1-like && sp|Q680I5|GAGT2_ARATH Glutathione hydrolase 2 OS=Arabidopsis thaliana OX=3702 GN=GGT2 PE=2 SV=1 && PF01019:Gamma-glutamyltranspeptidase	HB-other
123081900	58.0773	60.7572	203.453	2.02651	12.9259	9.37911	107.429	8.11052	3.72392	1.63e-08	1.45e-06	LOC123081900	NC_057803.1	160984716	160986409	+	1408	protein_coding	galactinol synthase 1-like && sp|O22893|GOLS1_ARATH Galactinol synthase 1 OS=Arabidopsis thaliana OX=3702 GN=GOLS1 PE=1 SV=1 && PF01501:Glycosyl transferase family 8	-
123129091	1654.68	1492.76	2202.43	765.007	565.758	687.489	1783.29	672.751	1.40639	1.65e-08	1.46e-06	LOC123129091	NC_057809.1	614537565	614539008	-	1211	protein_coding	aquaporin PIP1-5-like && sp|Q9AR14|PIP15_MAIZE Aquaporin PIP1-5 OS=Zea mays OX=4577 GN=PIP1-5 PE=2 SV=1 && PF00230:Major intrinsic protein	C3H
123093352	140.441	90.6684	62.2212	17.2253	4.97151	15.0066	97.777	12.4011	2.97725	1.67e-08	1.48e-06	LOC123093352	NC_057804.1	576060102	576062938	-	1780	protein_coding	cytochrome P450 716A1-like%2C transcript variant X1 && sp|Q50EK1|C16B1_PICSI Cytochrome P450 716B1 OS=Picea sitchensis OX=3332 GN=CYP716B1 PE=2 SV=1 && PF00067:Cytochrome P450	NAC
123064747	0	0	0	58.7687	15.9088	40.3302	0	38.3359	-7.71532	1.68e-08	1.49e-06	LOC123064747	NC_057801.1	59625582	59627656	+	1576	protein_coding	RNA exonuclease 4-like && sp|Q08237|REXO4_YEAST RNA exonuclease 4 OS=Saccharomyces cerevisiae (strain ATCC 204508 / S288c) OX=559292 GN=REX4 PE=1 SV=1 && PF00929:Exonuclease	C2H2
123181268	316.785	100.95	178.763	20.2651	32.812	43.1439	198.833	32.0737	2.62863	1.7e-08	1.5e-06	LOC123181268	NC_057796.1	249933413	249934798	-	1386	protein_coding	NDR1/HIN1-like protein 6 && sp|Q8LD98|NHL6_ARATH NDR1/HIN1-like protein 6 OS=Arabidopsis thaliana OX=3702 GN=NHL6 PE=1 SV=1 && PF03168:Late embryogenesis abundant protein	G2-like
123098680	1503.67	1915.25	1755.03	4137.12	4079.62	3514.35	1724.65	3910.36	-1.18084	1.72e-08	1.51e-06	LOC123098680	NC_057805.1	467378487	467386978	+	3540	protein_coding	phosphoinositide phosphatase SAC2-like%2C transcript variant X1 && sp|Q94A27|SAC2_ARATH Phosphoinositide phosphatase SAC2 OS=Arabidopsis thaliana OX=3702 GN=SAC2 PE=2 SV=1 && PF02383:SacI homology domain	MYB
123119044	163.672	183.206	86.9122	14.1856	37.7835	15.0066	144.597	22.3252	2.69679	1.72e-08	1.51e-06	LOC123119044	NC_057808.1	4685373	4688322	-	1805	protein_coding	obtusifoliol 14-alpha demethylase-like && sp|P93846|CP51_SORBI Obtusifoliol 14-alpha demethylase OS=Sorghum bicolor OX=4558 GN=CYP51 PE=1 SV=1 && PF00067:Cytochrome P450	bHLH
123043706	20.0631	2.80418	7.90111	131.723	113.35	60.9642	10.2561	102.013	-3.33022	1.72e-08	1.51e-06	LOC123043706	NC_057798.1	101636190	101637956	-	1564	protein_coding	peroxidase 2-like && sp|A2YPX3|PER2_ORYSI Peroxidase 2 OS=Oryza sativa subsp. indica OX=39946 GN=PRX112 PE=3 SV=2 && PF00141:Peroxidase	NAC
123094210	0	0	0	45.5964	29.8291	26.2615	0	33.8957	-7.53707	1.73e-08	1.52e-06	LOC123094210	NC_057804.1	13643535	13644209	-	675	protein_coding	auxin-responsive protein SAUR71-like && sp|Q9SGU2|SAU71_ARATH Auxin-responsive protein SAUR71 OS=Arabidopsis thaliana OX=3702 GN=SAUR71 PE=2 SV=1 && PF02519:Auxin responsive protein	ZF-HD
123144127	317.841	174.794	319.007	75.9941	76.5613	74.095	270.547	75.5501	1.83971	1.75e-08	1.54e-06	LOC123144127	NC_057811.1	136388911	136390874	-	1085	protein_coding	FCS-Like Zinc finger 12-like && sp|F4IE21|FLZ12_ARATH FCS-Like Zinc finger 12 OS=Arabidopsis thaliana OX=3702 GN=FLZ12 PE=1 SV=2 && PF04570:zinc-finger of the FCS-type, C2-C2	ERF
123096485	696.928	365.478	623.2	147.935	185.935	180.079	561.868	171.316	1.71288	1.79e-08	1.57e-06	LOC123096485	NC_057805.1	99462271	99465153	-	2074	protein_coding	CBL-interacting protein kinase 15-like && sp|Q2QYM3|CIPKE_ORYSJ CBL-interacting protein kinase 14 OS=Oryza sativa subsp. japonica OX=39947 GN=CIPK14 PE=2 SV=1 && -	YABBY
123182245	49.6297	45.8016	145.183	5.06627	8.94872	7.50329	80.2047	7.17276	3.48157	1.89e-08	1.65e-06	LOC123182245	NC_057796.1	381981237	381984231	+	2264	protein_coding	glycerol-3-phosphate acyltransferase 5-like && sp|Q9CAY3|GPAT5_ARATH Glycerol-3-phosphate acyltransferase 5 OS=Arabidopsis thaliana OX=3702 GN=GPAT5 PE=1 SV=1 && -	-
123103761	189.015	46.7363	310.118	24.3181	11.9316	19.6961	181.957	18.6486	3.28619	1.9e-08	1.66e-06	LOC123103761	NC_057806.1	427460620	427462314	+	1288	protein_coding	protein TIFY 10c-like && sp|A2Z1N3|TI10C_ORYSI Protein TIFY 10c OS=Oryza sativa subsp. indica OX=39946 GN=TIFY10C PE=3 SV=1 && PF06200:tify domain|PF09425:Divergent CCT motif	-
123072593	24791.6	18543.1	11492.2	6824.27	5054.04	4758.96	18275.6	5545.76	1.72047	1.91e-08	1.67e-06	LOC123072593	NC_057801.1	812177444	812179447	+	2004	protein_coding	phospholipase A1-Igamma1%2C chloroplastic-like && sp|Q941F1|PLA15_ARATH Phospholipase A1-Igamma1, chloroplastic OS=Arabidopsis thaliana OX=3702 GN=DALL4 PE=1 SV=2 && PF01764:Lipase (class 3)	Trihelix
123054134	252.372	242.094	376.29	678.88	919.73	1160.2	290.252	919.602	-1.66387	1.91e-08	1.67e-06	LOC123054134	NC_057799.1	511864259	511867810	-	1892	protein_coding	F-box protein PP2-A13-like && sp|Q9LEX0|P2A13_ARATH F-box protein PP2-A13 OS=Arabidopsis thaliana OX=3702 GN=PP2A13 PE=1 SV=1 && PF14299:Phloem protein 2	GRAS
123111412	378.03	386.042	1113.07	116.524	149.145	99.4186	625.714	121.696	2.36255	1.92e-08	1.67e-06	LOC123111412	NC_057807.1	283688091	283692210	+	2339	protein_coding	protein MALE DISCOVERER 2-like%2C transcript variant X2 && sp|C0LGQ4|MDIS2_ARATH Protein MALE DISCOVERER 2 OS=Arabidopsis thaliana OX=3702 GN=MDIS2 PE=1 SV=1 && PF07714:Protein tyrosine kinase	GRAS
123146695	0	0	1.97528	66.8748	39.7721	62.8401	0.658425	56.4956	-6.41927	1.94e-08	1.69e-06	LOC123146695	NC_057795.1	666686925	666687283	+	359	protein_coding	protein RADIALIS-like 3 && sp|Q8GW75|RADL5_ARATH Protein RADIALIS-like 5 OS=Arabidopsis thaliana OX=3702 GN=RL5 PE=3 SV=1 && -	MYB_related
123190022	526.92	763.671	1974.29	220.889	235.65	155.693	1088.29	204.077	2.4152	2e-08	1.74e-06	LOC123190022	NC_057797.1	655979374	655985323	-	2811	protein_coding	SPX domain-containing membrane protein OsI_17046-like && sp|B8AT51|SPXM2_ORYSI SPX domain-containing membrane protein OsI_17046 OS=Oryza sativa subsp. indica OX=39946 GN=OsI_17046 PE=3 SV=1 && PF07690:Major Facilitator Superfamily|PF03105:SPX domain	C3H
123185945	6.33571	8.41253	6.91347	75.9941	70.5955	39.3923	7.22057	61.9939	-3.09667	2e-08	1.74e-06	LOC123185945	NC_057797.1	687289236	687290138	+	615	lncRNA	uncharacterized LOC123185945 && - && -	-
123157266	315.729	291.635	203.453	87.1399	84.5157	89.1016	270.272	86.919	1.63633	2.01e-08	1.74e-06	LOC123157266	NC_057813.1	103061379	103062915	-	869	protein_coding	FCS-Like Zinc finger 6-like && sp|Q9SGZ8|FLZ6_ARATH FCS-Like Zinc finger 6 OS=Arabidopsis thaliana OX=3702 GN=FLZ6 PE=1 SV=1 && PF04570:zinc-finger of the FCS-type, C2-C2	-
123063502	39986.8	23336.4	14357.3	8429.26	5432.87	4714.88	25893.5	6192.34	2.06404	2.02e-08	1.75e-06	LOC123063502	NC_057800.1	724955639	724957665	+	2027	protein_coding	phospholipase A1-Igamma1%2C chloroplastic-like && sp|Q941F1|PLA15_ARATH Phospholipase A1-Igamma1, chloroplastic OS=Arabidopsis thaliana OX=3702 GN=DALL4 PE=1 SV=2 && PF01764:Lipase (class 3)	Trihelix
123152549	359.023	364.543	344.686	1048.72	712.915	944.477	356.084	902.037	-1.34094	2.12e-08	1.83e-06	LOC123152549	NC_057795.1	551338990	551340800	+	1811	rRNA	18S ribosomal RNA && - && -	-
123107239	36.9583	31.7807	90.8627	2.02651	0	0.937911	53.2006	0.98814	5.75924	2.12e-08	1.83e-06	LOC123107239	NC_057806.1	476088944	476089697	+	754	protein_coding	uncharacterized LOC123107239 && - && PF13499:EF-hand domain pair	-
123075280	32.7345	21.4987	12.8393	87.1399	139.202	135.059	22.3575	120.467	-2.43487	2.12e-08	1.83e-06	LOC123075280	NC_057802.1	543646685	543647726	+	1042	protein_coding	uncharacterized LOC123075280 && - && PF14364:Domain of unknown function (DUF4408)	-
123053145	149.945	115.906	80.9863	26.3446	23.8633	24.3857	115.612	24.8645	2.21661	2.19e-08	1.89e-06	LOC123053145	NC_057799.1	358461208	358466369	+	3600	protein_coding	protein NUCLEAR FUSION DEFECTIVE 4-like%2C transcript variant X1 && - && PF06813:Nodulin-like	NF-YC
123045745	1124.59	1102.98	1476.52	3292.06	2612.03	3042.58	1234.69	2982.23	-1.27223	2.21e-08	1.9e-06	LOC123045745	NC_057798.1	513553596	513560255	-	2675	protein_coding	copper methylamine oxidase-like && sp|Q07121|AMO1_ARTS1 Primary amine oxidase OS=Arthrobacter sp. (strain P1) OX=47915 GN=maoI PE=1 SV=1 && PF02728:Copper amine oxidase, N3 domain|PF01179:Copper amine oxidase, enzyme domain	-
123105079	154.169	112.167	152.096	39.5169	39.7721	26.2615	139.477	35.1835	1.98857	2.22e-08	1.91e-06	LOC123105079	NC_057806.1	592375139	592377719	+	2005	protein_coding	UDP-glucose 6-dehydrogenase 4-like && sp|Q2QS14|UGDH4_ORYSJ UDP-glucose 6-dehydrogenase 4 OS=Oryza sativa subsp. japonica OX=39947 GN=UGD4 PE=2 SV=1 && PF03721:UDP-glucose/GDP-mannose dehydrogenase family, NAD binding domain|PF03720:UDP-glucose/GDP-mannose dehydrogenase family, UDP binding domain|PF00984:UDP-glucose/GDP-mannose dehydrogenase family, central domain	MYB_related
123093631	34.8464	44.8668	41.4808	120.577	150.14	181.017	40.398	150.578	-1.89685	2.22e-08	1.91e-06	LOC123093631	NC_057804.1	618893536	618898807	+	2044	protein_coding	uncharacterized LOC123093631 && - && -	-
123051441	297.778	288.83	438.511	101.325	98.4359	128.494	341.707	109.418	1.64216	2.24e-08	1.93e-06	LOC123051441	NC_057799.1	45714094	45722786	-	3212	protein_coding	uncharacterized LOC123051441 && sp|Q7NV72|DDLA_CHRVO D-alanine--D-alanine ligase A OS=Chromobacterium violaceum (strain ATCC 12472 / DSM 30191 / JCM 1249 / NBRC 12614 / NCIMB 9131 / NCTC 9757) OX=243365 GN=ddlA PE=3 SV=1 && PF07478:D-ala D-ala ligase C-terminus|PF01820:D-ala D-ala ligase N-terminus	-
100873135	163.672	296.308	293.329	52.6892	83.5214	45.9577	251.103	60.7228	2.04954	2.31e-08	1.98e-06	LOC100873135	NC_057800.1	219501899	219503512	+	1173	protein_coding	TLC domain-containing protein 5 && - && PF03798:TLC domain	-
123075813	20.0631	15.8903	100.739	0	0	0	45.5642	0	7.97982	2.33e-08	2e-06	LOC123075813	NC_057802.1	601186458	601188082	+	1413	protein_coding	uncharacterized LOC123075813 && - && -	-
123043725	55.9654	70.1044	65.1841	12.1591	6.96012	9.37911	63.7513	9.49943	2.7487	2.35e-08	2.01e-06	LOC123043725	NC_057798.1	104778686	104783431	-	1815	protein_coding	UDP-glucuronic acid decarboxylase 2-like && sp|Q9LZI2|UXS2_ARATH UDP-glucuronic acid decarboxylase 2 OS=Arabidopsis thaliana OX=3702 GN=UXS2 PE=1 SV=1 && PF16363:GDP-mannose 4,6 dehydratase	FAR1
123156531	195.351	93.4726	184.688	40.5302	27.8405	32.8269	157.837	33.7325	2.22571	2.35e-08	2.01e-06	LOC123156531	NC_057813.1	710240982	710249728	+	2106	protein_coding	probable plastidic glucose transporter 3%2C transcript variant X1 && sp|Q9FYG3|PLST2_ARATH Probable plastidic glucose transporter 2 OS=Arabidopsis thaliana OX=3702 GN=At1g67300 PE=2 SV=1 && PF00083:Sugar (and other) transporter	GRAS
123074525	71.8047	49.5405	148.146	8.10603	9.94302	14.0687	89.8303	10.7059	3.06459	2.4e-08	2.05e-06	LOC123074525	NC_057802.1	299943981	299945223	-	1243	protein_coding	uncharacterized LOC123074525 && - && -	-
123093805	108.763	95.342	143.208	30.3976	27.8405	24.3857	115.771	27.5413	2.07266	2.41e-08	2.06e-06	LOC123093805	NC_057804.1	643228177	643230475	+	2299	protein_coding	subtilisin-like protease 4 && sp|A9QY38|SBT4_LOTJA Subtilisin-like protease 4 OS=Lotus japonicus OX=34305 GN=SBTM4 PE=2 SV=1 && PF00082:Subtilase family|PF02225:PA domain|PF17766:Fibronectin type-III domain	Trihelix
778400	451.947	483.253	537.275	183.399	191.9	220.409	490.825	198.57	1.30523	2.5e-08	2.13e-06	LOC778400	NC_057803.1	608698079	608703559	-	2405	protein_coding	beta-fructofuranosidase%2C insoluble isoenzyme 4 && sp|Q5JJV0|INV4_ORYSJ Beta-fructofuranosidase, insoluble isoenzyme 4 OS=Oryza sativa subsp. japonica OX=39947 GN=CIN4 PE=2 SV=1 && PF08244:Glycosyl hydrolases family 32 C terminal|PF00251:Glycosyl hydrolases family 32 N-terminal domain	-
543132	200.631	173.859	168.886	38.5037	66.6183	32.8269	181.125	45.9829	1.97891	2.52e-08	2.15e-06	LOC543132	NC_057811.1	449838397	449840224	+	1066	protein_coding	ribonuclease 1 && sp|P42813|RNS1_ARATH Ribonuclease 1 OS=Arabidopsis thaliana OX=3702 GN=RNS1 PE=1 SV=1 && PF00445:Ribonuclease T2 family	bZIP
123071827	84.4761	78.517	61.2336	260.406	249.57	193.21	74.7422	234.395	-1.64911	2.54e-08	2.16e-06	LOC123071827	NC_057801.1	696039269	696042312	-	1343	protein_coding	bidirectional sugar transporter SWEET1a-like && sp|P0DKJ3|SWT1A_SORBI Bidirectional sugar transporter SWEET1a OS=Sorghum bicolor OX=4558 GN=SWEET1A PE=3 SV=1 && PF03083:Sugar efflux transporter for intercellular exchange	DBB
123051287	436.108	215.922	896.776	108.418	96.4473	57.2126	516.268	87.3594	2.5638	2.56e-08	2.17e-06	LOC123051287	NC_057799.1	30376278	30378986	+	2499	protein_coding	UDP-glycosyltransferase 73C4-like%2C transcript variant X2 && sp|Q8VZE9|U73B1_ARATH UDP-glycosyltransferase 73B1 OS=Arabidopsis thaliana OX=3702 GN=UGT73B1 PE=2 SV=1 && -	HSF
123147483	80.2523	142.078	615.299	20.2651	35.7949	22.5099	279.21	26.1899	3.41465	2.56e-08	2.17e-06	LOC123147483	NC_057812.1	448348916	448353334	-	1906	protein_coding	lysine histidine transporter 2-like && sp|Q9FKS8|LHT1_ARATH Lysine histidine transporter 1 OS=Arabidopsis thaliana OX=3702 GN=LHT1 PE=1 SV=1 && PF01490:Transmembrane amino acid transporter protein	MYB_related
123095902	311.506	340.24	691.347	115.511	123.293	111.611	447.698	116.805	1.93862	2.62e-08	2.22e-06	LOC123095902	NC_057805.1	26592576	26596598	-	3226	protein_coding	receptor protein kinase TMK1-like && sp|P43298|TMK1_ARATH Receptor protein kinase TMK1 OS=Arabidopsis thaliana OX=3702 GN=TMK1 PE=1 SV=1 && PF13855:Leucine rich repeat|PF12799:Leucine Rich repeats (2 copies)|PF00069:Protein kinase domain	GRAS
123120389	466.73	374.825	754.556	136.789	179.969	151.004	532.037	155.921	1.7706	2.64e-08	2.24e-06	LOC123120389	NC_057808.1	236962480	236967950	-	1786	protein_coding	ethanolamine-phosphate cytidylyltransferase-like && sp|Q9ZVI9|PECT1_ARATH Ethanolamine-phosphate cytidylyltransferase OS=Arabidopsis thaliana OX=3702 GN=PECT1 PE=1 SV=1 && PF01467:Cytidylyltransferase-like	FAR1
123117116	66.5249	18.6945	142.22	0	1.9886	0	75.8131	0.662868	6.85291	2.65e-08	2.24e-06	LOC123117116	NC_057807.1	606325055	606325920	-	783	protein_coding	dehydrin Rab15-like && sp|Q00742|DHR15_WHEAT Dehydrin Rab15 OS=Triticum aestivum OX=4565 GN=RAB15 PE=2 SV=1 && PF00257:Dehydrin	-
novel.1245	178.456	94.4073	66.1718	5.06627	0.994302	18.7582	113.012	8.27293	3.75929	2.66e-08	2.25e-06	-	NC_057801.1	612092453	612093302	+	632	-	- && sp|B3H6D0|HIP45_ARATH Heavy metal-associated isoprenylated plant protein 45 OS=Arabidopsis thaliana OX=3702 GN=HIPP45 PE=3 SV=1 && PF00403:Heavy-metal-associated domain	-
123047325	41.1821	75.7128	58.2707	223.929	207.809	182.893	58.3885	204.877	-1.80717	2.74e-08	2.31e-06	LOC123047325	NC_057798.1	776293400	776298623	+	2189	protein_coding	polyamine oxidase 5-like && sp|Q0J954|PAO5_ORYSJ Polyamine oxidase 5 OS=Oryza sativa subsp. japonica OX=39947 GN=PAO5 PE=1 SV=1 && PF01593:Flavin containing amine oxidoreductase	bHLH
novel.2826	90.8118	96.2768	177.775	18.2386	23.8633	28.1373	121.621	23.4131	2.37507	2.78e-08	2.34e-06	-	NC_057811.1	474956471	474959604	-	754	-	- && - && -	-
novel.955	303.058	119.645	1167.39	8.10603	17.8974	13.1308	530.03	13.0447	5.34412	2.82e-08	2.37e-06	-	NC_057799.1	155482803	155486771	-	2456	-	- && - && -	-
123041186	99.2594	49.5405	117.529	6.07953	12.9259	15.9445	88.7763	11.65	2.9236	2.82e-08	2.37e-06	LOC123041186	NC_057798.1	262502594	262503565	+	972	protein_coding	uncharacterized LOC123041186 && - && PF04520:Senescence regulator	-
123112392	728.606	793.582	804.925	274.592	172.014	332.021	775.705	259.542	1.57914	2.84e-08	2.39e-06	LOC123112392	NC_057807.1	450600627	450604725	+	1681	protein_coding	serine carboxypeptidase-like 9%2C transcript variant X1 && sp|O64811|SCP9_ARATH Serine carboxypeptidase-like 9 OS=Arabidopsis thaliana OX=3702 GN=SCPL9 PE=2 SV=1 && PF00450:Serine carboxypeptidase	C3H
123120888	954.58	805.734	1040.97	347.546	440.476	349.841	933.761	379.288	1.29973	2.85e-08	2.39e-06	LOC123120888	NC_057808.1	275916525	275922530	-	1724	protein_coding	phosphatidylinositol/phosphatidylcholine transfer protein SFH9-like && sp|Q75DK1|SEC14_ASHGO SEC14 cytosolic factor OS=Ashbya gossypii (strain ATCC 10895 / CBS 109.51 / FGSC 9923 / NRRL Y-1056) OX=284811 GN=SEC14 PE=3 SV=2 && PF03765:CRAL/TRIO, N-terminal domain|PF00650:CRAL/TRIO domain	Trihelix
123123954	0	0	0	39.5169	28.8348	26.2615	0	31.5377	-7.43324	2.87e-08	2.4e-06	LOC123123954	NC_057808.1	565260875	565263916	-	2285	protein_coding	cysteine-rich receptor-like protein kinase 10 && sp|Q8W4G6|CRK15_ARATH Cysteine-rich receptor-like protein kinase 15 OS=Arabidopsis thaliana OX=3702 GN=CRK15 PE=2 SV=2 && PF07714:Protein tyrosine kinase|PF01657:Salt stress response/antifungal	MYB_related
123190826	3.16785	7.47781	1.97528	54.7157	49.7151	45.0197	4.20698	49.8169	-3.54891	2.89e-08	2.42e-06	LOC123190826	NC_057797.1	748341631	748348150	+	4346	protein_coding	ABC transporter B family member 19-like && sp|Q9LJX0|AB19B_ARATH ABC transporter B family member 19 OS=Arabidopsis thaliana OX=3702 GN=ABCB19 PE=1 SV=1 && PF00005:ABC transporter|PF00664:ABC transporter transmembrane region	ERF
123043784	223.862	254.245	213.33	537.025	531.952	560.871	230.479	543.282	-1.2367	2.92e-08	2.44e-06	LOC123043784	NC_057798.1	112397687	112405296	-	3998	lncRNA	uncharacterized LOC123043784%2C transcript variant X4 && - && -	NF-YA
123176242	128.826	216.856	144.195	552.224	405.675	564.623	163.293	507.507	-1.6346	2.93e-08	2.45e-06	LOC123176242	NW_025234825.1	753	2563	-	1811	rRNA	18S ribosomal RNA && - && -	-
123070260	74.9725	128.992	80.9863	327.281	344.029	264.491	94.9837	311.934	-1.71293	2.94e-08	2.45e-06	LOC123070260	NC_057801.1	441858283	441861033	-	2343	lncRNA	uncharacterized LOC123070260%2C transcript variant X2 && - && -	-
123104987	2408.62	2573.3	2406.87	1273.66	956.519	925.719	2462.93	1051.97	1.22745	2.97e-08	2.47e-06	LOC123104987	NC_057806.1	582691450	582694851	-	1867	protein_coding	ATP sulfurylase 4%2C chloroplastic-like && sp|Q9S7D8|APS4_ARATH ATP sulfurylase 4, chloroplastic OS=Arabidopsis thaliana OX=3702 GN=APS4 PE=2 SV=1 && PF14306:PUA-like domain|PF01747:ATP-sulfurylase	-
543261	443.499	228.073	271.601	83.0868	101.419	60.0263	314.391	81.5107	1.94769	3e-08	2.5e-06	LOC543261	NC_057794.1	502052636	502056257	-	1840	protein_coding	tubulin beta-5 chain-like && sp|Q9ZRA8|TBB5_WHEAT Tubulin beta-5 chain OS=Triticum aestivum OX=4565 GN=TUBB5 PE=2 SV=1 && PF03953:Tubulin C-terminal domain|PF00091:Tubulin/FtsZ family, GTPase domain	NAC
123105739	398.094	198.162	920.479	66.8748	110.368	62.8401	505.578	80.0275	2.65958	3.01e-08	2.5e-06	LOC123105739	NC_057806.1	660173995	660175566	-	1488	protein_coding	GEM-like protein 5 && sp|Q9LYV6|GEML5_ARATH GEM-like protein 5 OS=Arabidopsis thaliana OX=3702 GN=At5g13200 PE=1 SV=1 && PF02893:GRAM domain	MYB
123110685	88.6999	169.185	183.701	35.4639	27.8405	33.7648	147.195	32.3564	2.18666	3.03e-08	2.52e-06	LOC123110685	NC_057807.1	111821698	111825737	-	1887	protein_coding	protein rough sheath 2-like && sp|Q9S7B2|RS2_MAIZE Protein rough sheath 2 OS=Zea mays OX=4577 GN=RS2 PE=1 SV=1 && PF13921:Myb-like DNA-binding domain	MYB
123167845	9.50356	2.80418	3.95055	88.1531	68.6069	33.7648	5.41943	63.5083	-3.5675	3.09e-08	2.56e-06	LOC123167845	NC_057814.1	243856554	243859531	+	1958	protein_coding	ACT domain-containing protein ACR4-like && sp|Q8LJW3|ACR4_ARATH ACT domain-containing protein ACR4 OS=Arabidopsis thaliana OX=3702 GN=ACR4 PE=2 SV=1 && PF01842:ACT domain	TCP
123104934	4900.67	4444.62	7080.38	2097.44	2320.7	1895.52	5475.22	2104.55	1.37943	3.09e-08	2.56e-06	LOC123104934	NC_057806.1	576575886	576580572	-	2762	protein_coding	organic cation/carnitine transporter 7-like%2C transcript variant X2 && sp|Q940M4|OCT7_ARATH Organic cation/carnitine transporter 7 OS=Arabidopsis thaliana OX=3702 GN=OCT7 PE=2 SV=1 && PF07690:Major Facilitator Superfamily	-
123144057	475.178	284.157	383.204	962.591	1033.08	1043.9	380.846	1013.19	-1.41245	3.1e-08	2.57e-06	LOC123144057	NC_057811.1	127246070	127251487	-	1998	protein_coding	probable protein phosphatase 2C 11%2C transcript variant X1 && sp|Q6ETK3|P2C11_ORYSJ Probable protein phosphatase 2C 11 OS=Oryza sativa subsp. japonica OX=39947 GN=Os02g0180000 PE=2 SV=1 && -	NAC
123182400	224.918	380.433	171.849	39.5169	62.641	73.1571	259.067	58.4383	2.1475	3.11e-08	2.58e-06	LOC123182400	NC_057796.1	404453002	404458959	-	2150	protein_coding	protein DETOXIFICATION 42-like%2C transcript variant X1 && sp|Q9SYD6|DTX42_ARATH Protein DETOXIFICATION 42 OS=Arabidopsis thaliana OX=3702 GN=DTX42 PE=2 SV=2 && PF01554:MatE	-
123089625	32.7345	20.564	173.824	0	0	0.937911	75.7076	0.312637	7.75049	3.15e-08	2.6e-06	LOC123089625	NC_057795.1	218774779	218783721	-	2283	protein_coding	S-type anion channel SLAH2-like && sp|Q9FLV9|SLAH3_ARATH S-type anion channel SLAH3 OS=Arabidopsis thaliana OX=3702 GN=SLAH3 PE=1 SV=1 && PF03595:Voltage-dependent anion channel	GRF
123132423	1317.83	714.131	4040.43	342.48	277.41	337.648	2024.13	319.179	2.66483	3.19e-08	2.63e-06	LOC123132423	NC_057809.1	119400833	119402966	-	1734	protein_coding	4-hydroxyphenylpyruvate dioxygenase-like && sp|O48604|HPPD_HORVU 4-hydroxyphenylpyruvate dioxygenase OS=Hordeum vulgare OX=4513 PE=2 SV=1 && -	G2-like
123099463	157.337	61.6919	93.8256	1.01325	3.97721	17.8203	104.285	7.60359	3.76206	3.26e-08	2.69e-06	LOC123099463	NC_057805.1	20093103	20094185	-	715	protein_coding	chemocyanin-like && sp|P60496|BABL_LILLO Chemocyanin OS=Lilium longiflorum OX=4690 PE=1 SV=1 && PF02298:Plastocyanin-like domain	MYB
123163916	510.024	293.504	509.621	130.71	148.151	141.625	437.717	140.162	1.64229	3.27e-08	2.69e-06	LOC123163916	NC_057814.1	118939902	118947946	-	1826	protein_coding	choline/ethanolaminephosphotransferase 1-like%2C transcript variant X1 && sp|O82567|AAPT1_ARATH Choline/ethanolaminephosphotransferase 1 OS=Arabidopsis thaliana OX=3702 GN=AAPT1 PE=1 SV=1 && PF01066:CDP-alcohol phosphatidyltransferase	G2-like
123130089	51.7416	40.1932	117.529	5.06627	4.97151	9.37911	69.8213	6.4723	3.4248	3.28e-08	2.7e-06	LOC123130089	NC_057809.1	24611137	24612026	+	890	protein_coding	heavy metal-associated isoprenylated plant protein 27-like && sp|Q67ZW1|HIP27_ARATH Heavy metal-associated isoprenylated plant protein 27 OS=Arabidopsis thaliana OX=3702 GN=HIPP27 PE=1 SV=1 && PF00403:Heavy-metal-associated domain	MIKC_MADS
123136082	864.824	396.324	288.39	2909.05	2071.13	1773.59	516.513	2251.26	-2.12433	3.34e-08	2.75e-06	LOC123136082	NC_057810.1	123589913	123590907	+	995	protein_coding	chlorophyll a-b binding protein of LHCII type 1-like && sp|P04784|CB21_WHEAT Chlorophyll a-b binding protein, chloroplastic OS=Triticum aestivum OX=4565 GN=WHAB1.6 PE=3 SV=1 && PF00504:Chlorophyll A-B binding protein	ERF
123097809	87.6439	98.1462	95.8009	18.2386	18.8917	26.2615	93.8637	21.1306	2.14869	3.39e-08	2.78e-06	LOC123097809	NC_057805.1	343503572	343507193	-	1769	protein_coding	DDB1- and CUL4-associated factor 8-like && sp|Q6NRH1|DCAF8_XENLA DDB1- and CUL4-associated factor 8 OS=Xenopus laevis OX=8355 GN=dcaf8 PE=2 SV=1 && PF00400:WD domain, G-beta repeat	-
123152478	0	0	0	42.5567	14.9145	45.9577	0	34.4763	-7.56302	3.47e-08	2.85e-06	LOC123152478	NC_057812.1	38915031	38921126	+	4750	protein_coding	probable potassium transporter 4 && sp|Q6YSA9|HAK4_ORYSJ Probable potassium transporter 4 OS=Oryza sativa subsp. japonica OX=39947 GN=HAK4 PE=2 SV=1 && PF02705:K+ potassium transporter	C3H
123145260	817.306	907.619	860.233	413.408	372.863	386.419	861.719	390.897	1.14061	3.5e-08	2.86e-06	LOC123145260	NC_057811.1	384501729	384508149	+	3458	protein_coding	heat shock 70 kDa protein 17-like && sp|F4JMJ1|HSP7R_ARATH Heat shock 70 kDa protein 17 OS=Arabidopsis thaliana OX=3702 GN=HSP70-17 PE=2 SV=1 && PF00012:Hsp70 protein	LBD
123096213	26.3988	37.389	50.3695	182.386	131.248	143.5	38.0525	152.378	-1.99896	3.57e-08	2.92e-06	LOC123096213	NC_057805.1	62332204	62335174	+	2942	protein_coding	zinc-finger homeodomain protein 4-like%2C transcript variant X3 && sp|Q53N87|ZHD4_ORYSJ Zinc-finger homeodomain protein 4 OS=Oryza sativa subsp. japonica OX=39947 GN=ZHD4 PE=2 SV=2 && PF04770:ZF-HD protein dimerisation region	ZF-HD
123147896	1071.79	901.076	1525.9	405.302	458.373	418.308	1166.26	427.328	1.44842	3.64e-08	2.98e-06	LOC123147896	NC_057812.1	512012465	512019712	-	1545	protein_coding	polyadenylate-binding protein-interacting protein 8-like && sp|Q9LPI5|CID11_ARATH Polyadenylate-binding protein-interacting protein 11 OS=Arabidopsis thaliana OX=3702 GN=CID11 PE=2 SV=1 && PF00076:RNA recognition motif. (a.k.a. RRM, RBD, or RNP domain)	NAC
123069344	1640.95	718.804	3184.15	363.758	295.308	419.246	1847.97	359.437	2.36198	3.65e-08	2.98e-06	LOC123069344	NC_057801.1	199097273	199100482	+	1934	protein_coding	cytochrome P450 71A1-like && sp|P37118|C71A2_SOLME Cytochrome P450 71A2 OS=Solanum melongena OX=4111 GN=CYP71A2 PE=2 SV=1 && PF00067:Cytochrome P450	E2F/DP
123076922	197.463	200.031	98.7638	33.4374	29.8291	45.9577	165.419	36.408	2.18199	3.68e-08	3e-06	LOC123076922	NC_057802.1	16040833	16043103	+	1892	protein_coding	calmodulin-binding protein 60 B-like && sp|Q9FKL6|CB60B_ARATH Calmodulin-binding protein 60 B OS=Arabidopsis thaliana OX=3702 GN=CBP60B PE=2 SV=1 && PF07887:Calmodulin binding protein-like	GATA
123069122	2724.35	862.752	1030.11	175.293	199.855	435.191	1539.07	270.113	2.50978	3.72e-08	3.03e-06	LOC123069122	NC_057801.1	154849182	154850134	+	851	protein_coding	glycine-rich cell wall structural protein-like && - && -	-
123167266	29487.4	15808.1	9942.55	5477.65	3736.59	2030.58	18412.7	3748.27	2.29643	3.75e-08	3.05e-06	LOC123167266	NC_057814.1	29691251	29693926	-	1316	protein_coding	acid phosphatase 1-like%2C transcript variant X1 && sp|P27061|PPA1_SOLLC Acid phosphatase 1 OS=Solanum lycopersicum OX=4081 GN=APS1 PE=2 SV=1 && PF03767:HAD superfamily, subfamily IIIB (Acid phosphatase)	MYB
123103505	121.434	49.5405	341.723	4.05302	19.886	16.8824	170.899	13.6072	3.64783	3.8e-08	3.09e-06	LOC123103505	NC_057806.1	383612488	383613953	+	1466	protein_coding	probable protein phosphatase 2C 68 && sp|Q0J2L7|P2C68_ORYSJ Probable protein phosphatase 2C 68 OS=Oryza sativa subsp. japonica OX=39947 GN=Os09g0325700 PE=2 SV=2 && PF00481:Protein phosphatase 2C	NAC
123190054	251.316	391.65	416.783	60.7953	119.316	35.6406	353.25	71.9174	2.29787	3.81e-08	3.1e-06	LOC123190054	NC_057797.1	663285924	663295698	+	3606	protein_coding	uncharacterized LOC123190054%2C transcript variant X1 && sp|Q5DQR4|STB5L_MOUSE Syntaxin-binding protein 5-like OS=Mus musculus OX=10090 GN=Stxbp5l PE=1 SV=1 && PF08596:Lethal giant larvae(Lgl) like, C-terminal	-
123059835	532.199	713.196	674.557	2376.08	1278.67	1984.62	639.984	1879.79	-1.55423	3.83e-08	3.11e-06	LOC123059835	NC_057800.1	13013121	13018757	-	3801	protein_coding	glycine-rich domain-containing protein 1-like && sp|Q9SZJ2|GRDP2_ARATH Glycine-rich domain-containing protein 2 OS=Arabidopsis thaliana OX=3702 GN=GRDP2 PE=2 SV=1 && PF07173:Glycine-rich domain-containing protein-like	GRAS
123135087	15.8393	18.6945	15.8022	98.2857	84.5157	67.5296	16.7787	83.4437	-2.31151	3.89e-08	3.15e-06	LOC123135087	NC_057795.1	504152667	504154736	+	2070	protein_coding	cytochrome P450 94C1-like && sp|Q9ZUX1|C94C1_ARATH Cytochrome P450 94C1 OS=Arabidopsis thaliana OX=3702 GN=CYP94C1 PE=1 SV=1 && PF00067:Cytochrome P450	C2H2
123139892	173.176	155.165	113.578	46.6097	16.9031	24.3857	147.306	29.2995	2.33198	3.92e-08	3.18e-06	LOC123139892	NC_057810.1	712046672	712051935	-	2619	protein_coding	P-loop NTPase domain-containing protein LPA1-like && sp|B9F4I8|LPA1_ORYSJ P-loop NTPase domain-containing protein LPA1 OS=Oryza sativa subsp. japonica OX=39947 GN=LPA1 PE=2 SV=1 && PF13671:AAA domain	-
543070	2356.88	1535.75	2534.28	539.051	610.502	923.843	2142.31	691.132	1.6318	3.93e-08	3.18e-06	LOC543070	NC_057811.1	310724217	310725295	-	974	protein_coding	temperature-induced lipocalin-1 && sp|Q9FGT8|TIL_ARATH Temperature-induced lipocalin-1 OS=Arabidopsis thaliana OX=3702 GN=TIL PE=1 SV=1 && PF08212:Lipocalin-like domain	FAR1
100127082	1020.05	515.034	490.856	166.174	160.083	227.912	675.313	184.723	1.86932	3.95e-08	3.19e-06	LOC100127082	NC_057808.1	342333962	342337991	+	1334	protein_coding	cinnamoyl-CoA reductase 1 && sp|A0A059TC02|CCR1_PETHY Cinnamoyl-CoA reductase 1 OS=Petunia hybrida OX=4102 GN=CCR1 PE=1 SV=1 && PF01370:NAD dependent epimerase/dehydratase family	ERF
123125947	119.322	35.5196	89.8751	9.11929	10.9373	8.4412	81.5724	9.49927	3.10125	3.97e-08	3.21e-06	LOC123125947	NC_057794.1	339491181	339492650	+	901	protein_coding	glutathione S-transferase U17-like && sp|Q9FUS8|GSTUH_ARATH Glutathione S-transferase U17 OS=Arabidopsis thaliana OX=3702 GN=GSTU17 PE=2 SV=1 && PF02798:Glutathione S-transferase, N-terminal domain|PF00043:Glutathione S-transferase, C-terminal domain	-
123150460	587.109	137.405	3765.86	2.02651	7.95442	15.0066	1496.79	8.32917	7.48701	4.01e-08	3.23e-06	LOC123150460	NC_057812.1	201250417	201260242	-	1247	protein_coding	epoxide hydrolase A-like && sp|I6YGS0|EPHA_MYCTU Epoxide hydrolase A OS=Mycobacterium tuberculosis (strain ATCC 25618 / H37Rv) OX=83332 GN=ephA PE=1 SV=1 && PF00561:alpha/beta hydrolase fold	FAR1
123150467	670.529	1000.16	788.135	356.665	276.416	223.223	819.607	285.435	1.52254	4.04e-08	3.25e-06	LOC123150467	NC_057812.1	88656841	88659679	+	1848	protein_coding	protein DETOXIFICATION 35-like && sp|F4JTB3|DTX35_ARATH Protein DETOXIFICATION 35 OS=Arabidopsis thaliana OX=3702 GN=DTX35 PE=1 SV=1 && PF01554:MatE	ERF
123166700	14.7833	13.0862	11.8517	65.8615	60.6524	149.128	13.2404	91.8806	-2.79758	4.07e-08	3.28e-06	LOC123166700	NC_057814.1	565496092	565499772	-	1067	protein_coding	carbonic anhydrase%2C chloroplastic-like && sp|P40880|CAHC_HORVU Carbonic anhydrase, chloroplastic OS=Hordeum vulgare OX=4513 PE=2 SV=1 && PF00484:Carbonic anhydrase	bHLH
123120670	73.9166	61.6919	170.861	14.1856	12.9259	16.8824	102.157	14.6646	2.79891	4.12e-08	3.31e-06	LOC123120670	NC_057808.1	379161789	379167322	-	1737	protein_coding	lysine-specific demethylase JMJ30-like && sp|Q8RWR1|JMJ30_ARATH Lysine-specific demethylase JMJ30 OS=Arabidopsis thaliana OX=3702 GN=JMJ30 PE=1 SV=1 && PF13621:Cupin-like domain	NAC
123104461	0	0	1.97528	52.6892	62.641	39.3923	0.658425	51.5742	-6.28704	4.16e-08	3.34e-06	LOC123104461	NC_057806.1	522783742	522786242	-	2082	protein_coding	SPX domain-containing membrane protein OsI_32082-like && sp|B8BDK8|SPXM4_ORYSI SPX domain-containing membrane protein OsI_32082 OS=Oryza sativa subsp. indica OX=39946 GN=OsI_32082 PE=3 SV=2 && PF07690:Major Facilitator Superfamily	C3H
123042986	551.206	161.708	422.709	0	2.98291	10.317	378.541	4.43331	6.40656	4.17e-08	3.35e-06	LOC123042986	NC_057798.1	809991261	809992701	+	1357	lncRNA	uncharacterized LOC123042986 && - && -	-
123077795	514.248	568.313	471.103	1065.94	1159.36	1254.93	517.888	1160.08	-1.16343	4.19e-08	3.36e-06	LOC123077795	NC_057802.1	122251062	122254033	+	1816	protein_coding	uncharacterized LOC123077795%2C transcript variant X1 && - && PF02902:Ulp1 protease family, C-terminal catalytic domain	FAR1
123123760	4811.97	4254.87	3579.2	1824.87	889.901	1446.26	4215.35	1387.01	1.60368	4.22e-08	3.37e-06	LOC123123760	NC_057808.1	550398710	550400348	+	961	protein_coding	probable thiol methyltransferase 2 && sp|Q6AWU6|HOL3_ARATH Probable thiol methyltransferase 2 OS=Arabidopsis thaliana OX=3702 GN=HOL3 PE=1 SV=1 && PF05724:Thiopurine S-methyltransferase (TPMT)	-
123159986	158.393	73.8434	498.757	33.4374	23.8633	26.2615	243.664	27.8541	3.1293	4.25e-08	3.4e-06	LOC123159986	NC_057813.1	138501471	138506524	-	3172	protein_coding	potassium transporter 24-like && sp|Q5Z6K9|HAK24_ORYSJ Potassium transporter 24 OS=Oryza sativa subsp. japonica OX=39947 GN=HAK24 PE=3 SV=1 && PF02705:K+ potassium transporter	NF-X1
123054777	838.425	893.598	561.966	273.579	276.416	303.883	764.663	284.626	1.42563	4.26e-08	3.4e-06	LOC123054777	NC_057799.1	591765623	591768520	+	1782	protein_coding	adenosylhomocysteinase-like && sp|P32112|SAHH_WHEAT Adenosylhomocysteinase OS=Triticum aestivum OX=4565 GN=SAHH PE=2 SV=1 && PF05221:S-adenosyl-L-homocysteine hydrolase|PF00670:S-adenosyl-L-homocysteine hydrolase, NAD binding domain	bHLH
123086842	238.645	109.363	112.591	451.911	647.291	634.028	153.533	577.743	-1.91382	4.32e-08	3.44e-06	LOC123086842	NC_057803.1	543932818	543934959	+	1149	protein_coding	LOB domain-containing protein 39-like && sp|Q9FN11|LBD37_ARATH LOB domain-containing protein 37 OS=Arabidopsis thaliana OX=3702 GN=LBD37 PE=2 SV=1 && PF03195:Lateral organ boundaries (LOB) domain	LBD
novel.2070	496.297	139.274	466.165	28.3711	55.6809	85.3499	367.245	56.4673	2.69902	4.33e-08	3.45e-06	-	NC_057806.1	341918995	341919862	-	761	-	- && - && -	-
123098154	110.875	67.3003	114.566	15.1988	24.8576	15.9445	97.5804	18.667	2.38579	4.34e-08	3.45e-06	LOC123098154	NC_057805.1	396333878	396340194	+	1992	protein_coding	cytochrome P450 90B2-like && sp|Q5CCK3|C90B2_ORYSJ Cytochrome P450 90B2 OS=Oryza sativa subsp. japonica OX=39947 GN=CYP90B2 PE=1 SV=1 && PF00067:Cytochrome P450	GATA
novel.1800	31.6785	81.3212	67.1594	237.101	230.678	241.043	60.053	236.274	-1.97211	4.36e-08	3.46e-06	-	NC_057804.1	187892163	187900968	-	7321	-	- && - && -	-
123152469	174.232	48.6058	10.864	1.01325	0	0	77.9006	0.337751	7.7903	4.38e-08	3.48e-06	LOC123152469	NC_057812.1	29523884	29526558	-	1402	protein_coding	uncharacterized LOC123152469 && - && PF03018:Dirigent-like protein	NAC
123067098	154.169	159.838	374.315	20.2651	60.6524	30.9511	229.441	37.2895	2.62144	4.43e-08	3.52e-06	LOC123067098	NC_057794.1	553788757	553793778	+	2775	protein_coding	protein DETOXIFICATION 14-like%2C transcript variant X2 && sp|Q8VYL8|DTX10_ARATH Protein DETOXIFICATION 10 OS=Arabidopsis thaliana OX=3702 GN=DTX10 PE=2 SV=1 && PF01554:MatE	B3
123045781	117.211	37.389	33.5797	0	0	1.87582	62.7264	0.625274	6.59205	4.46e-08	3.54e-06	LOC123045781	NC_057798.1	520919761	520921927	+	1719	protein_coding	BTB/POZ and TAZ domain-containing protein 2-like && sp|Q94BN0|BT2_ARATH BTB/POZ and TAZ domain-containing protein 2 OS=Arabidopsis thaliana OX=3702 GN=BT2 PE=1 SV=1 && PF00651:BTB/POZ domain|PF02135:TAZ zinc finger	C2H2
123161005	1155.21	1268.42	1161.46	3579.83	3018.7	2268.81	1195.03	2955.78	-1.30637	4.5e-08	3.57e-06	LOC123161005	NC_057813.1	468441165	468444701	+	1984	protein_coding	probable transcription factor GLK1%2C transcript variant X1 && sp|Q5Z5I4|GLK1_ORYSJ Probable transcription factor GLK1 OS=Oryza sativa subsp. japonica OX=39947 GN=GLK1 PE=2 SV=1 && PF00249:Myb-like DNA-binding domain	G2-like
123152050	183.735	119.645	87.8998	28.3711	31.8177	23.4478	130.427	27.8789	2.22608	4.52e-08	3.57e-06	LOC123152050	NC_057812.1	129080173	129084191	+	1656	protein_coding	phosphoserine phosphatase%2C chloroplastic-like%2C transcript variant X1 && sp|O82796|SERC_ARATH Phosphoserine phosphatase, chloroplastic OS=Arabidopsis thaliana OX=3702 GN=PSP PE=1 SV=2 && PF12710:haloacid dehalogenase-like hydrolase	-
123090823	758.173	841.253	922.454	352.612	401.698	347.027	840.627	367.113	1.19544	4.6e-08	3.64e-06	LOC123090823	NC_057804.1	33590547	33593789	+	2172	protein_coding	uncharacterized LOC123090823 && - && PF00892:EamA-like transporter family	GRAS
123137937	295.666	160.773	295.304	60.7953	71.5898	76.9087	250.581	69.7646	1.84328	4.6e-08	3.64e-06	LOC123137937	NC_057810.1	548747095	548753017	-	900	protein_coding	universal stress protein A-like protein && sp|Q8LGG8|USPAL_ARATH Universal stress protein A-like protein OS=Arabidopsis thaliana OX=3702 GN=At3g01520 PE=1 SV=2 && PF00582:Universal stress protein family	-
123041501	10.5595	12.1514	14.8146	52.6892	78.5499	94.729	12.5085	75.3227	-2.58944	4.67e-08	3.68e-06	LOC123041501	NC_057798.1	502374626	502376035	+	1410	protein_coding	uncharacterized LOC123041501 && - && -	-
123187211	1273.48	441.191	961.96	180.359	280.393	149.128	892.209	203.293	2.13381	4.71e-08	3.71e-06	LOC123187211	NC_057797.1	33761293	33762391	+	928	protein_coding	heavy metal-associated isoprenylated plant protein 27-like && sp|Q9SZN7|HIP26_ARATH Heavy metal-associated isoprenylated plant protein 26 OS=Arabidopsis thaliana OX=3702 GN=HIPP26 PE=1 SV=1 && PF00403:Heavy-metal-associated domain	MIKC_MADS
123105607	544.871	433.713	489.869	1783.33	1425.83	972.614	489.484	1393.92	-1.50992	4.71e-08	3.71e-06	LOC123105607	NC_057806.1	647697327	647699643	+	946	protein_coding	50S ribosomal protein L17%2C chloroplastic-like && sp|O80363|RK17_TOBAC 50S ribosomal protein L17, chloroplastic OS=Nicotiana tabacum OX=4097 GN=RPL17 PE=2 SV=1 && PF01196:Ribosomal protein L17	-
123071657	731.774	480.449	533.325	1635.39	1318.44	1494.09	581.849	1482.64	-1.34994	4.73e-08	3.72e-06	LOC123071657	NC_057801.1	676762521	676773422	+	2547	protein_coding	uncharacterized protein slr0889-like%2C transcript variant X1 && sp|Q9W133|ADCK_DROME AarF domain-containing kinase 1 OS=Drosophila melanogaster OX=7227 GN=Adck1 PE=1 SV=2 && -	B3
123048722	0	0	0	38.5037	30.8234	21.572	0	30.2997	-7.37514	4.74e-08	3.72e-06	LOC123048722	NC_057799.1	63261289	63262852	-	1564	protein_coding	protein ASPARTIC PROTEASE IN GUARD CELL 1-like && - && PF14543:Xylanase inhibitor N-terminal|PF14541:Xylanase inhibitor C-terminal	NAC
123104561	189.015	168.251	195.552	61.8085	33.8063	60.0263	184.273	51.8804	1.82779	4.88e-08	3.83e-06	LOC123104561	NC_057806.1	535481663	535486398	-	1887	protein_coding	probable serine/threonine-protein kinase PBL19%2C transcript variant X1 && sp|Q9LTC0|PBL19_ARATH Probable serine/threonine-protein kinase PBL19 OS=Arabidopsis thaliana OX=3702 GN=PBL19 PE=1 SV=1 && PF07714:Protein tyrosine kinase	Whirly
123186350	6.33571	2.80418	0	44.5832	41.7607	59.0884	3.04663	48.4774	-4.01496	4.93e-08	3.87e-06	LOC123186350	NC_057797.1	742264418	742265158	+	741	protein_coding	uncharacterized LOC123186350 && - && -	-
123105489	152.057	173.859	250.86	672.801	507.094	508.348	192.259	562.748	-1.54892	4.98e-08	3.9e-06	LOC123105489	NC_057806.1	633303068	633309911	-	2648	protein_coding	putative chloride channel-like protein CLC-g && sp|P60300|CLCG_ARATH Putative chloride channel-like protein CLC-g OS=Arabidopsis thaliana OX=3702 GN=CLC-G PE=1 SV=2 && PF00654:Voltage gated chloride channel	-
123150617	912.342	1260.95	1807.38	3990.19	3452.22	4013.32	1326.89	3818.58	-1.52487	5e-08	3.91e-06	LOC123150617	NC_057812.1	74431367	74433936	-	1373	protein_coding	GDSL esterase/lipase At5g45910-like && sp|Q9FJ45|GDL83_ARATH GDSL esterase/lipase At5g45910 OS=Arabidopsis thaliana OX=3702 GN=At5g45910 PE=2 SV=1 && PF00657:GDSL-like Lipase/Acylhydrolase	B3
123151055	19053.6	17084.9	17265.9	9472.91	7882.83	7393.56	17801.5	8249.77	1.10958	5.02e-08	3.92e-06	LOC123151055	NC_057812.1	223828720	223831876	-	1672	protein_coding	serine--glyoxylate aminotransferase-like && sp|Q56YA5|SGAT_ARATH Serine--glyoxylate aminotransferase OS=Arabidopsis thaliana OX=3702 GN=AGT1 PE=1 SV=2 && PF00266:Aminotransferase class-V	-
novel.106	0	4.67363	4.93819	117.537	25.8519	53.4609	3.20394	65.6168	-4.33324	5.05e-08	3.94e-06	-	NC_057794.1	571858989	571860601	+	719	-	- && sp|Q6NNN0|RADL3_ARATH Protein RADIALIS-like 3 OS=Arabidopsis thaliana OX=3702 GN=RL3 PE=2 SV=1 && -	MYB_related
novel.2409	137.274	145.817	127.405	32.4241	37.7835	46.8956	136.832	39.0344	1.80772	5.15e-08	4.02e-06	-	NC_057809.1	125293339	125296865	+	3527	-	- && - && -	-
123062399	51.7416	45.8016	58.2707	156.041	172.014	159.445	51.9379	162.5	-1.64635	5.21e-08	4.06e-06	LOC123062399	NC_057800.1	585857026	585861198	-	1329	protein_coding	NADH--cytochrome b5 reductase 1-like && sp|Q9ZNT1|NB5R1_ARATH NADH--cytochrome b5 reductase 1 OS=Arabidopsis thaliana OX=3702 GN=CBR1 PE=1 SV=1 && PF00970:Oxidoreductase FAD-binding domain|PF00175:Oxidoreductase NAD-binding domain	C3H
123046142	205.91	147.687	257.774	549.184	638.342	543.051	203.79	576.859	-1.50174	5.23e-08	4.07e-06	LOC123046142	NC_057798.1	579151442	579159250	-	5021	protein_coding	uncharacterized LOC123046142%2C transcript variant X11 && - && -	-
123132078	1499.45	1343.2	1381.71	679.894	640.331	686.551	1408.12	668.925	1.07374	5.23e-08	4.07e-06	LOC123132078	NC_057809.1	67134481	67139648	+	2392	protein_coding	phosphatidylinositol/phosphatidylcholine transfer protein SFH6-like%2C transcript variant X2 && sp|F4IHJ0|SFH8_ARATH Phosphatidylinositol/phosphatidylcholine transfer protein SFH8 OS=Arabidopsis thaliana OX=3702 GN=SFH8 PE=2 SV=1 && PF03765:CRAL/TRIO, N-terminal domain|PF00650:CRAL/TRIO domain	bHLH
123150992	107.707	34.5849	279.502	10.1325	13.9202	14.0687	140.598	12.7071	3.4664	5.26e-08	4.08e-06	LOC123150992	NC_057812.1	162690680	162694350	+	1735	protein_coding	pyruvate dehydrogenase E1 component subunit alpha-2%2C mitochondrial && sp|Q654V6|ODPA2_ORYSJ Pyruvate dehydrogenase E1 component subunit alpha-2, mitochondrial OS=Oryza sativa subsp. japonica OX=39947 GN=Os06g0246500 PE=2 SV=1 && PF00676:Dehydrogenase E1 component	E2F/DP
123103198	1290.37	1002.96	2216.26	306.003	311.217	558.995	1503.2	392.072	1.93844	5.27e-08	4.09e-06	LOC123103198	NC_057806.1	329156816	329160569	-	2474	protein_coding	F-box/LRR-repeat protein 3-like && sp|Q8RWU5|FBL3_ARATH F-box/LRR-repeat protein 3 OS=Arabidopsis thaliana OX=3702 GN=FBL3 PE=2 SV=1 && -	WRKY
123087672	1088.69	1274.03	1307.63	553.237	506.1	591.822	1223.45	550.386	1.15245	5.29e-08	4.1e-06	LOC123087672	NC_057803.1	622342220	622344991	+	1473	protein_coding	uncharacterized LOC123087672 && - && PF03168:Late embryogenesis abundant protein	NAC
123085417	764.508	516.903	944.182	225.956	225.707	292.628	741.865	248.097	1.57968	5.33e-08	4.12e-06	LOC123085417	NC_057803.1	102801462	102806776	+	2354	protein_coding	uncharacterized LOC123085417 && - && PF04646:Protein of unknown function, DUF604	C2H2
123111270	114.043	175.728	134.319	393.143	352.977	438.943	141.363	395.021	-1.48108	5.39e-08	4.17e-06	LOC123111270	NC_057807.1	260252655	260255290	+	1691	lncRNA	uncharacterized LOC123111270 && - && -	-
123146193	51.7416	40.1932	109.628	3.03976	9.94302	5.62747	67.1876	6.20342	3.43597	5.42e-08	4.19e-06	LOC123146193	NC_057811.1	482839885	482845123	-	2595	protein_coding	P-loop NTPase domain-containing protein LPA1-like && sp|B9F4I8|LPA1_ORYSJ P-loop NTPase domain-containing protein LPA1 OS=Oryza sativa subsp. japonica OX=39947 GN=LPA1 PE=2 SV=1 && PF13671:AAA domain	-
123056164	162.616	161.708	211.355	41.5434	63.6353	53.4609	178.56	52.8799	1.75514	5.42e-08	4.19e-06	LOC123056164	NC_057794.1	457568175	457572627	-	1910	protein_coding	MLO-like protein 1 && sp|O49621|MLO1_ARATH MLO-like protein 1 OS=Arabidopsis thaliana OX=3702 GN=MLO1 PE=1 SV=1 && PF03094:Mlo family	ARF
123077527	343.184	189.749	249.872	87.1399	78.5499	63.778	260.935	76.4892	1.77038	5.43e-08	4.19e-06	LOC123077527	NC_057802.1	76008995	76010713	+	1719	protein_coding	UDP-glycosyltransferase 75C1-like && sp|F8WKW0|UGT1_GARJA Crocetin glucosyltransferase, chloroplastic OS=Gardenia jasminoides OX=114476 GN=UGT75L6 PE=1 SV=1 && PF00201:UDP-glucoronosyl and UDP-glucosyl transferase	ERF
123144103	557.542	440.256	665.668	170.227	210.792	226.975	554.489	202.664	1.45143	5.43e-08	4.19e-06	LOC123144103	NC_057811.1	132415354	132420683	-	2060	protein_coding	4-coumarate--CoA ligase 3-like && sp|Q6ETN3|4CL3_ORYSJ 4-coumarate--CoA ligase 3 OS=Oryza sativa subsp. japonica OX=39947 GN=4CL3 PE=1 SV=1 && PF00501:AMP-binding enzyme|PF13193:AMP-binding enzyme C-terminal domain	C2H2
123071865	1521.63	1199.25	1209.86	2717.55	3014.72	2912.21	1310.25	2881.5	-1.13717	5.52e-08	4.25e-06	LOC123071865	NC_057801.1	702595608	702599700	+	1725	protein_coding	BTB/POZ and TAZ domain-containing protein 2-like && sp|Q94BN0|BT2_ARATH BTB/POZ and TAZ domain-containing protein 2 OS=Arabidopsis thaliana OX=3702 GN=BT2 PE=1 SV=1 && PF02135:TAZ zinc finger|PF00651:BTB/POZ domain	C2H2
123069241	191.127	312.198	294.316	747.782	700.983	687.489	265.881	712.085	-1.42021	5.63e-08	4.32e-06	LOC123069241	NC_057801.1	178254801	178262749	-	2204	protein_coding	probable tRNA N6-adenosine threonylcarbamoyltransferase%2C mitochondrial%2C transcript variant X1 && sp|O22145|OSGP2_ARATH Probable tRNA N6-adenosine threonylcarbamoyltransferase, mitochondrial OS=Arabidopsis thaliana OX=3702 GN=GCP1 PE=2 SV=2 && -	NAC
123051018	293.554	258.919	263.699	1027.44	697.006	587.133	272.058	770.526	-1.50195	5.63e-08	4.32e-06	LOC123051018	NC_057799.1	8747212	8752849	-	2091	protein_coding	probable pectate lyase 8%2C transcript variant X1 && sp|Q9M8Z8|PLY8_ARATH Probable pectate lyase 8 OS=Arabidopsis thaliana OX=3702 GN=At3g07010 PE=2 SV=1 && PF00544:Pectate lyase	AP2
123058603	4408.6	2608.82	1809.35	9248.98	9936.06	9668.93	2942.26	9617.99	-1.70891	5.85e-08	4.49e-06	LOC123058603	NC_057794.1	480237220	480240066	-	1047	protein_coding	uncharacterized LOC123058603%2C transcript variant X3 && - && -	-
123147857	3167.85	1279.64	3513.03	653.549	639.336	822.548	2653.51	705.145	1.91174	5.86e-08	4.49e-06	LOC123147857	NC_057812.1	505823281	505828425	-	1206	protein_coding	reticulon-like protein B2 && sp|Q9SUT9|RTNLB_ARATH Reticulon-like protein B2 OS=Arabidopsis thaliana OX=3702 GN=RTNLB2 PE=1 SV=1 && PF02453:Reticulon	Dof
123113925	6875.3	4136.16	3883.39	1940.38	1762.9	1653.54	4964.95	1785.61	1.47533	5.87e-08	4.5e-06	LOC123113925	NC_057807.1	653969265	653974378	-	2068	protein_coding	probable methylenetetrahydrofolate reductase%2C transcript variant X1 && sp|Q75HE6|MTHR_ORYSJ Probable methylenetetrahydrofolate reductase OS=Oryza sativa subsp. japonica OX=39947 GN=Os03g0815200 PE=2 SV=1 && PF02219:Methylenetetrahydrofolate reductase	HD-ZIP
novel.482	47.5178	51.4099	47.4066	7.09278	5.96581	3.75165	48.7781	5.60341	3.12863	5.94e-08	4.54e-06	-	NC_057796.1	279441745	279443038	-	1166	-	- && - && -	MYB_related
123061001	2.1119	6.54308	10.864	104.365	54.6866	45.0197	6.50633	68.0239	-3.37563	5.96e-08	4.56e-06	LOC123061001	NC_057800.1	213212623	213219909	+	3514	protein_coding	kinesin-like protein KIN-14B%2C transcript variant X2 && sp|A2ZRG4|KN14B_ORYSJ Kinesin-like protein KIN-14B OS=Oryza sativa subsp. japonica OX=39947 GN=KIN14B PE=3 SV=2 && PF00225:Kinesin motor domain	bHLH
123123056	168.952	135.535	125.43	40.5302	44.7436	41.2681	143.306	42.1806	1.76377	5.98e-08	4.56e-06	LOC123123056	NC_057808.1	487079102	487080963	+	1746	protein_coding	uncharacterized LOC123123056%2C transcript variant X1 && - && -	-
123160674	383.31	163.577	551.102	85.1134	42.755	81.5983	365.996	69.8222	2.3895	6e-08	4.58e-06	LOC123160674	NC_057813.1	111029146	111031205	+	2060	protein_coding	UDP-glycosyltransferase 1-like && sp|Q9ZQ94|U73C5_ARATH UDP-glycosyltransferase 73C5 OS=Arabidopsis thaliana OX=3702 GN=UGT73C5 PE=2 SV=1 && PF00201:UDP-glucoronosyl and UDP-glucosyl transferase	ERF
123140706	72.8606	42.0627	34.5673	186.439	246.587	164.134	49.8302	199.053	-2.00145	6.01e-08	4.58e-06	LOC123140706	NC_057811.1	6485962	6486916	-	955	protein_coding	ribosome-inactivating protein-like && sp|P28522|RIPX_MAIZE Ribosome-inactivating protein OS=Zea mays OX=4577 PE=1 SV=1 && PF00161:Ribosome inactivating protein	-
123114430	313.617	288.83	221.231	85.1134	110.368	75.9708	274.56	90.4839	1.60182	6.16e-08	4.69e-06	LOC123114430	NC_057807.1	706796562	706801246	+	2042	protein_coding	beta-fructofuranosidase%2C insoluble isoenzyme 4-like%2C transcript variant X1 && sp|Q5JJV0|INV4_ORYSJ Beta-fructofuranosidase, insoluble isoenzyme 4 OS=Oryza sativa subsp. japonica OX=39947 GN=CIN4 PE=2 SV=1 && PF08244:Glycosyl hydrolases family 32 C terminal|PF00251:Glycosyl hydrolases family 32 N-terminal domain	-
123186939	343.184	152.36	384.191	66.8748	55.6809	83.4741	293.245	68.6766	2.09284	6.16e-08	4.69e-06	LOC123186939	NC_057797.1	5667060	5668806	+	1747	protein_coding	UDP-glycosyltransferase 88F5-like && sp|D3UAG6|U88F5_MALDO UDP-glycosyltransferase 88F5 OS=Malus domestica OX=3750 GN=UGT88F5 PE=2 SV=1 && PF00201:UDP-glucoronosyl and UDP-glucosyl transferase	bHLH
novel.3303	31.6785	38.3238	30.6168	93.2194	169.031	150.066	33.5397	137.439	-2.03384	6.17e-08	4.69e-06	-	NC_057814.1	360721217	360727648	-	3429	-	- && - && -	G2-like
123138716	276.659	540.272	559.991	136.789	127.271	148.19	458.974	137.417	1.74018	6.19e-08	4.7e-06	LOC123138716	NC_057810.1	658969916	658974898	+	1252	protein_coding	uncharacterized LOC123138716 && sp|Q8LPT3|MEBL_ARATH Membrane protein of ER body-like protein OS=Arabidopsis thaliana OX=3702 GN=MEBL PE=2 SV=1 && -	-
123180194	200.631	145.817	171.849	53.7025	54.6866	56.2747	172.766	54.8879	1.65316	6.21e-08	4.71e-06	LOC123180194	NC_057796.1	45785294	45789943	+	2069	protein_coding	UDP-glycosyltransferase 86A1-like%2C transcript variant X2 && sp|Q9SJL0|U86A1_ARATH UDP-glycosyltransferase 86A1 OS=Arabidopsis thaliana OX=3702 GN=UGT86A1 PE=2 SV=1 && PF00201:UDP-glucoronosyl and UDP-glucosyl transferase	GRAS
123103581	678.976	387.911	1033.07	139.829	158.094	227.912	699.986	175.279	1.99695	6.26e-08	4.74e-06	LOC123103581	NC_057806.1	394793166	394796362	-	1327	protein_coding	hypersensitive-induced response protein-like protein 2 && sp|Q6K550|HIRL2_ORYSJ Hypersensitive-induced response protein-like protein 2 OS=Oryza sativa subsp. japonica OX=39947 GN=HIRL2 PE=3 SV=1 && PF01145:SPFH domain / Band 7 family	-
123068775	1.05595	0	0.987638	96.2591	20.8803	60.0263	0.681196	59.0553	-6.47545	6.27e-08	4.74e-06	LOC123068775	NC_057794.1	571592145	571593217	+	581	protein_coding	protein RADIALIS-like 3 && sp|Q6NNN0|RADL3_ARATH Protein RADIALIS-like 3 OS=Arabidopsis thaliana OX=3702 GN=RL3 PE=2 SV=1 && PF00249:Myb-like DNA-binding domain	MYB_related
123138002	55.9654	28.0418	51.3572	1.01325	4.97151	0.937911	45.1215	2.30756	4.29545	6.28e-08	4.75e-06	LOC123138002	NC_057810.1	560515434	560516515	+	1082	protein_coding	uncharacterized LOC123138002 && - && -	-
123061716	239.701	85.9948	291.353	24.3181	37.7835	45.0197	205.683	35.7071	2.5238	6.36e-08	4.8e-06	LOC123061716	NC_057800.1	476360406	476363322	+	1513	protein_coding	ras-related protein RABA1f-like%2C transcript variant X1 && sp|Q9FJH0|RAA1F_ARATH Ras-related protein RABA1f OS=Arabidopsis thaliana OX=3702 GN=RABA1F PE=2 SV=1 && PF00071:Ras family	WOX
123121529	459.339	293.504	160.985	81.0603	70.5955	54.3989	304.609	68.6849	2.14925	6.4e-08	4.83e-06	LOC123121529	NC_057808.1	329389565	329391977	+	1894	protein_coding	trimethyltridecatetraene synthase-like && sp|A0A1D6F9Y9|C92C6_MAIZE Trimethyltridecatetraene synthase OS=Zea mays OX=4577 GN=CYP92C6 PE=1 SV=1 && PF00067:Cytochrome P450	bHLH
123112801	498.409	296.308	1723.43	130.71	133.237	116.301	839.382	126.749	2.72744	6.41e-08	4.84e-06	LOC123112801	NC_057807.1	505234033	505236122	+	1996	protein_coding	cytochrome P450 71A1-like && sp|O81970|C71A9_SOYBN Cytochrome P450 71A9 OS=Glycine max OX=3847 GN=CYP71A9 PE=2 SV=1 && PF00067:Cytochrome P450	E2F/DP
123090579	416.045	165.446	753.568	89.1664	65.624	86.2878	445.02	80.3594	2.46903	6.45e-08	4.86e-06	LOC123090579	NC_057804.1	13371503	13375112	-	1977	protein_coding	glucan endo-1%2C3-beta-glucosidase 8-like && sp|Q6NKW9|E138_ARATH Glucan endo-1,3-beta-glucosidase 8 OS=Arabidopsis thaliana OX=3702 GN=At1g64760 PE=2 SV=2 && PF07983:X8 domain|PF00332:Glycosyl hydrolases family 17	LBD
123145739	134.106	95.342	251.848	22.2916	16.9031	41.2681	160.432	26.8209	2.57695	6.56e-08	4.93e-06	LOC123145739	NC_057811.1	447342020	447344550	-	1660	protein_coding	serine/threonine-protein kinase RIPK-like && sp|Q9ZUF4|RIPK_ARATH Serine/threonine-protein kinase RIPK OS=Arabidopsis thaliana OX=3702 GN=RIPK PE=1 SV=1 && PF07714:Protein tyrosine kinase	Trihelix
123056814	258.708	205.64	253.823	95.2459	81.5328	75.9708	239.39	84.2498	1.50689	6.65e-08	5e-06	LOC123056814	NC_057794.1	463705120	463709785	+	1816	protein_coding	protein trichome berefringence-like 7 && sp|F4I037|TBL7_ARATH Protein trichome berefringence-like 7 OS=Arabidopsis thaliana OX=3702 GN=TBL7 PE=3 SV=1 && PF14416:PMR5 N terminal Domain|PF13839:GDSL/SGNH-like Acyl-Esterase family found in Pmr5 and Cas1p	BES1
123123766	627.235	524.381	958.997	174.28	227.695	267.305	703.538	223.093	1.65644	6.69e-08	5.02e-06	LOC123123766	NC_057808.1	550629223	550637261	-	2190	protein_coding	inner membrane protein PPF-1%2C chloroplastic-like && sp|Q9FYL3|ALB4_ARATH ALBINO3-like protein 1, chloroplastic OS=Arabidopsis thaliana OX=3702 GN=ALB4 PE=1 SV=3 && PF02096:60Kd inner membrane protein	-
123190343	41.1821	47.671	65.1841	3.03976	6.96012	6.56538	51.3457	5.52175	3.21259	6.69e-08	5.02e-06	LOC123190343	NC_057797.1	698486611	698490376	+	1328	protein_coding	binding partner of ACD11 1-like && sp|Q9LFD5|BPA1_ARATH Binding partner of ACD11 1 OS=Arabidopsis thaliana OX=3702 GN=BPA1 PE=1 SV=1 && -	B3
123104359	204.854	57.0183	438.511	24.3181	29.8291	29.0753	233.461	27.7408	3.07245	6.72e-08	5.04e-06	LOC123104359	NC_057806.1	504363562	504369504	-	1945	protein_coding	beta-glucosidase 31-like && sp|B7F7K7|BGL31_ORYSJ Beta-glucosidase 31 OS=Oryza sativa subsp. japonica OX=39947 GN=BGLU31 PE=2 SV=1 && PF00232:Glycosyl hydrolase family 1	NAC
123189828	69.6928	62.6266	61.2336	8.10603	14.9145	7.50329	64.5177	10.1746	2.66679	6.73e-08	5.04e-06	LOC123189828	NC_057797.1	621191967	621192733	-	767	protein_coding	uncharacterized LOC123189828 && - && -	-
123151583	122.49	62.6266	75.0605	5.06627	7.95442	19.6961	86.7258	10.9056	2.98063	6.74e-08	5.04e-06	LOC123151583	NC_057812.1	199058860	199061600	-	1328	protein_coding	anthranilate O-methyltransferase 3-like && sp|D9J100|AAMT3_MAIZE Anthranilate O-methyltransferase 3 OS=Zea mays OX=4577 GN=AAMT3 PE=1 SV=1 && PF03492:SAM dependent carboxyl methyltransferase	MYB_related
123190161	166.84	198.162	147.158	434.686	429.539	409.867	170.72	424.697	-1.3141	6.76e-08	5.05e-06	LOC123190161	NC_057797.1	677790136	677794377	+	4022	lncRNA	uncharacterized LOC123190161 && - && -	-
123156432	219.638	163.577	664.681	33.4374	59.6581	68.4675	349.298	53.8544	2.69623	6.81e-08	5.09e-06	LOC123156432	NC_057813.1	376284261	376291263	-	2799	protein_coding	factor of DNA methylation 1-like%2C transcript variant X1 && sp|F4JH53|FDM2_ARATH Factor of DNA methylation 2 OS=Arabidopsis thaliana OX=3702 GN=FDM2 PE=1 SV=1 && PF03468:XS domain|PF03470:XS zinc finger domain|PF03469:XH domain	NAC
123113325	21.119	13.0862	14.8146	58.7687	110.368	98.4807	16.3399	89.2057	-2.45442	6.97e-08	5.2e-06	LOC123113325	NC_057807.1	575203762	575207364	-	1701	lncRNA	uncharacterized LOC123113325 && - && -	MYB_related
123121464	476.234	304.721	508.634	123.617	132.242	168.824	429.863	141.561	1.60135	7.01e-08	5.22e-06	LOC123121464	NC_057808.1	321468276	321475992	-	873	protein_coding	centromere protein V-like && sp|Q9CXS4|CENPV_MOUSE Centromere protein V OS=Mus musculus OX=10090 GN=Cenpv PE=1 SV=2 && PF04828:Glutathione-dependent formaldehyde-activating enzyme	-
123054098	140.441	31.7807	47.4066	3.03976	0	7.50329	73.2096	3.51435	4.36388	7.15e-08	5.32e-06	LOC123054098	NC_057799.1	502924983	502927191	-	1618	protein_coding	protein DMR6-LIKE OXYGENASE 1-like && sp|Q9ZSA8|DLO1_ARATH Protein DMR6-LIKE OXYGENASE 1 OS=Arabidopsis thaliana OX=3702 GN=DLO1 PE=1 SV=1 && PF03171:2OG-Fe(II) oxygenase superfamily|PF14226:non-haem dioxygenase in morphine synthesis N-terminal	C3H
123044994	583.941	689.828	556.04	1240.22	1505.37	1365.6	609.936	1370.4	-1.16766	7.16e-08	5.32e-06	LOC123044994	NC_057798.1	375061269	375062742	-	983	protein_coding	uncharacterized LOC123044994 && - && -	-
123070388	561.766	300.982	410.858	143.882	130.254	143.5	424.535	139.212	1.60786	7.22e-08	5.36e-06	LOC123070388	NC_057801.1	464905398	464907772	+	1012	protein_coding	probable cytokinin riboside 5'-monophosphate phosphoribohydrolase LOGL1 && sp|Q8LR50|LOGL1_ORYSJ Probable cytokinin riboside 5'-monophosphate phosphoribohydrolase LOGL1 OS=Oryza sativa subsp. japonica OX=39947 GN=LOGL1 PE=2 SV=1 && PF03641:Possible lysine decarboxylase	WRKY
123083199	60.1892	45.8016	26.6662	1.01325	3.97721	2.81373	44.219	2.6014	4.0813	7.23e-08	5.37e-06	LOC123083199	NC_057803.1	696218894	696219956	-	977	protein_coding	histone H1-like && sp|P40267|H1_SOLPN Histone H1 OS=Solanum pennellii OX=28526 PE=2 SV=1 && PF00538:linker histone H1 and H5 family	BBR-BPC
123162839	550.15	443.06	1000.48	190.492	216.758	151.942	664.563	186.397	1.8343	7.37e-08	5.47e-06	LOC123162839	NC_057813.1	454605652	454609782	-	3134	protein_coding	receptor-like protein kinase HERK 1 && sp|Q9LX66|HERK_ARATH Receptor-like protein kinase HERK 1 OS=Arabidopsis thaliana OX=3702 GN=HERK1 PE=1 SV=1 && PF12819:Malectin-like domain|PF07714:Protein tyrosine kinase	GRAS
123179978	138.33	233.681	178.763	42.5567	37.7835	63.778	183.591	48.0394	1.9331	7.43e-08	5.51e-06	LOC123179978	NC_057796.1	15701327	15703154	-	1828	protein_coding	xylan glycosyltransferase MUCI21-like && sp|Q9SS43|MUC21_ARATH Xylan glycosyltransferase MUCI21 OS=Arabidopsis thaliana OX=3702 GN=MUCI21 PE=1 SV=1 && PF04577:Protein of unknown function (DUF563)	C2H2
123122688	30.6226	41.1279	116.541	5.06627	2.98291	5.62747	62.7639	4.55888	3.78105	7.54e-08	5.58e-06	LOC123122688	NC_057808.1	453540962	453548321	+	1943	protein_coding	probable E3 ubiquitin-protein ligase BAH1-like 1%2C transcript variant X1 && sp|A2XK56|BAHL1_ORYSI Probable E3 ubiquitin-protein ligase BAH1-like 1 OS=Oryza sativa subsp. indica OX=39946 GN=OsI_12825 PE=3 SV=1 && PF13445:RING-type zinc-finger	-
123128142	468.842	261.723	288.39	84.1001	92.4701	123.804	339.652	100.125	1.76055	7.62e-08	5.63e-06	LOC123128142	NC_057809.1	502801964	502807547	-	867	protein_coding	universal stress protein A-like protein && sp|Q8LGG8|USPAL_ARATH Universal stress protein A-like protein OS=Arabidopsis thaliana OX=3702 GN=At3g01520 PE=1 SV=2 && PF00582:Universal stress protein family	-
123095790	214.358	118.71	230.12	39.5169	51.7037	53.4609	187.729	48.2272	1.95896	7.62e-08	5.63e-06	LOC123095790	NC_057805.1	16147143	16151052	-	1419	protein_coding	alkaline ceramidase-like && sp|Q94IB9|ACER_ARATH Alkaline ceramidase OS=Arabidopsis thaliana OX=3702 GN=ACER PE=2 SV=1 && PF05875:Ceramidase	-
123157472	278.771	238.355	278.514	99.2989	60.6524	99.4186	265.213	86.4567	1.61638	7.69e-08	5.68e-06	LOC123157472	NC_057813.1	66803318	66805994	+	1842	protein_coding	uncharacterized LOC123157472 && - && PF06941:5' nucleotidase, deoxy (Pyrimidine), cytosolic type C protein (NT5C)	-
123099038	93.9796	59.8225	205.429	23.3048	12.9259	14.0687	119.744	16.7665	2.83811	7.75e-08	5.71e-06	LOC123099038	NC_057805.1	500596301	500598949	+	2649	protein_coding	subtilisin-like protease 4 && sp|A9QY38|SBT4_LOTJA Subtilisin-like protease 4 OS=Lotus japonicus OX=34305 GN=SBTM4 PE=2 SV=1 && PF00082:Subtilase family|PF02225:PA domain|PF17766:Fibronectin type-III domain|PF05922:Peptidase inhibitor I9	Trihelix
123132051	68.6368	10.282	12.8393	516.76	223.718	169.762	30.586	303.413	-3.31666	7.83e-08	5.77e-06	LOC123132051	NC_057809.1	64245273	64246266	+	994	protein_coding	chlorophyll a-b binding protein of LHCII type 1-like && sp|P04784|CB21_WHEAT Chlorophyll a-b binding protein, chloroplastic OS=Triticum aestivum OX=4565 GN=WHAB1.6 PE=3 SV=1 && PF00504:Chlorophyll A-B binding protein	ERF
732707	93900.4	117732	90190.1	247871	229024	198003	100607	224966	-1.16097	7.84e-08	5.77e-06	LOC732707	NC_057805.1	122033716	122036136	+	1832	protein_coding	ribulose bisphosphate carboxylase/oxygenase activase A%2C chloroplastic%2C transcript variant X2 && sp|Q40073|RCAA_HORVU Ribulose bisphosphate carboxylase/oxygenase activase A, chloroplastic OS=Hordeum vulgare OX=4513 GN=RCAA PE=2 SV=1 && PF00004:ATPase family associated with various cellular activities (AAA)	Trihelix
123140984	16.8952	74.7781	16.7898	0	0	0	36.1544	0	7.64861	7.88e-08	5.79e-06	LOC123140984	NC_057811.1	41579374	41583048	-	1825	protein_coding	S-(+)-linalool synthase%2C chloroplastic-like && sp|Q6ZH94|LINS_ORYSJ S-(+)-linalool synthase, chloroplastic OS=Oryza sativa subsp. japonica OX=39947 GN=LIS PE=2 SV=1 && PF03936:Terpene synthase family, metal binding domain|PF01397:Terpene synthase, N-terminal domain	bHLH
100125732	299.89	171.055	256.786	71.941	69.6012	81.5983	242.577	74.3802	1.70401	7.91e-08	5.81e-06	LOC100125732	NC_057802.1	67644834	67648024	-	1628	protein_coding	acyl transferase 9 && sp|Q9LGQ6|AT9_ORYSJ Acyl transferase 9 OS=Oryza sativa subsp. japonica OX=39947 GN=AT9 PE=2 SV=1 && PF02458:Transferase family	Nin-like
101290629	692.704	466.428	1164.43	177.319	203.832	254.174	774.519	211.775	1.8703	7.99e-08	5.86e-06	LOC101290629	NC_057804.1	144523465	144526372	-	2061	protein_coding	CBL-interacting protein kinase 15 && sp|Q2QYM3|CIPKE_ORYSJ CBL-interacting protein kinase 14 OS=Oryza sativa subsp. japonica OX=39947 GN=CIPK14 PE=2 SV=1 && PF00069:Protein kinase domain|PF03822:NAF domain	YABBY
123131748	1433.98	1322.64	1262.2	580.595	598.57	685.613	1339.61	621.593	1.10753	8e-08	5.87e-06	LOC123131748	NC_057809.1	24498827	24513309	-	2520	protein_coding	luminal-binding protein 2%2C transcript variant X2 && sp|P24067|BIP2_MAIZE Luminal-binding protein 2 OS=Zea mays OX=4577 GN=BIPE2 PE=1 SV=3 && PF00012:Hsp70 protein	GATA
123157257	2201.66	1765.7	2813.78	920.035	590.616	906.022	2260.38	805.558	1.48842	8.11e-08	5.94e-06	LOC123157257	NC_057813.1	463609366	463613904	+	2439	protein_coding	phosphomannomutase/phosphoglucomutase-like && sp|Q88BD4|ALGC_PSESM Phosphomannomutase/phosphoglucomutase OS=Pseudomonas syringae pv. tomato (strain ATCC BAA-871 / DC3000) OX=223283 GN=algC PE=3 SV=1 && PF02880:Phosphoglucomutase/phosphomannomutase, alpha/beta/alpha domain III|PF02879:Phosphoglucomutase/phosphomannomutase, alpha/beta/alpha domain II|PF02878:Phosphoglucomutase/phosphomannomutase, a…	ARF
novel.1595	80.2523	21.4987	26.6662	173.266	259.513	309.511	42.8057	247.43	-2.53707	8.16e-08	5.97e-06	-	NC_057803.1	3365242	3365996	-	755	-	- && sp|P07679|IBB1_COILA Bowman-Birk type trypsin inhibitor TI1 OS=Coix lacryma-jobi OX=4505 PE=1 SV=1 && -	-
543090	2052.77	754.324	515.547	266.486	142.185	63.778	1107.55	157.483	2.81464	8.18e-08	5.98e-06	LOC543090	NC_057804.1	494290632	494292376	+	1745	protein_coding	allene oxide synthase 2 && sp|Q7XYS3|C74A2_ORYSJ Allene oxide synthase 2 OS=Oryza sativa subsp. japonica OX=39947 GN=CYP74A2 PE=2 SV=2 && PF00067:Cytochrome P450	MYB
123151491	2222.78	1443.22	2886.87	699.145	831.237	744.702	2184.29	758.361	1.52613	8.34e-08	6.09e-06	LOC123151491	NC_057812.1	243396654	243402715	+	1765	protein_coding	uncharacterized LOC123151491%2C transcript variant X1 && - && -	-
123189685	138.33	134.601	188.639	603.899	559.792	323.579	153.856	495.757	-1.68771	8.43e-08	6.15e-06	LOC123189685	NC_057797.1	605551096	605555579	+	2371	protein_coding	protein NUCLEAR FUSION DEFECTIVE 4-like && - && PF07690:Major Facilitator Superfamily|PF06813:Nodulin-like	NF-YC
123185557	19.0071	4.67363	2.96291	77.0073	63.6353	112.549	8.88122	84.3973	-3.26654	8.45e-08	6.16e-06	LOC123185557	NC_057797.1	557846887	557848449	-	1563	protein_coding	uncharacterized LOC123185557 && - && -	-
123098007	76.0285	42.9974	49.3819	193.532	163.066	268.243	56.1359	208.28	-1.89525	8.47e-08	6.17e-06	LOC123098007	NC_057805.1	374555948	374557488	-	1541	protein_coding	probable carboxylesterase 17 && sp|Q9LFR7|CXE17_ARATH Probable carboxylesterase 17 OS=Arabidopsis thaliana OX=3702 GN=CXE17 PE=1 SV=1 && PF07859:alpha/beta hydrolase fold	NAC
123102481	55.9654	71.9739	72.0976	13.1723	8.94872	13.1308	66.679	11.7506	2.50443	8.54e-08	6.21e-06	LOC123102481	NC_057806.1	100132823	100136419	+	1745	pseudogene	- && sp|Q9S7B2|RS2_MAIZE Protein rough sheath 2 OS=Zea mays OX=4577 GN=RS2 PE=1 SV=1 && PF13921:Myb-like DNA-binding domain	MYB
123181482	859.544	776.757	1017.27	355.652	420.59	359.22	884.523	378.487	1.22464	8.55e-08	6.22e-06	LOC123181482	NC_057796.1	282603511	282606704	-	1574	protein_coding	cinnamoyl-CoA reductase-like SNL6 && sp|A0A0B6VQ48|PAR1_ROSHC Phenylacetaldehyde reductase OS=Rosa hybrid cultivar OX=128735 GN=PAR PE=1 SV=1 && PF01370:NAD dependent epimerase/dehydratase family	NAC
780590	802.523	52.3447	90.8627	1.01325	2.98291	2.81373	315.243	2.26997	7.11401	8.72e-08	6.33e-06	LOC780590	NC_057798.1	792586511	792590624	-	2192	protein_coding	4-hydroxy-7-methoxy-3-oxo-3%2C4-dihydro-2H-1%2C4-benzoxazin-2-yl glucoside beta-D-glucosidase 1b%2C chloroplastic-like && sp|Q1XH05|HGL1B_WHEAT 4-hydroxy-7-methoxy-3-oxo-3,4-dihydro-2H-1,4-benzoxazin-2-yl glucoside beta-D-glucosidase 1b, chloroplastic OS=Triticum aestivum OX=4565 GN=GLU1B PE=1 SV=1 && PF00232:Glycosyl hydrolase family 1	EIL
123145075	337.904	410.345	309.131	1677.95	1185.21	699.682	352.46	1187.61	-1.75217	8.73e-08	6.33e-06	LOC123145075	NC_057811.1	355300133	355306954	+	4550	protein_coding	uncharacterized LOC123145075%2C transcript variant X1 && sp|Q9XIN0|LHW_ARATH Transcription factor LHW OS=Arabidopsis thaliana OX=3702 GN=LHW PE=1 SV=1 && PF14215:bHLH-MYC and R2R3-MYB transcription factors N-terminal	bHLH
123134625	57.0214	58.8877	82.9616	6.07953	9.94302	14.0687	66.2902	10.0304	2.71824	8.82e-08	6.39e-06	LOC123134625	NC_057795.1	495379958	495383646	-	1442	protein_coding	serine/threonine-protein kinase SAPK4-like && sp|Q5N942|SAPK4_ORYSJ Serine/threonine-protein kinase SAPK4 OS=Oryza sativa subsp. japonica OX=39947 GN=SAPK4 PE=2 SV=2 && PF00069:Protein kinase domain	LBD
123105980	121.434	128.057	210.367	40.5302	43.7493	34.7027	153.286	39.6607	1.95151	8.9e-08	6.44e-06	LOC123105980	NC_057806.1	683169529	683172442	+	2914	protein_coding	subtilisin-like protease 4 && sp|A9QY38|SBT4_LOTJA Subtilisin-like protease 4 OS=Lotus japonicus OX=34305 GN=SBTM4 PE=2 SV=1 && PF17766:Fibronectin type-III domain|PF00082:Subtilase family|PF02225:PA domain|PF05922:Peptidase inhibitor I9	Trihelix
123081605	559.654	318.742	750.605	159.081	147.157	66.5917	543	124.276	2.12825	8.95e-08	6.47e-06	LOC123081605	NC_057803.1	20124545	20126757	-	1056	protein_coding	neurogenic locus notch homolog protein 1-like && - && -	-
123088451	13.7274	27.1071	18.7651	84.1001	119.316	85.3499	19.8665	96.2554	-2.26986	9.12e-08	6.59e-06	LOC123088451	NC_057803.1	735259672	735261969	+	1309	lncRNA	uncharacterized LOC123088451%2C transcript variant X2 && - && -	-
123106739	81.3082	12.1514	91.8504	0	1.9886	3.75165	61.77	1.91342	4.99064	9.12e-08	6.59e-06	LOC123106739	NC_057806.1	160153989	160155019	+	1031	protein_coding	uncharacterized LOC123106739 && - && -	-
123164033	1600.82	1582.49	1294.79	697.119	713.909	596.512	1492.7	669.18	1.15759	9.22e-08	6.65e-06	LOC123164033	NC_057814.1	206430262	206437160	-	2516	protein_coding	probable amino-acid acetyltransferase NAGS2%2C chloroplastic && sp|B5X4Z4|NAGS2_ARATH Probable amino-acid acetyltransferase NAGS2, chloroplastic OS=Arabidopsis thaliana OX=3702 GN=NAGS2 PE=1 SV=1 && PF00583:Acetyltransferase (GNAT) family|PF00696:Amino acid kinase family	MYB_related
123113645	247.093	115.906	414.808	42.5567	43.7493	62.8401	259.269	49.7153	2.3812	9.26e-08	6.67e-06	LOC123113645	NC_057807.1	613905208	613907251	-	2044	protein_coding	anthocyanin 3'-O-beta-glucosyltransferase-like && sp|Q8H0F2|ANGT_GENTR Anthocyanin 3'-O-beta-glucosyltransferase OS=Gentiana triflora OX=55190 PE=1 SV=1 && PF00201:UDP-glucoronosyl and UDP-glucosyl transferase	MYB
123128289	884.887	741.238	773.321	365.785	333.091	377.978	799.815	358.951	1.15557	9.3e-08	6.7e-06	LOC123128289	NC_057809.1	527011933	527014047	-	2038	protein_coding	zinc finger protein CONSTANS-LIKE 16-like && sp|Q8RWD0|COL16_ARATH Zinc finger protein CONSTANS-LIKE 16 OS=Arabidopsis thaliana OX=3702 GN=COL16 PE=1 SV=2 && PF00643:B-box zinc finger|PF06203:CCT motif	CO-like
novel.326	131.994	145.817	125.43	306.003	359.937	337.648	134.414	334.529	-1.31508	9.34e-08	6.72e-06	-	NC_057795.1	70878429	70879899	-	1471	-	- && - && -	-
123071109	186.903	193.488	268.638	64.8483	75.567	73.1571	216.343	71.1908	1.60338	9.37e-08	6.73e-06	LOC123071109	NC_057801.1	589537712	589539484	+	1692	protein_coding	UDP-glycosyltransferase 87A1-like && sp|O64732|U87A1_ARATH UDP-glycosyltransferase 87A1 OS=Arabidopsis thaliana OX=3702 GN=UGT87A1 PE=2 SV=1 && PF00201:UDP-glucoronosyl and UDP-glucosyl transferase	GRAS
123054226	366.415	171.99	431.598	89.1664	87.4986	54.3989	323.334	77.0213	2.07029	9.44e-08	6.78e-06	LOC123054226	NC_057799.1	525772927	525777706	+	2900	protein_coding	putative glycerol-3-phosphate transporter 1%2C transcript variant X3 && sp|Q9C5L3|GLPT1_ARATH Putative glycerol-3-phosphate transporter 1 OS=Arabidopsis thaliana OX=3702 GN=At3g47420 PE=2 SV=1 && -	-
123062038	190.071	102.82	81.974	588.701	411.641	390.171	124.955	463.504	-1.89286	9.45e-08	6.78e-06	LOC123062038	NC_057800.1	527055641	527057532	-	1892	protein_coding	disease resistance protein RGA2-like && - && PF18052:Rx N-terminal domain	GRAS
123111340	208.022	182.272	272.588	69.9145	79.5442	47.8335	220.961	65.7641	1.74973	9.56e-08	6.84e-06	LOC123111340	NC_057807.1	274741261	274742457	+	1197	protein_coding	uncharacterized LOC123111340 && - && PF03168:Late embryogenesis abundant protein	-
123163828	0	4.67363	5.92583	74.9808	57.6695	30.0132	3.53315	54.2212	-3.91717	9.56e-08	6.84e-06	LOC123163828	NC_057814.1	16779684	16783593	+	3079	protein_coding	disease resistance protein Pik-2-like && sp|P0DO07|PIK2_ORYSJ Disease resistance protein Pik-2 OS=Oryza sativa subsp. japonica OX=39947 GN=PIK-2 PE=3 SV=1 && PF18052:Rx N-terminal domain|PF00931:NB-ARC domain	WRKY
123160228	141.497	39.2585	227.157	9.11929	16.9031	19.6961	135.971	15.2395	3.15406	9.6e-08	6.87e-06	LOC123160228	NC_057813.1	122091567	122094405	+	1541	protein_coding	pyruvate dehydrogenase E1 component subunit alpha-2%2C mitochondrial-like && sp|Q654V6|ODPA2_ORYSJ Pyruvate dehydrogenase E1 component subunit alpha-2, mitochondrial OS=Oryza sativa subsp. japonica OX=39947 GN=Os06g0246500 PE=2 SV=1 && PF00676:Dehydrogenase E1 component	E2F/DP
123101938	359.023	609.441	325.921	86.1266	70.5955	160.383	431.462	105.702	2.02822	9.69e-08	6.93e-06	LOC123101938	NC_057806.1	4081079	4083626	+	2010	protein_coding	obtusifoliol 14-alpha demethylase-like && sp|P93846|CP51_SORBI Obtusifoliol 14-alpha demethylase OS=Sorghum bicolor OX=4558 GN=CYP51 PE=1 SV=1 && PF00067:Cytochrome P450	HSF
543002	1472	704.783	898.751	255.34	246.587	396.737	1025.18	299.555	1.77429	9.77e-08	6.97e-06	LOC543002	NC_057796.1	66742065	66743371	+	1020	protein_coding	probable glutathione S-transferase GSTF1 && sp|O65857|GSTF1_ORYSJ Probable glutathione S-transferase GSTF1 OS=Oryza sativa subsp. japonica OX=39947 GN=GSTF1 PE=1 SV=2 && PF02798:Glutathione S-transferase, N-terminal domain|PF00043:Glutathione S-transferase, C-terminal domain	CAMTA
123051323	99.2594	20.564	234.07	12.1591	6.96012	5.62747	117.965	8.24888	3.84126	9.86e-08	7.04e-06	LOC123051323	NC_057799.1	33565624	33569403	-	2455	protein_coding	transketolase%2C chloroplastic-like && sp|Q7SIC9|TKTC_MAIZE Transketolase, chloroplastic OS=Zea mays OX=4577 PE=1 SV=1 && PF02780:Transketolase, C-terminal domain|PF02779:Transketolase, pyrimidine binding domain|PF00456:Transketolase, thiamine diphosphate binding domain	-
123124325	705.375	288.83	353.574	1653.63	1451.68	1500.66	449.26	1535.32	-1.77368	9.91e-08	7.06e-06	LOC123124325	NC_057808.1	57137185	57138284	+	1014	protein_coding	E3 ubiquitin-protein ligase RMA2-like && sp|Q6R567|RMA1_CAPAN E3 ubiquitin-protein ligase RMA1H1 OS=Capsicum annuum OX=4072 GN=RMA1H1 PE=1 SV=1 && PF13445:RING-type zinc-finger	-
123189460	2029.54	1171.21	2214.28	571.475	523.003	733.447	1805.01	609.308	1.56649	1.01e-07	7.18e-06	LOC123189460	NC_057797.1	565904660	565909706	-	1965	protein_coding	betaine aldehyde dehydrogenase-like && sp|Q40024|BADH_HORVU Betaine aldehyde dehydrogenase OS=Hordeum vulgare OX=4513 PE=2 SV=1 && PF00171:Aldehyde dehydrogenase family	bHLH
123053623	167.896	158.903	226.169	62.8218	60.6524	50.6472	184.323	58.0405	1.668	1.01e-07	7.19e-06	LOC123053623	NC_057794.1	417178454	417183157	+	2796	protein_coding	diacylglycerol kinase 1-like%2C transcript variant X2 && sp|Q39017|DGK1_ARATH Diacylglycerol kinase 1 OS=Arabidopsis thaliana OX=3702 GN=DGK1 PE=1 SV=2 && PF00781:Diacylglycerol kinase catalytic domain|PF00609:Diacylglycerol kinase accessory domain|PF00130:Phorbol esters/diacylglycerol binding domain (C1 domain)	-
123100828	3.16785	3.7389	3.95055	58.7687	49.7151	27.1994	3.6191	45.2278	-3.63921	1.02e-07	7.23e-06	LOC123100828	NC_057805.1	517516535	517518349	-	1050	pseudogene	- && sp|Q39224|SRG1_ARATH Protein SRG1 OS=Arabidopsis thaliana OX=3702 GN=SRG1 PE=2 SV=1 && -	STAT
123054024	115.099	264.527	173.824	600.86	602.547	579.629	184.483	594.345	-1.68609	1.03e-07	7.31e-06	LOC123054024	NC_057799.1	488509672	488518210	-	6677	lncRNA	uncharacterized LOC123054024%2C transcript variant X8 && sp|Q69V23|CESA3_ORYSJ Probable cellulose synthase A catalytic subunit 3 [UDP-forming] OS=Oryza sativa subsp. japonica OX=39947 GN=CESA3 PE=2 SV=1 && -	-
123175144	43.294	22.4334	113.578	0	0	1.87582	59.7686	0.625274	6.52519	1.04e-07	7.38e-06	LOC123175144	NC_057796.1	458248337	458250249	+	1086	protein_coding	homeobox-leucine zipper protein HOX7-like && sp|A2X674|HOX7_ORYSI Homeobox-leucine zipper protein HOX7 OS=Oryza sativa subsp. indica OX=39946 GN=HOX7 PE=1 SV=2 && PF00046:Homeodomain|PF02183:Homeobox associated leucine zipper	HD-ZIP
123159769	24.2869	122.449	116.541	5.06627	8.94872	10.317	87.7591	8.11067	3.43347	1.04e-07	7.38e-06	LOC123159769	NC_057813.1	148770237	148772415	-	2091	protein_coding	uncharacterized LOC123159769 && - && PF13962:Domain of unknown function	NF-YA
123182024	19.0071	27.1071	23.7033	103.352	91.4758	90.0395	23.2725	94.9557	-2.02475	1.06e-07	7.51e-06	LOC123182024	NC_057794.1	574634712	574637415	+	1127	lncRNA	uncharacterized LOC123182024 && - && -	-
123139368	1016.88	975.854	1065.66	499.534	467.322	494.279	1019.47	487.045	1.06564	1.07e-07	7.55e-06	LOC123139368	NC_057810.1	553363033	553372105	+	4101	protein_coding	heat shock 70 kDa protein 17-like && sp|F4JMJ1|HSP7R_ARATH Heat shock 70 kDa protein 17 OS=Arabidopsis thaliana OX=3702 GN=HSP70-17 PE=2 SV=1 && PF00012:Hsp70 protein	LBD
123071805	2.1119	0	1.97528	31.4109	36.7892	47.8335	1.36239	38.6778	-4.86284	1.08e-07	7.6e-06	LOC123071805	NC_057801.1	694062811	694066089	-	1646	protein_coding	gibberellin 20 oxidase 2-like && sp|P0C5H5|GAOX2_ORYSI Gibberellin 20 oxidase 2 OS=Oryza sativa subsp. indica OX=39946 GN=20ox2 PE=1 SV=1 && PF14226:non-haem dioxygenase in morphine synthesis N-terminal|PF03171:2OG-Fe(II) oxygenase superfamily	WRKY
123085854	2276.63	2136.78	5306.58	853.16	885.923	964.173	3240	901.085	1.84623	1.09e-07	7.67e-06	LOC123085854	NC_057803.1	212671264	212682339	-	2754	protein_coding	sucrose synthase 4-like && sp|Q10LP5|SUS4_ORYSJ Sucrose synthase 4 OS=Oryza sativa subsp. japonica OX=39947 GN=SUS4 PE=2 SV=1 && PF00862:Sucrose synthase|PF00534:Glycosyl transferases group 1	HB-other
123145709	2221.72	1479.67	1729.35	4567.75	3747.53	5493.35	1810.25	4602.87	-1.34652	1.1e-07	7.73e-06	LOC123145709	NC_057811.1	443546704	443550021	+	2160	protein_coding	ferredoxin--nitrite reductase%2C chloroplastic && sp|Q42997|NIR_ORYSJ Ferredoxin--nitrite reductase, chloroplastic OS=Oryza sativa subsp. japonica OX=39947 GN=Os01g0357100 PE=2 SV=1 && PF01077:Nitrite and sulphite reductase 4Fe-4S domain|PF03460:Nitrite/Sulfite reductase ferredoxin-like half domain	-
123182006	240.757	149.556	1115.04	11.1458	9.94302	24.3857	501.786	15.1582	5.04706	1.11e-07	7.83e-06	LOC123182006	NC_057796.1	351544616	351548049	+	2441	protein_coding	protein NRT1/ PTR FAMILY 3.1-like && sp|Q9SX20|PTR18_ARATH Protein NRT1/ PTR FAMILY 3.1 OS=Arabidopsis thaliana OX=3702 GN=NPF3.1 PE=2 SV=1 && PF00854:POT family	G2-like
123181843	157.337	167.316	177.775	62.8218	40.7664	54.3989	167.476	52.6623	1.66949	1.12e-07	7.87e-06	LOC123181843	NC_057796.1	331790635	331792828	+	2194	protein_coding	cytochrome P450 94A2-like && sp|P98188|C94A2_VICSA Cytochrome P450 94A2 OS=Vicia sativa OX=3908 GN=CYP94A2 PE=2 SV=1 && PF00067:Cytochrome P450	C2H2
123120849	90.8118	82.2559	404.932	17.2253	28.8348	21.572	192.666	22.544	3.09519	1.12e-07	7.89e-06	LOC123120849	NC_057795.1	304546293	304551652	-	2174	protein_coding	very-long-chain aldehyde decarbonylase GL1-5 && sp|B8BHF1|GLO15_ORYSI Very-long-chain aldehyde decarbonylase GL1-5 OS=Oryza sativa subsp. indica OX=39946 GN=GL1-5 PE=2 SV=1 && PF12076:WAX2 C-terminal domain|PF04116:Fatty acid hydroxylase superfamily	FAR1
123160011	79.1963	73.8434	157.034	740.689	279.399	408.929	103.358	476.339	-2.20416	1.14e-07	8.04e-06	LOC123160011	NC_057813.1	86598816	86601644	-	1688	protein_coding	WAT1-related protein At1g44800-like && sp|Q9LPF1|WTR8_ARATH WAT1-related protein At1g44800 OS=Arabidopsis thaliana OX=3702 GN=At1g44800 PE=1 SV=1 && PF00892:EamA-like transporter family	ERF
123124811	1149.93	851.535	1204.92	502.574	398.715	402.364	1068.79	434.551	1.2984	1.18e-07	8.27e-06	LOC123124811	NC_057795.1	366922010	366925242	+	1551	protein_coding	actin-2 && sp|P0C539|ACT2_ORYSI Actin-2 OS=Oryza sativa subsp. indica OX=39946 GN=ACT2 PE=3 SV=1 && PF00022:Actin	Trihelix
123148935	2.1119	3.7389	5.92583	55.729	120.311	19.6961	3.92555	65.2452	-4.04767	1.19e-07	8.32e-06	LOC123148935	NC_057812.1	37169570	37175070	-	2397	protein_coding	probable lysophospholipase BODYGUARD 1%2C transcript variant X1 && sp|O22977|BDG3_ARATH Probable lysophospholipase BODYGUARD 3 OS=Arabidopsis thaliana OX=3702 GN=BDG3 PE=2 SV=1 && PF00561:alpha/beta hydrolase fold	-
123165576	599.78	273.875	265.675	65.8615	99.4302	111.611	379.777	92.3011	2.03925	1.21e-07	8.45e-06	LOC123165576	NC_057814.1	137357537	137360515	+	1272	protein_coding	annexin D1-like && sp|Q9SYT0|ANXD1_ARATH Annexin D1 OS=Arabidopsis thaliana OX=3702 GN=ANN1 PE=1 SV=1 && PF00191:Annexin	MYB
123184860	238.645	224.334	166.911	541.078	502.123	511.162	209.963	518.121	-1.3034	1.22e-07	8.54e-06	LOC123184860	NC_057797.1	86877762	86880718	-	2069	protein_coding	tau-cadinol synthase-like && sp|Q5GJ59|TPS7_MAIZE Tau-cadinol synthase OS=Zea mays OX=4577 GN=TPS7 PE=1 SV=1 && PF01397:Terpene synthase, N-terminal domain|PF03936:Terpene synthase family, metal binding domain	GRAS
123149997	267.156	415.953	192.589	88.1531	63.6353	88.1637	291.899	79.984	1.86799	1.22e-07	8.54e-06	LOC123149997	NC_057812.1	175909088	175913514	+	3323	protein_coding	squamosa promoter-binding-like protein 1%2C transcript variant X1 && sp|Q9LGU7|SPL1_ORYSJ Squamosa promoter-binding-like protein 1 OS=Oryza sativa subsp. japonica OX=39947 GN=SPL1 PE=2 SV=1 && PF03110:SBP domain	SBP
123161804	84.4761	81.3212	71.11	7.09278	16.9031	18.7582	78.9691	14.2514	2.46505	1.23e-07	8.63e-06	LOC123161804	NC_057813.1	482342555	482350434	-	778	protein_coding	uncharacterized LOC123161804 && - && -	MYB_related
123049182	205.91	107.493	95.8009	17.2253	32.812	30.9511	136.402	26.9961	2.33401	1.24e-07	8.67e-06	LOC123049182	NC_057799.1	200014915	200016445	+	1123	protein_coding	uncharacterized LOC123049182 && - && PF04520:Senescence regulator	-
123152027	104.539	108.428	240.984	14.1856	39.7721	22.5099	151.317	25.4892	2.56957	1.25e-07	8.75e-06	LOC123152027	NC_057812.1	267023836	267025957	+	2031	protein_coding	ethylene-responsive transcription factor RAP2-6-like%2C transcript variant X1 && sp|Q9FGF8|ABR1_ARATH Ethylene-responsive transcription factor ABR1 OS=Arabidopsis thaliana OX=3702 GN=ABR1 PE=2 SV=1 && -	ERF
123181824	160.505	172.924	212.342	438.739	442.465	434.253	181.924	438.486	-1.26885	1.27e-07	8.88e-06	LOC123181824	NC_057796.1	328591206	328594212	+	2116	protein_coding	cytokinin dehydrogenase 9-like && sp|Q75K78|CKX9_ORYSJ Cytokinin dehydrogenase 9 OS=Oryza sativa subsp. japonica OX=39947 GN=CKX9 PE=2 SV=1 && PF01565:FAD binding domain|PF09265:Cytokinin dehydrogenase 1, FAD and cytokinin binding	bHLH
123146283	295.666	333.697	331.846	142.869	121.305	123.804	320.403	129.326	1.30949	1.28e-07	8.88e-06	LOC123146283	NC_057795.1	663090194	663095560	-	2399	protein_coding	mitogen-activated protein kinase 7-like%2C transcript variant X1 && sp|Q67C40|MPK7_ORYSJ Mitogen-activated protein kinase 7 OS=Oryza sativa subsp. japonica OX=39947 GN=MPK7 PE=2 SV=1 && -	HB-other
123131023	66.5249	21.4987	265.675	7.09278	0.994302	9.37911	117.899	5.82207	4.33528	1.28e-07	8.94e-06	LOC123131023	NC_057809.1	557796890	557798590	+	1272	protein_coding	2-oxoglutarate-dependent dioxygenase 11-like && sp|Q39224|SRG1_ARATH Protein SRG1 OS=Arabidopsis thaliana OX=3702 GN=SRG1 PE=2 SV=1 && PF14226:non-haem dioxygenase in morphine synthesis N-terminal|PF03171:2OG-Fe(II) oxygenase superfamily	STAT
123109414	31.6785	34.5849	38.5179	271.552	149.145	92.8532	34.9271	171.184	-2.29175	1.29e-07	8.96e-06	LOC123109414	NC_057806.1	713317440	713319250	+	1811	rRNA	18S ribosomal RNA && - && -	-
123165428	46.4618	67.3003	58.2707	213.797	147.157	198.837	57.3443	186.597	-1.69995	1.29e-07	8.96e-06	LOC123165428	NC_057814.1	65471846	65478304	+	2228	protein_coding	probable sugar phosphate/phosphate translocator At1g06470 && sp|Q8H184|PT106_ARATH Probable sugar phosphate/phosphate translocator At1g06470 OS=Arabidopsis thaliana OX=3702 GN=At1g06470 PE=2 SV=1 && -	ERF
123085585	261.876	246.768	179.75	62.8218	86.5043	76.9087	229.465	75.4116	1.60484	1.29e-07	8.98e-06	LOC123085585	NC_057803.1	135413850	135416769	-	2172	protein_coding	pyruvate decarboxylase 2 && sp|A2XFI3|PDC2_ORYSI Pyruvate decarboxylase 2 OS=Oryza sativa subsp. indica OX=39946 GN=PDC2 PE=2 SV=2 && PF00205:Thiamine pyrophosphate enzyme, central domain|PF02776:Thiamine pyrophosphate enzyme, N-terminal TPP binding domain|PF02775:Thiamine pyrophosphate enzyme, C-terminal TPP binding domain	NF-YC
123127866	47.5178	8.41253	151.109	0	1.9886	0.937911	69.013	0.975505	6.13881	1.31e-07	9.08e-06	LOC123127866	NC_057809.1	454093766	454094952	+	1079	protein_coding	homeobox-leucine zipper protein HOX24-like && sp|A2X7U1|HOX24_ORYSI Homeobox-leucine zipper protein HOX24 OS=Oryza sativa subsp. indica OX=39946 GN=HOX24 PE=2 SV=2 && PF02183:Homeobox associated leucine zipper|PF00046:Homeodomain	HD-ZIP
123096391	787.739	1107.65	10196.4	27.3579	82.5271	48.7714	4030.59	52.8854	6.25192	1.32e-07	9.11e-06	LOC123096391	NC_057805.1	86571690	86581674	-	9096	lncRNA	uncharacterized LOC123096391%2C transcript variant X1 && - && -	-
123143930	97.1475	98.1462	144.195	27.3579	28.8348	30.9511	113.163	29.0479	1.96131	1.32e-07	9.13e-06	LOC123143930	NC_057795.1	633776480	633781177	-	3394	protein_coding	uncharacterized LOC123143930 && - && PF14383:DUF761-associated sequence motif|PF14309:Domain of unknown function (DUF4378)	C2H2
543268	81.3082	123.384	88.8874	242.168	595.587	319.828	97.8598	385.861	-1.97807	1.33e-07	9.18e-06	LOC543268	NC_057814.1	435896229	435897546	+	1124	protein_coding	probable aquaporin TIP2-2 && sp|Q5Z6F0|TIP22_ORYSJ Probable aquaporin TIP2-2 OS=Oryza sativa subsp. japonica OX=39947 GN=TIP2-2 PE=2 SV=1 && PF00230:Major intrinsic protein	BES1
123092315	160.505	100.95	129.381	39.5169	24.8576	35.6406	130.279	33.3384	1.96513	1.33e-07	9.2e-06	LOC123092315	NC_057804.1	393851894	393852506	+	613	protein_coding	uncharacterized LOC123092315 && - && -	-
123059396	0	0.934726	0	42.5567	11.9316	128.494	0.311575	60.9941	-7.42497	1.34e-07	9.24e-06	LOC123059396	NC_057800.1	717634663	717636551	-	702	protein_coding	protein IRON-RELATED TRANSCRIPTION FACTOR 2-like && sp|A2WZ60|IRO2_ORYSI Protein IRON-RELATED TRANSCRIPTION FACTOR 2 OS=Oryza sativa subsp. indica OX=39946 GN=IRO2 PE=3 SV=1 && PF00010:Helix-loop-helix DNA-binding domain	bHLH
123058791	33.7904	17.7598	118.517	3.03976	0	0.937911	56.6889	1.32589	5.43106	1.34e-07	9.24e-06	LOC123058791	NC_057800.1	612293788	612296226	-	1000	protein_coding	PRA1 family protein A2-like && sp|Q8GWC3|PR1A2_ARATH PRA1 family protein A2 OS=Arabidopsis thaliana OX=3702 GN=PRA1A2 PE=2 SV=1 && PF03208:PRA1 family protein	-
123053218	228.085	238.355	557.028	63.835	98.4359	77.8466	341.156	80.0392	2.09162	1.37e-07	9.41e-06	LOC123053218	NC_057799.1	374321867	374325681	+	2067	protein_coding	uncharacterized LOC123053218%2C transcript variant X1 && sp|Q7VD61|PYRH_PROMA Uridylate kinase OS=Prochlorococcus marinus (strain SARG / CCMP1375 / SS120) OX=167539 GN=pyrH PE=3 SV=1 && PF13837:Myb/SANT-like DNA-binding domain|PF00696:Amino acid kinase family	Trihelix
123086640	57.0214	59.8225	157.034	12.1591	14.9145	3.75165	91.2928	10.2751	3.15771	1.39e-07	9.59e-06	LOC123086640	NC_057803.1	511175094	511178458	-	1733	protein_coding	atherin && - && -	-
123137066	52.7975	72.9086	56.2954	146.922	221.729	238.229	60.6672	202.294	-1.73612	1.42e-07	9.79e-06	LOC123137066	NC_057810.1	319948250	319951295	-	994	lncRNA	uncharacterized LOC123137066%2C transcript variant X2 && - && -	-
123054285	218.582	249.572	322.958	75.9941	102.413	91.9153	263.704	90.1075	1.54914	1.43e-07	9.8e-06	LOC123054285	NC_057794.1	432853103	432856400	+	2025	protein_coding	probable folate-biopterin transporter 7 && sp|Q9XIQ7|FBT7_ARATH Probable folate-biopterin transporter 7 OS=Arabidopsis thaliana OX=3702 GN=At1g64890 PE=2 SV=1 && PF03092:BT1 family	-
123078627	224.918	127.123	121.48	530.945	390.761	718.44	157.84	546.715	-1.79392	1.43e-07	9.8e-06	LOC123078627	NC_057802.1	318066431	318070470	+	1735	protein_coding	S-adenosyl-L-methionine-dependent uroporphyrinogen III methyltransferase%2C chloroplastic-like && sp|Q42606|UPM1_ARATH S-adenosyl-L-methionine-dependent uroporphyrinogen III methyltransferase, chloroplastic OS=Arabidopsis thaliana OX=3702 GN=UPM1 PE=1 SV=1 && PF00590:Tetrapyrrole (Corrin/Porphyrin) Methylases	-
123180529	212.246	143.948	177.775	512.707	619.45	385.482	177.99	505.88	-1.5078	1.44e-07	9.85e-06	LOC123180529	NC_057796.1	93298526	93301873	+	2031	protein_coding	probable glucan endo-1%2C6-beta-glucosidase B && sp|P23776|EXG1_YEAST Glucan 1,3-beta-glucosidase I/II OS=Saccharomyces cerevisiae (strain ATCC 204508 / S288c) OX=559292 GN=EXG1 PE=1 SV=1 && PF00150:Cellulase (glycosyl hydrolase family 5)	-
123051262	11123.4	9109.84	7684.81	25523.9	21750.4	18815.4	9306.01	22029.9	-1.24324	1.44e-07	9.87e-06	LOC123051262	NC_057799.1	29826725	29827677	-	840	protein_coding	ribulose bisphosphate carboxylase small subunit%2C chloroplastic 1-like && sp|P00871|RBS1_WHEAT Ribulose bisphosphate carboxylase small subunit, chloroplastic 1 OS=Triticum aestivum OX=4565 GN=RBCS1 PE=3 SV=2 && PF12338:Ribulose-1,5-bisphosphate carboxylase small subunit|PF00101:Ribulose bisphosphate carboxylase, small chain	M-type_MADS
123122202	467.786	83.1906	1062.7	14.1856	20.8803	16.8824	537.892	17.3161	4.95699	1.45e-07	9.92e-06	LOC123122202	NC_057808.1	409860043	409862252	-	1352	protein_coding	2-alkenal reductase (NADP(+)-dependent)-like && sp|Q9SLN8|DBR_TOBAC 2-alkenal reductase (NADP(+)-dependent) OS=Nicotiana tabacum OX=4097 GN=DBR PE=1 SV=1 && PF16884:N-terminal domain of oxidoreductase|PF00107:Zinc-binding dehydrogenase	-
123182886	693.76	367.347	258.761	114.498	123.293	60.9642	439.956	99.5851	2.14387	1.47e-07	1.01e-05	LOC123182886	NC_057796.1	454966560	454969648	-	1849	protein_coding	phosphomethylethanolamine N-methyltransferase-like%2C transcript variant X2 && sp|Q944H0|PEAM2_ARATH Phosphomethylethanolamine N-methyltransferase OS=Arabidopsis thaliana OX=3702 GN=NMT2 PE=1 SV=2 && PF13489:Methyltransferase domain|PF08241:Methyltransferase domain	-
123120543	227.029	321.546	145.183	68.9013	43.7493	64.7159	231.253	59.1222	1.96801	1.49e-07	1.02e-05	LOC123120543	NC_057808.1	252876038	252881329	+	2420	protein_coding	phosphoinositide phospholipase C 6-like && sp|Q8GV43|PLCD6_ARATH Phosphoinositide phospholipase C 6 OS=Arabidopsis thaliana OX=3702 GN=PLC6 PE=2 SV=2 && PF00388:Phosphatidylinositol-specific phospholipase C, X domain|PF00387:Phosphatidylinositol-specific phospholipase C, Y domain|PF00168:C2 domain	NF-X1
123132049	333.681	186.945	156.047	1049.73	650.274	661.228	225.558	787.078	-1.80393	1.5e-07	1.02e-05	LOC123132049	NC_057809.1	64056879	64057867	+	989	protein_coding	chlorophyll a-b binding protein of LHCII type 1-like && sp|P04784|CB21_WHEAT Chlorophyll a-b binding protein, chloroplastic OS=Triticum aestivum OX=4565 GN=WHAB1.6 PE=3 SV=1 && PF00504:Chlorophyll A-B binding protein	ERF
123187830	184.791	126.188	175.8	47.6229	29.8291	54.3989	162.26	43.9503	1.88232	1.5e-07	1.02e-05	LOC123187830	NC_057797.1	105784604	105788741	-	1974	protein_coding	pectin acetylesterase 2-like && sp|F4I839|PAE2_ARATH Pectin acetylesterase 2 OS=Arabidopsis thaliana OX=3702 GN=PAE2 PE=2 SV=1 && PF03283:Pectinacetylesterase	bHLH
543124	1031.66	773.018	953.071	438.739	363.915	294.504	919.251	365.719	1.32994	1.51e-07	1.03e-05	LOC543124	NC_057808.1	470464230	470467600	-	1950	protein_coding	COBRA-like protein 3 && sp|Q60E70|COBL3_ORYSJ COBRA-like protein 3 OS=Oryza sativa subsp. japonica OX=39947 GN=BC1L4 PE=2 SV=1 && PF04833:COBRA-like protein	C2H2
123063489	60.1892	10.282	123.455	3.03976	0	0	64.642	1.01325	6.02698	1.51e-07	1.03e-05	LOC123063489	NC_057800.1	721731855	721733846	+	1992	protein_coding	xylan glycosyltransferase MUCI21-like && sp|Q9SS43|MUC21_ARATH Xylan glycosyltransferase MUCI21 OS=Arabidopsis thaliana OX=3702 GN=MUCI21 PE=1 SV=1 && PF04577:Protein of unknown function (DUF563)	C2H2
123045722	294.61	378.564	1323.44	112.471	99.4302	134.121	665.537	115.341	2.52844	1.51e-07	1.03e-05	LOC123045722	NC_057798.1	506534162	506545623	-	2445	protein_coding	probable amino acid permease 7%2C transcript variant X1 && sp|Q9FF99|AAP7_ARATH Probable amino acid permease 7 OS=Arabidopsis thaliana OX=3702 GN=AAP7 PE=2 SV=1 && PF01490:Transmembrane amino acid transporter protein	MYB
123080617	664.193	433.713	317.032	129.697	160.083	151.004	471.646	146.928	1.68198	1.53e-07	1.04e-05	LOC123080617	NC_057802.1	577150636	577152955	-	1582	lncRNA	uncharacterized LOC123080617 && - && -	WRKY
123169156	674.753	602.898	762.457	288.777	325.137	276.684	680.036	296.866	1.19583	1.53e-07	1.04e-05	LOC123169156	NC_057814.1	434947455	434951632	+	3235	protein_coding	receptor-like protein kinase HERK 1 && sp|Q9LX66|HERK_ARATH Receptor-like protein kinase HERK 1 OS=Arabidopsis thaliana OX=3702 GN=HERK1 PE=1 SV=1 && PF07714:Protein tyrosine kinase|PF12819:Malectin-like domain	GRAS
123146679	0	0	4.93819	78.0206	33.8063	33.7648	1.64606	48.5306	-4.87758	1.55e-07	1.05e-05	LOC123146679	NC_057795.1	666677423	666678021	+	599	protein_coding	protein RADIALIS-like 3 && sp|F4JVB8|RADL1_ARATH Protein RADIALIS-like 1 OS=Arabidopsis thaliana OX=3702 GN=RL1 PE=2 SV=1 && -	MYB_related
123047564	118.267	130.862	92.838	360.718	283.376	287.939	113.989	310.678	-1.44592	1.57e-07	1.06e-05	LOC123047564	NC_057798.1	803891117	803894814	+	2391	protein_coding	uncharacterized LOC123047564%2C transcript variant X1 && - && -	-
123176804	8.44761	16.8251	5.92583	80.0471	86.5043	49.7093	10.3995	72.0869	-2.78376	1.57e-07	1.06e-05	LOC123176804	NW_025240778.1	718	3428	-	2036	protein_coding	uncharacterized LOC123176804 && - && -	-
123078073	13.7274	22.4334	17.7775	129.697	89.4872	62.8401	17.9794	94.0079	-2.38083	1.58e-07	1.07e-05	LOC123078073	NC_057802.1	168347003	168354087	-	3311	protein_coding	kinesin-like protein KIN-14B%2C transcript variant X3 && sp|A2ZRG4|KN14B_ORYSJ Kinesin-like protein KIN-14B OS=Oryza sativa subsp. japonica OX=39947 GN=KIN14B PE=3 SV=2 && PF00225:Kinesin motor domain	bHLH
123120132	1954.57	892.663	3862.65	301.95	370.875	629.339	2236.63	434.054	2.36511	1.59e-07	1.08e-05	LOC123120132	NC_057795.1	292745373	292749280	-	1351	protein_coding	uncharacterized LOC123120132 && - && PF07063:Domain of unknown function (DUF1338)	-
123106054	14079	9896.88	7478.4	4378.27	3136.03	2124.37	10484.8	3212.89	1.70638	1.6e-07	1.08e-05	LOC123106054	NC_057806.1	692057175	692059778	-	1595	protein_coding	probable apyrase 3 && sp|Q2QYE1|APY3_ORYSJ Probable apyrase 3 OS=Oryza sativa subsp. japonica OX=39947 GN=APY3 PE=2 SV=2 && PF01150:GDA1/CD39 (nucleoside phosphatase) family	-
123045366	1878.54	1875.06	1517.01	3659.87	3919.54	3494.66	1756.87	3691.36	-1.07114	1.62e-07	1.09e-05	LOC123045366	NC_057798.1	447888826	447890073	-	962	protein_coding	uncharacterized LOC123045366 && - && -	WRKY
123058571	290.387	315.003	217.28	576.542	1085.78	784.094	274.223	815.471	-1.57221	1.62e-07	1.09e-05	LOC123058571	NC_057794.1	479963692	479968159	-	1276	protein_coding	guanylyl cyclase 1-like && sp|Q8L870|GCC1_ARATH Guanylyl cyclase 1 OS=Arabidopsis thaliana OX=3702 GN=GC1 PE=1 SV=1 && PF09778:Guanylylate cyclase	-
123123214	21.119	22.4334	162.96	1.01325	0	3.75165	68.8376	1.5883	5.41429	1.62e-07	1.09e-05	LOC123123214	NC_057808.1	501143055	501145854	-	1495	protein_coding	tryptophan synthase alpha chain-like && sp|P42390|TRPA_MAIZE Indole-3-glycerol phosphate lyase, chloroplastic OS=Zea mays OX=4577 GN=BX1 PE=1 SV=2 && PF00290:Tryptophan synthase alpha chain	bZIP
123148124	328.401	153.295	463.202	73.9676	74.5727	77.8466	314.966	75.4623	2.06082	1.62e-07	1.09e-05	LOC123148124	NC_057812.1	549026937	549028782	+	1483	protein_coding	aurachin C monooxygenase/isomerase-like && - && PF01494:FAD binding domain	-
123105916	122.49	75.7128	66.1718	17.2253	20.8803	11.2549	88.125	16.4535	2.42282	1.65e-07	1.11e-05	LOC123105916	NC_057806.1	677762270	677763646	+	1250	protein_coding	uncharacterized LOC123105916 && - && -	-
123182746	362.191	175.728	196.54	50.6627	56.6752	80.6604	244.82	62.6661	1.96356	1.67e-07	1.12e-05	LOC123182746	NC_057796.1	441775504	441776687	+	1184	protein_coding	uncharacterized LOC123182746 && - && PF04520:Senescence regulator	-
123122756	29.5666	21.4987	25.6786	0	0	0	25.5813	0	7.14595	1.68e-07	1.12e-05	LOC123122756	NC_057808.1	460931196	460934807	-	2898	protein_coding	putative linoleate 9S-lipoxygenase 3 && sp|P29250|LOX2_ORYSJ Linoleate 9S-lipoxygenase 2 OS=Oryza sativa subsp. japonica OX=39947 GN=LOX1.1 PE=2 SV=2 && PF01477:PLAT/LH2 domain|PF00305:Lipoxygenase	NF-YA
123074721	176.344	52.3447	195.552	12.1591	29.8291	18.7582	141.414	20.2488	2.80275	1.69e-07	1.14e-05	LOC123074721	NC_057802.1	389739977	389741176	-	1062	protein_coding	heat stress transcription factor C-1b-like && sp|Q942D6|HFC1B_ORYSJ Heat stress transcription factor C-1b OS=Oryza sativa subsp. japonica OX=39947 GN=HSFC1B PE=2 SV=1 && PF00447:HSF-type DNA-binding	HSF
123078640	39202.2	32799.5	25462.3	71006.8	82389.9	72714.4	32488	75370.4	-1.2141	1.71e-07	1.14e-05	LOC123078640	NC_057802.1	320465909	320473265	+	1438	protein_coding	carbonic anhydrase%2C chloroplastic%2C transcript variant X2 && sp|P40880|CAHC_HORVU Carbonic anhydrase, chloroplastic OS=Hordeum vulgare OX=4513 PE=2 SV=1 && PF00484:Carbonic anhydrase	bHLH
123077833	27.4547	15.8903	254.811	4.05302	1.9886	4.68956	99.3852	3.57706	4.79346	1.72e-07	1.15e-05	LOC123077833	NC_057802.1	126785764	126787703	-	1321	protein_coding	mitochondrial arginine transporter BAC2-like && sp|Q9CA93|BAC2_ARATH Mitochondrial arginine transporter BAC2 OS=Arabidopsis thaliana OX=3702 GN=BAC2 PE=1 SV=1 && PF00153:Mitochondrial carrier protein	ERF
101290644	106.651	47.671	491.844	13.1723	19.886	24.3857	215.389	19.148	3.49007	1.73e-07	1.16e-05	LOC101290644	NC_057809.1	510981170	510984528	-	2380	protein_coding	protein NRT1/ PTR FAMILY 7.3 && sp|Q9LQL2|PTR14_ARATH Protein NRT1/ PTR FAMILY 7.3 OS=Arabidopsis thaliana OX=3702 GN=NPF7.3 PE=1 SV=2 && PF00854:POT family	G2-like
123098169	108.763	47.671	321.97	0	1.9886	0	159.468	0.662868	7.92222	1.74e-07	1.16e-05	LOC123098169	NC_057805.1	398822073	398824656	+	1770	protein_coding	branched-chain-amino-acid aminotransferase 2%2C chloroplastic-like && sp|Q9M401|BCAT3_ARATH Branched-chain-amino-acid aminotransferase 3, chloroplastic OS=Arabidopsis thaliana OX=3702 GN=BCAT3 PE=1 SV=1 && PF01063:Amino-transferase class IV	MYB_related
123085770	255.54	248.637	256.786	662.668	613.485	496.155	253.654	590.769	-1.21956	1.75e-07	1.17e-05	LOC123085770	NC_057803.1	178148852	178153125	-	1975	protein_coding	cytochrome P450 714B3-like%2C transcript variant X1 && sp|Q0DS59|C14B2_ORYSJ Cytochrome P450 714B2 OS=Oryza sativa subsp. japonica OX=39947 GN=CYP714B2 PE=1 SV=2 && PF00067:Cytochrome P450	bHLH
123053591	110.875	66.3655	305.18	23.3048	27.8405	15.0066	160.807	22.0506	2.86806	1.77e-07	1.18e-05	LOC123053591	NC_057799.1	426049565	426054204	-	1773	protein_coding	ATP-dependent 6-phosphofructokinase 2-like && sp|Q9FIK0|PFKA2_ARATH ATP-dependent 6-phosphofructokinase 2 OS=Arabidopsis thaliana OX=3702 GN=PFK2 PE=1 SV=1 && PF00365:Phosphofructokinase	ERF
123121904	723.326	515.034	1092.33	124.63	108.379	294.504	776.896	175.838	2.14244	1.77e-07	1.18e-05	LOC123121904	NC_057808.1	376688782	376689994	+	995	protein_coding	predicted GPI-anchored protein 58 && - && -	-
123041793	200.631	105.624	126.418	24.3181	45.7379	28.1373	144.224	32.7311	2.13868	1.78e-07	1.19e-05	LOC123041793	NC_057798.1	622510253	622511200	+	948	protein_coding	uncharacterized LOC123041793 && - && -	-
123085243	651.522	398.193	441.474	2229.16	1516.31	1060.78	497.063	1602.08	-1.68875	1.8e-07	1.2e-05	LOC123085243	NC_057803.1	75940988	75945680	+	1905	protein_coding	metal tolerance protein 4 && sp|Q10PP8|MTP4_ORYSJ Metal tolerance protein 4 OS=Oryza sativa subsp. japonica OX=39947 GN=MTP4 PE=2 SV=1 && PF01545:Cation efflux family|PF16916:Dimerisation domain of Zinc Transporter	Dof
123080073	613.508	515.034	392.092	133.75	125.282	224.161	506.878	161.064	1.6528	1.82e-07	1.21e-05	LOC123080073	NC_057802.1	509863410	509866001	+	1299	protein_coding	fructokinase-1-like && sp|Q0JGZ6|SCRK1_ORYSJ Fructokinase-1 OS=Oryza sativa subsp. japonica OX=39947 GN=FRK1 PE=1 SV=2 && PF00294:pfkB family carbohydrate kinase	MIKC_MADS
123103963	100.315	100.95	159.01	25.3314	26.8462	36.5785	120.092	29.5854	2.01912	1.83e-07	1.22e-05	LOC123103963	NC_057806.1	454954397	454959265	+	1716	protein_coding	heat stress transcription factor B-1-like && sp|Q67TP9|HSFB1_ORYSJ Heat stress transcription factor B-1 OS=Oryza sativa subsp. japonica OX=39947 GN=HSFB1 PE=2 SV=1 && PF00447:HSF-type DNA-binding	HSF
123045376	420.268	325.285	570.855	144.895	158.094	163.197	438.803	155.395	1.49721	1.85e-07	1.23e-05	LOC123045376	NC_057798.1	449584668	449588235	+	2040	protein_coding	uncharacterized LOC123045376 && sp|Q7VD61|PYRH_PROMA Uridylate kinase OS=Prochlorococcus marinus (strain SARG / CCMP1375 / SS120) OX=167539 GN=pyrH PE=3 SV=1 && PF13837:Myb/SANT-like DNA-binding domain|PF00696:Amino acid kinase family	Trihelix
[truncated: 4,360 more rows]

## Sheet: CWI78968_deg_all
Table S2 Differentially expressed genes (DEGs) between the Treatment and CK of CWI44398, CWI78968, and CWI44183
[truncated: 4,301 more rows]

## Sheet: CWI44183_deg_all
Table S2 Differentially expressed genes (DEGs) between the Treatment and CK of CWI44398, CWI78968, and CWI44183
[truncated: 5,016 more rows]
